# Supplementary material for: Solanum tuberosum Microtuber Development under Darkness Unveiled through RNAseq Transcriptomic Analysis
Source: MDPI journal article supplement (doi:10.3390/ijms232213835), 2022-11-10
Supplement: s1 [file s1]

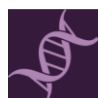

Article

Supplementary Tables S1

# *Solanum tuberosum* Microtuber development under darkness unveiled through RNAseq Transcriptomic analysis.

Valencia-Lozano E, Herrera-Isidron L, Flores-López JA, Recoder-Melendez OS, Barraza-Celis A and Cabrera-Ponce JL

**Tables S1.** Upregulated Genes with Response to cytokinins and Associated function,

Response to Osmotic stress and Associated function, Response to One Carbon Metabolism and Associated function, Response to Carbon Metabolism and Associated function, Related to Citrate Cycle and Associated function, to Acyl Carrier Proteins and Associated function, to Fatty acid biosynthesis and metabolism and Associated function, to Thylakoids and Associated function, to Redoxins and Associated function, to Response to oxidative stress and Associated function, to Ribosomal proteins, Mutants and Associated function, to Immunophylins and Associated function, to Mitotic cell cycle and Associated function, to E2F activation and Associated function, to Cytoskeleton and Associated function, to Motor proteins and Associated function, to Methylation and Associated function, to Histone binding and Associated function, to Sterol biosynthetic process and terpenoid backbone biosynthesis and Associated function, to Amino sugar and nucleotide sugar metabolism and Associated function, to Sulfur metabolism and Associated function, to Disulfide isomerase activity and Associated function, Related to DNA replication and Associated function. Primer design of DEG used to validate the genome-wide analysis of MTs development of potato *S. tuberosum* cv. Alpha.

Upregulated Genes with Response to cytokinins and Associated function.

| N° | ID <i>A. thaliana</i> | ID <i>Solanum tuberosum</i> | Associated function                                                                      |
|----|-----------------------|-----------------------------|------------------------------------------------------------------------------------------|
| 1  | <i>ARR8</i>           | PGSC0003DMT400076758        | Two-component response regulator arr-a family.                                           |
| 2  | <i>ARR1</i>           | PGSC0003DMT400060506        | Two-component response regulator arr-b family.                                           |
| 3  | <i>ARR2</i>           | PGSC0003DMT400065835        | Two-component response regulator arr-b family.                                           |
| 4  | <i>RR3</i>            | PGSC0003DMT400076758        | Functions as response regulator involved in His-to-Asp phosphorelay signal transduction. |
| 5  | <i>ARR4</i>           | PGSC0003DMT400058306        | Two-component response regulator arr-a family.                                           |
| 6  | <i>ARR5</i>           | PGSC0003DMT400063187        | Two-component response regulator ARR5.                                                   |
| 7  | <i>ARR9</i>           | PGSC0003DMT400076726        | Two-component response regulator ARR9.                                                   |
| 8  | <i>ARR11</i>          | PGSC0003DMT400031260        | Two-component response regulator ARR11.                                                  |
| 9  | <i>FBA6</i>           | PGSC0003DMT400006894        | Fructose-bisphosphate aldolase, class I.                                                 |

|    |                  |                      |                                                                       |
|----|------------------|----------------------|-----------------------------------------------------------------------|
| 10 | <i>ENO1</i>      | PGSC0003DMT400062986 | Enolase 1, chloroplastic.                                             |
| 11 | <i>EBP</i>       | PGSC0003DMT400043311 | Ethylene-responsive transcription factor RAP2-3.                      |
| 12 | <i>GAPCP-1</i>   | PGSC0003DMT400029242 | Glyceraldehyde-3-phosphate dehydrogenase GAPCP1, chloroplastic.       |
| 13 | <i>DAP</i>       | PGSC0003DMT400069487 | Pyridoxal phosphate (PLP)-dependent transferases superfamily protein. |
| 14 | <i>ACC1</i>      | PGSC0003DMT400022054 | Acetyl-CoA carboxylase/ biotin carboxylase 1.                         |
| 15 | <i>TIL</i>       | PGSC0003DMT400020425 | Apolipoprotein d and lipocalin family protein.                        |
| 16 | <i>TPI</i>       | PGSC0003DMT400071330 | Triosephosphate isomerase, cytosolic.                                 |
| 17 | <i>MDH</i>       | PGSC0003DMT400050235 | Plastidic nad-dependent malate dehydrogenase.                         |
| 18 | <i>APX3</i>      | PGSC0003DMT400015799 | L-ascorbate peroxidase 3.                                             |
| 19 | <i>APS1</i>      | PGSC0003DMT400034962 | 3'-phosphoadenosine 5'-phosphosulfate synthase.                       |
| 20 | <i>CSP41A</i>    | PGSC0003DMT400033560 | Chloroplast stem-loop binding protein of 41 kDa a, chloroplastic.     |
| 21 | <i>ZFP5</i>      | PGSC0003DMT400040327 | Zinc finger protein 5.                                                |
| 22 | <i>AT5G19370</i> | PGSC0003DMT400012014 | Rhodanese-like domain-containing protein.                             |
| 23 | <i>AT1G68360</i> | -                    | Diaminopimelate epimerase, chloroplastic.                             |
| 24 | <i>LOG10</i>     | PGSC0003DMT400057413 | Riboside 5'-monophosphate phosphoribohydrolase log10.                 |
| 25 | <i>LOG3</i>      | PGSC0003DMT400027157 | Cytokinin riboside 5'-monophosphate phosphoribohydrolase.             |
| 26 | <i>HXK1</i>      | PGSC0003DMT400006474 | Hexokinase-1.                                                         |

## Upregulated Genes with Response to Osmotic stress and Associated function.

| N° | ID <i>A. thaliana</i> | ID <i>Solanum tuberosum</i> | Associated function                                   |
|----|-----------------------|-----------------------------|-------------------------------------------------------|
| 1  | <i>FBA6</i>           | PGSC0003DMT400006894        | Fructose-bisphosphate aldolase, class I.              |
| 2  | <i>CRT1b</i>          | Calreticulin                | Calreticulin 1b.                                      |
| 3  | <i>TUB8</i>           | PGSC0003DMT400028800        | Tubulin beta-8 chain.                                 |
| 4  | <i>LOS2</i>           | Enolase-like                | Bifunctional enolase 2/<br>transcriptional activator. |
| 5  | <i>LOS2</i>           | PGSC0003DMT400028690        | Bifunctional enolase 2/<br>transcriptional activator. |
| 6  | <i>ENO1</i>           | PGSC0003DMT400062986        | Enolase 1, chloroplastic.                             |
| 7  | <i>TPI</i>            | PGSC0003DMT400071330        | Triosephosphate isomerase,<br>cytosolic.              |
| 8  | <i>mMDH1</i>          | MMDH                        | Lactate/malate dehydrogenase<br>family protein.       |
| 9  | <i>MDH</i>            | PGSC0003DMT400050235        | Plastidic nad-dependent malate<br>dehydrogenase.      |
| 10 | <i>FSD2</i>           | PGSC0003DMT400013447        | Superoxide dismutase [Fe] 2,<br>chloroplastic.        |
| 11 | <i>FSD2</i>           | PGSC0003DMT400070920        | Superoxide dismutase [Fe] 2,<br>chloroplastic.        |
| 12 | <i>MSD1</i>           | PGSC0003DMT400042937        | Superoxide dismutase [Mn] 1,<br>mitochondrial.        |
| 13 | <i>AT3G52960</i>      | Peroxioredoxin-2E-2         | Peroxioredoxin-2E, chloroplastic.                     |
| 14 | <i>At5g06290</i>      | PGSC0003DMT400042222        | 2-Cys peroxiredoxin BAS1-like,<br>chloroplastic.      |
| 15 | <i>GPX7</i>           | PGSC0003DMT400067601        | Putative glutathione peroxidase 7,<br>chloroplastic.  |
| 16 | <i>AT3G52960</i>      | PGSC0003DMT400072641        | Peroxioredoxin-2E.                                    |
| 17 | <i>At5g06290</i>      | PGSC0003DMT400072569        | 2-Cys peroxiredoxin BAS1-like,<br>chloroplastic.      |
| 18 | <i>GSTF8</i>          | PGSC0003DMT400029561        | Glutathione S-transferase F8,<br>chloroplastic.       |

|    |           |                      |                                                  |
|----|-----------|----------------------|--------------------------------------------------|
| 19 | CNX1      | PGSC0003DMT400036920 | Calnexin homolog 1.                              |
| 20 | ATARCA    | PGSC0003DMT400014419 | Transducin/WD40 repeat-like superfamily protein. |
| 21 | RACK1B_AT | PGSC0003DMT400074094 | Receptor for activated C kinase 1B.              |

Upregulated Genes with Response to One Carbon Metabolism and Associated function.

| N° | ID <i>A. thaliana</i> | ID <i>Solanum tuberosum</i> | Associated function                                          |
|----|-----------------------|-----------------------------|--------------------------------------------------------------|
| 1  | SHM1                  | PGSC0003DMT400016362        | Serine hydroxymethyltransferase 1, mitochondrial.            |
| 2  | THY-1                 | PGSC0003DMT400001937        | Bifunctional dihydrofolate reductase-thymidylate synthase 1. |
| 3  | MAT3                  | PGSC0003DMT400072701        | Methionine adenosyltransferase 3.                            |
| 4  | SMT2                  | PGSC0003DMT400047969        | 24-methylenesterol C-methyltransferase 2.                    |
| 5  | SHM4                  | PGSC0003DMT400040717        | Glycine hydroxymethyltransferase.                            |

Upregulated Genes with Response to Carbon Metabolism and Associated function.

| N° | ID <i>A. thaliana</i> | ID <i>Solanum tuberosum</i> | Associated function                                          |
|----|-----------------------|-----------------------------|--------------------------------------------------------------|
| 1  | CAC2                  | PGSC0003DMT400042238        | Acetyl Co-enzyme a carboxylase biotin carboxylase subunit.   |
| 2  | CAC1                  | PGSC0003DMT400083101        | Biotin carboxyl carrier protein of acetyl-CoA carboxylase 1. |
| 3  | ACAT2                 | PGSC0003DMT400028289        | Acetyl-CoA acetyltransferase, cytosolic 1.                   |
| 4  | EMB3003               | PGSC0003DMT400023831        | Pyruvate dehydrogenase e2 component.                         |
| 5  | AT2G35120             | PGSC0003DMT400027015        | Glycine cleavage system H protein 2, mitochondrial.          |

|    |                  |                      |                                                                     |
|----|------------------|----------------------|---------------------------------------------------------------------|
| 6  | <i>At1g01090</i> | PGSC0003DMT400007571 | Pyruvate dehydrogenase E1 component subunit alpha-3, chloroplastic. |
| 7  | <i>SHM4</i>      | PGSC0003DMT400040717 | Glycine hydroxymethyltransferase.                                   |
| 8  | <i>SHM1</i>      | PGSC0003DMT400016362 | Serine hydroxymethyltransferase 1.                                  |
| 9  | <i>MTHFR2</i>    | PGSC0003DMT400041701 | Methylenetetrahydrofolate reductase (nadph).                        |
| 10 | <i>ASP1</i>      | PGSC0003DMT400017112 | Aspartate aminotransferase, mitochondrial.                          |
| 11 | <i>PPC3</i>      | PGSC0003DMT400054791 | Phosphoenolpyruvate carboxylase (PEPC).                             |
| 12 | <i>FDH</i>       | PGSC0003DMT400001303 | Formate dehydrogenase, chloroplastic/mitochondrial.                 |
| 13 | <i>AT2G34590</i> | PGSC0003DMT400019358 | Pyruvate dehydrogenase E1 component subunit beta-3, chloroplastic.  |
| 14 | <i>PPC3</i>      | PGSC0003DMT400039809 | Phosphoenolpyruvate carboxylase (PEPC).                             |
| 15 | <i>mMDH1</i>     | PGSC0003DMT400032266 | Lactate/malate dehydrogenase family protein.                        |
| 16 | <i>PPC4</i>      | PGSC0003DMT400019322 | Phosphoenolpyruvate carboxylase 4.                                  |
| 17 | <i>MDH</i>       | PGSC0003DMT400050235 | Plastidic nad-dependent malate dehydrogenase.                       |
| 18 | <i>PKP-ALPHA</i> | PGSC0003DMT400066112 | Plastidial pyruvate kinase 1.                                       |
| 19 | <i>PKp3</i>      | PGSC0003DMT400062238 | Plastidial pyruvate kinase 3, chloroplastic.                        |
| 20 | <i>AT3G52990</i> | PGSC0003DMT400072411 | Pyruvate kinase family protein.                                     |
| 21 | <i>AT3G02360</i> | PGSC0003DMT400064670 | 6-phosphogluconate dehydrogenase, decarboxylating 3.                |
| 22 | <i>EMB2024</i>   | PGSC0003DMT400047627 | Probable 6-phosphogluconolactonase 5, chloroplastic.                |
| 23 | <i>AT3G52990</i> | PGSC0003DMT400006945 | Pyruvate kinase family protein.                                     |
| 24 | <i>GAPCP-2</i>   | PGSC0003DMT400029242 | Glyceraldehyde-3-phosphate dehydrogenase GAPCP2.                    |

|    |                  |                      |                                                                             |
|----|------------------|----------------------|-----------------------------------------------------------------------------|
| 25 | <i>GAPC2</i>     | PGSC0003DMT400044944 | Glyceraldehyde-3-phosphate dehydrogenase GAPC2.                             |
| 26 | <i>PGK</i>       | PGSC0003DMT400056871 | Encodes cytosolic phosphoglycerate kinase (PGK)                             |
| 27 | <i>AT1G12230</i> | PGSC0003DMT400012218 | Aldolase superfamily protein.                                               |
| 28 | <i>FBA6</i>      | PGSC0003DMT400006894 | Fructose-bisphosphate aldolase, class I.                                    |
| 29 | <i>LOS2</i>      | PGSC0003DMT400007048 | Bifunctional enolase 2/ transcriptional activator.                          |
| 30 | <i>ENO1</i>      | PGSC0003DMT400062986 | Enolase 1, chloroplastic.                                                   |
| 31 | <i>TPI</i>       | PGSC0003DMT400071330 | Triosephosphate isomerase, cytosolic.                                       |
| 32 | <i>OASA1</i>     | PGSC0003DMT400082113 | O-acetylserine (thiol) lyase (oas-tl) isoform a1.                           |
| 33 | <i>SERAT2;2</i>  | PGSC0003DMT400037270 | Serine acetyltransferase 3, mitochondrial.                                  |
| 34 | <i>AT1G22170</i> | PGSC0003DMT400024493 | Phosphoglycerate mutase family protein.                                     |
| 35 | <i>LOS2</i>      | PGSC0003DMT400028690 | Bifunctional enolase 2/ transcriptional activator.                          |
| 36 | <i>CYSC1</i>     | PGSC0003DMT400000156 | Bifunctional L-3-cyanoalanine synthase/cysteine synthase C1, mitochondrial. |
| 37 | <i>PGDH</i>      | PGSC0003DMT400023675 | D-3-phosphoglycerate dehydrogenase / 2-oxoglutarate reductase.              |
| 38 | <i>EDA9</i>      | PGSC0003DMT400059818 | D-3-phosphoglycerate dehydrogenase / 2-oxoglutarate reductase.              |

Upregulated Genes Related to Citrate Cycle and Associated function.

| N° | ID <i>A. thaliana</i> | ID <i>Solanum tuberosum</i> | Associated function                               |
|----|-----------------------|-----------------------------|---------------------------------------------------|
| 1  | <i>ACLB-1</i>         | PGSC0003DMT400061710        | ATP-citrate synthase beta chain protein 1.        |
| 2  | <i>PPC3</i>           | PGSC0003DMT400054791        | Cytosolic phosphoenolpyruvate carboxylase (PEPC). |

|    |                  |                      |                                                      |
|----|------------------|----------------------|------------------------------------------------------|
| 3  | <i>PPC3</i>      | PGSC0003DMT400039809 | Cytosolic phosphoenolpyruvate carboxylase (PEPC).    |
| 4  | <i>ACLB-2</i>    | PGSC0003DMT400011963 | ATP-citrate synthase beta chain protein 2.           |
| 5  | <i>FDH</i>       | PGSC0003DMT400001303 | Formate dehydrogenase.                               |
| 6  | <i>mMDH1</i>     | PGSC0003DMT400032266 | Lactate/malate dehydrogenase family protein.         |
| 7  | <i>PPC4</i>      | PGSC0003DMT400019322 | Phosphoenolpyruvate carboxylase 4.                   |
| 8  | <i>ACLA-2</i>    | PGSC0003DMT400035064 | ATP-citrate synthase alpha chain protein 2.          |
| 9  | <i>At1g01090</i> | PGSC0003DMT400007571 | Pyruvate dehydrogenase E1 component subunit alpha 3. |
| 10 | <i>MDH</i>       | PGSC0003DMT400050235 | Plastidic nad-dependent malate dehydrogenase.        |
| 11 | <i>PKP-ALPHA</i> | PGSC0003DMT400066112 | Plastidial pyruvate kinase 1.                        |
| 12 | <i>AT2G34590</i> | PGSC0003DMT400019358 | Pyruvate dehydrogenase E1 component subunit beta-3.  |
| 13 | <i>AT3G52990</i> | PGSC0003DMT400006945 | Pyruvate kinase family protein.                      |
| 14 | <i>AT3G52990</i> | PGSC0003DMT400072411 | Pyruvate kinase family protein.                      |
| 15 | <i>AT4G17260</i> | PGSC0003DMT400012233 | Lactate/malate dehydrogenase family protein.         |
| 16 | <i>EMB3003</i>   | PGSC0003DMT400023831 | Pyruvate dehydrogenase e2 component.                 |

Upregulated Genes Related to Acyl Carrier Proteins and Associated function.

| N° | ID <i>A. thaliana</i> | ID <i>Solanum tuberosum</i> | Associated function     |
|----|-----------------------|-----------------------------|-------------------------|
| 1  | <i>ACP4</i>           | PGSC0003DMT400036981        | Acyl carrier protein 4. |
| 2  | <i>ACP2</i>           | PGSC0003DMT400079040        | Acyl carrier protein 2. |
| 3  | <i>ACP5</i>           | PGSC0003DMT400027652        | Acyl carrier protein 5. |

|   |                  |                      |                                                                    |
|---|------------------|----------------------|--------------------------------------------------------------------|
| 4 | <i>AT5G10160</i> | PGSC0003DMT400032718 | Thioesterase superfamily protein.                                  |
| 5 | <i>EMB3147</i>   | PGSC0003DMT400055055 | Catalytic transferases acyl-carrier-protein S-malonyltransferases. |
| 6 | <i>AT1G24360</i> | PGSC0003DMT400069374 | 3-oxoacyl-[acyl-carrier-protein] reductase.                        |

Upregulated Genes Related to Fatty acid biosynthesis and metabolism and Associated function.

| N° | ID <i>A. thaliana</i> | ID <i>Solanum tuberosum</i> | Associated function                                                         |
|----|-----------------------|-----------------------------|-----------------------------------------------------------------------------|
| 1  | <i>AT5G59770</i>      | PGSC0003DMT400040154        | Very-long-chain (3R)-3-hydroxyacyl-CoA dehydratase.                         |
| 2  | <i>KCR1</i>           | PGSC0003DMT400032914        | Very-long-chain 3-oxoacyl-CoA reductase 1.                                  |
| 3  | <i>CER10</i>          | PGSC0003DMT400060224        | 3-oxo-5- $\alpha$ -steroid 4-dehydrogenase family protein.                  |
| 4  | <i>PAS2</i>           | PGSC0003DMT400060612        | Very-long-chain (3r)-3-hydroxyacyl-coa dehydratase.                         |
| 5  | <i>AT5G10160</i>      | PGSC0003DMT400032718        | Thioesterase superfamily protein.                                           |
| 6  | <i>AT1G24360</i>      | PGSC0003DMT400045027        | 3-oxoacyl-[acyl-carrier-protein] reductase, chloroplastic.                  |
| 7  | <i>FAB1</i>           | PGSC0003DMT400035344        | 3-oxoacyl-[acyl-carrier-protein] synthase II, chloroplastic.                |
| 8  | <i>T3P18.20</i>       | PGSC0003DMT400067652        | 3-oxoacyl-[acyl-carrier-protein] synthase III, chloroplastic.               |
| 9  | <i>KASI</i>           | PGSC0003DMT400077561        | 3-oxoacyl-[acyl-carrier-protein] synthase I, chloroplastic.                 |
| 10 | <i>AT1G24360</i>      | PGSC0003DMT400069374        | 3-oxoacyl-[acyl-carrier-protein] reductase, chloroplastic.                  |
| 11 | <i>CAC1</i>           | PGSC0003DMT400083101        | Biotin carboxyl carrier protein of acetyl-CoA carboxylase 1, chloroplastic. |



|    |                |                      |                                                                              |
|----|----------------|----------------------|------------------------------------------------------------------------------|
| 12 | <i>EMB3147</i> | PGSC0003DMT400055055 | Catalytic transferases [acyl-carrier-protein] S-malonyltransferases binding. |
| 13 | <i>CAC2</i>    | PGSC0003DMT400042238 | Acetyl Co-enzyme A carboxylase biotin carboxylase subunit.                   |
| 14 | <i>ACAT2</i>   | PGSC0003DMT400028289 | Acetyl-CoA acetyltransferase, cytosolic 1.                                   |

#### Upregulated Genes Related to Thylakoids and Associated function.

| Nº | ID <i>A. thaliana</i> | ID <i>Solanum tuberosum</i> | Associated function                                             |
|----|-----------------------|-----------------------------|-----------------------------------------------------------------|
| 1  | <i>FDH</i>            | PGSC0003DMT400001303        | Formate dehydrogenase, chloroplastic/mitochondrial.             |
| 2  | <i>AT2G34460</i>      | PGSC0003DMT400021415        | NAD(P)-binding Rossmann-fold superfamily protein.               |
| 3  | <i>AOR</i>            | PGSC0003DMT400079606        | Oxidoreductase, zinc-binding dehydrogenase family protein.      |
| 4  | <i>PnsB5</i>          | PGSC0003DMT400015589        | Photosynthetic ndh subcomplex b5.                               |
| 5  | <i>PSI-P</i>          | PGSC0003DMT400029398        | Thylakoid membrane phosphoprotein of 14 kDa.                    |
| 6  | <i>CSP41A</i>         | PGSC0003DMT400033560        | Chloroplast stem-loop binding protein of 41 kDa, chloroplastic. |
| 7  | <i>ATHM2</i>          | PGSC0003DMT400055831        | Thioredoxin superfamily protein.                                |
| 8  | <i>AT3G52960</i>      | PGSC0003DMT400072641        | Peroxisoredoxin-2E, chloroplastic.                              |
| 9  | <i>AT3G52960</i>      | PGSC0003DMT400007049        | Peroxisoredoxin-2E-2, chloroplastic-like.                       |
| 10 | <i>FSD2</i>           | PGSC0003DMT400013447        | Superoxide dismutase [Fe] 2, chloroplastic.                     |
| 11 | <i>FSD2</i>           | PGSC0003DMT400070920        | Superoxide dismutase [Fe].                                      |
| 12 | <i>TROL</i>           | PGSC0003DMT400000605        | Rhodanese-like domain-containing protein 4.                     |

|    |              |                      |                                                        |
|----|--------------|----------------------|--------------------------------------------------------|
| 13 | <i>Pnsl5</i> | PGSC0003DMT400013412 | Peptidyl-prolyl cis-trans isomerase b (cyclophilin b). |
|----|--------------|----------------------|--------------------------------------------------------|

Upregulated Genes Related to Redoxins and Associated function.

| N° | ID <i>A. thaliana</i> | ID <i>Solanum tuberosum</i> | Associated function                               |
|----|-----------------------|-----------------------------|---------------------------------------------------|
| 1  | <i>GPX7</i>           | PGSC0003DMT400067601        | Putative glutathione peroxidase 7, chloroplastic. |
| 2  | <i>MSD1</i>           | PGSC0003DMT400042937        | Superoxide dismutase [Mn] 1, mitochondrial.       |
| 3  | <i>At5g06290</i>      | PGSC0003DMT400072569        | 2-Cys peroxiredoxin BAS1-like.                    |
| 4  | <i>ATHM2</i>          | PGSC0003DMT400055831        | Thioredoxin superfamily protein.                  |
| 5  | <i>AT3G52960</i>      | PGSC0003DMT400072641        | Peroxiredoxin-2E, chloroplastic.                  |
| 6  | <i>AT3G52960</i>      | PGSC0003DMT400007049        | Peroxiredoxin-2E-2, chloroplastic-like.           |
| 7  | <i>FSD2</i>           | PGSC0003DMT400013447        | Superoxide dismutase [Fe] 2, chloroplastic.       |
| 8  | <i>FSD2</i>           | PGSC0003DMT400070920        | Superoxide dismutase [fe], chloroplastic.         |
| 9  | <i>At5g06290</i>      | PGSC0003DMT400042222        | 2-Cys peroxiredoxin BAS1-like, chloroplastic.     |

Upregulated Genes Related to Response to oxidative stress and Associated function.

| N° | ID <i>A. thaliana</i> | ID <i>Solanum tuberosum</i> | Associated function                               |
|----|-----------------------|-----------------------------|---------------------------------------------------|
| 1  | <i>GPX7</i>           | PGSC0003DMT400067601        | Putative glutathione peroxidase 7, chloroplastic. |
| 2  | <i>MSD1</i>           | PGSC0003DMT400042937        | Superoxide dismutase [Mn] 1, mitochondrial.       |
| 3  | <i>At5g06290</i>      | PGSC0003DMT400072569        | 2-Cys peroxiredoxin BAS1-like, chloroplastic.     |
| 4  | <i>AT3G52960</i>      | PGSC0003DMT400072641        | Peroxiredoxin-2E, chloroplastic.                  |

---

|   |                  |                      |                                                  |
|---|------------------|----------------------|--------------------------------------------------|
| 5 | <i>AT3G52960</i> | PGSC0003DMT400007049 | Peroxioredoxin-2E-2,<br>chloroplastic-like.      |
| 6 | <i>FSD2</i>      | PGSC0003DMT400013447 | Superoxide dismutase [Fe] 2,<br>chloroplastic.   |
| 7 | <i>FSD2</i>      | PGSC0003DMT400070920 | Superoxide dismutase [fe],<br>chloroplastic.     |
| 8 | <i>At5g06290</i> | PGSC0003DMT400042222 | 2-Cys peroxiredoxin BAS1-like,<br>chloroplastic. |

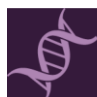

Upregulated Genes Related to Ribosomal proteins, Mutants and Associated function.

1

| N° | ID <i>A. thaliana</i> | ID <i>S. tuberosum</i> | Annotated function     | Extrarribosomal function                                                                                                                                               | Mutant phenotype                                                                                                                                                                                                                                                                                                                                         |
|----|-----------------------|------------------------|------------------------|------------------------------------------------------------------------------------------------------------------------------------------------------------------------|----------------------------------------------------------------------------------------------------------------------------------------------------------------------------------------------------------------------------------------------------------------------------------------------------------------------------------------------------------|
| 1  | <i>RPSA</i>           | PGSC0003DMT400039497   | Ribosomal protein SA   | -                                                                                                                                                                      | Cases of isolated congenital asplenia.                                                                                                                                                                                                                                                                                                                   |
| 2  | <i>RPS2e</i>          | PGSC0003DMT400063904   | Ribosomal protein S2e  | -                                                                                                                                                                      | -                                                                                                                                                                                                                                                                                                                                                        |
| 3  | <i>RPS3a</i>          | PGSC0003DMT400083968   | Ribosomal protein S3a  | -                                                                                                                                                                      | -                                                                                                                                                                                                                                                                                                                                                        |
| 4  | <i>RPS6a</i>          | RPS6a                  | Ribosomal protein S6a  | Key downstream effector of the TOR signaling pathway (Chen et al., 2018 [1]). Free RPS6 binds directly to the rRNA gene promoter in Arabidopsis (Kim et al., 2014 [2]) | Embryo lethal (Tzafrir et al., 2003 [3]); Reduced leaf area and enhanced var2-mediated leaf variegation (Wang et al., 2018 [4]), slow growth (haplodeficiency) in paralog A-B double mutant (Creff et al., 2010 [5]). Low temperature albino phenotype (Wang et al., 2018 [4]), pale leaves and defective thylakoid architecture (Sun et al., 2016 [6]). |
| 5  | <i>RPS13</i>          | PGSC0003DMT400070434   | Ribosomal protein S2e  | Induced by low temperature treatment (Kim et al., 2004 [7]).                                                                                                           | Narrow pointed leaves; change of shape of trichomes; delayed root growth (Ito et al., 2000 [8]); late flowering, Embryo lethal (Romani et al., 2012 [9]).                                                                                                                                                                                                |
| 6  | <i>RPS15a-1</i>       | PGSC0003DMT400065156   | Ribosomal protein S15a | -                                                                                                                                                                      | Type II uS8, evolutionarily divergent and plant-specific paralogue, larger leaf, root and cell area (Szick-Miranda et al., 2010 [10])                                                                                                                                                                                                                    |
| 7  | <i>RPS16</i>          | PGSC0003DMT400077257   | Ribosomal protein S9   | -                                                                                                                                                                      | Abnormal pollen development and impaired pollen tube growth (Lu et al., 2020 [11]). Embryo lethal (Ma and Dooner, 2004 [12]), albino in three-leaf stage in rice (Qiu et al., 2018 [13]).                                                                                                                                                                |

|    |               |                      |                        |                                                                                                                                                                    |                                                                                                                                                                                      |
|----|---------------|----------------------|------------------------|--------------------------------------------------------------------------------------------------------------------------------------------------------------------|--------------------------------------------------------------------------------------------------------------------------------------------------------------------------------------|
| 8  | <i>RPS17</i>  | PGSC0003DMT400060127 | Ribosomal protein S17  | -                                                                                                                                                                  | Embryo lethal (Tzafrir et al., 2004 [14]); Reductions in growth, leaf pigments and photosynthesis (Romani et al., 2012 [9]), embryo lethality in maize (Schultes et al., 2000 [15]). |
| 9  | <i>RPS25e</i> | PGSC0003DMT400054605 | Ribosomal protein S25e | -                                                                                                                                                                  | -                                                                                                                                                                                    |
| 10 | <i>RPS29</i>  | PGSC0003DMT400069470 | Ribosomal protein S29  | Contain the conserved zinc finger motif that could take on a wide variety of cellular functions by providing stable structural scaffolds (Chan et al., 1993 [16]). | -                                                                                                                                                                                    |
| 11 | <i>RPS30</i>  | PGSC0003DMT400006164 | Ribosomal protein S30  | -                                                                                                                                                                  | Indole-3-carbinol tolerance (Finkelshtein et al., 2021 [17]).                                                                                                                        |
| 12 | <i>RPL4</i>   | PGSC0003DMT400071725 | Ribosomal protein L1   | -                                                                                                                                                                  | Embryo lethal. Abnormal basal ribosome activity, abnormal transition from globular to heart stage of embryogenesis (Romani et al., 2012 [9]).                                        |
| 13 | <i>RPL8</i>   | PGSC0003DMT400064385 | Ribosomal protein L8   | -                                                                                                                                                                  | Embryo lethal (Tzafrir et al., 2004 [14]).                                                                                                                                           |
| 14 | <i>RPL11</i>  | PGSC0003DMT400031869 | Ribosomal protein L11  | -                                                                                                                                                                  | Mutant has decreased the effective quantum yield of photosystem II; Pale green plants; Reduced growth rate.                                                                          |
| 15 | <i>RPL12</i>  | PGSC0003DMT400008687 | Ribosomal protein L12  | -                                                                                                                                                                  | Decreased non-host disease resistance against bacterial pathogens (Nagaraj et al., 2016 [18]); Albino lethal phenotype at seedling stage (Zhao et al., 2016 [19]).                   |
| 16 | <i>RPL13a</i> | PGSC0003DMT400040760 | Ribosomal protein L13a | Overexpression of a brinjal RPL13a in potato has been observed to enhance resistance to <i>Verticillium dahliae</i> (Yang et al., 2013 [20]).                      | Single base substitution affects chloroplast development in rice grown under low temperature conditions (Song et al., 2014 [21]),                                                    |

|    |               |                      |                                                                 |                                                                                                                                                                                                                                                |                                                                                                                                                                                                                                             |
|----|---------------|----------------------|-----------------------------------------------------------------|------------------------------------------------------------------------------------------------------------------------------------------------------------------------------------------------------------------------------------------------|---------------------------------------------------------------------------------------------------------------------------------------------------------------------------------------------------------------------------------------------|
|    |               |                      |                                                                 |                                                                                                                                                                                                                                                | lethal albino seedlings of T-DNA insertion mutants (Lee et al., 2019 [22]).                                                                                                                                                                 |
| 17 | <i>RPL18</i>  | PGSC0003DMT400011931 | Ribosomal protein L18                                           | -                                                                                                                                                                                                                                              | Non-cellularized endosperm and arrested embryos (Zhang et al., 2015 [23]); Reduced leaf area (Wang et al., 2018 [4]); Required for both male gametophyte function and embryo development (Yan et al., 2016 [24]).                           |
| 18 | <i>RPL24</i>  | PGSC0003DMT400085766 | Ribosomal protein L24                                           | Essential for translation initiation of several proteins, including ETTIN (ETT) and MONOPTEROS (MP) (auxin response factors) (Nishimura et al., 2005 [25]); Plays an indirect role in promoting MIR gene transcription (Li et al., 2017 [26]). | Suppresses proline accumulation of the parental mutant zinc ring finger 1 ( <i>atrzf1</i> ) of <i>Arabidopsis thaliana</i> (Park et al., 2017 [27]); Reductions in growth, leaf pigments and photosynthesis (Romani et al., 2012 [9]).      |
| 19 | <i>RPL24e</i> | PGSC0003DMT400072655 | Ribosomal protein L24e                                          | -                                                                                                                                                                                                                                              | Narrow pointed leaves; cotyledon and leaf vascular pattern defects; defects of the apical-basal pattern of the gynoecium; reduced plant size; reduced fertility (Nishimura et al., 2005 [25]).                                              |
| 20 | <i>RPL25</i>  | PGSC0003DMT400040794 | Ribosomal protein L25                                           | -                                                                                                                                                                                                                                              | -                                                                                                                                                                                                                                           |
| 21 | <i>RPL27</i>  | RPL27                | Structural constituent of the ribosome; involved in translation | -                                                                                                                                                                                                                                              | Abnormal basal ribosome activity, abnormal transition from globular to heart stage of embryogenesis.                                                                                                                                        |
| 22 | <i>RPL27</i>  | PGSC0003DMT400061374 | Ribosomal protein L27                                           | -                                                                                                                                                                                                                                              | Abnormal basal ribosome activity, abnormal transition from globular to heart stage of embryogenesis.                                                                                                                                        |
| 23 | <i>RPL27a</i> | PGSC0003DMT400046820 | Ribosomal protein L27a                                          | -                                                                                                                                                                                                                                              | Affected plant shoot development, including leaf pattern, inflorescence and floral meristem function, and seed development (Szakonyi et al., 2011 [28]). Affection of the development of the female gametophyte (Zsögön et al., 2014 [29]). |

|    |               |                      |                                                                                |                                                                                                                                                                                                                                                        |                                                                                                                                                                                                                                             |
|----|---------------|----------------------|--------------------------------------------------------------------------------|--------------------------------------------------------------------------------------------------------------------------------------------------------------------------------------------------------------------------------------------------------|---------------------------------------------------------------------------------------------------------------------------------------------------------------------------------------------------------------------------------------------|
| 24 | <i>RPL29e</i> | PGSC0003DMT400069847 | Ribosomal protein L29e                                                         | -                                                                                                                                                                                                                                                      | Osteogenesis delayed and fragility of adult bone increased (Oristian et al., 2009 [30]).                                                                                                                                                    |
| 25 | <i>RPL31</i>  | PGSC0003DMT400009481 | Ribosomal protein L31                                                          | -                                                                                                                                                                                                                                                      | Slow growth phenotype (Aseev et al., 2011 [31]).                                                                                                                                                                                            |
| 26 | <i>RPL34e</i> | PGSC0003DMT400080291 | Ribosomal protein L34e                                                         | -                                                                                                                                                                                                                                                      | -                                                                                                                                                                                                                                           |
| 27 | <i>RPL35</i>  | PGSC0003DMT400060449 | Ribosomal protein L35                                                          | -                                                                                                                                                                                                                                                      | Affectation of the development of the female gametophyte (Zsögön et al., 2014 [29]). Abnormal basal ribosome activity, abnormal transition from globular to heart stage of embryogenesis (Romani et al., 2012 [9]).                         |
| 28 | <i>RPL35</i>  | PGSC0003DMT400069913 | Ribosomal protein L35                                                          | -                                                                                                                                                                                                                                                      | -                                                                                                                                                                                                                                           |
| 29 | <i>RPL40</i>  | PGSC0003DMT400047686 | Ribosomal protein L40                                                          | Formation of a special cellular structure to facilitate prerRNA processing and ribosome assembly (Finley et al., 1989 [32]).                                                                                                                           | Embryo lethal (Tzafrir et al., 2004 [14]).                                                                                                                                                                                                  |
| 30 | <i>RPL40</i>  | PGSC0003DMT400000364 | Ribosomal protein L40                                                          | The covalent association of these RPs to ubiquitin could promote the formation of a special cellular structure to facilitate prerRNA processing and ribosome assembly (Finley et al., 1989 [32]).                                                      | Embryo lethal (Tzafrir et al., 2004 [14]).                                                                                                                                                                                                  |
| 31 | <i>ATARCA</i> | PGSC0003DMT400014419 | Transducin/WD40 repeat-like superfamily protein; Major component of the RACK1. | Key integrator and mediator of hormonal control of translation (Chen et al., 2006 [33]; Guo and Chen, 2008 [34]); connects heterotrimeric G protein with a MAPK cascade to form a unique signaling pathway in plant immunity (Cheng et al., 2015 [35]) | Pointed leaf phenotype and partial genetic redundancy of paralogs by complementation studies (Guo and Chen, 2008 [34]), AtRPL4D restored by sac52-d (AtRPL10A), sac53-d (AtRACK1A), sac56-d, and thermospermine (Takehi et al., 2015 [36]). |

|    |              |                      |                                    |                                                                                                                                                                                                                                                        |                                                                                                                                                                                                                                             |
|----|--------------|----------------------|------------------------------------|--------------------------------------------------------------------------------------------------------------------------------------------------------------------------------------------------------------------------------------------------------|---------------------------------------------------------------------------------------------------------------------------------------------------------------------------------------------------------------------------------------------|
| 32 | <i>RACK1</i> | PGSC0003DMT400074094 | Receptor for activated C kinase 1B | Key integrator and mediator of hormonal control of translation (Chen et al., 2006 [33]; Guo and Chen, 2008 [34]); connects heterotrimeric G protein with a MAPK cascade to form a unique signaling pathway in plant immunity (Cheng et al., 2015 [35]) | Pointed leaf phenotype and partial genetic redundancy of paralogs by complementation studies (Guo and Chen, 2008 [34]), AtRPL4D restored by sac52-d (AtRPL10A), sac53-d (AtRACK1A), sac56-d, and thermospermine (Takehi et al., 2015 [36]). |
|----|--------------|----------------------|------------------------------------|--------------------------------------------------------------------------------------------------------------------------------------------------------------------------------------------------------------------------------------------------------|---------------------------------------------------------------------------------------------------------------------------------------------------------------------------------------------------------------------------------------------|



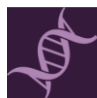

Upregulated Genes Related to Immunophylins and Associated function.

| N° | ID <i>A. thaliana</i> | ID <i>Solanum tuberosum</i> | Associated function                                        |
|----|-----------------------|-----------------------------|------------------------------------------------------------|
| 1  | <i>XYL1</i>           | PGSC0003DMT400037696        | Thermoinhibition resistant germination 1.                  |
| 2  | <i>PDIL2-2</i>        | PGSC0003DMT400001769        | Arabidopsis thaliana protein disulfide isomerase 10.       |
| 3  | <i>XYL1</i>           | PGSC0003DMT400041054        | Thermoinhibition resistant germination 1.                  |
| 4  | <i>CNX1</i>           | PGSC0003DMT400036920        | Calnexin homolog 1.                                        |
| 5  | <i>PDIL1-1</i>        | PGSC0003DMT400045299        | Arabidopsis thaliana protein disulfide isomerase 5.        |
| 6  | <i>Pnsl5</i>          | PGSC0003DMT400013412        | Peptidyl-prolyl cis-trans isomerase b (cyclophilin b).     |
| 7  | <i>PDIL1-2</i>        | PGSC0003DMT400036388        | Encodes a protein disulfide isomerase-like (PDIL) protein. |
| 8  | <i>CRT1b</i>          | PGSC0003DMT400007177        | Calreticulin 1b.                                           |
| 9  | <i>ROC3</i>           | PGSC0003DMT400004125        | Peptidyl-prolyl cis-trans isomerase CYP19-1.               |
| 10 | <i>FKBP12</i>         | PGSC0003DMT400083778        | Arabidopsis thaliana fk506-binding protein 12.             |
| 11 | <i>SOS3</i>           | PGSC0003DMT400023568        | Calcium-binding EF-hand family protein.                    |
| 12 | <i>ROC3</i>           | PGSC0003DMT400011344        | Peptidyl-prolyl cis-trans isomerase CYP19-1.               |

Upregulated Genes Related to Mitotic cell cycle and Associated function.

| N° | ID <i>A. thaliana</i> | ID <i>Solanum tuberosum</i> | Associated function                                              |
|----|-----------------------|-----------------------------|------------------------------------------------------------------|
| 1  | <i>AT3G42660</i>      | PGSC0003DMT400063296        | Transducin family protein / WD-40 repeat family protein.         |
| 2  | <i>EMB2656</i>        | PGSC0003DMT400034628        | ARM repeat superfamily protein; EMBRYO DEFECTIVE 2656 (EMB2656). |

|    |                  |                      |                                                               |
|----|------------------|----------------------|---------------------------------------------------------------|
| 3  | <i>AT3G57060</i> | PGSC0003DMT400076712 | Condensin complex subunit 1.                                  |
| 4  | <i>CYCA2;4</i>   | PGSC0003DMT400067117 | Cyclin A2;4 (CYCA2;4).                                        |
| 5  | <i>CYCA3;1</i>   | PGSC0003DMT400030222 | Putative cyclin-A3-1; Cyclin A3;1 (CYCA3;1).                  |
| 6  | <i>SYN3</i>      | PGSC0003DMT400065014 | Sister chromatid cohesion 1 protein 3.                        |
| 7  | <i>CYCA3;1</i>   | PGSC0003DMT400030176 | Putative cyclin-A3-1.                                         |
| 8  | <i>POLA2</i>     | PGSC0003DMT400044958 | DNA polymerase alpha subunit B.                               |
| 9  | <i>AT5G52220</i> | PGSC0003DMT400040416 | Conserved gene of unknown function.                           |
| 10 | <i>SMC3</i>      | PGSC0003DMT400003351 | Structural maintenance of chromosomes protein 4.              |
| 11 | <i>AT4G16970</i> | PGSC0003DMT400067513 | Protein kinase superfamily protein.                           |
| 12 | <i>CYCB2;3</i>   | PGSC0003DMT400003868 | Cyclin B2;3 (CYCB2;3).                                        |
| 13 | <i>CYC1BAT</i>   | PGSC0003DMT400015245 | G2/mitotic-specific cyclin-B.                                 |
| 14 | <i>CYCB2;4</i>   | PGSC0003DMT400025854 | G2/mitotic-specific cyclin-B.                                 |
| 15 | <i>MCM3</i>      | PGSC0003DMT400021420 | Minichromosome maintenance (MCM2/3/5) family protein.         |
| 16 | <i>AT1G07270</i> | PGSC0003DMT400078033 | Cell division control protein 6.                              |
| 17 | <i>MCM6</i>      | PGSC0003DMT400035464 | Minichromosome maintenance (MCM2/3/5) family protein.         |
| 18 | <i>CDC45</i>     | PGSC0003DMT400071831 | CDC45 (Cell division cycle 45)-like protein.                  |
| 19 | <i>AT2G20635</i> | PGSC0003DMT400082809 | ATP binding protein kinases protein serine/threonine kinases. |
| 20 | <i>AUR1</i>      | PGSC0003DMT400065470 | Serine/threonine-protein kinase Aurora-1.                     |
| 21 | <i>PPK1</i>      | PGSC0003DMT400074667 | Serine/threonine-protein kinase ttk/mps1.                     |
| 22 | <i>At1g03780</i> | PGSC0003DMT400056261 | Targeting protein for XKLP2.                                  |

|    |                  |                      |                                                                           |
|----|------------------|----------------------|---------------------------------------------------------------------------|
| 23 | <i>AT3G60660</i> | PGSC0003DMT400018071 | Spindle and kinetochore-associated protein 1 homolog.                     |
| 24 | <i>TUB8</i>      | PGSC0003DMT400053750 | Tubulin beta-8 chain.                                                     |
| 25 | <i>TUB8</i>      | PGSC0003DMT400037093 | Tubulin beta-8 chain.                                                     |
| 26 | <i>TUB8</i>      | PGSC0003DMT400078206 | Tubulin beta-8 chain.                                                     |
| 27 | <i>AT5G60930</i> | PGSC0003DMT400024240 | P-loop containing nucleoside triphosphate hydrolases superfamily protein. |
| 28 | <i>TUB8</i>      | PGSC0003DMT400028800 | Tubulin beta-8 chain.                                                     |
| 29 | <i>SGA2</i>      | PGSC0003DMT400078369 | Probable histone chaperone ASF1A.                                         |
| 30 | <i>CDT1A</i>     | PGSC0003DMT400028257 | Chromatin licensing and DNA replication factor 1.                         |
| 31 | <i>BUBR1</i>     | PGSC0003DMT400025922 | BUB1-related.                                                             |
| 32 | <i>Haspin</i>    | PGSC0003DMT400047135 | Serine/threonine-protein kinase haspin.                                   |
| 33 | <i>MAD2</i>      | PGSC0003DMT400045025 | Mitotic spindle checkpoint protein MAD2.                                  |
| 34 | <i>CYCA3;2</i>   | PGSC0003DMT400055428 | Cyclin-dependent protein kinase 3;2 (CYCA3;2).                            |
| 35 | <i>AT3G02820</i> | PGSC0003DMT400080556 | Zinc knuckle (CCHC-type) family protein.                                  |
| 36 | <i>AT4G15890</i> | PGSC0003DMT400011993 | Uncharacterized protein AT4g15890; Its function is described as binding.  |

#### Upregulated Genes Related to E2F activation and Associated function.

| Nº | ID <i>A. thaliana</i> | ID <i>Solanum tuberosum</i> | Associated function                      |
|----|-----------------------|-----------------------------|------------------------------------------|
| 1  | <i>ORC6</i>           | PGSC0003DMT400008733        | Origin of replication complex subunit 6. |
| 2  | <i>ORC4</i>           | PGSC0003DMT400078378        | Origin recognition complex subunit 4.    |

|    |               |                      |                                                              |
|----|---------------|----------------------|--------------------------------------------------------------|
| 3  | <i>ORC5</i>   | PGSC0003DMT400000500 | Origin recognition complex protein 5.                        |
| 4  | <i>CDT1a</i>  | PGSC0003DMT400028257 | Chromatin licensing and DNA replication factor 1.            |
| 5  | <i>SPT16</i>  | PGSC0003DMT400046987 | Global transcription factor C.                               |
| 6  | <i>TSO2</i>   | PGSC0003DMT400052217 | Ferritin/ribonucleotide reductase-like family protein.       |
| 7  | <i>MCM6</i>   | PGSC0003DMT400035464 | Minichromosome maintenance (MCM/3/5) family protein.         |
| 8  | <i>SMC3</i>   | PGSC0003DMT400003351 | Structural maintenance of chromosomes protein 4.             |
| 9  | <i>MCM2</i>   | PGSC0003DMT400005594 | Minichromosome maintenance (MCM/3/5) family protein.         |
| 10 | <i>RNR1</i>   | PGSC0003DMT400060658 | Ribonucleoside-diphosphate reductase large subunit.          |
| 11 | <i>CHR11</i>  | PGSC0003DMT400040011 | ISWI chromatin-remodeling complex ATPase CHR11.              |
| 12 | <i>POLA2</i>  | PGSC0003DMT400044958 | DNA polymerase alpha subunit B.                              |
| 13 | <i>PSF2</i>   | PGSC0003DMT400060503 | DNA replication complex GINS protein PSF2.                   |
| 14 | <i>CHR1</i>   | PGSC0003DMT400038561 | ATP-dependent DNA helicase DDM1.                             |
| 15 | <i>TOPII</i>  | PGSC0003DMT400017488 | DNA topoisomerase 2.                                         |
| 16 | <i>RPA2</i>   | PGSC0003DMT400035809 | Replication protein A 32 kDa subunit A.                      |
| 17 | <i>RPA70B</i> | PGSC0003DMT400063329 | Replication protein A 70 kDa DNA-binding subunit B.          |
| 18 | <i>MCM5</i>   | PGSC0003DMT400030898 | Minichromosome maintenance (MCM2/3/5) family protein.        |
| 19 | <i>RECQL1</i> | PGSC0003DMT400007294 | ATP-dependent DNA helicase Q-like 1.                         |
| 20 | <i>ATIM</i>   | PGSC0003DMT400016842 | Timeless family protein.                                     |
| 21 | <i>MCM4</i>   | PGSC0003DMT400079535 | Minichromosome maintenance (MCM/3/5) family protein.         |
| 22 | <i>THY-1</i>  | PGSC0003DMT400001937 | Bifunctional dihydrofolate reductase-thymidylate synthase 1. |

|    |              |                      |                                                       |
|----|--------------|----------------------|-------------------------------------------------------|
| 23 | <i>PHR2</i>  | PGSC0003DMT400081378 | Photolyase/blue-light receptor 2.                     |
| 24 | <i>TIM</i>   | PGSC0003DMT400080556 | Triosephosphate isomerase, chloroplastic.             |
| 25 | <i>SYN3</i>  | PGSC0003DMT400065014 | Sister chromatid cohesion 1 protein 3.                |
| 26 | <i>BRCA1</i> | PGSC0003DMT400023253 | Arabidopsis thaliana breast cancer susceptibility1.   |
| 27 | <i>PCNA2</i> | PGSC0003DMT400078207 | Proliferating cell nuclear antigen 2.                 |
| 28 | <i>MCM3</i>  | PGSC0003DMT400021420 | Minichromosome maintenance (MCM2/3/5) family protein. |
| 29 | <i>CDC6</i>  | PGSC0003DMT400078033 | Cell division control protein 6.                      |
| 30 | <i>CDC45</i> | PGSC0003DMT400071831 | CDC45 (Cell division cycle 45)-like protein.          |
| 31 | <i>POLA3</i> | PGSC0003DMT400032030 | DNA primases; POLA3.                                  |

Upregulated Genes Related to Cytoskeleton and Associated function.

| N° | ID <i>A. thaliana</i> | ID <i>Solanum tuberosum</i> | Associated function                                         |
|----|-----------------------|-----------------------------|-------------------------------------------------------------|
| 1  | <i>AIR9</i>           | PGSC0003DMT400054558        | Outer arm dynein light chain 1 protein.                     |
| 2  | <i>AT3G27640</i>      | PGSC0003DMT400032878        | Transducin/WD40 repeat-like superfamily protein.            |
| 3  | <i>AT4G02110</i>      | PGSC0003DMT400023253        | BRCT domain-containing protein At4g02110.                   |
| 4  | <i>AT4G16970</i>      | PGSC0003DMT400067513        | Protein kinase superfamily protein.                         |
| 5  | <i>BUBR1</i>          | PGSC0003DMT400025922        | BUB1-related (BUB1: budding uninhibited by benzimidazol 1). |
| 6  | <i>TUB8</i>           | PGSC0003DMT400053750        | Tubulin beta-8 chain.                                       |
| 7  | <i>Haspin</i>         | PGSC0003DMT400047135        | Serine/threonine-protein kinase haspin.                     |
| 8  | <i>TUB8</i>           | PGSC0003DMT400078206        | Tubulin beta-8 chain.                                       |

|    |                  |                      |                                                                           |
|----|------------------|----------------------|---------------------------------------------------------------------------|
| 9  | <i>TUB8</i>      | PGSC0003DMT400037093 | Tubulin beta-8 chain.                                                     |
| 10 | <i>EB1C</i>      | PGSC0003DMT400064236 | Microtubule-associated protein RP/EB family member 1C.                    |
| 11 | <i>TUB8</i>      | PGSC0003DMT400028800 | Tubulin beta-8 chain.                                                     |
| 12 | <i>AT3G60660</i> | PGSC0003DMT400018071 | Spindle and kinetochore-associated protein 1 homolog.                     |
| 13 | <i>AUR1</i>      | PGSC0003DMT400065470 | Serine/threonine-protein kinase Aurora-1.                                 |
| 14 | <i>AT5G60930</i> | PGSC0003DMT400024240 | P-loop containing nucleoside triphosphate hydrolases superfamily protein. |
| 15 | <i>AT2G36200</i> | PGSC0003DMT400023094 | P-loop containing nucleoside triphosphate hydrolases superfamily protein. |
| 16 | <i>AT4G21820</i> | PGSC0003DMT400042507 | Its function is described as calmodulin binding. Located in chloroplast.  |
| 17 | <i>PPK1</i>      | PGSC0003DMT400074667 | Serine/threonine-protein kinase ttk/mps1.                                 |
| 18 | <i>AT3G45850</i> | PGSC0003DMT400040181 | P-loop containing nucleoside triphosphate hydrolases superfamily protein. |
| 19 | <i>MAP65-1</i>   | PGSC0003DMT400033471 | 65-kDa microtubule-associated protein 1.                                  |
| 20 | <i>PLE</i>       | PGSC0003DMT400070431 | Microtubule associated protein (MAP65/ASE1) family protein.               |
| 21 | <i>AT3G45850</i> | PGSC0003DMT400005133 | P-loop containing nucleoside triphosphate hydrolases superfamily protein. |
| 22 | <i>MAP65-5</i>   | PGSC0003DMT400008510 | Microtubule-associated protein 65-5.                                      |
| 23 | <i>At1g03780</i> | PGSC0003DMT400056261 | Targeting protein for XKLP2.                                              |
| 24 | <i>MAP65-5</i>   | PGSC0003DMT400057428 | Microtubule-associated protein 65-5.                                      |
| 25 | <i>AT3G45850</i> | PGSC0003DMT400078142 | P-loop containing nucleoside triphosphate hydrolases superfamily protein. |

## Upregulated Genes Related to Motor proteins and Associated function.

| N° | ID <i>A. thaliana</i> | ID <i>Solanum tuberosum</i> | Associated function                                                       |
|----|-----------------------|-----------------------------|---------------------------------------------------------------------------|
| 1  | AT3G45850             | PGSC0003DMT400078142        | P-loop containing nucleoside triphosphate hydrolases superfamily protein. |
| 2  | AT5G60930             | PGSC0003DMT400024240        | P-loop containing nucleoside triphosphate hydrolases superfamily protein. |
| 3  | AT2G36200             | PGSC0003DMT400023094        | P-loop containing nucleoside triphosphate hydrolases superfamily protein. |
| 4  | AT3G45850             | PGSC0003DMT400040181        | P-loop containing nucleoside triphosphate hydrolases superfamily protein. |
| 5  | AT3G45850             | PGSC0003DMT400005133        | P-loop containing nucleoside triphosphate hydrolases superfamily protein. |

## Upregulated Genes Related to Methylation and Associated function.

| N° | ID <i>A. thaliana</i> | ID <i>Solanum tuberosum</i> | Associated function                                                              |
|----|-----------------------|-----------------------------|----------------------------------------------------------------------------------|
| 1  | UPM1                  | PGSC0003DMT400065013        | Uroporphyrin-iii c-methyltransferase.                                            |
| 2  | AT4G03130             | PGSC0003DMT400056558        | BRCT domain-containing DNA repair protein.                                       |
| 3  | AT2G41450             | PGSC0003DMT400033151        | N-acetyltransferases; Its function is described as N-acetyltransferase activity. |
| 4  | VIM1                  | PGSC0003DMT400084297        | Zinc finger (C3HC4-type RING finger) family protein.                             |
| 5  | MET1                  | PGSC0003DMT400079464        | DNA (cytosine-5)-methyltransferase 1.                                            |
| 6  | CMT3                  | PGSC0003DMT400010941        | DNA (cytosine-5)-methyltransferase CMT3.                                         |
| 7  | CYP51G1               | PGSC0003DMT400042257        | Sterol 14alpha-demethylase. Involved in sterol biosynthesis.                     |
| 8  | SMT1                  | PGSC0003DMT400017668        | Cycloartenol-C-24-methyltransferase.                                             |

|    |               |                      |                                                                           |
|----|---------------|----------------------|---------------------------------------------------------------------------|
| 9  | <i>APG1</i>   | PGSC0003DMT400049690 | S-adenosyl-L-methionine-dependent methyltransferases superfamily protein. |
| 10 | <i>G-TMT</i>  | PGSC0003DMT400006168 | Tocopherol O-methyltransferase, chloroplastic.                            |
| 11 | <i>SMT2</i>   | PGSC0003DMT400047969 | 24-methylenesterol C-methyltransferase 2.                                 |
| 12 | <i>PMEAMT</i> | PGSC0003DMT400014749 | S-adenosyl-L-methionine-dependent methyltransferases superfamily protein. |
| 13 | <i>THY-1</i>  | PGSC0003DMT400001937 | Bifunctional dihydrofolate reductase-thymidylate synthase 1.              |

#### Upregulated Genes Related to Histone binding and Associated function.

| N° | ID <i>A. thaliana</i> | ID <i>Solanum tuberosum</i> | Associated function                                                                                                           |
|----|-----------------------|-----------------------------|-------------------------------------------------------------------------------------------------------------------------------|
| 1  | <i>AT3G57060</i>      | PGSC0003DMT400056558        | Condensin complex subunit 1.                                                                                                  |
| 2  | <i>SGA2</i>           | PGSC0003DMT400078369        | Probable histone chaperone ASF1A.                                                                                             |
| 3  | <i>SPT16</i>          | PGSC0003DMT400046987        | Global transcription factor C; Component of the FACT complex, a general chromatin factor that acts to reorganize nucleosomes. |
| 4  | <i>VIM1</i>           | PGSC0003DMT400084297        | Zinc finger (C3HC4-type RING finger) family protein.                                                                          |
| 5  | <i>AT4G15890</i>      | PGSC0003DMT400011993        | Uncharacterized protein AT4g15890.                                                                                            |

#### Upregulated Genes Related to Sterol biosynthetic process and terpenoid backbone biosynthesis and Associated function.

| N° | ID <i>A. thaliana</i> | ID <i>Solanum tuberosum</i> | Associated function                                                       |
|----|-----------------------|-----------------------------|---------------------------------------------------------------------------|
| 1  | <i>APG1</i>           | PGSC0003DMT400049690        | S-adenosyl-L-methionine-dependent methyltransferases superfamily protein. |



|    |                  |                      |                                                                           |
|----|------------------|----------------------|---------------------------------------------------------------------------|
| 2  | <i>G-TMT</i>     | PGSC0003DMT400006168 | Tocopherol O-methyltransferase, chloroplastic.                            |
| 3  | <i>VTE5</i>      | PGSC0003DMT400043567 | Phytol kinase 1, chloroplastic.                                           |
| 4  | <i>BAS</i>       | PGSC0003DMT400048796 | Terpenoid cyclases family protein; Converts oxidosqualene to beta-amyrin. |
| 5  | <i>RTNLB19</i>   | PGSC0003DMT400018853 | Plant 3beta-hydroxysteroid-4alpha-carboxylate 3-dehydrogenase.            |
| 6  | <i>CYP51G1</i>   | PGSC0003DMT400042257 | Sterol 14alpha-demethylase.                                               |
| 7  | <i>SMT1</i>      | PGSC0003DMT400017668 | Cycloartenol-C-24-methyltransferase.                                      |
| 8  | <i>DWF1</i>      | PGSC0003DMT400054476 | Cell elongation protein / DWARF1 / DIMINUTO (DIM).                        |
| 9  | <i>HYD1</i>      | PGSC0003DMT400071184 | Probable 3-beta-hydroxysteroid-Delta(8), Delta(7)-isomerase.              |
| 10 | <i>FK</i>        | PGSC0003DMT400007043 | Ergosterol biosynthesis ERG4/ERG24 family.                                |
| 11 | <i>SMT2</i>      | PGSC0003DMT400047969 | 24-methylenesterol C-methyltransferase 2.                                 |
| 12 | <i>CPI1</i>      | PGSC0003DMT400011907 | Cycloeucalenol cycloisomerase.                                            |
| 13 | <i>SMO1-1</i>    | PGSC0003DMT400033236 | Plant 4,4-dimethylsterol c-4alpha-methyl-monooxygenase.                   |
| 14 | <i>STE1</i>      | PGSC0003DMT400067881 | Delta(7)-sterol-C5(6)-desaturase 1.                                       |
| 15 | <i>AT4G00560</i> | PGSC0003DMT400000064 | NAD(P)-binding Rossmann-fold superfamily protein.                         |
| 16 | <i>SMO2-1</i>    | PGSC0003DMT400005519 | Sterol 4-alpha-methyl oxidase<br>1                                        |

## Upregulated Genes Related to Amino sugar and nucleotide sugar metabolism and Associated function.

| N° | ID <i>A. thaliana</i> | ID <i>Solanum tuberosum</i> | Associated function                                       |
|----|-----------------------|-----------------------------|-----------------------------------------------------------|
| 1  | <i>CYT1</i>           | PGSC0003DMT400022961        | Glucose-1-phosphate adenylyltransferase family protein.   |
| 2  | <i>GME</i>            | PGSC0003DMT400050094        | GDP-D-mannose 3',5'-epimerase.                            |
| 3  | <i>UGD2</i>           | PGSC0003DMT400087395        | UDP-glucose 6-dehydrogenase family protein.               |
| 4  | <i>RHM1</i>           | PGSC0003DMT400018192        | Rhamnose biosynthesis 1.                                  |
| 5  | <i>NRS/ER</i>         | PGSC0003DMT400058533        | UDP-4-KETO-6-DEOXY-D-GLUCOSE-3,5-EPIMERASE-4-REDUCTASE 1. |
| 6  | <i>UGP2</i>           | PGSC0003DMT400034699        | UTP-glucose-1-phosphate uridylyltransferase 1.            |
| 7  | <i>UGD2</i>           | PGSC0003DMT400003666        | UDP-glucose 6-dehydrogenase family protein.               |

## Upregulated Genes Related to Sulfur metabolism and Associated function.

| N° | ID <i>A. thaliana</i> | ID <i>Solanum tuberosum</i> | Associated function                                           |
|----|-----------------------|-----------------------------|---------------------------------------------------------------|
| 1  | <i>APS1</i>           | PGSC0003DMT400048741        | 3'-phosphoadenosine 5'-phosphosulfate synthase.               |
| 2  | <i>APK</i>            | PGSC0003DMT400055243        | ADENOSINE-5'-PHOSPHOSULFATE (APS) KINASE 1.                   |
| 3  | <i>HL</i>             | PGSC0003DMT400022081        | 3'(2'), 5'-bisphosphate nucleotidase.                         |
| 4  | <i>APR1</i>           | PGSC0003DMT400042488        | 5'-adenylylsulfate reductase 1, chloroplastic.                |
| 5  | <i>APR3</i>           | PGSC0003DMT400051168        | 5'-adenylylsulfate reductase 3, chloroplastic.                |
| 6  | <i>CYSC1</i>          | PGSC0003DMT400000156        | Bifunctional L-3-cyanoalanine synthase/ cysteine synthase C1. |

|   |                 |                      |                                                   |
|---|-----------------|----------------------|---------------------------------------------------|
| 7 | <i>SERAT2;2</i> | PGSC0003DMT400037270 | Serine acetyltransferase 3, mitochondrial.        |
| 8 | <i>OASA1</i>    | PGSC0003DMT400082113 | O-acetylserine (thiol) lyase (oas-tl) isoform a1. |

Upregulated Genes Related to Disulfide isomerase activity and Associated function.

| N° | ID <i>A. thaliana</i> | ID <i>Solanum tuberosum</i> | Associated function                                                                                                                 |
|----|-----------------------|-----------------------------|-------------------------------------------------------------------------------------------------------------------------------------|
| 1  | <i>AT3G42660</i>      | PGSC0003DMT400063296        | Transducin family protein / WD-40 repeat family protein.                                                                            |
| 2  | <i>CNX1</i>           | PGSC0003DMT400036920        | Calnexin homolog 1.                                                                                                                 |
| 3  | <i>PDIL1-1</i>        | PGSC0003DMT400045299        | Arabidopsis thaliana protein disulfide isomerase 5.                                                                                 |
| 4  | <i>CRT1b</i>          | PGSC0003DMT400007177        | Calreticulin 1b.                                                                                                                    |
| 5  | <i>PDIL1-2</i>        | PGSC0003DMT400036388        | Encodes a protein disulfide isomerase-like (PDIL) protein, a member of a multigene family within the thioredoxin (TRX) superfamily. |

Upregulated Genes Related to DNA replication and Associated function

| N° | ID <i>A. thaliana</i> | ID <i>Solanum tuberosum</i> | Associated function                                  |
|----|-----------------------|-----------------------------|------------------------------------------------------|
| 1  | <i>PDIL2-2</i>        | PGSC0003DMT400001769        | Arabidopsis thaliana protein disulfide isomerase 10. |
| 2  | <i>RNR1</i>           | PGSC0003DMT400060658        | Ribonucleoside-diphosphate reductase large subunit.  |
| 3  | <i>RECQL1</i>         | PGSC0003DMT400007294        | ATP-dependent DNA helicase Q-like 1.                 |
| 4  | <i>ETG1</i>           | PGSC0003DMT400062461        | Mini-chromosome maintenance complex-binding protein. |
| 5  | <i>PCNA2</i>          | PGSC0003DMT400078207        | Proliferating cell nuclear antigen 2.                |

|    |                  |                      |                                                        |
|----|------------------|----------------------|--------------------------------------------------------|
| 6  | <i>AT4G18590</i> | PGSC0003DMT400022900 | Nucleic acid-binding, OB-fold-like protein.            |
| 7  | <i>TSO2</i>      | PGSC0003DMT400052217 | Ferritin/ribonucleotide reductase-like family protein. |
| 8  | <i>RPA2</i>      | PGSC0003DMT400035809 | Replication protein A 32 kDa subunit A.                |
| 9  | <i>AT3G02820</i> | PGSC0003DMT400080556 | Zinc knuckle (CCHC-type) family protein.               |
| 10 | <i>AT4G16970</i> | PGSC0003DMT400067513 | Protein kinase superfamily protein.                    |
| 11 | <i>AT1G07270</i> | PGSC0003DMT400078033 | Cell division control protein 6.                       |
| 12 | <i>POLA2</i>     | PGSC0003DMT400044958 | DNA polymerase alpha subunit B.                        |
| 13 | <i>MCM3</i>      | PGSC0003DMT400021420 | Minichromosome maintenance (MCM2/3/5) family protein.  |
| 14 | <i>DPB2</i>      | PGSC0003DMT400079711 | Dna polymerase epsilon subunit 2.                      |
| 15 | <i>MCM10</i>     | PGSC0003DMT400015838 | Minichromosome maintenance protein 10.                 |
| 16 | <i>POLA3</i>     | PGSC0003DMT400032030 | DNA primases.                                          |
| 17 | <i>MCM6</i>      | PGSC0003DMT400035464 | Minichromosome maintenance (mcm2/3/5) family protein.  |
| 18 | <i>RPA70B</i>    | PGSC0003DMT400063329 | Replication protein A 70 kDa DNA-binding subunit B.    |
| 19 | <i>CDC45</i>     | PGSC0003DMT400071831 | CDC45 (Cell division cycle 45)-like protein.           |
| 20 | <i>MCM4</i>      | PGSC0003DMT400079535 | Minichromosome maintenance (mcm2/3/5) family protein.  |
| 21 | <i>SPT16</i>     | PGSC0003DMT400046987 | Global transcription factor C.                         |
| 22 | <i>AT3G27640</i> | PGSC0003DMT400032878 | Transducin/WD40 repeat-like superfamily protein.       |
| 23 | <i>ORC5</i>      | PGSC0003DMT400000500 | Origin recognition complex protein 5.                  |
| 24 | <i>ORC6</i>      | PGSC0003DMT400008733 | Origin of replication complex subunit 6.               |
| 25 | <i>CDT1A</i>     | PGSC0003DMT400028257 | Chromatin licensing and DNA replication factor 1.      |

|    |                  |                      |                                                       |
|----|------------------|----------------------|-------------------------------------------------------|
| 26 | <i>ORC4</i>      | PGSC0003DMT400078378 | Origin recognition complex subunit 4.                 |
| 27 | <i>MCM5</i>      | PGSC0003DMT400030898 | Minichromosome maintenance (MCM2/3/5) family protein. |
| 28 | <i>MCM2</i>      | PGSC0003DMT400005594 | Minichromosome maintenance (mcm2/3/5) family protein. |
| 29 | <i>PSF2</i>      | PGSC0003DMT400060503 | DNA replication complex GINS protein PSF2.            |
| 30 | <i>PRL</i>       | PGSC0003DMT400023333 | Minichromosome maintenance (MCM2/3/5) family protein. |
| 31 | <i>AT3G55490</i> | PGSC0003DMT400078521 | Dna replication complex gins protein psf3-like.       |
| 32 | <i>DEL1</i>      | PGSC0003DMT400062857 | E2F transcription factor-like E2FE.                   |

Primer design of DEG used to validate the genome-wide analysis of MTs development of potato *S. tuberosum* cv. Alpha.

| Gen ID         | Sequences                  | ID NCBI        |
|----------------|----------------------------|----------------|
| <i>UBQ1</i>    | L: GCTTCGTGGAGGGATTATTGA   | XM_006339693.1 |
|                | R: GAGGATGTAGGCGAGCATAAC   |                |
| <i>FKBP12</i>  | L: GGGAGTGGAGAAGGAAGTTATC  | XM_006351679.2 |
|                | R: GGTCTCTATCTTTCCCGTAACC  |                |
| <i>RPL29</i>   | L: AATCAGTCGTACAAGGCTCAC   | XM_015312492.1 |
|                | R: GCATACCTCTGGTTCCTCAAG   |                |
| <i>RPL11</i>   | L: GAGAAGCTGCCGATCTTAAT    | XM_006343698.2 |
|                | R: TCGGAGGGTCAATGTCAATTC   |                |
| <i>PRXQ</i>    | L: ATGGCTTCTCTATCCGTCTCT   | XM_006353712.2 |
|                | R: CTGGAGACAATGGTGAGGTTT   |                |
| <i>PCNA2</i>   | L: CTACGTCTTGTTCAAGGAAGTC  | XM_006350753.2 |
|                | R: ATGGCTTGCAAGAGAGAATCC   |                |
| <i>SWI/SNF</i> | L: GTGTTGCTGCACCTGTAAATC   | XM_006356044.2 |
|                | R: CACCGAGTGGTGAATGTAGAA   |                |
| <i>TSO2</i>    | L: ACCTAACATCCGGTGAAAGAC   | XM_006338637.2 |
|                | R: GGCGATTGGAACCCATAGA     |                |
| <i>BRCA1</i>   | L: CGGTGTGCAAAGTTCCATTTC   | XM_006354922.2 |
|                | R: TTGACTCCTGAAGCGATTTC    |                |
| <i>RNR1</i>    | L: GAGTAACCGTGACGAGTGTATG  | XM_006346669.2 |
|                | R: CAGCAGGCATGGAGAGATAAA   |                |
| <i>THY-1</i>   | L: GTGCTAAGGTCCTACAAGAGAAG | XM_006365063.2 |
|                | R: CCAAATCACCTCTTCCCTATC   |                |
| <i>E2F3</i>    | L: CCTGAGGATTACCACCGATTT   | XM_006348424.2 |
|                | R: ATAGCCTGTCTTCCGCTTTAG   |                |
| <i>LOG10</i>   | L: GGCGGGTTCAAGATAGGTAAG   | XM_006346105.2 |
|                | R: CTACATCTCACAACAGCATCCA  |                |

|                               |                          |                |
|-------------------------------|--------------------------|----------------|
| <i>EF<math>\alpha</math>1</i> | L: TTTGGCCCTACTGGTTTGAC  | NM_001288491.1 |
|                               | R: GCACTGGAGCATATCCGTTT  |                |
| <i>SEC3</i>                   | L: GCTTGCACACGCCATATCAAT | XM_006342542.2 |
|                               | R: TGGATTTTACCACCTTCCGCA |                |

## References

- Chen, G.-H.; Liu, M.-J.; Xiong, Y.; Sheen, J.; Wu, S.-H. TOR and RPS6 Transmit Light Signals to Enhance Protein Translation in Deetioliating *Arabidopsis* Seedlings. *Proc. Natl. Acad. Sci. U.S.A.* **2018**, *115* (50), 12823–12828. <https://doi.org/10.1073/pnas.1809526115>.
- Kim, Y.-K.; Kim, S.; Shin, Y.; Hur, Y.-S.; Kim, W.-Y.; Lee, M.-S.; Cheon, C.-I.; Verma, D. P. S. Ribosomal Protein S6, a Target of Rapamycin, Is Involved in the Regulation of RRNA Genes by Possible Epigenetic Changes in *Arabidopsis*. *Journal of Biological Chemistry* **2014**, *289* (7), 3901–3912. <https://doi.org/10.1074/jbc.M113.515015>.
- Tzafrir, I. The *Arabidopsis* SeedGenes Project. *Nucleic Acids Research* **2003**, *31* (1), 90–93. <https://doi.org/10.1093/nar/gkg028>.
- Wang, R.; Zhao, J.; Jia, M.; Xu, N.; Liang, S.; Shao, J.; Qi, Y.; Liu, X.; An, L.; Yu, F. Balance between Cytosolic and Chloroplast Translation Affects Leaf Variegation. *Plant Physiol.* **2018**, *176* (1), 804–818. <https://doi.org/10.1104/pp.17.00673>.
- Creff, A.; Sormani, R.; Desnos, T. The Two *Arabidopsis* RPS6 Genes, Encoding for Cytoplasmic Ribosomal Proteins S6, Are Functionally Equivalent. *Plant Mol Biol* **2010**, *73* (4–5), 533–546. <https://doi.org/10.1007/s11103-010-9639-y>.
- Sun, L.; Yu, Y.; Hu, W.; Min, Q.; Kang, H.; Li, Y.; Hong, Y.; Wang, X.; Hong, Y. Ribosomal Protein S6 Kinase1 Coordinates with TOR-Raptor2 to Regulate Thylakoid Membrane Biosynthesis in Rice. *Biochimica et Biophysica Acta (BBA) - Molecular and Cell Biology of Lipids* **2016**, *1861* (7), 639–649. <https://doi.org/10.1016/j.bbalip.2016.04.009>.
- Kim, K.-Y. Molecular Cloning of Low-Temperature-Inducible Ribosomal Proteins from Soybean. *Journal of Experimental Botany* **2004**, *55* (399), 1153–1155. <https://doi.org/10.1093/jxb/erh125>.
- Ito, T.; Kim, G.-T.; Shinozaki, K. Disruption of an *Arabidopsis* Cytoplasmic Ribosomal Protein S13-Homologous Gene by Transposon-Mediated Mutagenesis Causes Aberrant Growth and Development. *Plant J* **2000**, *22* (3), 257–264. <https://doi.org/10.1046/j.1365-313x.2000.00728.x>.
- Romani, I.; Tadini, L.; Rossi, F.; Masiero, S.; Pribil, M.; Jahns, P.; Kater, M.; Leister, D.; Pesaresi, P. Versatile Roles of *Arabidopsis* Plastid Ribosomal Proteins in Plant Growth and Development: Different Functions of Plastid Ribosome Subunits. *The Plant Journal* **2012**, *72* (6), 922–934. <https://doi.org/10.1111/tpj.12000>.
- Szick-Miranda, K.; Zaniel, A. S.; Zaniel, A. S.; Abidayo, S.; Slater, K. L. C. Analysis of RPS15aE, an Isoform of a Plant-Specific Evolutionarily Distinct Ribosomal Protein in *Arabidopsis thaliana*, Reveals Its Potential Role as a Growth Regulator. *Plant Mol Biol Rep* **2010**, *28* (2), 239–252. <https://doi.org/10.1007/s11105-009-0148-6>.
- Lu, C.; Xie, Z.; Yu, F.; Tian, L.; Hao, X.; Wang, X.; Chen, L.; Li, D. Mitochondrial Ribosomal Protein S9M Is Involved in Male Gametogenesis and Seed Development in *Arabidopsis*. *Plant Biol J* **2020**, *22* (4), 655–667. <https://doi.org/10.1111/plb.13108>.
- Ma, Z.; Dooner, H. K. A Mutation in the Nuclear-Encoded Plastid Ribosomal Protein S9 Leads to Early Embryo Lethality in Maize. *The Plant Journal* **2004**, *37* (1), 92–103. <https://doi.org/10.1046/j.1365-313X.2003.01942.x>.

13. Qiu, Z.; Chen, D.; He, L.; Zhang, S.; Yang, Z.; Zhang, Y.; Wang, Z.; Ren, D.; Qian, Q.; Guo, L.; Zhu, L. The Rice White Green Leaf 2 Gene Causes Defects in Chloroplast Development and Affects the Plastid Ribosomal Protein S9. *Rice* **2018**, *11* (1), 39. <https://doi.org/10.1186/s12284-018-0233-2>.
14. Tzafrir, I.; Pena-Muralla, R.; Dickerman, A.; Berg, M.; Rogers, R.; Hutchens, S.; Sweeney, T. C.; McElver, J.; Aux, G.; Patton, D.; Meinke, D. Identification of Genes Required for Embryo Development in Arabidopsis. *Plant Physiology* **2004**, *135* (3), 1206–1220. <https://doi.org/10.1104/pp.104.045179>.
15. Schultes, N. P.; Sawers, R. J. H.; Brutnell, T. P.; Krueger, R. W. Maize High Chlorophyll Fluorescent 60 Mutation Is Caused by an Ac Disruption of the Gene Encoding the Chloroplast Ribosomal Small Subunit Protein 17. *Plant J* **2000**, *21* (4), 317–327. <https://doi.org/10.1046/j.1365-313x.2000.00676.x>.
16. Chan, Y. L.; Paz, V.; Olvera, J.; Wool, I. G. The Primary Structure of L37 - a Rat Ribosomal Protein with a Zinc Finger-like Motif. *Biochemical and Biophysical Research Communications* **1993**, *192* (2), 590–596. <https://doi.org/10.1006/bbrc.1993.1456>.
17. Finkelshtein, A.; Khamesa, H.; Tuan, L. A.; Rabanim, M.; Chamovitz, D. A. Overexpression of the Ribosomal S30 Subunit Leads to Indole-3-carbinol Tolerance in *Arabidopsis Thaliana*. *Plant J* **2021**, *105* (3), 668–677. <https://doi.org/10.1111/tpj.15062>.
18. Nagaraj, S.; Senthil-Kumar, M.; Ramu, V. S.; Wang, K.; Mysore, K. S. Plant Ribosomal Proteins, RPL12 and RPL19, Play a Role in Nonhost Disease Resistance against Bacterial Pathogens. *Front. Plant Sci.* **2016**, *6*. <https://doi.org/10.3389/fpls.2015.01192>.
19. Zhao, D.; Zhang, C.; Li, Q.; Yang, Q.; Gu, M.; Liu, Q. A Residue Substitution in the Plastid Ribosomal Protein L12/AL1 Produces Defective Plastid Ribosome and Causes Early Seedling Lethality in Rice. *Plant Mol Biol* **2016**, *91* (1–2), 161–177. <https://doi.org/10.1007/s11103-016-0453-z>.
20. Yang, L.; Xie, C.; Li, W.; Zhang, R.; Jue, D.; Yang, Q. Expression of a Wild Eggplant Ribosomal Protein L13a in Potato Enhances Resistance to *Verticillium Dahliae*. *Plant Cell Tiss Organ Cult* **2013**, *115* (3), 329–340. <https://doi.org/10.1007/s11240-013-0365-4>.
21. Song, J.; Wei, X.; Shao, G.; Sheng, Z.; Chen, D.; Liu, C.; Jiao, G.; Xie, L.; Tang, S.; Hu, P. The Rice Nuclear Gene WLP1 Encoding a Chloroplast Ribosome L13 Protein Is Needed for Chloroplast Development in Rice Grown under Low Temperature Conditions. *Plant Mol Biol* **2014**, *84* (3), 301–314. <https://doi.org/10.1007/s11103-013-0134-0>.
22. Lee, J.; Jang, S.; Ryu, S.; Lee, S.; Park, J.; Lee, S.; An, G.; Park, S. K. Mutation of Plastid Ribosomal Protein L13 Results in an Albino Seedling-Lethal Phenotype in Rice. *Plant Breed. Biotech.* **2019**, *7* (4), 395–404. <https://doi.org/10.9787/PBB.2019.7.4.395>.
23. Zhang, H.; Luo, M.; Day, R. C.; Talbot, M. J.; Ivanova, A.; Ashton, A. R.; Chaudhury, A. M.; Macknight, R. C.; Hrmova, M.; Koltunow, A. M. Developmentally Regulated *HEART STOPPER*, a Mitochondrially Targeted L18 Ribosomal Protein Gene, Is Required for Cell Division, Differentiation, and Seed Development in *Arabidopsis*. *EXBOTJ* **2015**, *66* (19), 5867–5880. <https://doi.org/10.1093/jxb/erv296>.
24. Yan, H.; Chen, D.; Wang, Y.; Sun, Y.; Zhao, J.; Sun, M.; Peng, X. Ribosomal Protein L18aB Is Required for Both Male Gametophyte Function and Embryo Development in Arabidopsis. *Sci Rep* **2016**, *6* (1), 31195. <https://doi.org/10.1038/srep31195>.
25. Nishimura, T.; Wada, T.; Yamamoto, K. T.; Okada, K. The *Arabidopsis* STV1 Protein, Responsible for Translation Reinitiation, Is Required for Auxin-Mediated Gynoecium Patterning. *The Plant Cell* **2005**, *17* (11), 2940–2953. <https://doi.org/10.1105/tpc.105.036533>.

- 
26. Li, S.; Liu, K.; Zhang, S.; Wang, X.; Rogers, K.; Ren, G.; Zhang, C.; Yu, B. STV1, a Ribosomal Protein, Binds Primary MicroRNA Transcripts to Promote Their Interaction with the Processing Complex in *Arabidopsis*. *Proc. Natl. Acad. Sci. U.S.A.* **2017**, *114* (6), 1424–1429. <https://doi.org/10.1073/pnas.1613069114>.
  27. Park, S.-H.; Chung, M.-S.; Lee, S.; Lee, K.-H.; Kim, C. S. Loss of Ribosomal Protein L24A (RPL24A) Suppresses Proline Accumulation of *Arabidopsis Thaliana* Ring Zinc Finger 1 (*Atrzf1*) Mutant in Response to Osmotic Stress. *Biochemical and Biophysical Research Communications* **2017**, *494* (3–4), 499–503. <https://doi.org/10.1016/j.bbrc.2017.10.092>.
  28. Szakonyi, D.; Byrne, M. E. Ribosomal Protein L27a Is Required for Growth and Patterning in *Arabidopsis Thaliana*: Ribosomal Protein-Mediated Patterning. *The Plant Journal* **2011**, *65* (2), 269–281. <https://doi.org/10.1111/j.1365-313X.2010.04422.x>.
  29. Zsögön, A.; Szakonyi, D.; Shi, X.; Byrne, M. E. Ribosomal Protein RPL27a Promotes Female Gametophyte Development in a Dose-Dependent Manner. *Plant Physiology* **2014**, *165* (3), 1133–1143. <https://doi.org/10.1104/pp.114.241778>.
  30. Oristian, D. S.; Sloofman, L. G.; Zhou, X.; Wang, L.; Farach-Carson, M. C.; Kirn-Safran, C. B. Ribosomal Protein L29/HIP Deficiency Delays Osteogenesis and Increases Fragility of Adult Bone in Mice. *J. Orthop. Res.* **2009**, *27* (1), 28–35. <https://doi.org/10.1002/jor.20706>.
  31. Aseev, L. V.; Boni, I. V. Extraribosomal Functions of Bacterial Ribosomal Proteins. *Mol. Biol.* **2011**, *45* (5), 739–750. <https://doi.org/10.1134/S0026893311050025>.
  32. Finley, D.; Bartel, B.; Varshavsky, A. The Tails of Ubiquitin Precursors Are Ribosomal Proteins Whose Fusion to Ubiquitin Facilitates Ribosome Biogenesis. *Nature* **1989**, *338* (6214), 394–401. <https://doi.org/10.1038/338394a0>.
  33. Chen, J.-G. RACK1 Mediates Multiple Hormone Responsiveness and Developmental Processes in *Arabidopsis*. *Journal of Experimental Botany* **2006**, *57* (11), 2697–2708. <https://doi.org/10.1093/jxb/erl035>.
  34. Guo, J.; Chen, J.-G. RACK1 Genes Regulate Plant Development with Unequal Genetic Redundancy in *Arabidopsis*. *BMC Plant Biol.* **2008**, *8* (1), 108. <https://doi.org/10.1186/1471-2229-8-108>.
  35. Cheng, Z.; Li, J.-F.; Niu, Y.; Zhang, X.-C.; Woody, O. Z.; Xiong, Y.; Djonović, S.; Millet, Y.; Bush, J.; McConkey, B. J.; Sheen, J.; Ausubel, F. M. Pathogen-Secreted Proteases Activate a Novel Plant Immune Pathway. *Nature* **2015**, *521* (7551), 213–216. <https://doi.org/10.1038/nature14243>.
  36. Kakehi, J.-I.; Kawano, E.; Yoshimoto, K.; Cai, Q.; Imai, A.; Takahashi, T. Mutations in Ribosomal Proteins, RPL4 and RACK1, Suppress the Phenotype of a Thermospermine-Deficient Mutant of *Arabidopsis Thaliana*. *PLoS ONE* **2015**, *10* (1), e0117309. <https://doi.org/10.1371/journal.pone.0117309>.
