# Supplementary material for: Solanum tuberosum Microtuber Development under Darkness Unveiled through RNAseq Transcriptomic Analysis
Source: MDPI journal article supplement (doi:10.3390/ijms232213835), 2022-11-10
Supplement: s1 [file s1]

## Article

## Supplementary Figures

# *Solanum tuberosum* Microtuber development under darkness unveiled through RNAseq Transcriptomic analysis

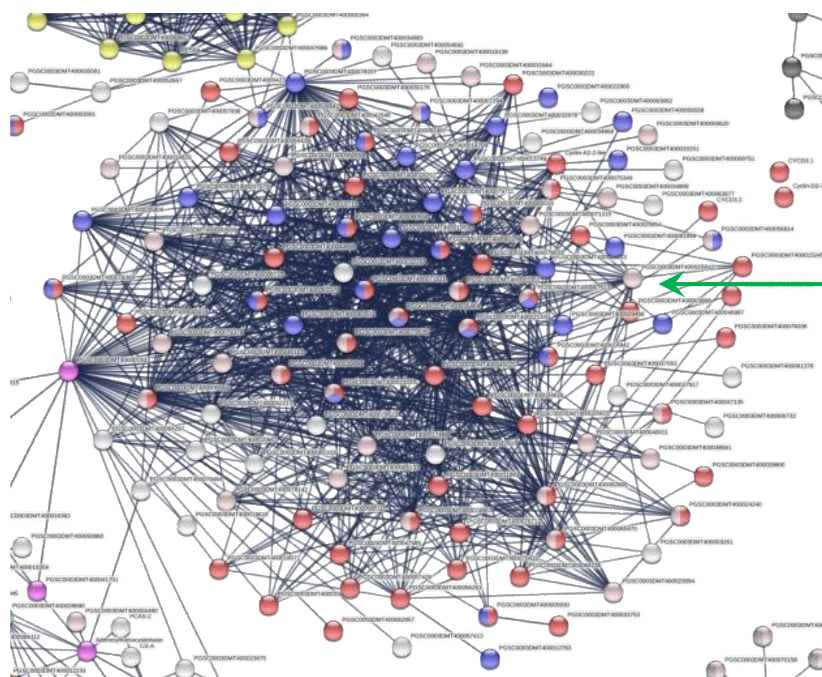

**Figure S1.** CC PPI network of upregulated DEG derived using STRING database from genome-wide analysis of potato *S. tuberosum* with highest confidence (0.860). Selected proteins are highlighted with the name of the gene.

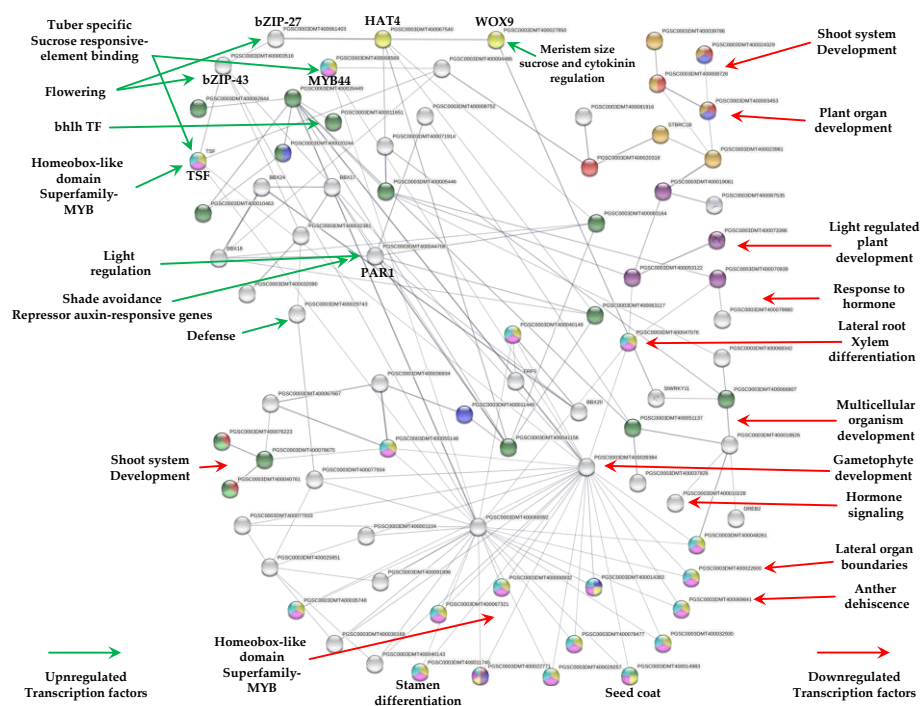

Figure S2. PPI network of up and downregulated TFs derived using STRING database from genome-wide analysis of potato *S. tuberosum* with medium confidence (0.400). The figure represents a full network, the edges indicate both functional and physical protein associations.
