# Supplementary material for: Solanum tuberosum Microtuber Development under Darkness Unveiled through RNAseq Transcriptomic Analysis
Source: Int J Mol Sci. 2022 Nov 10;23(22):13835. doi: 10.3390/ijms232213835 (PMC9696990; doi:10.3390/ijms232213835)
Supplement: Supplementary file 1 [file ijms-23-13835-s001.zip › ijms-1961805-supplementary Table S2.xlsx]

## Sheet: Upregulated genes
Upregulated genes from the genome-wide analysis
Identifier	Annotation
4113.PGSC0003DMT400078182	Uncharacterized protein; Expansin18
4113.PGSC0003DMT400051049	Uncharacterized protein; Cinnamoyl CoA reductase
4113.PGSC0003DMT400026172	Uncharacterized protein; BIPINNATA
4113.PGSC0003DMT400002934	Uncharacterized protein; Allene oxide synthase 2; Belongs to the cytochrome P450 family
4113.PGSC0003DMT400033417	Non-specific lipid-transfer protein; Plant non-specific lipid-transfer proteins transfer phospholipids as well as galactolipids across membranes. May play a role in wax or cutin deposition in the cell walls of expanding epidermal cells and certain secretory tissues
4113.PGSC0003DMT400070920	Superoxide dismutase; Destroys radicals which are normally produced within the cells and which are toxic to biological systems
4113.PGSC0003DMT400010685	Uncharacterized protein; Asparagine synthetase [glutamine-hydrolyzing]
4113.PGSC0003DMT400060254	Epoxide hydrolase
4113.PGSC0003DMT400006894	Fructose-bisphosphate aldolase
4113.PGSC0003DMT400013500	Glucose-6-phosphate/phosphate translocator 2
4113.PGSC0003DMT400005245	34 kDa outer mitochondrial membrane protein porin
4113.PGSC0003DMT400050094	Uncharacterized protein; GDP-mannose 3',5'-epimerase
4113.PGSC0003DMT400002502	Uncharacterized protein; Isoamylase isoform 2
4113.PGSC0003DMT400052215	Peroxidase; Removal of H(2)O(2), oxidation of toxic reductants, biosynthesis and degradation of lignin, suberization, auxin catabolism, response to environmental stresses such as wounding, pathogen attack and oxidative stress
4113.PGSC0003DMT400055468	Uncharacterized protein; Conserved gene of unknown function
4113.PGSC0003DMT400038659	Uncharacterized protein; Zinc/iron transporter
4113.PGSC0003DMT400089913	Low molecular weight heat-shock protein; Belongs to the small heat shock protein (HSP20) family
4113.PGSC0003DMT400047203	Protein ULTRAPETALA1
4113.PGSC0003DMT400020827	Uncharacterized protein; Conserved gene of unknown function
4113.PGSC0003DMT400053842	Uncharacterized protein; Conserved gene of unknown function
4113.PGSC0003DMT400023454	Uncharacterized protein; Triacylglycerol lipase
4113.PGSC0003DMT400056815	Uncharacterized protein; Conserved gene of unknown function
4113.PGSC0003DMT400024493	Uncharacterized protein; Phosphoglycerate mutase
4113.PGSC0003DMT400042825	Uncharacterized protein; Cytochrome P450
4113.PGSC0003DMT400005369	Uncharacterized protein; Transcription factor, partial
4113.PGSC0003DMT400084297	Zinc finger protein
4113.PGSC0003DMT400040186	Peroxidase 15; Belongs to the peroxidase family. Classical plant (class III) peroxidase subfamily
4113.PGSC0003DMT400029506	Uncharacterized protein; Flowering promoting factor-like 1
4113.PGSC0003DMT400002701	Uncharacterized protein; Glucose-6-phosphate/phosphate translocator 1, chloroplast
4113.PGSC0003DMT400079838	PsPK3 protein
4113.PGSC0003DMT400040232	Uncharacterized protein; Purine permease
4113.PGSC0003DMT400010253	Uncharacterized protein; ALCATRAZ/SPATULA
4113.PGSC0003DMT400074783	LOB domain-containing protein
4113.PGSC0003DMT400048873	Kinesin-like protein; Kinesin-3; Belongs to the TRAFAC class myosin-kinesin ATPase superfamily. Kinesin family
4113.PGSC0003DMT400040459	ATP binding protein
4113.PGSC0003DMT400065013	Uncharacterized protein; S-adenosyl-L-methionine-dependent uroporphyrinogen III methyltransferase; Belongs to the precorrin methyltransferase family
4113.PGSC0003DMT400028220	Uncharacterized protein; UPA23
4113.PGSC0003DMT400045864	Protein FAM96B
4113.PGSC0003DMT400001105	Zinc finger family protein
4113.PGSC0003DMT400056814	Ubiquitin carrier protein; Belongs to the ubiquitin-conjugating enzyme family
4113.PGSC0003DMT400024170	Uncharacterized protein; Argininosuccinate lyase
4113.PGSC0003DMT400004360	Uncharacterized protein; Ascorbate peroxidase; Belongs to the peroxidase family
4113.PGSC0003DMT400063296	WD-repeat protein
4113.PGSC0003DMT400018493	Uncharacterized protein; P-coumaroyl quinate/shikimate 3'-hydroxylase; Belongs to the cytochrome P450 family
4113.PGSC0003DMT400069374	3-oxoacyl-(Acyl-carrier protein) reductase
4113.PGSC0003DMT400072825	Uncharacterized protein; Conserved gene of unknown function
4113.PGSC0003DMT400038360	Rad1 DNA damage checkpoint protein
4113.PGSC0003DMT400078930	Uncharacterized protein; 1,2-diacylglycerol 3-beta-galactosyltransferase
4113.PGSC0003DMT400007590	Uncharacterized protein; Chaperonin 21; Belongs to the GroES chaperonin family
4113.PGSC0003DMT400002722	Tryptophan synthase beta subunit
4113.PGSC0003DMT400079111	Uncharacterized protein; Type 2 proly 4-hydroxylase
4113.PGSC0003DMT400016038	Uncharacterized protein; Pyruvate decarboxylase; Belongs to the TPP enzyme family
4113.PGSC0003DMT400001108	Histone H2B.2
4113.PGSC0003DMT400023552	Uncharacterized protein; Conserved gene of unknown function
4113.PGSC0003DMT400083101	Biotin carboxyl carrier protein of acetyl-CoA carboxylase; This protein is a component of the acetyl coenzyme A carboxylase complex; first, biotin carboxylase catalyzes the carboxylation of the carrier protein and then the transcarboxylase transfers the carboxyl group to form malonyl-CoA
4113.PGSC0003DMT400042548	Uncharacterized protein; Helicase
4113.PGSC0003DMT400003457	Uncharacterized protein; SP1L
4113.PGSC0003DMT400064728	Uncharacterized protein; Conserved gene of unknown function
4113.PGSC0003DMT400062857	Uncharacterized protein; E2F
4113.PGSC0003DMT400063298	Glycosyltransferase; UDP-glucosyltransferase; Belongs to the UDP-glycosyltransferase family
4113.PGSC0003DMT400027835	D-tyrosyl-tRNA(Tyr) deacylase
4113.PGSC0003DMT400011793	Uncharacterized protein; Conserved gene of unknown function
4113.PGSC0003DMT400051168	Uncharacterized protein; Adenylyl-sulfate reductase
4113.PGSC0003DMT400013749	Uncharacterized protein; Brca1 associated ring domain
4113.PGSC0003DMT400078932	Ubiquitin-protein ligase
4113.PGSC0003DMT400015093	Aspartic proteinase nepenthesin-2; Belongs to the peptidase A1 family
4113.PGSC0003DMT400031935	Trehalase
4113.PGSC0003DMT400088862	Uncharacterized protein; CXE carboxylesterase
4113.PGSC0003DMT400067218	Uncharacterized protein; Ethylene response factor 1
4113.PGSC0003DMT400079040	Acyl carrier protein; Carrier of the growing fatty acid chain in fatty acid biosynthesis
4113.PGSC0003DMT400078609	Proteinase inhibitor IIa
4113.PGSC0003DMT400065014	Uncharacterized protein; Cohesin subunit rad21
4113.PGSC0003DMT400042550	Uncharacterized protein; Conserved gene of unknown function
4113.PGSC0003DMT400027131	Uncharacterized protein; Lectin receptor kinase
4113.PGSC0003DMT400007879	Uncharacterized protein; GRAS family transcription factor; Belongs to the GRAS family
4113.PGSC0003DMT400032728	Non-specific lipid-transfer protein; Belongs to the plant LTP family
4113.PGSC0003DMT400013748	Uncharacterized protein; Conserved gene of unknown function
4113.PGSC0003DMT400039644	Sodium/calcium exchanger family protein; Belongs to the Ca(2+):cation antiporter (CaCA) (TC 2.A.19) family
4113.PGSC0003DMT400067496	Uncharacterized protein; Transcription factor
4113.PGSC0003DMT400012912	Uncharacterized protein; Conserved gene of unknown function
4113.PGSC0003DMT400091080	Uncharacterized protein; Gibberellin receptor GID1
4113.PGSC0003DMT400006010	Uncharacterized protein; Aldo/keto reductase 2
4113.PGSC0003DMT400040971	Uncharacterized protein; IDS4
4113.PGSC0003DMT400048268	Glycosyltransferase; Zeatin O-glucosyltransferase; Belongs to the UDP-glycosyltransferase family
4113.PGSC0003DMT400026382	Uncharacterized protein; Pentatricopeptide
4113.PGSC0003DMT400017939	Uncharacterized protein; Conserved gene of unknown function
4113.PGSC0003DMT400061710	Uncharacterized protein; ATP:citrate lyase
4113.PGSC0003DMT400040284	Uncharacterized protein; LATD/NIP
4113.PGSC0003DMT400035192	Uncharacterized protein; Kinase
4113.PGSC0003DMT400053095	Uncharacterized protein; Conserved gene of unknown function
4113.PGSC0003DMT400014415	Uncharacterized protein; Beta-mannosidase; Belongs to the glycosyl hydrolase 1 family
4113.PGSC0003DMT400000942	Uncharacterized protein; Conserved gene of unknown function
4113.PGSC0003DMT400058713	Uncharacterized protein; Conserved gene of unknown function
4113.PGSC0003DMT400052416	Uncharacterized protein; Conserved gene of unknown function
4113.PGSC0003DMT400079650	Uncharacterized protein; Conserved gene of unknown function
4113.PGSC0003DMT400054620	Subtilase family protein; Belongs to the peptidase S8 family
4113.PGSC0003DMT400037950	Adenosine monophosphate binding protein 1 AMPBP1
4113.PGSC0003DMT400077330	Uncharacterized protein; Conserved gene of unknown function
4113.PGSC0003DMT400012668	Uncharacterized protein; Transferase, transferring glycosyl groups
4113.PGSC0003DMT400071701	Uncharacterized protein; Avr9/Cf-9 induced kinase 1
4113.PGSC0003DMT400055428	Uncharacterized protein; Cyclin A; Belongs to the cyclin family
4113.PGSC0003DMT400043020	Receptor protein kinase CLAVATA1
4113.PGSC0003DMT400051717	Uncharacterized protein; Glutaredoxin S12
4113.PGSC0003DMT400073398	Uncharacterized protein; Cinnamoyl-CoA reductase
4113.PGSC0003DMT400020982	Uncharacterized protein; Structural constituent of cell wall
4113.PGSC0003DMT400023675	D-3-phosphoglycerate dehydrogenase, chloroplastic; Belongs to the D-isomer specific 2-hydroxyacid dehydrogenase family
4113.PGSC0003DMT400060303	Uncharacterized protein; Isocitrate lyase and phosphorylmutase
4113.PGSC0003DMT400033227	DNA binding protein
4113.PGSC0003DMT400047585	Uncharacterized protein; Cell division control 20
4113.PGSC0003DMT400061487	Uncharacterized protein; 1-aminocyclopropane-1-carboxylate oxidase homolog
4113.PGSC0003DMT400049672	F-box/leucine rich repeat protein
4113.PGSC0003DMT400070158	Uncharacterized protein; Leucine-rich repeat receptor kinase
4113.PGSC0003DMT400025219	Uncharacterized protein; Kinase; Belongs to the carbohydrate kinase PfkB family
4113.PGSC0003DMT400040848	Uncharacterized protein; Short-chain dehydrogenase; Belongs to the short-chain dehydrogenases/reductases (SDR) family
4113.PGSC0003DMT400093266	Uncharacterized protein; Conserved gene of unknown function
4113.PGSC0003DMT400058792	Uncharacterized protein; DNAJ heat shock N-terminal domain-containing protein
4113.PGSC0003DMT400079384	Uncharacterized protein; Dicyanin
4113.PGSC0003DMT400071700	Xylem serine proteinase 1
4113.PGSC0003DMT400060396	Pleiotropic drug resistance protein 2; Belongs to the ABC transporter superfamily. ABCG family. PDR (TC 3.A.1.205) subfamily
4113.PGSC0003DMT400040717	Serine hydroxymethyltransferase; Interconversion of serine and glycine; Belongs to the SHMT family
4113.PGSC0003DMT400036570	Clathrin assembly protein
4113.PGSC0003DMT400074390	Aspartic proteinase nepenthesin-1; Belongs to the peptidase A1 family
4113.PGSC0003DMT400065173	Uncharacterized protein; BRASSINOSTEROID INSENSITIVE 1-associated receptor kinase 1; Belongs to the protein kinase superfamily. Ser/Thr protein kinase family
4113.PGSC0003DMT400081406	Heat shock protein binding protein
4113.PGSC0003DMT400079797	Uncharacterized protein; Conserved gene of unknown function
4113.PGSC0003DMT400052347	Uncharacterized protein; Sialin
4113.PGSC0003DMT400051403	Uncharacterized protein; Conserved gene of unknown function
4113.PGSC0003DMT400057616	Serine carboxypeptidase; Belongs to the peptidase S10 family
4113.PGSC0003DMT400009860	Xyloglucan endotransglucosylase/hydrolase; Catalyzes xyloglucan endohydrolysis (XEH) and/or endotransglycosylation (XET). Cleaves and religates xyloglucan polymers, an essential constituent of the primary cell wall, and thereby participates in cell wall construction of growing tissues; Belongs to the glycosyl hydrolase 16 family
4113.PGSC0003DMT400040282	Uncharacterized protein; LATD/NIP
4113.PGSC0003DMT400001375	Class III peroxidase; Belongs to the peroxidase family. Classical plant (class III) peroxidase subfamily
4113.PGSC0003DMT400007129	Agenet domain-containing protein
4113.PGSC0003DMT400018296	Epidermis-specific secreted glycoprotein EP1
4113.PGSC0003DMT400042238	Uncharacterized protein; Acetyl co-enzyme A carboxylase biotin carboxylase subunit
4113.PGSC0003DMT400017875	Uncharacterized protein; Conserved gene of unknown function
4113.PGSC0003DMT400070703	STS14 protein; Belongs to the CRISP family
4113.PGSC0003DMT400010103	Uncharacterized protein; Leucine rich repeat receptor kinase
4113.PGSC0003DMT400054077	Putative rRNA methyltransferase; Probable methyltransferase involved in the maturation of rRNA and in the biogenesis of ribosomal subunits
4113.PGSC0003DMT400051388	Tellurite resistance protein tehA
4113.PGSC0003DMT400064322	Nucleic acid binding protein
4113.PGSC0003DMT400031664	Uncharacterized protein; Ubiquitin
4113.PGSC0003DMT400080046	Cyclin-dependent protein kinase
4113.PGSC0003DMT400054936	C2 domain-containing protein
4113.PGSC0003DMT400038377	Nucleic acid binding protein
4113.PGSC0003DMT400041637	Cyclin D2.1 protein; Belongs to the cyclin family
4113.PGSC0003DMT400078582	Uncharacterized protein; Phosphatidic acid phosphatase alpha
4113.PGSC0003DMT400013837	Uncharacterized protein; Gene of unknown function
4113.PGSC0003DMT400078464	Uncharacterized protein; Gene of unknown function
4113.PGSC0003DMT400043075	Uncharacterized protein; Kinase; Belongs to the protein kinase superfamily
4113.PGSC0003DMT400078206	Tubulin beta chain; Tubulin is the major constituent of microtubules. It binds two moles of GTP, one at an exchangeable site on the beta chain and one at a non-exchangeable site on the alpha chain
4113.PGSC0003DMT400052553	Protein DETOXIFICATION; Multidrug resistance pump; Belongs to the multi antimicrobial extrusion (MATE) (TC 2.A.66.1) family
4113.PGSC0003DMT400012218	Uncharacterized protein; Transaldolase ToTAL2
4113.PGSC0003DMT400000064	Uncharacterized protein; Dtdp-4-dehydrorhamnose dehydrogenase
4113.PGSC0003DMT400036147	Uncharacterized protein; Conserved gene of unknown function
4113.PGSC0003DMT400061513	Uncharacterized protein; Conserved gene of unknown function
4113.PGSC0003DMT400069847	60S ribosomal protein L29; Belongs to the eukaryotic ribosomal protein eL29 family
4113.PGSC0003DMT400001826	Zinc finger protein; Belongs to the 'GDSL' lipolytic enzyme family
4113.PGSC0003DMT400053479	Uncharacterized protein; Aquaporin; Belongs to the MIP/aquaporin (TC 1.A.8) family
4113.PGSC0003DMT400079160	Phosphate-induced protein
4113.PGSC0003DMT400037720	Zinc finger protein
4113.PGSC0003DMT400079706	Glutamate decarboxylase isoform1; Belongs to the group II decarboxylase family
4113.PGSC0003DMT400048240	Xyloglucan endotransglucosylase/hydrolase; Catalyzes xyloglucan endohydrolysis (XEH) and/or endotransglycosylation (XET). Cleaves and religates xyloglucan polymers, an essential constituent of the primary cell wall, and thereby participates in cell wall construction of growing tissues; Belongs to the glycosyl hydrolase 16 family
4113.PGSC0003DMT400062149	Uncharacterized protein; Conserved gene of unknown function
4113.PGSC0003DMT400023236	Protein kinase
4113.PGSC0003DMT400044325	Long-chain-alcohol oxidase; Long-chain fatty alcohol oxidase involved in the omega- oxidation pathway of lipid degradation
4113.PGSC0003DMT400047209	Uncharacterized protein; CK25
4113.PGSC0003DMT400079324	Metal ion binding protein
4113.PGSC0003DMT400037917	Uncharacterized protein; Conserved gene of unknown function
4113.PGSC0003DMT400001769	Protein disulfide isomerase family; Belongs to the protein disulfide isomerase family
4113.PGSC0003DMT400064542	Interferon-induced GTP-binding protein mx; Belongs to the TRAFAC class dynamin-like GTPase superfamily. Dynamin/Fzo/YdjA family
4113.PGSC0003DMT400029673	Uncharacterized protein; Glutaredoxin
4113.PGSC0003DMT400031865	Uncharacterized protein; Soluble inorganic pyrophosphatase
4113.PGSC0003DMT400031992	Uncharacterized protein; Triacylglycerol lipase
4113.PGSC0003DMT400037771	Zinc finger protein
4113.PGSC0003DMT400079711	DNA polymerase epsilon subunit; Participates in DNA repair and in chromosomal DNA replication
4113.PGSC0003DMT400017668	Methyltransferase; S-adenosyl-methionine-sterol-C-methyltransferase; Belongs to the class I-like SAM-binding methyltransferase superfamily. Erg6/SMT family
4113.PGSC0003DMT400051401	ATP binding protein
4113.PGSC0003DMT400008569	Uncharacterized protein; Tuber-specific and sucrose-responsive element binding factor
4113.PGSC0003DMT400078138	Uncharacterized protein; NOX1
4113.PGSC0003DMT400047449	Uncharacterized protein; Conserved gene of unknown function
4113.PGSC0003DMT400063904	40S ribosomal protein S2; Belongs to the universal ribosomal protein uS5 family
4113.PGSC0003DMT400060121	Ferredoxin; Ferredoxins are iron-sulfur proteins that transfer electrons in a wide variety of metabolic reactions
4113.PGSC0003DMT400060224	TSC13 protein
4113.PGSC0003DMT400072839	S-acyltransferase; Zinc finger protein; Belongs to the DHHC palmitoyltransferase family
4113.PGSC0003DMT400078207	Proliferating cell nuclear antigen; This protein is an auxiliary protein of DNA polymerase delta and is involved in the control of eukaryotic DNA replication by increasing the polymerase's processibility during elongation of the leading strand
4113.PGSC0003DMT400000930	Meiotic coiled-coil protein
4113.PGSC0003DMT400012216	Uncharacterized protein; Multicopper oxidase
4113.PGSC0003DMT400070945	Serine-threonine protein kinase, plant-type; Belongs to the protein kinase superfamily. Ser/Thr protein kinase family
4113.PGSC0003DMT400003940	Uncharacterized protein; O-linked n-acetylglucosamine transferase, ogt
4113.PGSC0003DMT400039912	Glycosyltransferase; UDP-glucose glucosyltransferase; Belongs to the UDP-glycosyltransferase family
4113.PGSC0003DMT400050860	Uncharacterized protein; Dihydrodipicolinate synthase, chloroplastic
4113.PGSC0003DMT400022520	Uncharacterized protein; Beta-1,3-glucanase; Belongs to the glycosyl hydrolase 17 family
4113.PGSC0003DMT400044328	Peroxisomal membrane protein
4113.PGSC0003DMT400001824	Laccase; Lignin degradation and detoxification of lignin-derived products; Belongs to the multicopper oxidase family
4113.PGSC0003DMT400074587	Uncharacterized protein; Leukotriene A-4 hydrolase
4113.PGSC0003DMT400054066	Flavonol 4'-sulfotransferase; Belongs to the sulfotransferase 1 family
4113.PGSC0003DMT400027944	Uncharacterized protein; Gene of unknown function
4113.PGSC0003DMT400041789	Uncharacterized protein; GLABRA2 expression modulator
4113.PGSC0003DMT400037039	Uncharacterized protein; (S)-N-methylcoclaurine 3'-hydroxylase isozyme; Belongs to the cytochrome P450 family
4113.PGSC0003DMT400038863	Protein kinase; Belongs to the protein kinase superfamily
4113.PGSC0003DMT400070434	Cytoplasmic ribosomal protein S13; Belongs to the universal ribosomal protein uS15 family
4113.PGSC0003DMT400011624	Adenosylhomocysteinase
4113.PGSC0003DMT400046669	Uncharacterized protein; Conserved gene of unknown function
4113.PGSC0003DMT400018476	Uncharacterized protein; Conserved gene of unknown function
4113.PGSC0003DMT400040940	Uncharacterized protein; Receptor kinase
4113.PGSC0003DMT400081988	Metal tolerance protein
4113.PGSC0003DMT400058810	Uncharacterized protein; Rapid alkalinization factor 2
4113.PGSC0003DMT400078951	Ring finger protein
4113.PGSC0003DMT400031869	PRPL11 (PLASTID RIBOSOMAL PROTEIN L11); Belongs to the universal ribosomal protein uL11 family
4113.PGSC0003DMT400076399	Squamosa promoter-binding-like protein; Squamosa promoter binding
4113.PGSC0003DMT400023517	Protein phosphatase 2C 8; Belongs to the PP2C family
4113.PGSC0003DMT400038350	Plastid lipid-associated protein 3, chloroplast
4113.PGSC0003DMT400002471	Uncharacterized protein; Exonuclease
4113.PGSC0003DMT400006086	Hydroxyproline-rich glycoprotein (HRGP)
4113.PGSC0003DMT400003774	Uncharacterized protein; PR10; Belongs to the BetVI family
4113.PGSC0003DMT400006847	Esterase/lipase superfamily protein
4113.PGSC0003DMT400060308	Phenylalanine ammonia-lyase
4113.PGSC0003DMT400018291	Uncharacterized protein; Conserved gene of unknown function
4113.PGSC0003DMT400049192	Uncharacterized protein; Oxidoreductase; Belongs to the iron/ascorbate-dependent oxidoreductase family
4113.PGSC0003DMT400023446	Uncharacterized protein; Spermine synthase; Belongs to the spermidine/spermine synthase family
4113.PGSC0003DMT400006164	40S ribosomal protein S30; Belongs to the eukaryotic ribosomal protein eS30 family
4113.PGSC0003DMT400068533	DNA binding protein
4113.PGSC0003DMT400012577	ATP binding protein; Belongs to the TRAFAC class myosin-kinesin ATPase superfamily. Kinesin family
4113.PGSC0003DMT400062864	Uncharacterized protein; Endonuclease III
4113.PGSC0003DMT400020895	Uncharacterized protein; Kinase
4113.PGSC0003DMT400093900	Phosphate-responsive 1 family protein
4113.PGSC0003DMT400056715	Uncharacterized protein; Conserved gene of unknown function
4113.PGSC0003DMT400057384	Fasciclin-like arabinogalactan protein 10
4113.PGSC0003DMT400008338	Uncharacterized protein; GRF domain class transcription factor
4113.PGSC0003DMT400014973	Uncharacterized protein; Conserved gene of unknown function
4113.PGSC0003DMT400054465	Actin binding protein
4113.PGSC0003DMT400078849	F-box-containing protein 1
4113.PGSC0003DMT400004415	P70 protein
4113.PGSC0003DMT400073746	Uncharacterized protein; Blue copper
4113.PGSC0003DMT400070042	Uncharacterized protein; Hydrolase, hydrolyzing O-glycosyl compounds
4113.PGSC0003DMT400037025	Uncharacterized protein; (S)-N-methylcoclaurine 3'-hydroxylase isozyme; Belongs to the cytochrome P450 family
4113.PGSC0003DMT400013928	Uncharacterized protein; Signal transducer; Belongs to the NPH3 family
4113.PGSC0003DMT400037918	Uncharacterized protein; Glutathione S-transferase; Belongs to the GST superfamily
4113.PGSC0003DMT400068163	Uncharacterized protein; Conserved gene of unknown function
4113.PGSC0003DMT400072569	Uncharacterized protein; Thioredoxin peroxidase
4113.PGSC0003DMT400074386	Uncharacterized protein; Protease inhibitor/seed storage/LTP family protein
4113.PGSC0003DMT400077341	Uncharacterized protein; Conserved gene of unknown function
4113.PGSC0003DMT400025588	Uncharacterized protein; Tetracycline transporter
4113.PGSC0003DMT400044098	Uncharacterized protein; Conserved gene of unknown function; Belongs to the glycosyltransferase 2 family
4113.PGSC0003DMT400060127	40S ribosomal protein S17
4113.PGSC0003DMT400078025	Uncharacterized protein; Conserved gene of unknown function
4113.PGSC0003DMT400003773	TSI-1 protein; Belongs to the BetVI family
4113.PGSC0003DMT400066949	Nuc-1 negative regulatory protein preg
4113.PGSC0003DMT400053199	B3 domain-containing protein
4113.PGSC0003DMT400017488	DNA topoisomerase 2; Control of topological states of DNA by transient breakage and subsequent rejoining of DNA strands. Topoisomerase II makes double-strand breaks
4113.PGSC0003DMT400052053	Uncharacterized protein; Hydrolase, acting on ester bonds
4113.PGSC0003DMT400054093	B3 domain-containing protein Os06g0112300
4113.PGSC0003DMT400049546	Uncharacterized protein; Conserved gene of unknown function
4113.PGSC0003DMT400077358	Heat shock protein 70kD
4113.PGSC0003DMT400045047	Lipoxygenase; Plant lipoxygenase may be involved in a number of diverse aspects of plant physiology including growth and development, pest resistance, and senescence or responses to wounding
4113.PGSC0003DMT400056666	Metal ion binding protein
4113.PGSC0003DMT400060503	DNA replication complex GINS protein PSF2; Belongs to the GINS2/PSF2 family
4113.PGSC0003DMT400065532	Uncharacterized protein; Conserved gene of unknown function
4113.PGSC0003DMT400034621	Uncharacterized protein; Myosin heavy chain
4113.PGSC0003DMT400034490	Uncharacterized protein; ERF transcription factor 5
4113.PGSC0003DMT400004695	Uncharacterized protein; Conserved gene of unknown function
4113.PGSC0003DMT400006849	Esterase/lipase superfamily protein
4113.PGSC0003DMT400022286	LOB domain-containing protein
4113.PGSC0003DMT400028257	Uncharacterized protein; Conserved gene of unknown function
4113.PGSC0003DMT400047304	Axoneme-associated protein mst101
4113.PGSC0003DMT400010305	Uncharacterized protein; Cyclin delta-3
4113.PGSC0003DMT400046725	Uncharacterized protein; Conserved gene of unknown function
4113.PGSC0003DMT400063046	LIGULELESS1 protein
4113.PGSC0003DMT400042222	Uncharacterized protein; Thioredoxin peroxidase
4113.PGSC0003DMT400022081	Uncharacterized protein; Diphosphonucleoside phosphohydrolase
4113.PGSC0003DMT400003351	Structural maintenance of chromosomes protein; Condensin complex components subunit
4113.PGSC0003DMT400028627	UPF0503 protein, chloroplastic
4113.PGSC0003DMT400022813	Uncharacterized protein; Short-chain dehydrogenase; Belongs to the short-chain dehydrogenases/reductases (SDR) family
4113.PGSC0003DMT400039904	CycD3;3 protein; Belongs to the cyclin family
4113.PGSC0003DMT400032959	Serine/threonine-protein kinase HT1
4113.PGSC0003DMT400081287	Uncharacterized protein; O-methyltransferase; Belongs to the class I-like SAM-binding methyltransferase superfamily. Cation-independent O- methyltransferase family
4113.PGSC0003DMT400059813	LIGULELESS1 protein
4113.PGSC0003DMT400067663	Uncharacterized protein; Alpha-L-fucosidase 2; Belongs to the 'GDSL' lipolytic enzyme family
4113.PGSC0003DMT400029434	Uncharacterized protein; Conserved gene of unknown function
4113.PGSC0003DMT400012995	Peroxidase; Belongs to the peroxidase family. Classical plant (class III) peroxidase subfamily
4113.PGSC0003DMT400048275	Uncharacterized protein; Lustrin A
4113.PGSC0003DMT400018206	Uncharacterized protein; Conserved gene of unknown function
4113.PGSC0003DMT400011970	Uncharacterized protein; Aldehyde dehydrogenase; Belongs to the aldehyde dehydrogenase family
4113.PGSC0003DMT400017778	Uncharacterized protein; B12D
4113.PGSC0003DMT400047906	Protein DETOXIFICATION; Multidrug resistance pump; Belongs to the multi antimicrobial extrusion (MATE) (TC 2.A.66.1) family
4113.PGSC0003DMT400042937	Superoxide dismutase; Destroys radicals which are normally produced within the cells and which are toxic to biological systems
4113.PGSC0003DMT400081467	Kinase interacting family protein
4113.PGSC0003DMT400070356	Uncharacterized protein; Mta/sah nucleosidase
4113.PGSC0003DMT400064385	60S ribosomal protein L8
4113.PGSC0003DMT400007990	Uncharacterized protein; Leucoanthocyanidin dioxygenase
4113.PGSC0003DMT400032901	Uncharacterized protein; Conserved gene of unknown function
4113.PGSC0003DMT400030176	Uncharacterized protein; Cyclin A; Belongs to the cyclin family
4113.PGSC0003DMT400010074	Leucine-rich repeat transmembrane protein kinase
4113.PGSC0003DMT400059989	GATA transcription factor; Transcriptional activator that specifically binds 5'- GATA-3' or 5'-GAT-3' motifs within gene promoters
4113.PGSC0003DMT400018285	NHL repeat-containing protein
4113.PGSC0003DMT400054476	Uncharacterized protein; DWARF1/DIMINUTO
4113.PGSC0003DMT400016458	Tyrosine specific protein phosphatase family protein
4113.PGSC0003DMT400075535	Gamma-glutamylcyclotransferase; Catalyzes the formation of 5-oxoproline from gamma- glutamyl dipeptides and plays a significant role in glutathione (GSH) homeostasis
4113.PGSC0003DMT400042347	Uncharacterized protein; E2F4,5
4113.PGSC0003DMT400022129	Uncharacterized protein; Conserved gene of unknown function
4113.PGSC0003DMT400033202	Fasciclin-like arabinogalactan protein 13
4113.PGSC0003DMT400061915	Uncharacterized protein; Thioredoxin Y1, chloroplastic
4113.PGSC0003DMT400023049	Uncharacterized protein; Conserved gene of unknown function
4113.PGSC0003DMT400027257	Uncharacterized protein; Conserved gene of unknown function
4113.PGSC0003DMT400008733	Uncharacterized protein; Origin-recognition complex subunit 6
4113.PGSC0003DMT400043086	Uncharacterized protein; Zinc finger, RING-type
4113.PGSC0003DMT400081416	Uncharacterized protein; Conserved gene of unknown function
4113.PGSC0003DMT400063714	Bidirectional sugar transporter SWEET; Mediates both low-affinity uptake and efflux of sugar across the membrane
4113.PGSC0003DMT400086265	Inositol-tetrakisphosphate 1-kinase; Kinase that can phosphorylate various inositol polyphosphate such as Ins(3,4,5,6)P4 or Ins(1,3,4)P3; Belongs to the ITPK1 family
4113.PGSC0003DMT400002870	Histone H3.2
4113.PGSC0003DMT400023212	Uncharacterized protein; Conserved gene of unknown function
4113.PGSC0003DMT400078142	Uncharacterized protein; Bipolar kinesin KRP-130; Belongs to the TRAFAC class myosin-kinesin ATPase superfamily. Kinesin family
4113.PGSC0003DMT400014828	Nucleoside diphosphate kinase
4113.PGSC0003DMT400054692	Uncharacterized protein; Conserved gene of unknown function
4113.PGSC0003DMT400042581	Uncharacterized protein; Conserved gene of unknown function
4113.PGSC0003DMT400017784	Glycosyltransferase UGT90A7; Belongs to the UDP-glycosyltransferase family
4113.PGSC0003DMT400079361	Protein kinase APK1B, chloroplast; Belongs to the protein kinase superfamily
4113.PGSC0003DMT400062314	Uncharacterized protein; Gibberellin 20-oxidase-1; Belongs to the iron/ascorbate-dependent oxidoreductase family
4113.PGSC0003DMT400032104	Uncharacterized protein; Polygalacturonase; Belongs to the glycosyl hydrolase 28 family
4113.PGSC0003DMT400073758	Uncharacterized protein; Histone-lysine N-methyltransferase ATXR6
4113.PGSC0003DMT400023052	Uncharacterized protein; UNC93
4113.PGSC0003DMT400070621	Uncharacterized protein; Ribonuclease t2; Belongs to the RNase T2 family
4113.PGSC0003DMT400040760	60S ribosomal protein L13a; Belongs to the universal ribosomal protein uL13 family
4113.PGSC0003DMT400047310	Uncharacterized protein; Structural molecule
4113.PGSC0003DMT400009043	Aldose 1-epimerase; Belongs to the glucose-6-phosphate 1-epimerase family
4113.PGSC0003DMT400079535	DNA helicase; Minichromosome maintenance 4 protein; Belongs to the MCM family
4113.PGSC0003DMT400012953	Pentatricopeptide repeat-containing protein
4113.PGSC0003DMT400076390	Uncharacterized protein; Gene of unknown function
4113.PGSC0003DMT400011963	Uncharacterized protein; ATP:citrate lyase
4113.PGSC0003DMT400079360	Uncharacterized protein; Conserved gene of unknown function
4113.PGSC0003DMT400054791	Uncharacterized protein; Phosphoenolpyruvate carboxylase
4113.PGSC0003DMT400026419	Uncharacterized protein; MYB transcription factor
4113.PGSC0003DMT400007869	Uncharacterized protein; Osmotin
4113.PGSC0003DMT400000651	Aspartic proteinase nepenthesin-1; Belongs to the peptidase A1 family
4113.PGSC0003DMT400067909	Uncharacterized protein; Ubiquitin-associated uba/ubx domain-containing protein
4113.PGSC0003DMT400044982	DNA binding protein
4113.PGSC0003DMT400050206	Uncharacterized protein; Conserved gene of unknown function
4113.PGSC0003DMT400021880	ATP binding protein
4113.PGSC0003DMT400052733	Uncharacterized protein; Conserved gene of unknown function
4113.PGSC0003DMT400028800	Tubulin beta chain; Tubulin is the major constituent of microtubules. It binds two moles of GTP, one at an exchangeable site on the beta chain and one at a non-exchangeable site on the alpha chain
4113.PGSC0003DMT400074094	LeArcA1 protein
4113.PGSC0003DMT400060658	Ribonucleoside-diphosphate reductase; Provides the precursors necessary for DNA synthesis. Catalyzes the biosynthesis of deoxyribonucleotides from the corresponding ribonucleotides
4113.PGSC0003DMT400081999	Uncharacterized protein; Nse1 non-SMC component of SMC5-6 complex family protein
4113.PGSC0003DMT400005480	Uncharacterized protein; GRAS family transcription factor; Belongs to the GRAS family
4113.PGSC0003DMT400090285	Uncharacterized protein; Beta-glucan-elicitor receptor
4113.PGSC0003DMT400036981	Acyl carrier protein; Carrier of the growing fatty acid chain in fatty acid biosynthesis
4113.PGSC0003DMT400013074	DNA binding protein
4113.PGSC0003DMT400018282	BES1/BZR1 homolog protein 4
4113.PGSC0003DMT400035325	Kinesin-like protein; Kinesin NACK2; Belongs to the TRAFAC class myosin-kinesin ATPase superfamily. Kinesin family
4113.PGSC0003DMT400072330	Protein kinase; Belongs to the protein kinase superfamily. Ser/Thr protein kinase family
4113.PGSC0003DMT400025705	AT-hook motif nuclear-localized protein; Transcription factor that specifically binds AT-rich DNA sequences related to the nuclear matrix attachment regions (MARs)
4113.PGSC0003DMT400021734	Uncharacterized protein; Conserved gene of unknown function
4113.PGSC0003DMT400040209	Auxin-regulated protein
4113.PGSC0003DMT400063324	Uncharacterized protein; Cytochrome P450
4113.PGSC0003DMT400029340	Phosphatase 2C family protein
4113.PGSC0003DMT400051690	Uncharacterized protein; Conserved gene of unknown function
4113.PGSC0003DMT400035064	Uncharacterized protein; ATP-citrate synthase
4113.PGSC0003DMT400073024	Zinc finger protein; Belongs to the 'GDSL' lipolytic enzyme family
4113.PGSC0003DMT400032718	Uncharacterized protein; DH putative beta-hydroxyacyl-ACP dehydratase
4113.PGSC0003DMT400047340	Wound induced protein
4113.PGSC0003DMT400061371	Uncharacterized protein; GTP-binding Rop/Rac GTPase; Belongs to the small GTPase superfamily. Rho family
4113.PGSC0003DMT400006733	Uncharacterized protein; ESTs AU078251(R0889)
4113.PGSC0003DMT400022099	Histone H2B
4113.PGSC0003DMT400051950	Protein XRI1
4113.PGSC0003DMT400054637	LOB domain-containing protein 4
4113.PGSC0003DMT400030513	Uncharacterized protein; Serpin; Belongs to the serpin family
4113.PGSC0003DMT400058291	Uncharacterized protein; Inactive receptor kinase
4113.PGSC0003DMT400016450	RabGAP/TBC domain-containing protein
4113.PGSC0003DMT400021579	H/ACA ribonucleoprotein complex subunit; Required for ribosome biogenesis. Part of a complex which catalyzes pseudouridylation of rRNA. This involves the isomerization of uridine such that the ribose is subsequently attached to C5, instead of the normal N1
4113.PGSC0003DMT400078144	Ankyrin repeat-containing protein
4113.PGSC0003DMT400014006	Uncharacterized protein; Gulonolactone oxidase
4113.PGSC0003DMT400010531	NHL repeat-containing protein
4113.PGSC0003DMT400045531	Uncharacterized protein; Cytochrome b5
4113.PGSC0003DMT400040585	Protein RSI-1
4113.PGSC0003DMT400030442	Uncharacterized protein; Caspase
4113.PGSC0003DMT400057502	Uncharacterized protein; Conserved gene of unknown function
4113.PGSC0003DMT400013905	Uncharacterized GPI-anchored protein
4113.PGSC0003DMT400034604	Uncharacterized protein; Conserved gene of unknown function
4113.PGSC0003DMT400051832	Wound-inducible carboxypeptidase; Belongs to the peptidase S10 family
4113.PGSC0003DMT400030222	Uncharacterized protein; Cyclin A; Belongs to the cyclin family
4113.PGSC0003DMT400040154	Very-long-chain (3R)-3-hydroxyacyl-CoA dehydratase; Catalyzes the third of the four reactions of the long- chain fatty acids elongation cycle. This endoplasmic reticulum- bound enzymatic process, allows the addition of two carbons to the chain of long- and very long-chain fatty acids/VLCFAs per cycle. This enzyme catalyzes the dehydration of the 3-hydroxyacyl-CoA intermediate into trans-2,3-enoyl…
4113.PGSC0003DMT400027205	Nucleic acid binding protein
4113.PGSC0003DMT400070953	Uncharacterized protein; Conserved gene of unknown function
4113.PGSC0003DMT400004125	Peptidyl-prolyl cis-trans isomerase; PPIases accelerate the folding of proteins. It catalyzes the cis-trans isomerization of proline imidic peptide bonds in oligopeptides
4113.PGSC0003DMT400030287	Uncharacterized protein; Conserved gene of unknown function
4113.PGSC0003DMT400005270	Protein COBRA
4113.PGSC0003DMT400033560	MRNA binding protein
4113.PGSC0003DMT400078033	Cell division control protein; Cdc6; Belongs to the CDC6/cdc18 family
4113.PGSC0003DMT400045511	Uncharacterized protein; Kinase
4113.PGSC0003DMT400056132	Kinesin-like protein; Kinesin; Belongs to the TRAFAC class myosin-kinesin ATPase superfamily. Kinesin family
4113.PGSC0003DMT400019322	Uncharacterized protein; Phosphoenolpyruvate carboxylase
4113.PGSC0003DMT400026353	Protein DETOXIFICATION; Anthocyanin permease; Belongs to the multi antimicrobial extrusion (MATE) (TC 2.A.66.1) family
4113.PGSC0003DMT400067616	Lipid binding protein
4113.PGSC0003DMT400016463	Uncharacterized protein; Xyloglucan galactosyltransferase KATAMARI1
4113.PGSC0003DMT400062635	Uncharacterized protein; Gamma-glutamyl-gamma-aminobutyrate hydrolase
4113.PGSC0003DMT400023208	Aluminum-induced protein
4113.PGSC0003DMT400047627	Uncharacterized protein; 6-phosphogluconolactonase
4113.PGSC0003DMT400051681	Uncharacterized protein; 1-aminocyclopropane-1-carboxylate oxidase; Belongs to the iron/ascorbate-dependent oxidoreductase family
4113.PGSC0003DMT400076103	Uncharacterized protein; Transcription factor
4113.PGSC0003DMT400046198	Uncharacterized protein; Conserved gene of unknown function
4113.PGSC0003DMT400026200	Uncharacterized protein; Conserved gene of unknown function
4113.PGSC0003DMT400027925	WD-repeat protein
4113.PGSC0003DMT400070474	Non-specific lipid-transfer protein
4113.PGSC0003DMT400063728	Pectinesterase
4113.PGSC0003DMT400061493	Uncharacterized protein; UDP-glucuronic acid decarboxylase 1 isoform 2
4113.PGSC0003DMT400072886	Uncharacterized protein; Conserved gene of unknown function
4113.PGSC0003DMT400011760	Invertase inhibitor
4113.PGSC0003DMT400072701	S-adenosylmethionine synthase; Catalyzes the formation of S-adenosylmethionine from methionine and ATP
4113.PGSC0003DMT400025706	Auxin efflux carrier family protein
4113.PGSC0003DMT400071215	Uncharacterized protein; B1-type cyclin dependent kinase; Belongs to the protein kinase superfamily
4113.PGSC0003DMT400069644	Uncharacterized protein; R2r3-myb transcription factor
4113.PGSC0003DMT400012359	Beta-galactosidase
4113.PGSC0003DMT400049654	DUF300 family protein
4113.PGSC0003DMT400040011	Uncharacterized protein; ISWI chromatin remodeling complex ATPase ISW1
4113.PGSC0003DMT400076105	Uncharacterized protein; UPA21
4113.PGSC0003DMT400046695	Uncharacterized protein; High-affinity nitrate transport system component
4113.PGSC0003DMT400063219	Uncharacterized protein; Permease I
4113.PGSC0003DMT400076693	Uncharacterized protein; Glucosyltransferase; Belongs to the UDP-glycosyltransferase family
4113.PGSC0003DMT400051829	Uncharacterized protein; Fimbrin
4113.PGSC0003DMT400035267	SAUR family protein
4113.PGSC0003DMT400047311	Wound induced protein
4113.PGSC0003DMT400013354	Uncharacterized protein; 10-deacetylbaccatin III 10-O-acetyltransferase
4113.PGSC0003DMT400065969	Uncharacterized protein; Glucose acyltransferase; Belongs to the peptidase S10 family
4113.PGSC0003DMT400030539	Uncharacterized protein; Serpin; Belongs to the serpin family
4113.PGSC0003DMT400042215	Uncharacterized protein; Ccr4-associated factor
4113.PGSC0003DMT400067881	Uncharacterized protein; Delta(7)-sterol-C5(6)-desaturase; Belongs to the sterol desaturase family
4113.PGSC0003DMT400048497	Uncharacterized protein; Acid phosphatase 1
4113.PGSC0003DMT400035591	Proteasome subunit beta type; The proteasome is a multicatalytic proteinase complex which is characterized by its ability to cleave peptides with Arg, Phe, Tyr, Leu, and Glu adjacent to the leaving group at neutral or slightly basic pH; Belongs to the peptidase T1B family
4113.PGSC0003DMT400014391	Uncharacterized protein; Gene of unknown function
4113.PGSC0003DMT400030589	Uncharacterized protein; Conserved gene of unknown function
4113.PGSC0003DMT400077925	Uncharacterized protein; Male sterility MS5
4113.PGSC0003DMT400009751	Histone H2A
4113.PGSC0003DMT400063439	Protein AUXIN RESPONSE 4
4113.PGSC0003DMT400040874	Serine/threonine-protein kinase PBS1; Belongs to the protein kinase superfamily
4113.PGSC0003DMT400045027	Uncharacterized protein; Ketoacyl-ACP Reductase (KAR); Belongs to the short-chain dehydrogenases/reductases (SDR) family
4113.PGSC0003DMT400052012	DNA cross-link repair protein pso2/snm1
4113.PGSC0003DMT400004111	Dirigent protein; Dirigent proteins impart stereoselectivity on the phenoxy radical-coupling reaction, yielding optically active lignans from two molecules of coniferyl alcohol in the biosynthesis of lignans, flavonolignans, and alkaloids and thus plays a central role in plant secondary metabolism
4113.PGSC0003DMT400014390	Uncharacterized protein; Conserved gene of unknown function
4113.PGSC0003DMT400059357	HVA22-like protein; HVA22 c
4113.PGSC0003DMT400066588	RING-type E3 ubiquitin transferase; U-box domain-containing protein 25
4113.PGSC0003DMT400031301	Uncharacterized protein; CPN60A; Belongs to the chaperonin (HSP60) family
4113.PGSC0003DMT400071594	Uncharacterized protein; Conserved gene of unknown function
4113.PGSC0003DMT400047315	Wound induced protein
4113.PGSC0003DMT400007912	Uncharacterized protein; Conserved gene of unknown function
4113.PGSC0003DMT400047770	Uncharacterized protein; Tetratricopeptide-like helical
4113.PGSC0003DMT400073632	Uncharacterized protein; Alpha-L-fucosidase 2; Belongs to the 'GDSL' lipolytic enzyme family
4113.PGSC0003DMT400032023	Uncharacterized protein; Conserved gene of unknown function
4113.PGSC0003DMT400074100	Pollen-specific C2 domain containing protein
4113.PGSC0003DMT400021415	Uncharacterized protein; 3-beta hydroxysteroid dehydrogenase/isomerase
4113.PGSC0003DMT400021049	Uncharacterized protein; Leucine-rich repeat receptor kinase
4113.PGSC0003DMT400004523	B3 domain-containing protein Os06g0112300
4113.PGSC0003DMT400072567	Uncharacterized protein; Conserved gene of unknown function
4113.PGSC0003DMT400030189	Ubiquitin-protein ligase
4113.PGSC0003DMT400059105	Uncharacterized protein; Myosin heavy chain, embryonic smooth muscle isoform
4113.PGSC0003DMT400033930	Uncharacterized protein; Conserved gene of unknown function
4113.PGSC0003DMT400004108	Dirigent protein; Dirigent proteins impart stereoselectivity on the phenoxy radical-coupling reaction, yielding optically active lignans from two molecules of coniferyl alcohol in the biosynthesis of lignans, flavonolignans, and alkaloids and thus plays a central role in plant secondary metabolism
4113.PGSC0003DMT400070294	Protein tyrosine phosphatase
4113.PGSC0003DMT400024269	Receptor protein kinase CLAVATA1
4113.PGSC0003DMT400080499	Uncharacterized protein; Pectinesterase-2
4113.PGSC0003DMT400036780	Uncharacterized protein; Conserved gene of unknown function
4113.PGSC0003DMT400021562	Tyrosine-specific transport protein
4113.PGSC0003DMT400031680	Ring finger protein
4113.PGSC0003DMT400007465	Uncharacterized protein; Conserved gene of unknown function
4113.PGSC0003DMT400094749	Uncharacterized protein; Glucose-6-phosphate/phosphate translocator 1, chloroplast
4113.PGSC0003DMT400003878	Uncharacterized protein; Acidic 27 kDa endochitinase
4113.PGSC0003DMT400044958	DNA polymerase alpha subunit B; May play an essential role at the early stage of chromosomal DNA replication by coupling the polymerase alpha/primase complex to the cellular replication machinery
4113.PGSC0003DMT400074239	Uncharacterized protein; Conserved gene of unknown function
4113.PGSC0003DMT400044571	Uncharacterized protein; ER glycerol-phosphate acyltransferase
4113.PGSC0003DMT400080556	Nucleic acid binding protein
4113.PGSC0003DMT400027652	Acyl carrier protein; Carrier of the growing fatty acid chain in fatty acid biosynthesis
4113.PGSC0003DMT400059356	Uncharacterized protein; Regulator of chromosome condensation RCC1
4113.PGSC0003DMT400068875	Uncharacterized protein; Inorganic pyrophosphatase
4113.PGSC0003DMT400084734	LIGULELESS1 protein
4113.PGSC0003DMT400004465	Nuclear matrix protein 1
4113.PGSC0003DMT400032914	Uncharacterized protein; 3-ketoacyl-CoA reductase 1; Belongs to the short-chain dehydrogenases/reductases (SDR) family
4113.PGSC0003DMT400074103	ATP binding protein
4113.PGSC0003DMT400060169	Uncharacterized protein; Light-dependent short hypocotyls 1
4113.PGSC0003DMT400020428	Uncharacterized protein; Temperature-induced lipocalin; Belongs to the calycin superfamily. Lipocalin family
4113.PGSC0003DMT400033415	Non-specific lipid-transfer protein; Plant non-specific lipid-transfer proteins transfer phospholipids as well as galactolipids across membranes. May play a role in wax or cutin deposition in the cell walls of expanding epidermal cells and certain secretory tissues
4113.PGSC0003DMT400010514	Xyloglucan endotransglucosylase/hydrolase; Catalyzes xyloglucan endohydrolysis (XEH) and/or endotransglycosylation (XET). Cleaves and religates xyloglucan polymers, an essential constituent of the primary cell wall, and thereby participates in cell wall construction of growing tissues; Belongs to the glycosyl hydrolase 16 family
4113.PGSC0003DMT400034815	Uncharacterized protein; CXE carboxylesterase
4113.PGSC0003DMT400034864	Auxin-induced protein 5NG4
4113.PGSC0003DMT400007618	Uncharacterized protein; Type-a response regulator
4113.PGSC0003DMT400004441	DNA-binding protein S1FA
4113.PGSC0003DMT400046602	Fasciclin-like arabinogalactan protein 9
4113.PGSC0003DMT400013091	Uncharacterized protein; PR-1; Belongs to the CRISP family
4113.PGSC0003DMT400051479	Uncharacterized protein; RNase Phy3; Belongs to the RNase T2 family
4113.PGSC0003DMT400070131	Serine carboxypeptidase-like 27; Belongs to the peptidase S10 family
4113.PGSC0003DMT400078041	Uncharacterized protein; UPA14
4113.PGSC0003DMT400039423	Protein tyrosine phosphatase
4113.PGSC0003DMT400051989	Uncharacterized protein; Conserved gene of unknown function
4113.PGSC0003DMT400015589	Uncharacterized protein; Conserved gene of unknown function
4113.PGSC0003DMT400085766	L24 ribosomal protein
4113.PGSC0003DMT400006161	Uncharacterized protein; Glycosyltransferase, CAZy family GT2; Belongs to the glycosyltransferase 2 family
4113.PGSC0003DMT400065156	40S ribosomal protein S15a-1; Belongs to the universal ribosomal protein uS8 family
4113.PGSC0003DMT400067855	Uncharacterized protein; Conserved gene of unknown function
4113.PGSC0003DMT400004107	Uncharacterized protein; Phospholipase C
4113.PGSC0003DMT400070466	Uncharacterized protein; Leucoanthocyanidin dioxygenase; Belongs to the iron/ascorbate-dependent oxidoreductase family
4113.PGSC0003DMT400038519	Formin-like protein; Formin 6; Belongs to the formin-like family
4113.PGSC0003DMT400021420	DNA replication licensing factor MCM3; Belongs to the MCM family
4113.PGSC0003DMT400062461	Uncharacterized protein; Conserved gene of unknown function
4113.PGSC0003DMT400065726	Uncharacterized protein; Conserved gene of unknown function
4113.PGSC0003DMT400008936	Uncharacterized protein; Oxidoreductase, 2OG-Fe(II) oxygenase family protein; Belongs to the iron/ascorbate-dependent oxidoreductase family
4113.PGSC0003DMT400042163	Uncharacterized protein; 3'-N-debenzoyl-2'-deoxytaxol N-benzoyltransferase
4113.PGSC0003DMT400035271	Bacterioferritin comigratory protein
4113.PGSC0003DMT400097503	BURP domain-containing protein
4113.PGSC0003DMT400046741	Uncharacterized protein; Phosphate/phosphoenolpyruvate translocator
4113.PGSC0003DMT400091423	Ring finger protein
4113.PGSC0003DMT400046987	Uncharacterized protein; Global transcription factor group
4113.PGSC0003DMT400065494	Nucleic acid binding protein
4113.PGSC0003DMT400079485	Uncharacterized protein; Myo inositol monophosphatase
4113.PGSC0003DMT400018192	Uncharacterized protein; RHM1/ROL1
4113.PGSC0003DMT400075311	Uncharacterized protein; Conserved gene of unknown function
4113.PGSC0003DMT400051666	Uncharacterized protein; Histone H1
4113.PGSC0003DMT400081785	Uncharacterized protein; Short chain alcohol dehydrogenase
4113.PGSC0003DMT400069913	Ribosomal protein L33
4113.PGSC0003DMT400013520	Peroxidase; Belongs to the peroxidase family. Classical plant (class III) peroxidase subfamily
4113.PGSC0003DMT400022886	Uncharacterized protein; Conserved gene of unknown function
4113.PGSC0003DMT400025922	Uncharacterized protein; Bubr1
4113.PGSC0003DMT400080179	Uncharacterized protein; Nucellin; Belongs to the peptidase A1 family
4113.PGSC0003DMT400078153	Uncharacterized protein; NADH dehydrogenase
4113.PGSC0003DMT400023831	Dihydrolipoamide acetyltransferase component of pyruvate dehydrogenase complex; Pyruvate dehydrogenase E2 subunit
4113.PGSC0003DMT400012163	FHA domain-containing protein
4113.PGSC0003DMT400079894	Uncharacterized protein; Conserved gene of unknown function
4113.PGSC0003DMT400005594	DNA helicase; Minichromosome maintenance factor; Belongs to the MCM family
4113.PGSC0003DMT400017698	Uncharacterized protein; YA3
4113.PGSC0003DMT400069270	UPF0497 membrane protein 8; Belongs to the Casparian strip membrane proteins (CASP) family
4113.PGSC0003DMT400029242	Glyceraldehyde-3-phosphate dehydrogenase; Belongs to the glyceraldehyde-3-phosphate dehydrogenase family
4113.PGSC0003DMT400030490	Uncharacterized protein; Ent-kaurene oxidase 2; Belongs to the cytochrome P450 family
4113.PGSC0003DMT400010340	ATP binding protein; Belongs to the protein kinase superfamily
4113.PGSC0003DMT400007334	Uncharacterized protein; Conserved gene of unknown function
4113.PGSC0003DMT400046711	Uncharacterized protein; Cytochrome P450 71A4
4113.PGSC0003DMT400063747	Protein phosphatase 2c
4113.PGSC0003DMT400056932	Uncharacterized protein; Leucine rich repeat-type serine/threonine receptor-like kinase; Belongs to the protein kinase superfamily. Ser/Thr protein kinase family
4113.PGSC0003DMT400000664	Uncharacterized protein; Conserved gene of unknown function
4113.PGSC0003DMT400009367	Uncharacterized protein; Gast1
4113.PGSC0003DMT400036700	Uncharacterized protein; Conserved gene of unknown function
4113.PGSC0003DMT400063329	Replication protein A subunit; Component of the replication protein A complex (RPA) required for DNA recombination, repair and replication. The activity of RPA is mediated by single-stranded DNA binding and protein interactions. Probably involved in repair of double-strand DNA breaks (DSBs) induced by genotoxic stresses
4113.PGSC0003DMT400066977	Uncharacterized protein; AP2/ERF domain-containing transcription factor
4113.PGSC0003DMT400005519	Uncharacterized protein; C-4 sterol methyl oxidase 2; Belongs to the sterol desaturase family
4113.PGSC0003DMT400069459	Uncharacterized protein; AGO4-1; Belongs to the argonaute family
4113.PGSC0003DMT400077589	Zinc finger family protein
4113.PGSC0003DMT400047219	Uncharacterized protein; R2r3-myb transcription factor
4113.PGSC0003DMT400032864	Lysosomal Cystine Transporter family protein
4113.PGSC0003DMT400012806	Uncharacterized protein; Gene of unknown function
4113.PGSC0003DMT400006654	Beta-galactosidase
4113.PGSC0003DMT400000234	Uncharacterized protein; Class III chitinase; Belongs to the glycosyl hydrolase 18 family
4113.PGSC0003DMT400035809	Uncharacterized protein; Replication factor A
4113.PGSC0003DMT400053192	ER lumen protein retaining receptor
4113.PGSC0003DMT400033471	Microtubule-associated protein MAP65-1b
4113.PGSC0003DMT400063331	Uncharacterized protein; Conserved gene of unknown function
4113.PGSC0003DMT400067856	Uncharacterized protein; Conserved gene of unknown function
4113.PGSC0003DMT400003329	Aldose 1-epimerase; Converts alpha-aldose to the beta-anomer
4113.PGSC0003DMT400045025	Uncharacterized protein; Plant mitotic spindle assembly checkpoint protein mad2
4113.PGSC0003DMT400078542	ATP binding protein; Belongs to the protein kinase superfamily. Ser/Thr protein kinase family
4113.PGSC0003DMT400069570	Mitochondrial phosphate carrier protein; Belongs to the mitochondrial carrier (TC 2.A.29) family
4113.PGSC0003DMT400022359	DNA-damage-inducible protein f; Belongs to the multi antimicrobial extrusion (MATE) (TC 2.A.66.1) family
4113.PGSC0003DMT400021568	F-box family protein
4113.PGSC0003DMT400070833	Uncharacterized protein; Sodium/potassium/calcium exchanger
4113.PGSC0003DMT400060623	Zinc finger homeodomain protein 1
4113.PGSC0003DMT400039289	Uncharacterized protein; Conserved gene of unknown function
4113.PGSC0003DMT400078794	Uncharacterized protein; Conserved gene of unknown function
4113.PGSC0003DMT400038202	Uncharacterized protein; P-coumaroyl quinate/shikimate 3'-hydroxylase; Belongs to the cytochrome P450 family
4113.PGSC0003DMT400018071	Spindle and kinetochore-associated protein 1 homolog
4113.PGSC0003DMT400071590	Glycosyltransferase; Glucosyltransferase; Belongs to the UDP-glycosyltransferase family
4113.PGSC0003DMT400070011	Uncharacterized protein; Zinc finger, RING-type
4113.PGSC0003DMT400052746	Uncharacterized protein; Isoflavone reductase homolog
4113.PGSC0003DMT400033420	Uncharacterized protein; Conserved gene of unknown function
4113.PGSC0003DMT400064535	Leucine-rich repeat receptor protein kinase EXS
4113.PGSC0003DMT400010343	Uncharacterized protein; Rapid alkalinization factor 3
4113.PGSC0003DMT400004027	Uncharacterized protein; Amino acid transporter
4113.PGSC0003DMT400062317	Uncharacterized protein; Conserved gene of unknown function
4113.PGSC0003DMT400041061	Light-inducible protein ATLS1
4113.PGSC0003DMT400005893	Uncharacterized protein; Triacylglycerol lipase
4113.PGSC0003DMT400061428	Uncharacterized protein; Conserved gene of unknown function
4113.PGSC0003DMT400030364	Uncharacterized protein; Patellin-6
4113.PGSC0003DMT400048541	Elicitor-inducible protein EIG-J7
4113.PGSC0003DMT400038205	Uncharacterized protein; P-coumaroyl quinate/shikimate 3'-hydroxylase; Belongs to the cytochrome P450 family
4113.PGSC0003DMT400027015	Glycine cleavage system H protein; The H protein shuttles the methylamine group of glycine from the P protein to the T protein; Belongs to the GcvH family
4113.PGSC0003DMT400069660	Uncharacterized protein; Nitrate transporter
4113.PGSC0003DMT400003666	UDP-glucose dehydrogenase 2
4113.PGSC0003DMT400015395	Uncharacterized protein; Conserved gene of unknown function
4113.PGSC0003DMT400027828	Salt responsive protein 2
4113.PGSC0003DMT400021093	Uncharacterized protein; Phosphate/phosphoenolpyruvate translocator
4113.PGSC0003DMT400036085	Uncharacterized protein; Conserved gene of unknown function
4113.PGSC0003DMT400067601	Glutathione peroxidase; Belongs to the glutathione peroxidase family
4113.PGSC0003DMT400030372	Uncharacterized protein; Conserved gene of unknown function
4113.PGSC0003DMT400086212	Auxin-induced protein 6B
4113.PGSC0003DMT400079240	Uncharacterized protein; PTP-1
4113.PGSC0003DMT400059818	D-3-phosphoglycerate dehydrogenase; Belongs to the D-isomer specific 2-hydroxyacid dehydrogenase family
4113.PGSC0003DMT400013484	Proline-rich family protein
4113.PGSC0003DMT400075427	Auxin-responsive protein; Aux/IAA proteins are short-lived transcriptional factors that function as repressors of early auxin response genes at low auxin concentrations
4113.PGSC0003DMT400026433	Uncharacterized protein; Conserved gene of unknown function
4113.PGSC0003DMT400001569	Uncharacterized protein; Conserved gene of unknown function
4113.PGSC0003DMT400013372	Uncharacterized protein; Boron transporter
4113.PGSC0003DMT400015871	Uncharacterized protein; Zeamatin
4113.PGSC0003DMT400079474	Uncharacterized protein; BZIP transcription factor
4113.PGSC0003DMT400067635	Uncharacterized protein; Tyramine N-feruloyltransferase 10/30
4113.PGSC0003DMT400058195	Uncharacterized protein; Kinase
4113.PGSC0003DMT400062339	Uncharacterized protein; Conserved gene of unknown function
4113.PGSC0003DMT400031586	Uncharacterized protein; Conserved gene of unknown function
4113.PGSC0003DMT400035344	Uncharacterized protein; Beta-ketoacyl-ACP synthase II; Belongs to the beta-ketoacyl-ACP synthases family
4113.PGSC0003DMT400043680	Uncharacterized protein; Oxidoreductase
4113.PGSC0003DMT400007601	Uncharacterized protein; Conserved gene of unknown function
4113.PGSC0003DMT400012283	Metalloendoproteinase 1; Belongs to the peptidase M10A family
4113.PGSC0003DMT400019584	Uncharacterized protein; Hydroxyphenylpyruvate reductase; Belongs to the D-isomer specific 2-hydroxyacid dehydrogenase family
4113.PGSC0003DMT400037513	Uncharacterized protein; Conserved gene of unknown function
4113.PGSC0003DMT400047443	TPR domain containing protein
4113.PGSC0003DMT400003868	Uncharacterized protein; Cyclin B2; Belongs to the cyclin family
4113.PGSC0003DMT400021429	Avr9/Cf-9 rapidly elicited protein 180
4113.PGSC0003DMT400060612	Very-long-chain (3R)-3-hydroxyacyl-CoA dehydratase; Catalyzes the third of the four reactions of the long- chain fatty acids elongation cycle. This endoplasmic reticulum- bound enzymatic process, allows the addition of two carbons to the chain of long- and very long-chain fatty acids/VLCFAs per cycle. This enzyme catalyzes the dehydration of the 3-hydroxyacyl-CoA intermediate into trans-2,3-enoyl…
4113.PGSC0003DMT400032399	ATP binding protein; Belongs to the TRAFAC class dynamin-like GTPase superfamily. Dynamin/Fzo/YdjA family
4113.PGSC0003DMT400026062	Receptor protein kinase
4113.PGSC0003DMT400028760	Uncharacterized protein; Amino acid transporter
4113.PGSC0003DMT400065043	Protein DETOXIFICATION; Multidrug resistance pump; Belongs to the multi antimicrobial extrusion (MATE) (TC 2.A.66.1) family
4113.PGSC0003DMT400043408	Uncharacterized protein; Short chain alcohol dehydrogenase
4113.PGSC0003DMT400050766	Uncharacterized protein; Protease C56
4113.PGSC0003DMT400013351	Pectinesterase
4113.PGSC0003DMT400033311	Uncharacterized protein; Cytochrome P450
4113.PGSC0003DMT400010346	DNA binding protein
4113.PGSC0003DMT400030200	Uncharacterized protein; Conserved gene of unknown function
4113.PGSC0003DMT400015245	Uncharacterized protein; Cyclin B1; Belongs to the cyclin family
4113.PGSC0003DMT400045299	Protein disulfide-isomerase
4113.PGSC0003DMT400008412	Ndr family protein
4113.PGSC0003DMT400047228	Uncharacterized protein; Conserved gene of unknown function
4113.PGSC0003DMT400078657	Uncharacterized protein; Conserved gene of unknown function
4113.PGSC0003DMT400015811	Nodulin family protein
4113.PGSC0003DMT400023082	Endoglucanase; Endo-1,4-beta-glucanase
4113.PGSC0003DMT400032039	Methanol inducible protein
4113.PGSC0003DMT400037638	Uncharacterized protein; PERK1 kinase
4113.PGSC0003DMT400045532	Uncharacterized protein; Conserved gene of unknown function
4113.PGSC0003DMT400049910	Uncharacterized protein; Conserved gene of unknown function
4113.PGSC0003DMT400029590	Uncharacterized protein; UDP-glucuronate decarboxylase 3
4113.PGSC0003DMT400017707	DNA-damage-inducible protein f; Belongs to the multi antimicrobial extrusion (MATE) (TC 2.A.66.1) family
4113.PGSC0003DMT400039444	Uncharacterized protein; Conserved gene of unknown function
4113.PGSC0003DMT400034958	Histone H2A
4113.PGSC0003DMT400000249	C2 domain-containing protein
4113.PGSC0003DMT400037291	Constitutive plastid-lipid associated protein
4113.PGSC0003DMT400082749	Calmodulin-binding protein
4113.PGSC0003DMT400072655	Ribosomal protein L24E
4113.PGSC0003DMT400031595	Uncharacterized protein; Conserved gene of unknown function
4113.PGSC0003DMT400032036	Methanol inducible protein
4113.PGSC0003DMT400048796	Terpene cyclase/mutase family member; Beta-amyrin synthase; Belongs to the terpene cyclase/mutase family
4113.PGSC0003DMT400018181	Chalcone-flavonone isomerase family protein; Chalcone isomerase; Belongs to the chalcone isomerase family
4113.PGSC0003DMT400020244	Uncharacterized protein; Roothairless1/slippery
4113.PGSC0003DMT400058582	Uncharacterized protein; Adenosine 3'-phospho 5'-phosphosulfate transporter
4113.PGSC0003DMT400023608	Uncharacterized protein; Subtilisin serine protease
4113.PGSC0003DMT400061841	Xyloglucan endotransglucosylase/hydrolase; Catalyzes xyloglucan endohydrolysis (XEH) and/or endotransglycosylation (XET). Cleaves and religates xyloglucan polymers, an essential constituent of the primary cell wall, and thereby participates in cell wall construction of growing tissues; Belongs to the glycosyl hydrolase 16 family
4113.PGSC0003DMT400089018	GATA transcription factor; Transcriptional activator that specifically binds 5'- GATA-3' or 5'-GAT-3' motifs within gene promoters
4113.PGSC0003DMT400021800	Uncharacterized protein; Pollen tube RhoGDI2
4113.PGSC0003DMT400001025	Uncharacterized protein; HSF domain class transcription factor
4113.PGSC0003DMT400020554	Uncharacterized protein; HSF domain class transcription factor
4113.PGSC0003DMT400058799	Peroxidase; Removal of H(2)O(2), oxidation of toxic reductants, biosynthesis and degradation of lignin, suberization, auxin catabolism, response to environmental stresses such as wounding, pathogen attack and oxidative stress
4113.PGSC0003DMT400078786	Uncharacterized protein; ARF GTPase activator
4113.PGSC0003DMT400072413	Uncharacterized protein; ATPP2-A13
4113.PGSC0003DMT400031694	Uncharacterized protein; Conserved gene of unknown function
4113.PGSC0003DMT400007203	Zinc finger protein; Belongs to the 'GDSL' lipolytic enzyme family
4113.PGSC0003DMT400004540	Uncharacterized protein; Glutathione s-transferase; Belongs to the GST superfamily
4113.PGSC0003DMT400051886	Uncharacterized protein; Sulfate/bicarbonate/oxalate exchanger and transporter sat-1
4113.PGSC0003DMT400074566	Calcium ion binding protein
4113.PGSC0003DMT400013647	Nucleic acid binding protein
4113.PGSC0003DMT400001505	Uncharacterized protein; Conserved gene of unknown function
4113.PGSC0003DMT400051966	Uncharacterized protein; ER lumen retaining receptor family
4113.PGSC0003DMT400000838	Uncharacterized protein; Ovate
4113.PGSC0003DMT400037595	Uncharacterized protein; Tyramine N-feruloyltransferase 4/11
4113.PGSC0003DMT400001937	Bifunctional dihydrofolate reductase-thymidylate synthase; Bifunctional enzyme. Involved in de novo dTMP biosynthesis. Key enzyme in folate metabolism
4113.PGSC0003DMT400021231	Uncharacterized protein; Cytochrome P450
4113.PGSC0003DMT400045143	Uncharacterized protein; LOL1 (LSD ONE LIKE 1)
4113.PGSC0003DMT400033112	Glycerol-3-phosphate dehydrogenase
4113.PGSC0003DMT400031260	Two-component response regulator; Transcriptional activator that binds specific DNA sequence
4113.PGSC0003DMT400028037	Glycosyltransferase; Conserved gene of unknown function; Belongs to the UDP-glycosyltransferase family
4113.PGSC0003DMT400049226	18.1 kDa class I heat shock protein; Belongs to the small heat shock protein (HSP20) family
4113.PGSC0003DMT400060963	Uncharacterized protein; Polychome, UV-B-insensitive 4
4113.PGSC0003DMT400039298	Uncharacterized protein; Conserved gene of unknown function
4113.PGSC0003DMT400071809	Uncharacterized protein; Conserved gene of unknown function
4113.PGSC0003DMT400083903	Acyl-protein thioesterase
4113.PGSC0003DMT400010656	Uncharacterized protein; Hydrolase, hydrolyzing O-glycosyl compounds
4113.PGSC0003DMT400045253	Universal stress protein family protein
4113.PGSC0003DMT400063656	Uncharacterized protein; TANGLED
4113.PGSC0003DMT400025339	Uncharacterized protein; Brg-1 associated factor
4113.PGSC0003DMT400044535	LRR receptor-like serine/threonine-protein kinase
4113.PGSC0003DMT400020560	Uncharacterized protein; Triacylglycerol lipase
4113.PGSC0003DMT400001401	Uncharacterized protein; Cinnamoyl-CoA reductase; Belongs to the 3-beta-HSD family
4113.PGSC0003DMT400038429	Ubiquitin-protein ligase
4113.PGSC0003DMT400015864	Uncharacterized protein; Cucumisin
4113.PGSC0003DMT400075459	Thioesterase family protein
4113.PGSC0003DMT400001939	Uncharacterized protein; Diaminopimelate decarboxylase 1, chloroplastic
4113.PGSC0003DMT400011205	Uncharacterized protein; Alpha galactosidase
4113.PGSC0003DMT400001177	Uncharacterized protein; Conserved gene of unknown function
4113.PGSC0003DMT400014809	Water channel protein; Belongs to the MIP/aquaporin (TC 1.A.8) family
4113.PGSC0003DMT400057413	Uncharacterized protein; Lysine decarbxylase
4113.PGSC0003DMT400048966	Uncharacterized protein; Sodium-bile acid cotransporter
4113.PGSC0003DMT400012154	Zinc finger protein
4113.PGSC0003DMT400081370	Lipoxygenase; Plant lipoxygenase may be involved in a number of diverse aspects of plant physiology including growth and development, pest resistance, and senescence or responses to wounding
4113.PGSC0003DMT400009068	Uncharacterized protein; Ocs element-binding factor
4113.PGSC0003DMT400015339	Uncharacterized protein; Methylketone synthase IIa
4113.PGSC0003DMT400069680	Uncharacterized protein; DOF domain class transcription factor
4113.PGSC0003DMT400078998	Uncharacterized protein; Gene of unknown function
4113.PGSC0003DMT400017716	Uncharacterized protein; Conserved gene of unknown function
4113.PGSC0003DMT400042439	Multi antimicrobial extrusion family protein; Belongs to the multi antimicrobial extrusion (MATE) (TC 2.A.66.1) family
4113.PGSC0003DMT400068270	Uncharacterized protein; Conserved gene of unknown function
4113.PGSC0003DMT400002347	Filament-like plant protein
4113.PGSC0003DMT400023804	Sucrose transport protein
4113.PGSC0003DMT400080935	Peptidylprolyl isomerase
4113.PGSC0003DMT400063662	Uncharacterized protein; Plastid CUL1
4113.PGSC0003DMT400066840	Uncharacterized protein; Conserved gene of unknown function
4113.PGSC0003DMT400037093	Tubulin beta chain; Tubulin is the major constituent of microtubules. It binds two moles of GTP, one at an exchangeable site on the beta chain and one at a non-exchangeable site on the alpha chain
4113.PGSC0003DMT400066323	DNA binding protein
4113.PGSC0003DMT400049230	Uncharacterized protein; Rop guanine nucleotide exchange factor
4113.PGSC0003DMT400067513	Uncharacterized protein; Kinase
4113.PGSC0003DMT400022961	Uncharacterized protein; GDP-mannose pyrophosphorylase
4113.PGSC0003DMT400006140	Uncharacterized protein; Chaperonin 21; Belongs to the GroES chaperonin family
4113.PGSC0003DMT400084506	Uncharacterized protein; AP2 domain class transcription factor
4113.PGSC0003DMT400058187	Uncharacterized protein; Ocs element-binding factor
4113.PGSC0003DMT400018904	Uncharacterized protein; Mo-molybdopterin cofactor sulfurase
4113.PGSC0003DMT400056261	Uncharacterized protein; Conserved gene of unknown function
4113.PGSC0003DMT400021183	Calmodulin binding protein
4113.PGSC0003DMT400048130	Anthranilate N-benzoyltransferase protein
4113.PGSC0003DMT400053238	Binding protein
4113.PGSC0003DMT400023253	BRCA1 C Terminus domain containing protein
4113.PGSC0003DMT400003516	Uncharacterized protein; Ocs element-binding factor
4113.PGSC0003DMT400040416	Uncharacterized protein; Conserved gene of unknown function
4113.PGSC0003DMT400031804	Uncharacterized protein; Cytochrome P450 fatty acid omega-hydroxylase
4113.PGSC0003DMT400042438	Protein DETOXIFICATION; Multidrug resistance pump; Belongs to the multi antimicrobial extrusion (MATE) (TC 2.A.66.1) family
4113.PGSC0003DMT400042004	Uncharacterized protein; Phosphoenolpyruvate carboxylase kinase 2; Belongs to the protein kinase superfamily
4113.PGSC0003DMT400051879	Non-specific lipid-transfer protein; Belongs to the plant LTP family
4113.PGSC0003DMT400028653	Glycosyltransferase; UDP-glucose glucosyltransferase; Belongs to the UDP-glycosyltransferase family
4113.PGSC0003DMT400009581	Uncharacterized protein; Transcription factor
4113.PGSC0003DMT400032303	Uncharacterized protein; Conserved gene of unknown function
4113.PGSC0003DMT400053750	Tubulin beta chain; Tubulin is the major constituent of microtubules. It binds two moles of GTP, one at an exchangeable site on the beta chain and one at a non-exchangeable site on the alpha chain
4113.PGSC0003DMT400007698	Protein kinase
4113.PGSC0003DMT400075441	Isoform 2 of TMV resistance protein N
4113.PGSC0003DMT400033367	Uncharacterized protein; Leucine-rich repeat receptor kinase; Belongs to the protein kinase superfamily. Ser/Thr protein kinase family
4113.PGSC0003DMT400055081	Uncharacterized protein; Zinc finger, RING-type
4113.PGSC0003DMT400022965	Uncharacterized protein; Conserved gene of unknown function
4113.PGSC0003DMT400055245	Uncharacterized protein; Adenylyl-sulfate kinase; Belongs to the NPH3 family
4113.PGSC0003DMT400051216	Uncharacterized protein; AMP dependent CoA ligase
4113.PGSC0003DMT400000740	Uncharacterized protein; YA5
4113.PGSC0003DMT400000259	Uncharacterized protein; Conserved gene of unknown function
4113.PGSC0003DMT400026641	DNA repair and recombination protein RAD26
4113.PGSC0003DMT400083778	Peptidylprolyl isomerase; CONSTANS interacting protein 3
4113.PGSC0003DMT400005836	Uncharacterized protein; Transcription factor AP2-EREBP
4113.PGSC0003DMT400078521	Uncharacterized protein; Conserved gene of unknown function
4113.PGSC0003DMT400007043	Uncharacterized protein; Delta14-sterol reductase
4113.PGSC0003DMT400078243	Protein kinase
4113.PGSC0003DMT400041830	Uncharacterized protein; Conserved gene of unknown function
4113.PGSC0003DMT400058866	Membrane protein
4113.PGSC0003DMT400042742	Stress enhanced protein 2
4113.PGSC0003DMT400007199	Uncharacterized protein; Sulfotransferase
4113.PGSC0003DMT400026697	Adaptin ear-binding coat-associated protein
4113.PGSC0003DMT400035462	Uncharacterized protein; Conserved gene of unknown function
4113.PGSC0003DMT400011931	50S ribosomal protein L18, chloroplast
4113.PGSC0003DMT400033079	Uncharacterized protein; Conserved gene of unknown function
4113.PGSC0003DMT400028690	Uncharacterized protein; Enolase
4113.PGSC0003DMT400040211	Uncharacterized protein; UPA23
4113.PGSC0003DMT400023280	Uncharacterized protein; Stachyose synthase
4113.PGSC0003DMT400025493	Uncharacterized protein; Receptor kinase
4113.PGSC0003DMT400051792	Wound-induced basic protein
4113.PGSC0003DMT400071831	Uncharacterized protein; CDC45 (Cell division cycle 45)
4113.PGSC0003DMT400005712	Exostosin family protein
4113.PGSC0003DMT400049413	Uncharacterized protein; Tropinone reductase
4113.PGSC0003DMT400060854	Uncharacterized protein; Conserved gene of unknown function
4113.PGSC0003DMT400025123	Uncharacterized protein; Purine transporter
4113.PGSC0003DMT400007048	Uncharacterized protein; Enolase
4113.PGSC0003DMT400065739	Uncharacterized protein; GTP-binding protein involved in protein trafficking; may modulate vesicle budding and uncoating within the Golgi apparatus; Belongs to the small GTPase superfamily. Arf family
4113.PGSC0003DMT400064198	Uncharacterized protein; Prolyl 4-hydroxylase
4113.PGSC0003DMT400063771	Uncharacterized protein; GATA transcription factor
4113.PGSC0003DMT400072766	Uncharacterized protein; Argininosuccinate synthase
4113.PGSC0003DMT400028899	Uncharacterized protein; ATPP2-A13
4113.PGSC0003DMT400054822	Leucine-rich repeat family protein
4113.PGSC0003DMT400023094	Uncharacterized protein; Bipolar kinesin KRP-130; Belongs to the TRAFAC class myosin-kinesin ATPase superfamily. Kinesin family
4113.PGSC0003DMT400007049	Uncharacterized protein; Peroxiredoxin
4113.PGSC0003DMT400055488	Phenylalanine ammonia-lyase
4113.PGSC0003DMT400072641	Uncharacterized protein; Peroxiredoxin
4113.PGSC0003DMT400009031	Uncharacterized protein; GATA transcription factor
4113.PGSC0003DMT400067326	DNA cross-link repair protein pso2/snm1
4113.PGSC0003DMT400006898	Uncharacterized protein; Conserved gene of unknown function
4113.PGSC0003DMT400044551	Uncharacterized protein; Conserved gene of unknown function
4113.PGSC0003DMT400026129	Uncharacterized protein; Geraniol 10-hydroxylase; Belongs to the cytochrome P450 family
4113.PGSC0003DMT400025161	Uncharacterized protein; Conserved gene of unknown function
4113.PGSC0003DMT400001066	Uncharacterized protein; Osmotin
4113.PGSC0003DMT400007050	Uncharacterized protein; Cellulose synthase-like A1
4113.PGSC0003DMT400047969	Methyltransferase; S-adenosyl-methionine-sterol-C-methyltransferase; Belongs to the class I-like SAM-binding methyltransferase superfamily. Erg6/SMT family
4113.PGSC0003DMT400092434	Uncharacterized protein; Short-chain type alcohol dehydrogenase; Belongs to the short-chain dehydrogenases/reductases (SDR) family
4113.PGSC0003DMT400009471	Uncharacterized protein; Phenylcoumaran benzylic ether reductase
4113.PGSC0003DMT400035464	DNA helicase; Mini-chromosome maintenance protein MCM6; Belongs to the MCM family
4113.PGSC0003DMT400060048	Uncharacterized protein; Alcohol dehydrogenase
4113.PGSC0003DMT400037619	BZIP protein
4113.PGSC0003DMT400004180	Uncharacterized protein; Aldo-keto reductase
4113.PGSC0003DMT400033391	Uncharacterized protein; Class II ethylene responsive element binding factor
4113.PGSC0003DMT400046598	F-box family protein
4113.PGSC0003DMT400022679	Uncharacterized protein; Major latex
4113.PGSC0003DMT400064160	Uncharacterized protein; ATP phosphoribosyl transferase
4113.PGSC0003DMT400050836	ATP binding protein
4113.PGSC0003DMT400034544	Uncharacterized protein; Acyltransferase
4113.PGSC0003DMT400009695	Uncharacterized protein; Fragment
4113.PGSC0003DMT400003980	HB2 homeodomain protein
4113.PGSC0003DMT400018869	H/ACA ribonucleoprotein complex subunit 4
4113.PGSC0003DMT400041054	Uncharacterized protein; Alpha-glucosidase; Belongs to the glycosyl hydrolase 31 family
4113.PGSC0003DMT400031199	Non-specific lipid-transfer protein; Plant non-specific lipid-transfer proteins transfer phospholipids as well as galactolipids across membranes. May play a role in wax or cutin deposition in the cell walls of expanding epidermal cells and certain secretory tissues
4113.PGSC0003DMT400041748	ATP binding protein; Belongs to the TRAFAC class myosin-kinesin ATPase superfamily. Kinesin family
4113.PGSC0003DMT400027884	Uncharacterized protein; Conserved gene of unknown function
4113.PGSC0003DMT400063823	Uncharacterized protein; Maltose transporter
4113.PGSC0003DMT400014749	Uncharacterized protein; Phosphoethanolamine N-methyltransferase
4113.PGSC0003DMT400027602	Uncharacterized protein; Pheophorbide A oxygenase
4113.PGSC0003DMT400059693	Uncharacterized protein; Amino acid transporter
4113.PGSC0003DMT400064075	Probable magnesium transporter; Acts as a Mg(2+) transporter. Can also transport other divalent cations such as Fe(2+), Sr(2+), Ba(2+), Mn(2+) and Co(2+) but to a much less extent than Mg(2+)
4113.PGSC0003DMT400038473	Proline-rich protein
4113.PGSC0003DMT400017948	Zinc finger family protein
4113.PGSC0003DMT400046159	Glycine-rich protein
4113.PGSC0003DMT400000004	Uncharacterized protein; Vacuolar iron family transporter
4113.PGSC0003DMT400003412	Uncharacterized protein; Mitochondrial saccharopine dehydrogenase
4113.PGSC0003DMT400033657	Protein kinase
4113.PGSC0003DMT400005571	Uncharacterized protein; Glutathione S-transferase; Belongs to the GST superfamily
4113.PGSC0003DMT400001072	Histone H4; Core component of nucleosome. Nucleosomes wrap and compact DNA into chromatin, limiting DNA accessibility to the cellular machineries which require DNA as a template. Histones thereby play a central role in transcription regulation, DNA repair, DNA replication and chromosomal stability. DNA accessibility is regulated via a complex set of post-translational modifications of histones, a…
4113.PGSC0003DMT400052310	Uncharacterized protein; Conserved gene of unknown function
4113.PGSC0003DMT400055885	Uncharacterized protein; Conserved gene of unknown function
4113.PGSC0003DMT400049814	ATP binding protein
4113.PGSC0003DMT400025854	Uncharacterized protein; Cyclin B; Belongs to the cyclin family
4113.PGSC0003DMT400048871	Uncharacterized protein; Alpha-L-fucosidase 2; Belongs to the 'GDSL' lipolytic enzyme family
4113.PGSC0003DMT400078378	Origin of replication complex subunit 4; Component of the origin recognition complex (ORC) that binds origins of replication
4113.PGSC0003DMT400018137	Uncharacterized protein; Ethylene-responsive transcription factor ERF023
4113.PGSC0003DMT400061254	Uncharacterized protein; Fatty acid desaturase
4113.PGSC0003DMT400026984	Uncharacterized protein; Oxidoreductase
4113.PGSC0003DMT400062238	Pyruvate kinase isozyme G, chloroplastic; Belongs to the pyruvate kinase family
4113.PGSC0003DMT400009380	Uncharacterized protein; Ascorbate peroxidase; Belongs to the peroxidase family
4113.PGSC0003DMT400005933	Uncharacterized protein; Glucan endo-1,3-beta-glucosidase; Belongs to the glycosyl hydrolase 17 family
4113.PGSC0003DMT400064670	6-phosphogluconate dehydrogenase, decarboxylating; Catalyzes the oxidative decarboxylation of 6- phosphogluconate to ribulose 5-phosphate and CO(2), with concomitant reduction of NADP to NADPH; Belongs to the 6-phosphogluconate dehydrogenase family
4113.PGSC0003DMT400052105	Uncharacterized protein; Conserved gene of unknown function
4113.PGSC0003DMT400011028	Uncharacterized protein; Stellacyanin
4113.PGSC0003DMT400069487	Uncharacterized protein; Transaminase mtnE
4113.PGSC0003DMT400034099	Uncharacterized protein; Conserved gene of unknown function
4113.PGSC0003DMT400049812	Uncharacterized protein; Conserved gene of unknown function
4113.PGSC0003DMT400018808	Uncharacterized protein; Kinesin heavy chain; Belongs to the TRAFAC class myosin-kinesin ATPase superfamily. Kinesin family
4113.PGSC0003DMT400044163	Succinic semialdehyde dehydrogenase; Belongs to the aldehyde dehydrogenase family
4113.PGSC0003DMT400063677	Histone H2A.1
4113.PGSC0003DMT400062969	Kinesin-like protein; Chromosome-associated kinesin KIF4A; Belongs to the TRAFAC class myosin-kinesin ATPase superfamily. Kinesin family
4113.PGSC0003DMT400060449	60S ribosomal protein L35
4113.PGSC0003DMT400001476	Uncharacterized protein; UP-9A
4113.PGSC0003DMT400029369	Uncharacterized protein; Conserved gene of unknown function
4113.PGSC0003DMT400041701	Methylenetetrahydrofolate reductase
4113.PGSC0003DMT400075456	Uncharacterized protein; Resveratrol/hydroxycinnamic acid O-glucosyltransferase
4113.PGSC0003DMT400009994	Uncharacterized protein; Copper chaperone
4113.PGSC0003DMT400021263	Uncharacterized protein; Acylamino-acid-releasing enzyme
4113.PGSC0003DMT400048153	Uncharacterized protein; Aldehyde oxidase
4113.PGSC0003DMT400080247	Non-specific lipid-transfer protein; Plant non-specific lipid-transfer proteins transfer phospholipids as well as galactolipids across membranes. May play a role in wax or cutin deposition in the cell walls of expanding epidermal cells and certain secretory tissues
4113.PGSC0003DMT400018853	Uncharacterized protein; 3beta-hydroxysteroid-dehydrogenase/decarboxylase isoform 2
4113.PGSC0003DMT400019806	Salicylic acid-binding protein 2
4113.PGSC0003DMT400041032	Uncharacterized protein; Conserved gene of unknown function
4113.PGSC0003DMT400047177	Uncharacterized protein; Beta-expansin 3; Belongs to the expansin family
4113.PGSC0003DMT400075349	Cyclin-dependent protein kinase p34cdc2; Belongs to the protein kinase superfamily
4113.PGSC0003DMT400064873	Uncharacterized protein; Conserved gene of unknown function
4113.PGSC0003DMT400057317	Uncharacterized protein; Oleosin 5
4113.PGSC0003DMT400034385	Uncharacterized protein; Anthocyanin acyltransferase
4113.PGSC0003DMT400001475	Uncharacterized protein; UP-9A
4113.PGSC0003DMT400039488	Uncharacterized protein; Phospholipase C 4
4113.PGSC0003DMT400052239	Uncharacterized protein; Conserved gene of unknown function
4113.PGSC0003DMT400040794	Ribosomal protein L25
4113.PGSC0003DMT400027765	Serine-threonine protein kinase, plant-type
4113.PGSC0003DMT400018994	Uncharacterized protein; 2-oxoglutarate/malate translocator, chloroplast
4113.PGSC0003DMT400060565	Uncharacterized protein; Ubiquitin thiolesterase
4113.PGSC0003DMT400032391	Uncharacterized protein; D-alanine aminotransferase
4113.PGSC0003DMT400020260	Glycosyltransferase; Zeatin O-glucosyltransferase; Belongs to the UDP-glycosyltransferase family
4113.PGSC0003DMT400009589	Uncharacterized protein; Ornithine carbamoyltransferase; Belongs to the ATCase/OTCase family
4113.PGSC0003DMT400055784	Uncharacterized protein; Epoxide hydrolase
4113.PGSC0003DMT400081214	SAUR family protein
4113.PGSC0003DMT400051945	Uncharacterized protein; Cytochrome b5
4113.PGSC0003DMT400037075	Uncharacterized protein; Flap endonuclease GEN-like 2
4113.PGSC0003DMT400065091	Serine-threonine protein kinase, plant-type
4113.PGSC0003DMT400008457	Uncharacterized protein; Conserved gene of unknown function; Belongs to the tetraspanin (TM4SF) family
4113.PGSC0003DMT400001474	Uncharacterized protein; UP-9A
4113.PGSC0003DMT400041542	Non-specific lipid-transfer protein; Plant non-specific lipid-transfer proteins transfer phospholipids as well as galactolipids across membranes. May play a role in wax or cutin deposition in the cell walls of expanding epidermal cells and certain secretory tissues
4113.PGSC0003DMT400087395	UDP-glucose 6-dehydrogenase
4113.PGSC0003DMT400071770	Uncharacterized protein; Inositol-3-phosphate synthase
4113.PGSC0003DMT400069195	Calcium-binding protein
4113.PGSC0003DMT400000152	Uncharacterized protein; GPAT
4113.PGSC0003DMT400037843	Uncharacterized protein; Lyase
4113.PGSC0003DMT400009481	50S ribosomal protein L31; Belongs to the bacterial ribosomal protein bL31 family
4113.PGSC0003DMT400050235	Uncharacterized protein; NAD-malate dehydrogenase
4113.PGSC0003DMT400056629	CBL-interacting protein kinase 08
4113.PGSC0003DMT400065103	DNA-binding protein MNB1B
4113.PGSC0003DMT400062083	Uncharacterized protein; Conserved gene of unknown function
4113.PGSC0003DMT400050580	Uncharacterized protein; Glycosyltransferase
4113.PGSC0003DMT400045701	Uncharacterized protein; Conserved gene of unknown function
4113.PGSC0003DMT400009227	Uncharacterized protein; Rac-like GTPase 1; Belongs to the small GTPase superfamily. Rho family
4113.PGSC0003DMT400077488	MLO-like protein; May be involved in modulation of pathogen defense and leaf cell death
4113.PGSC0003DMT400089872	Uncharacterized protein; Conserved gene of unknown function
4113.PGSC0003DMT400042492	Arogenate dehydratase; Converts the prephenate produced from the shikimate- chorismate pathway into phenylalanine
4113.PGSC0003DMT400034084	Uncharacterized protein; Germin 12
4113.PGSC0003DMT400020595	Dem protein
4113.PGSC0003DMT400012247	Low molecular weight heat shock protein; Belongs to the small heat shock protein (HSP20) family
4113.PGSC0003DMT400000154	Uncharacterized protein; Sialin
4113.PGSC0003DMT400029570	Rapid alkalinization factor preproprotein
4113.PGSC0003DMT400009483	Uncharacterized protein; Conserved gene of unknown function
4113.PGSC0003DMT400078369	Uncharacterized protein; Histone chaperone ASF1A
4113.PGSC0003DMT400062489	Auxin response factor; Auxin response factors (ARFs) are transcriptional factors that bind specifically to the DNA sequence 5'-TGTCTC-3' found in the auxin-responsive promoter elements (AuxREs)
4113.PGSC0003DMT400072512	Leucine-rich repeat protein
4113.PGSC0003DMT400012763	Uncharacterized protein; Phosphopentothenoylcysteine decarboxylase
4113.PGSC0003DMT400006798	Auxin-responsive protein; Aux/IAA proteins are short-lived transcriptional factors that function as repressors of early auxin response genes at low auxin concentrations
4113.PGSC0003DMT400043146	Protein phosphatase 2C AHG3 homolog
4113.PGSC0003DMT400076602	Uncharacterized protein; Farnesyl pyrophosphate synthase; Belongs to the FPP/GGPP synthase family
4113.PGSC0003DMT400016362	Serine hydroxymethyltransferase; Interconversion of serine and glycine; Belongs to the SHMT family
4113.PGSC0003DMT400057428	Microtubule-associated protein MAP65-1a
4113.PGSC0003DMT400072939	Uncharacterized protein; Hydrolase, hydrolyzing O-glycosyl compounds
4113.PGSC0003DMT400027673	B3 domain-containing protein
4113.PGSC0003DMT400001020	Pollen-specific kinase partner protein
4113.PGSC0003DMT400054175	LRR receptor-like serine/threonine-protein kinase
4113.PGSC0003DMT400050131	Stress-associated protein 7
4113.PGSC0003DMT400045319	Uncharacterized protein; Conserved gene of unknown function
4113.PGSC0003DMT400026989	Kinase family protein
4113.PGSC0003DMT400042417	Lactoylglutathione lyase; Catalyzes the conversion of hemimercaptal, formed from methylglyoxal and glutathione, to S-lactoylglutathione
4113.PGSC0003DMT400052308	CBS domain-containing protein
4113.PGSC0003DMT400066895	Uncharacterized protein; Leucine-rich repeat receptor kinase
4113.PGSC0003DMT400034860	Uncharacterized protein; Conserved gene of unknown function
4113.PGSC0003DMT400058855	E3 ubiquitin-protein ligase BAH1-like 1
4113.PGSC0003DMT400072395	Serine/threonine protein kinase
4113.PGSC0003DMT400019618	Uncharacterized protein; Conserved gene of unknown function
4113.PGSC0003DMT400032971	Protein DETOXIFICATION; Multidrug resistance pump; Belongs to the multi antimicrobial extrusion (MATE) (TC 2.A.66.1) family
4113.PGSC0003DMT400043159	Uncharacterized protein; Short chain alcohol dehydrogenase
4113.PGSC0003DMT400065964	Uncharacterized protein; Potassium channel NtKC1
4113.PGSC0003DMT400003010	Heat shock protein binding protein
4113.PGSC0003DMT400052088	Ankyrin repeat-containing protein
4113.PGSC0003DMT400068505	Uncharacterized protein; Importin beta-1
4113.PGSC0003DMT400070424	Uncharacterized protein; Vicilin
4113.PGSC0003DMT400057690	Uncharacterized protein; MYB transcription factor
4113.PGSC0003DMT400012544	Uncharacterized protein; Allyl alcohol dehydrogenase
4113.PGSC0003DMT400000500	Uncharacterized protein; Origin recognition complex 5 subunit
4113.PGSC0003DMT400007803	Uncharacterized protein; Beta-D-glucan exohydrolase
4113.PGSC0003DMT400015058	Ferredoxin; Ferredoxins are iron-sulfur proteins that transfer electrons in a wide variety of metabolic reactions
4113.PGSC0003DMT400052662	Uncharacterized protein; Conserved gene of unknown function
4113.PGSC0003DMT400069470	40S ribosomal protein S29
4113.PGSC0003DMT400045208	Senescence-associated protein 5; Belongs to the tetraspanin (TM4SF) family
4113.PGSC0003DMT400038486	Uncharacterized protein; Conserved gene of unknown function
4113.PGSC0003DMT400058913	Uncharacterized protein; Ptm1
4113.PGSC0003DMT400042488	Uncharacterized protein; Adenylyl-sulfate reductase
4113.PGSC0003DMT400003261	Uncharacterized protein; Conserved gene of unknown function
4113.PGSC0003DMT400020475	Uncharacterized protein; Inorganic pyrophosphatase
4113.PGSC0003DMT400059832	Elongation factor 1-alpha; This protein promotes the GTP-dependent binding of aminoacyl-tRNA to the A-site of ribosomes during protein biosynthesis
4113.PGSC0003DMT400005133	Uncharacterized protein; Bipolar kinesin KRP-130; Belongs to the TRAFAC class myosin-kinesin ATPase superfamily. Kinesin family
4113.PGSC0003DMT400032385	Ring finger protein
4113.PGSC0003DMT400074023	ATP binding protein
4113.PGSC0003DMT400033356	Protein kinase (PK)
4113.PGSC0003DMT400044451	AT-hook motif nuclear-localized protein; Transcription factor that specifically binds AT-rich DNA sequences related to the nuclear matrix attachment regions (MARs)
4113.PGSC0003DMT400073086	Leucine-rich repeat family protein
4113.PGSC0003DMT400026536	Uncharacterized protein; Conserved gene of unknown function
4113.PGSC0003DMT400076930	Uncharacterized protein; Conserved gene of unknown function
4113.PGSC0003DMT400062844	DNA binding protein
4113.PGSC0003DMT400057328	BTB/POZ domain-containing protein
4113.PGSC0003DMT400068330	Uncharacterized protein; Conserved gene of unknown function
4113.PGSC0003DMT400065051	ATP binding protein
4113.PGSC0003DMT400046807	Receptor protein kinase
4113.PGSC0003DMT400008687	60S ribosomal protein L12; Belongs to the universal ribosomal protein uL11 family
4113.PGSC0003DMT400041856	Uncharacterized protein; Acetolactate synthase
4113.PGSC0003DMT400001378	Uncharacterized protein; Stachyose synthase
4113.PGSC0003DMT400036628	Zinc finger protein
4113.PGSC0003DMT400056111	GTP-binding protein
4113.PGSC0003DMT400065110	Uncharacterized protein; Homoserine kinase
4113.PGSC0003DMT400067654	Uncharacterized protein; ROPGEF5 (ROP GUANINE NUCLEOTIDE EXCHANGE FACTOR 5)
4113.PGSC0003DMT400082079	Non-specific lipid-transfer protein; Belongs to the plant LTP family
4113.PGSC0003DMT400038056	Dimethylaniline monooxygenase
4113.PGSC0003DMT400062501	Uncharacterized protein; Conserved gene of unknown function
4113.PGSC0003DMT400011344	Peptidyl-prolyl cis-trans isomerase; PPIases accelerate the folding of proteins. It catalyzes the cis-trans isomerization of proline imidic peptide bonds in oligopeptides
4113.PGSC0003DMT400067038	ATP binding protein
4113.PGSC0003DMT400052657	Proteasome subunit alpha type; The proteasome is a multicatalytic proteinase complex which is characterized by its ability to cleave peptides with Arg, Phe, Tyr, Leu, and Glu adjacent to the leaving group at neutral or slightly basic pH; Belongs to the peptidase T1A family
4113.PGSC0003DMT400054605	40S ribosomal protein S25-1
4113.PGSC0003DMT400041600	Glycosyltransferase; UDP-rhamnose:rhamnosyltransferase; Belongs to the UDP-glycosyltransferase family
4113.PGSC0003DMT400052237	Leucine-rich repeat protein
4113.PGSC0003DMT400022900	Uncharacterized protein; Nucleic acid-binding, OB-fold
4113.PGSC0003DMT400030651	60S ribosomal protein L27; Belongs to the eukaryotic ribosomal protein eL27 family
4113.PGSC0003DMT400027411	RNA-binding region-containing protein
4113.PGSC0003DMT400038561	Uncharacterized protein; ISWI chromatin remodeling complex ATPase ISW1
4113.PGSC0003DMT400068383	Uncharacterized protein; Conserved gene of unknown function
4113.PGSC0003DMT400074804	Uncharacterized protein; Mta/sah nucleosidase
4113.PGSC0003DMT400063111	Uncharacterized protein; ZPT4-3
4113.PGSC0003DMT400064878	Dehydration-responsive protein RD22
4113.PGSC0003DMT400005558	Uncharacterized protein; Glutathione S-transferase; Belongs to the GST superfamily
4113.PGSC0003DMT400044713	Uncharacterized protein; Ribose-phosphate pyrophosphokinase 4
4113.PGSC0003DMT400017825	Leucine-rich repeat protein
4113.PGSC0003DMT400053670	Ring finger protein
4113.PGSC0003DMT400095838	Uncharacterized protein; Conserved gene of unknown function
4113.PGSC0003DMT400055831	Uncharacterized protein; Thioredoxin
4113.PGSC0003DMT400042257	Uncharacterized protein; Obtusifoliol 14alpha-demethylase; Belongs to the cytochrome P450 family
4113.PGSC0003DMT400052607	6b-interacting protein 1
4113.PGSC0003DMT400058533	Uncharacterized protein; UDP-L-rhamnose synthase
4113.PGSC0003DMT400036630	Uncharacterized protein; Conserved gene of unknown function
4113.PGSC0003DMT400007571	Pyruvate dehydrogenase E1 component subunit alpha; The pyruvate dehydrogenase complex catalyzes the overall conversion of pyruvate to acetyl-CoA and CO(2)
4113.PGSC0003DMT400055055	Acyl-carrier-protein S-malonyltransferase/ transferase
4113.PGSC0003DMT400081378	Uncharacterized protein; DNA photolyase
4113.PGSC0003DMT400009236	Uncharacterized protein; Cell number regulator 13
4113.PGSC0003DMT400026828	Uncharacterized protein; Cytochrome c6, chloroplastic
4113.PGSC0003DMT400055930	Uncharacterized protein; Furin
4113.PGSC0003DMT400005560	Uncharacterized protein; Glutathione S-transferase; Belongs to the GST superfamily
4113.PGSC0003DMT400046369	F-box family protein
4113.PGSC0003DMT400009605	Uncharacterized protein; Taxadien-5-alpha-ol O-acetyltransferase
4113.PGSC0003DMT400033380	Uncharacterized protein; Conserved gene of unknown function
4113.PGSC0003DMT400066543	Uncharacterized protein; Methylthioribose kinase
4113.PGSC0003DMT400026959	TRANSPARENT TESTA 12 protein; Belongs to the multi antimicrobial extrusion (MATE) (TC 2.A.66.1) family
4113.PGSC0003DMT400072948	ATP binding protein
4113.PGSC0003DMT400052606	Uncharacterized protein; Conserved gene of unknown function
4113.PGSC0003DMT400023333	DNA replication licensing factor MCM7; Belongs to the MCM family
4113.PGSC0003DMT400064305	Uncharacterized protein; Conserved gene of unknown function
4113.PGSC0003DMT400036920	Uncharacterized protein; Calnexin
4113.PGSC0003DMT400077257	Ribosomal protein S9; Belongs to the universal ribosomal protein uS9 family
4113.PGSC0003DMT400025547	Uncharacterized protein; Allergen Pru du 2.04
4113.PGSC0003DMT400002189	Uncharacterized protein; Orcinol O-methyltransferase; Belongs to the class I-like SAM-binding methyltransferase superfamily. Cation-independent O- methyltransferase family
4113.PGSC0003DMT400035984	Uncharacterized protein; Multicopper oxidase
4113.PGSC0003DMT400014873	Uncharacterized protein; Valacyclovir hydrolase
4113.PGSC0003DMT400029561	Uncharacterized protein; Glutathione S-transferase APIC; Belongs to the GST superfamily
4113.PGSC0003DMT400065096	Alpha-galactosidase/alpha-n-acetylgalactosaminidase
4113.PGSC0003DMT400017631	SBT4E protein
4113.PGSC0003DMT400079602	Uncharacterized protein; Polygalacturonase-1 non-catalytic subunit beta
4113.PGSC0003DMT400056847	Aspartic proteinase nepenthesin-1; Belongs to the peptidase A1 family
4113.PGSC0003DMT400003401	Uncharacterized protein; Conserved gene of unknown function
4113.PGSC0003DMT400075055	Uncharacterized protein; Conserved gene of unknown function
4113.PGSC0003DMT400037864	DUF26 domain-containing protein 1
4113.PGSC0003DMT400038272	Lipid binding protein
4113.PGSC0003DMT400066619	Proteinase inhibitor 1
4113.PGSC0003DMT400077989	Protein phosphatase 2C
4113.PGSC0003DMT400037341	Fasciclin-like arabinogalactan protein 10
4113.PGSC0003DMT400034766	Uncharacterized protein; Conserved gene of unknown function
4113.PGSC0003DMT400029318	Uncharacterized protein; Catechol O-methyltransferase; Belongs to the class I-like SAM-binding methyltransferase superfamily. Cation-independent O- methyltransferase family
4113.PGSC0003DMT400028289	Uncharacterized protein; Cytosolic acetoacetyl-coenzyme A thiolase; Belongs to the thiolase family
4113.PGSC0003DMT400030855	Uncharacterized protein; Conserved gene of unknown function
4113.PGSC0003DMT400048586	E3 ubiquitin-protein ligase; E3 ubiquitin-protein ligase that mediates ubiquitination and subsequent proteasomal degradation of target proteins. E3 ubiquitin ligases accept ubiquitin from an E2 ubiquitin- conjugating enzyme in the form of a thioester and then directly transfers the ubiquitin to targeted substrates
4113.PGSC0003DMT400057633	Uncharacterized protein; Epoxide hydrolase
4113.PGSC0003DMT400092702	Uncharacterized protein; 4,5-DOPA dioxygenase extradiol
4113.PGSC0003DMT400043098	Uncharacterized protein; Reverse transcriptase
4113.PGSC0003DMT400059923	Uncharacterized protein; NRAMP2
4113.PGSC0003DMT400020839	Auxin response factor; Auxin response factors (ARFs) are transcriptional factors that bind specifically to the DNA sequence 5'-TGTCTC-3' found in the auxin-responsive promoter elements (AuxREs)
4113.PGSC0003DMT400001712	Uncharacterized protein; Conserved gene of unknown function
4113.PGSC0003DMT400057442	Uncharacterized protein; Extracellular ligand-gated ion channel
4113.PGSC0003DMT400065273	Putative cinnamoyl-CoA reductase-like protein; Cinnamoyl-CoA reductase
4113.PGSC0003DMT400011336	ER lumen protein retaining receptor
4113.PGSC0003DMT400074139	Uncharacterized protein; Conserved gene of unknown function
4113.PGSC0003DMT400052231	Uncharacterized protein; Conserved gene of unknown function
4113.PGSC0003DMT400036487	Peroxidase; Belongs to the peroxidase family. Classical plant (class III) peroxidase subfamily
4113.PGSC0003DMT400062986	Uncharacterized protein; Enolase
4113.PGSC0003DMT400018139	Uncharacterized protein; Phosphatidylinositol 3-and 4-kinase family protein
4113.PGSC0003DMT400002448	Uncharacterized protein; Xyloglucan galactosyltransferase KATAMARI1
4113.PGSC0003DMT400029398	Thylakoid membrane phosphoprotein 14 kDa, chloroplastic
4113.PGSC0003DMT400044185	Uncharacterized protein; Acid phosphatase 1
4113.PGSC0003DMT400034885	DUF26 domain-containing protein 2
4113.PGSC0003DMT400032872	Oleosin
4113.PGSC0003DMT400053650	Uncharacterized protein; Rop guanine nucleotide exchange factor
4113.PGSC0003DMT400067353	Uncharacterized protein; Indole-3-acetic acid-amido synthetase GH3.6
4113.PGSC0003DMT400043688	Uncharacterized protein; Conserved gene of unknown function
4113.PGSC0003DMT400013412	Peptidyl-prolyl cis-trans isomerase; PPIases accelerate the folding of proteins. It catalyzes the cis-trans isomerization of proline imidic peptide bonds in oligopeptides
4113.PGSC0003DMT400083993	Zinc finger homeodomain protein SZF-HD1
4113.PGSC0003DMT400079559	Uncharacterized protein; Polygalacturonase non-catalytic subunit AroGP3
4113.PGSC0003DMT400059944	Uncharacterized protein; White-brown-complex ABC transporter family
4113.PGSC0003DMT400050790	OO_Ba0013J05-OO_Ba0033A15.14 protein
4113.PGSC0003DMT400076712	Condensin complex subunit 1; Regulatory subunit of the condensin complex, a complex required for conversion of interphase chromatin into mitotic-like condense chromosomes. The condensin complex probably introduces positive supercoils into relaxed DNA in the presence of type I topoisomerases and converts nicked DNA into positive knotted forms in the presence of type II topoisomerases
4113.PGSC0003DMT400039385	Pectate lyase
4113.PGSC0003DMT400000984	Avr9/Cf-9 rapidly elicited protein 146
4113.PGSC0003DMT400016171	Uncharacterized protein; Beta-glucosidase 01; Belongs to the glycosyl hydrolase 1 family
4113.PGSC0003DMT400006703	Uncharacterized protein; AR791
4113.PGSC0003DMT400033347	Uncharacterized protein; Conserved gene of unknown function
4113.PGSC0003DMT400077561	Uncharacterized protein; 50 kDa ketoavyl-ACP synthase; Belongs to the beta-ketoacyl-ACP synthases family
4113.PGSC0003DMT400015174	Uncharacterized protein; Cytochrome P450
4113.PGSC0003DMT400014444	Uncharacterized protein; UDP-N-acetylglucosamine--N-acetylmuramyl-(Pentapeptide) pyrophosphoryl-undecaprenol N-acetylglucosamine transferase
4113.PGSC0003DMT400074761	Uncharacterized protein; Conserved gene of unknown function
4113.PGSC0003DMT400030898	DNA helicase; Minichromosome maintenance 5 protein; Belongs to the MCM family
4113.PGSC0003DMT400004842	F-box and wd40 domain protein
4113.PGSC0003DMT400035001	Uncharacterized protein; Mitochondrial import receptor subunit TOM22 homolog 2
4113.PGSC0003DMT400039812	Uncharacterized protein; Peptide N-glycanase
4113.PGSC0003DMT400081387	Uncharacterized protein; Conserved gene of unknown function
4113.PGSC0003DMT400032938	LOB domain-containing protein 41
4113.PGSC0003DMT400073435	Uncharacterized protein; Jp18
4113.PGSC0003DMT400028720	Uncharacterized protein; An Arabidopsis thialiana chromosome BAC genomic sequence
4113.PGSC0003DMT400023126	Carbonic anhydrase family protein
4113.PGSC0003DMT400082123	Uncharacterized protein; Conserved gene of unknown function
4113.PGSC0003DMT400053073	Uncharacterized protein; Werner syndrome ATP-dependent helicase
4113.PGSC0003DMT400025673	Uncharacterized protein; Conserved gene of unknown function
4113.PGSC0003DMT400045724	Uncharacterized protein; Zinc/iron transporter
4113.PGSC0003DMT400039509	Serine-threonine protein kinase, plant-type
4113.PGSC0003DMT400063862	Uncharacterized protein; R2r3-myb transcription factor
4113.PGSC0003DMT400014442	Uncharacterized protein; Conserved gene of unknown function
4113.PGSC0003DMT400031954	Protein ABIL2
4113.PGSC0003DMT400062991	Uncharacterized protein; MIS12 homologue
4113.PGSC0003DMT400002449	Reticulon family protein
4113.PGSC0003DMT400039213	Uncharacterized protein; Nodulation receptor kinase
4113.PGSC0003DMT400032878	Cell division cycle protein cdt2
4113.PGSC0003DMT400047497	Neutral amino acid transport protein
4113.PGSC0003DMT400061634	Uncharacterized protein; Conserved gene of unknown function
4113.PGSC0003DMT400067725	Uncharacterized protein; Conserved gene of unknown function
4113.PGSC0003DMT400072721	Flavonol 4'-sulfotransferase; Belongs to the sulfotransferase 1 family
4113.PGSC0003DMT400034713	Uncharacterized protein; Conserved gene of unknown function
4113.PGSC0003DMT400058304	Actin binding protein; Belongs to the formin-like family
4113.PGSC0003DMT400003391	Uncharacterized protein; Conserved gene of unknown function
4113.PGSC0003DMT400029771	Protein phosphatase 2c
4113.PGSC0003DMT400016219	Uncharacterized protein; Sodium/potassium/calcium exchanger
4113.PGSC0003DMT400020700	DNA binding protein
4113.PGSC0003DMT400009410	Aspartic proteinase nepenthesin-2; Belongs to the peptidase A1 family
4113.PGSC0003DMT400024409	Uncharacterized protein; Heavy metal ATPase
4113.PGSC0003DMT400017965	B2 protein
4113.PGSC0003DMT400028716	Uncharacterized protein; Conserved gene of unknown function
4113.PGSC0003DMT400040181	Uncharacterized protein; Bipolar kinesin KRP-130; Belongs to the TRAFAC class myosin-kinesin ATPase superfamily. Kinesin family
4113.PGSC0003DMT400057629	Uncharacterized protein; Sugar transporter; Belongs to the major facilitator superfamily. Sugar transporter (TC 2.A.1.1) family
4113.PGSC0003DMT400001093	Uncharacterized protein; Shugoshin-1
4113.PGSC0003DMT400011905	Uncharacterized protein; Kinesin; Belongs to the TRAFAC class myosin-kinesin ATPase superfamily. Kinesin family
4113.PGSC0003DMT400019726	GAST1 protein
4113.PGSC0003DMT400061198	Uncharacterized protein; Isoamyl acetate-hydrolyzing esterase
4113.PGSC0003DMT400062849	Uncharacterized protein; Conserved gene of unknown function
4113.PGSC0003DMT400016988	Uncharacterized protein; Sugar transporter; Belongs to the major facilitator superfamily. Sugar transporter (TC 2.A.1.1) family
4113.PGSC0003DMT400019561	Uncharacterized protein; Cytochrome P450
4113.PGSC0003DMT400078610	ATP synthase subunit beta; Produces ATP from ADP in the presence of a proton gradient across the membrane
4113.PGSC0003DMT400087883	Centromere protein
4113.PGSC0003DMT400073335	Uncharacterized protein; Conserved gene of unknown function
4113.PGSC0003DMT400000605	Uncharacterized protein; Chitinase
4113.PGSC0003DMT400048017	Axi 1 protein
4113.PGSC0003DMT400079636	Stress-associated protein 8
4113.PGSC0003DMT400011651	Uncharacterized protein; Transcription factor bHLH62
4113.PGSC0003DMT400065346	LOB domain protein 1
4113.PGSC0003DMT400056323	Uncharacterized protein; Gene of unknown function
4113.PGSC0003DMT400035284	Glycosyltransferase; UDP-glucosyltransferase; Belongs to the UDP-glycosyltransferase family
4113.PGSC0003DMT400052226	ATP binding protein; Belongs to the AAA ATPase family
4113.PGSC0003DMT400064236	Uncharacterized protein; AtEB1c
4113.PGSC0003DMT400006173	Uncharacterized protein; NPH3 (NON-PHOTOTROPIC HYPOCOTYL 3); Belongs to the NPH3 family
4113.PGSC0003DMT400007503	Protein kinase APK1B, chloroplast; Belongs to the protein kinase superfamily
4113.PGSC0003DMT400001097	Uncharacterized protein; Conserved gene of unknown function
4113.PGSC0003DMT400009915	Acylphosphatase; Belongs to the acylphosphatase family
4113.PGSC0003DMT400024218	Protein VERNALIZATION-INSENSITIVE
4113.PGSC0003DMT400063183	Microtubule-associated protein TORTIFOLIA1
4113.PGSC0003DMT400057174	Uncharacterized protein; Imidazole glycerol phosphate synthase subunit hisf; Belongs to the HisA/HisF family
4113.PGSC0003DMT400057936	Uncharacterized protein; Deoxyuridine 5'-triphosphate nucleotidohydrolase
4113.PGSC0003DMT400073795	AT-hook motif nuclear-localized protein; Transcription factor that specifically binds AT-rich DNA sequences related to the nuclear matrix attachment regions (MARs)
4113.PGSC0003DMT400044289	Uncharacterized protein; Conserved gene of unknown function
4113.PGSC0003DMT400068494	AvrPto-dependent Pto-interacting protein 3
4113.PGSC0003DMT400046955	Uncharacterized protein; Hydrolase
4113.PGSC0003DMT400000391	ATP binding protein
4113.PGSC0003DMT400049593	Kinesin-like protein; Kinesin; Belongs to the TRAFAC class myosin-kinesin ATPase superfamily. Kinesin family
4113.PGSC0003DMT400002201	Uncharacterized protein; Conserved gene of unknown function
4113.PGSC0003DMT400019358	Uncharacterized protein; Pyruvate dehydrogenase E1 beta subunit
4113.PGSC0003DMT400069293	Uncharacterized protein; Gene of unknown function
4113.PGSC0003DMT400049292	Uncharacterized protein; Short-chain dehydrogenase; Belongs to the short-chain dehydrogenases/reductases (SDR) family
4113.PGSC0003DMT400012233	L-lactate dehydrogenase; Gene of unknown function; Belongs to the LDH/MDH superfamily
4113.PGSC0003DMT400081311	Uncharacterized protein; Epoxide hydrolase
4113.PGSC0003DMT400061600	Diphosphomevalonate decarboxylase; Performs the first committed step in the biosynthesis of isoprene-containing compounds such as sterols and terpenoids
4113.PGSC0003DMT400040116	Uncharacterized protein; Chitinase 1; Belongs to the glycosyl hydrolase 18 family
4113.PGSC0003DMT400052984	Uncharacterized protein; Gamma interferon inducible lysosomal thiol reductase family protein
4113.PGSC0003DMT400049690	Uncharacterized protein; 2-methyl-6-phytylbenzoquinone methyltranferase; Belongs to the class I-like SAM-binding methyltransferase superfamily. MPBQ/MBSQ MT family
4113.PGSC0003DMT400079121	Uncharacterized protein; MRNA, clone: RAFL25-31-I24
4113.PGSC0003DMT400045958	C2 domain-containing protein
4113.PGSC0003DMT400037702	Uncharacterized protein; Monoglyceride lipase
4113.PGSC0003DMT400002249	Serine carboxypeptidase-like enzyme; Belongs to the peptidase S10 family
4113.PGSC0003DMT400016637	Uncharacterized protein; Conserved gene of unknown function
4113.PGSC0003DMT400065310	Uncharacterized protein; Peptide transporter
4113.PGSC0003DMT400082806	ADP,ATP carrier protein; Belongs to the mitochondrial carrier (TC 2.A.29) family
4113.PGSC0003DMT400067210	Uncharacterized protein; ABC transporter; Belongs to the ABC transporter superfamily. ABCG family. PDR (TC 3.A.1.205) subfamily
4113.PGSC0003DMT400041157	Uncharacterized protein; Aldo/keto reductase
4113.PGSC0003DMT400035521	Peroxidase 7; Belongs to the peroxidase family. Classical plant (class III) peroxidase subfamily
4113.PGSC0003DMT400079606	Uncharacterized protein; Alcohol dehydrogenase
4113.PGSC0003DMT400066553	Uncharacterized protein; Tic21
4113.PGSC0003DMT400023568	Uncharacterized protein; Calcium sensor calcineurin B
4113.PGSC0003DMT400061738	Gtpase activating protein
4113.PGSC0003DMT400017859	Avr9/Cf-9 rapidly elicited protein 126
4113.PGSC0003DMT400074768	CBL-interacting protein kinase 13
4113.PGSC0003DMT400056866	Serine/threonine protein kinase
4113.PGSC0003DMT400079740	Uncharacterized protein; Conserved gene of unknown function
4113.PGSC0003DMT400062163	Uncharacterized protein; MurB reductase
4113.PGSC0003DMT400040074	Uncharacterized protein; GATA transcription factor
4113.PGSC0003DMT400070626	Uncharacterized protein; Ribonuclease t2; Belongs to the RNase T2 family
4113.PGSC0003DMT400066112	Pyruvate kinase; Belongs to the pyruvate kinase family
4113.PGSC0003DMT400055932	Uncharacterized protein; Conserved gene of unknown function
4113.PGSC0003DMT400060928	Uncharacterized protein; Diphosphoinositol polyphosphate phosphohydrolase
4113.PGSC0003DMT400036744	Uncharacterized protein; Transferase, transferring glycosyl groups
4113.PGSC0003DMT400010093	Uncharacterized protein; Conserved gene of unknown function
4113.PGSC0003DMT400011996	Kinesin-like protein; Kif4; Belongs to the TRAFAC class myosin-kinesin ATPase superfamily. Kinesin family
4113.PGSC0003DMT400009620	Ubiquitin carrier protein; Belongs to the ubiquitin-conjugating enzyme family
4113.PGSC0003DMT400031854	Uncharacterized protein; Conserved gene of unknown function
4113.PGSC0003DMT400081264	Uncharacterized protein; Conserved gene of unknown function
4113.PGSC0003DMT400080291	60S ribosomal protein L34
4113.PGSC0003DMT400067211	Serine/threonine protein phosphatase 2A regulatory subunit; The B regulatory subunit might modulate substrate selectivity and catalytic activity, and also might direct the localization of the catalytic enzyme to a particular subcellular compartment
4113.PGSC0003DMT400067774	Ferredoxin; Ferredoxins are iron-sulfur proteins that transfer electrons in a wide variety of metabolic reactions
4113.PGSC0003DMT400031965	Auxin response factor; Auxin response factors (ARFs) are transcriptional factors that bind specifically to the DNA sequence 5'-TGTCTC-3' found in the auxin-responsive promoter elements (AuxREs)
4113.PGSC0003DMT400078487	Uncharacterized protein; Chloroplast-targeted copper chaperone
4113.PGSC0003DMT400057521	Peroxidase; Suberization-associated anionic peroxidase 2; Belongs to the peroxidase family. Classical plant (class III) peroxidase subfamily
4113.PGSC0003DMT400068959	Uncharacterized protein; Ethylene-responsive transcription factor 4
4113.PGSC0003DMT400061629	Uncharacterized protein; Conserved gene of unknown function
4113.PGSC0003DMT400063542	Formin-like protein; Formin 11; Belongs to the formin-like family
4113.PGSC0003DMT400034706	Ubiquitin ligase protein cop1
4113.PGSC0003DMT400083218	Uncharacterized protein; Aspartate kinase
4113.PGSC0003DMT400033126	Transmembrane protein 14
4113.PGSC0003DMT400004156	Ubiquitin-protein ligase BRE1A
4113.PGSC0003DMT400081294	Uncharacterized protein; ROX1
4113.PGSC0003DMT400070774	DNA topoisomerase; Introduces a single-strand break via transesterification at a target site in duplex DNA. Releases the supercoiling and torsional tension of DNA introduced during the DNA replication and transcription by transiently cleaving and rejoining one strand of the DNA duplex. The scissile phosphodiester is attacked by the catalytic tyrosine of the enzyme, resulting in the formation of a…
4113.PGSC0003DMT400042165	Uncharacterized protein; Monosaccharide transporter 1; Belongs to the major facilitator superfamily. Sugar transporter (TC 2.A.1.1) family
4113.PGSC0003DMT400069866	Laccase; Lignin degradation and detoxification of lignin-derived products; Belongs to the multicopper oxidase family
4113.PGSC0003DMT400025884	Uncharacterized protein; Conserved gene of unknown function
4113.PGSC0003DMT400077173	Uncharacterized protein; GEM 5
4113.PGSC0003DMT400058477	Uncharacterized protein; GRAS family transcription factor; Belongs to the GRAS family
4113.PGSC0003DMT400042470	Uncharacterized protein; Conserved gene of unknown function
4113.PGSC0003DMT400082125	Uncharacterized protein; Conserved gene of unknown function
4113.PGSC0003DMT400036643	Uncharacterized protein; Conserved gene of unknown function
4113.PGSC0003DMT400036745	Polyphosphoinositide binding protein
4113.PGSC0003DMT400019385	Uncharacterized protein; Conserved gene of unknown function
4113.PGSC0003DMT400072777	Uncharacterized protein; Alpha/beta hydrolase
4113.PGSC0003DMT400052217	Uncharacterized protein; Ribonucleoside-diphosphate reductase small chain
4113.PGSC0003DMT400009425	Uncharacterized protein; Iron ion binding / oxidoreductase/ oxidoreductase, acting on paired donors, with incorporation or reduction of molecular oxygen, 2-oxoglutarate as one donor, and incorporation of one atom each of oxygen into both donors
4113.PGSC0003DMT400051197	Uncharacterized protein; Nadhp hc toxin reductase
4113.PGSC0003DMT400037270	Uncharacterized protein; Serine acetyltransferase 1
4113.PGSC0003DMT400015088	Harpin-induced protein 1 containing protein
4113.PGSC0003DMT400032694	Uncharacterized protein; Caspase
4113.PGSC0003DMT400040286	Uncharacterized protein; Conserved gene of unknown function
4113.PGSC0003DMT400000176	Uncharacterized protein; Conserved gene of unknown function
4113.PGSC0003DMT400040123	Uncharacterized protein; An Arabidopsis thialiana chromosome BAC genomic sequence
4113.PGSC0003DMT400010029	Uncharacterized protein; Conserved gene of unknown function
4113.PGSC0003DMT400011993	Binding protein
4113.PGSC0003DMT400038779	Uncharacterized protein; Conserved gene of unknown function
4113.PGSC0003DMT400033236	Uncharacterized protein; C-4 sterol methyl oxidase; Belongs to the sterol desaturase family
4113.PGSC0003DMT400056558	Uncharacterized protein; Pax transcription activation domain interacting protein
4113.PGSC0003DMT400007587	Small molecular heat shock protein; Belongs to the small heat shock protein (HSP20) family
4113.PGSC0003DMT400049308	Uncharacterized protein; Dihydroxy-acid dehydratase
4113.PGSC0003DMT400069728	Laccase; Lignin degradation and detoxification of lignin-derived products; Belongs to the multicopper oxidase family
4113.PGSC0003DMT400015090	Harpin-induced family protein
4113.PGSC0003DMT400000952	Peptidase M28 family protein
4113.PGSC0003DMT400008778	DNA-damage-inducible protein f; Belongs to the multi antimicrobial extrusion (MATE) (TC 2.A.66.1) family
4113.PGSC0003DMT400046820	Ribosomal protein L27a; Belongs to the universal ribosomal protein uL15 family
4113.PGSC0003DMT400010463	DNA binding protein
4113.PGSC0003DMT400061547	Biotin carboxyl carrier protein of acetyl-CoA carboxylase
4113.PGSC0003DMT400018456	Histone H2B.1
4113.PGSC0003DMT400071250	Alphavirus core protein family
4113.PGSC0003DMT400002153	Uncharacterized protein; TCP transcription factor
4113.PGSC0003DMT400024390	Uncharacterized protein; Uroporphyrinogen-III synthase
4113.PGSC0003DMT400048479	F-box protein SNE
4113.PGSC0003DMT400095425	Uncharacterized protein; Conserved gene of unknown function
4113.PGSC0003DMT400031665	Uncharacterized protein; Conserved gene of unknown function
4113.PGSC0003DMT400025004	YUP8H12R.2 protein
4113.PGSC0003DMT400001335	Uncharacterized protein; IS10 transposase
4113.PGSC0003DMT400060525	Uncharacterized protein; Leucine Rich Repeat
4113.PGSC0003DMT400060712	Serine-threonine protein kinase, plant-type
4113.PGSC0003DMT400018274	Uncharacterized protein; Gene of unknown function
4113.PGSC0003DMT400001179	Uncharacterized protein; Conserved gene of unknown function
4113.PGSC0003DMT400001148	Glycosyltransferase; Glucosyltransferase; Belongs to the UDP-glycosyltransferase family
4113.PGSC0003DMT400020468	Glycosyltransferase; Zeatin O-glucosyltransferase; Belongs to the UDP-glycosyltransferase family
4113.PGSC0003DMT400072365	Uncharacterized protein; Conserved gene of unknown function
4113.PGSC0003DMT400085597	Uncharacterized protein; Conserved gene of unknown function
4113.PGSC0003DMT400083788	Uncharacterized protein; Gene of unknown function
4113.PGSC0003DMT400076522	Uncharacterized protein; Gene of unknown function
4113.PGSC0003DMT400054412	Esterase/lipase/thioesterase family protein
4113.PGSC0003DMT400083142	Uncharacterized protein; Conserved gene of unknown function
4113.PGSC0003DMT400075714	Uncharacterized protein; Zeatin O-xylosyltransferase; Belongs to the UDP-glycosyltransferase family
4113.PGSC0003DMT400075715	Uncharacterized protein; UDP-glucosyltransferase
4113.PGSC0003DMT400000593	Uncharacterized protein; Arabinogalactan peptide 16
4113.PGSC0003DMT400069972	Uncharacterized protein; Glucosyltransferase
4113.PGSC0003DMT400069851	Uncharacterized protein; Zeatin O-xylosyltransferase
4113.PGSC0003DMT400034984	Uncharacterized protein; AP2/ERF domain-containing transcription factor
4113.PGSC0003DMT400024635	F-box family protein
4113.PGSC0003DMT400079950	Heat-shock protein; Belongs to the small heat shock protein (HSP20) family
4113.PGSC0003DMT400016152	Uncharacterized protein; Conserved gene of unknown function
4113.PGSC0003DMT400070382	Histone H2B
4113.PGSC0003DMT400019237	Uncharacterized protein; SLF-interacting SKP1; Belongs to the SKP1 family
4113.PGSC0003DMT400004427	Uncharacterized protein; Conserved gene of unknown function
4113.PGSC0003DMT400079172	14-3-3 protein; Belongs to the 14-3-3 family
4113.PGSC0003DMT400037469	Uncharacterized protein; Glucan endo-1,3-beta-glucosidase; Belongs to the glycosyl hydrolase 17 family
4113.PGSC0003DMT400033687	Beta-1,3-glucanase, acidic; Belongs to the glycosyl hydrolase 17 family
4113.PGSC0003DMT400008245	Beta-1,3-glucanase 14; Beta-glucosidase 08; Belongs to the glycosyl hydrolase 17 family
4113.PGSC0003DMT400063348	Beta-1,3-glucanase 18; Glucan endo-1,3-beta-glucosidase 3
4113.PGSC0003DMT400003054	Beta-1,3-glucanase 29; Hydrolase, hydrolyzing O-glycosyl compounds
4113.PGSC0003DMT400063205	Uncharacterized protein; Aminoaldehyde dehydrogenase 2; Belongs to the aldehyde dehydrogenase family
4113.PGSC0003DMT400075652	B-box zinc finger protein 16; Salt-tolerance protein
4113.PGSC0003DMT400048964	Zinc finger protein
4113.PGSC0003DMT400069034	Endochitinase 4; Defense against chitin-containing fungal pathogens
4113.PGSC0003DMT400082113	Cytosolic cysteine synthase
4113.PGSC0003DMT400066557	Uncharacterized protein; D-type cyclin family 3 subgroup 2; Belongs to the cyclin family
4113.PGSC0003DMT400020648	Uncharacterized protein; D-type cyclin family 3 subgroup 3; Belongs to the cyclin family
4113.PGSC0003DMT400027291	Uncharacterized protein; Cytochrome P450
4113.PGSC0003DMT400047957	Erwinia induced protein 1
4113.PGSC0003DMT400001303	Formate dehydrogenase, mitochondrial; Catalyzes the NAD(+)-dependent oxidation of formate to carbon dioxide. Involved in the cell stress response. Involved in formate-dependent oxygen uptake coupled to ATP synthesis; Belongs to the D-isomer specific 2-hydroxyacid dehydrogenase family. FDH subfamily
4113.PGSC0003DMT400057147	Plastid-dividing ring protein
4113.PGSC0003DMT400006168	Uncharacterized protein; Gamma-tocopherol methyltransferase; Belongs to the class I-like SAM-binding methyltransferase superfamily. gTMT family
4113.PGSC0003DMT400044944	Glyceraldehyde 3-phosphate dehydrogenase; Belongs to the glyceraldehyde-3-phosphate dehydrogenase family
4113.PGSC0003DMT400048075	3-hydroxy-3-methylglutaryl-coenzyme A reductase 3; Catalyzes the synthesis of mevalonate. The specific precursor of all isoprenoid compounds present in plants
4113.PGSC0003DMT400006474	Hexokinase-1; Fructose and glucose phosphorylating enzyme. May be involved in the phosphorylation of glucose during the export from plastids to cytosol. Seems neither to be involved in cell sugar sensing nor in carbohydrate metabolism in tuber
4113.PGSC0003DMT400037696	Uncharacterized protein; Alpha-glucosidase; Belongs to the glycosyl hydrolase 31 family
4113.PGSC0003DMT400087679	S-adenosylmethionine synthase 2; Catalyzes the formation of S-adenosylmethionine from methionine and ATP. The reaction comprises two steps that are both catalyzed by the same enzyme: formation of S-adenosylmethionine (AdoMet) and triphosphate, and subsequent hydrolysis of the triphosphate
4113.PGSC0003DMT400012780	Major intrinsic protein 1; Belongs to the MIP/aquaporin (TC 1.A.8) family
4113.PGSC0003DMT400014637	Uncharacterized protein; MAPKK; Belongs to the protein kinase superfamily
4113.PGSC0003DMT400036284	Uncharacterized protein; MYB transcription factor
4113.PGSC0003DMT400015066	Neoxanthin synthase, chloroplastic; Involved in the synthesis of neoxanthin, the last product of carotenoid synthesis and a precursor of abscisic acid; Belongs to the lycopene cyclase family
4113.PGSC0003DMT400000156	Bifunctional L-3-cyanoalanine synthase/cysteine synthase 2, mitochondrial; Has very low cyanoalanine synthase and cysteine synthase activities
4113.PGSC0003DMT400030674	Steroid C-22 oxygenase; Cytochrome P-450; Belongs to the cytochrome P450 family
4113.PGSC0003DMT400000067	Uncharacterized protein; Conserved gene of unknown function; Belongs to the short-chain dehydrogenases/reductases (SDR) family
4113.PGSC0003DMT400000265	Uncharacterized protein; Atpob1
4113.PGSC0003DMT400000350	Uncharacterized protein; Conserved gene of unknown function
4113.PGSC0003DMT400000356	Uncharacterized protein; RAB11B
4113.PGSC0003DMT400000538	Uncharacterized protein; Polygalacturonase
4113.PGSC0003DMT400000933	Zinc finger CCCH domain-containing protein 20
4113.PGSC0003DMT400001149	Glycosyltransferase; Glucosyltransferase; Belongs to the UDP-glycosyltransferase family
4113.PGSC0003DMT400002150	ATP binding protein
4113.PGSC0003DMT400002261	Mitochondrial outer membrane protein porin of 36 kDa; Forms a channel through the cell membrane that allows diffusion of small hydrophilic molecules. The channel adopts an open conformation at low or zero membrane potential and a closed conformation at potentials above 30-40 mV. The open state has a weak anion selectivity whereas the closed state is cation- selective (By similarity)
4113.PGSC0003DMT400002293	Uncharacterized protein; White-brown-complex ABC transporter family
4113.PGSC0003DMT400002382	Penicillin-binding protein
4113.PGSC0003DMT400003586	DNA-binding protein
4113.PGSC0003DMT400003958	Uncharacterized protein; Transporter
4113.PGSC0003DMT400004240	Uncharacterized protein; Ferredoxin
4113.PGSC0003DMT400004317	Uncharacterized protein; Conserved gene of unknown function
4113.PGSC0003DMT400004371	Uncharacterized protein; Conserved gene of unknown function
4113.PGSC0003DMT400004442	Uncharacterized protein; Lectin receptor kinase
4113.PGSC0003DMT400004836	Translin family protein
4113.PGSC0003DMT400005153	Aminotransferase family protein
4113.PGSC0003DMT400005466	Uncharacterized protein; Conserved gene of unknown function
4113.PGSC0003DMT400005897	Uncharacterized protein; Hydrolase
4113.PGSC0003DMT400006326	Uncharacterized protein; Glutamate decarboxylase 4a
4113.PGSC0003DMT400006851	DNA binding protein
4113.PGSC0003DMT400006854	Uncharacterized protein; FtsZ; Belongs to the tubulin family
4113.PGSC0003DMT400006944	Uncharacterized protein; Receptor kinase
4113.PGSC0003DMT400006945	Pyruvate kinase; Belongs to the pyruvate kinase family
4113.PGSC0003DMT400006972	F-box family protein
4113.PGSC0003DMT400007060	Uncharacterized protein; Homeodomain
4113.PGSC0003DMT400007177	Uncharacterized protein; Calreticulin
4113.PGSC0003DMT400007294	Uncharacterized protein; DNA helicase hus2
4113.PGSC0003DMT400007421	Uncharacterized protein; Ribonuclease t2; Belongs to the RNase T2 family
4113.PGSC0003DMT400007766	Serine-threonine protein kinase, plant-type
4113.PGSC0003DMT400007784	Uncharacterized protein; Kinesin
4113.PGSC0003DMT400007975	Uncharacterized protein; COR414-TM1
4113.PGSC0003DMT400008352	Uncharacterized protein; AtGRF7
4113.PGSC0003DMT400008510	Protein regulator of cytokinesis
4113.PGSC0003DMT400008621	F-box and wd40 domain protein
4113.PGSC0003DMT400008772	Uncharacterized protein; Kinesin
4113.PGSC0003DMT400009061	Uncharacterized protein; AAA-type ATPase; Belongs to the AAA ATPase family
4113.PGSC0003DMT400009091	Folate carrier protein; Belongs to the mitochondrial carrier (TC 2.A.29) family
4113.PGSC0003DMT400009133	Uncharacterized protein; Receptor kinase; Belongs to the protein kinase superfamily. Ser/Thr protein kinase family
4113.PGSC0003DMT400009212	MLO-like protein; May be involved in modulation of pathogen defense and leaf cell death
4113.PGSC0003DMT400009224	Uncharacterized protein; Conserved gene of unknown function
4113.PGSC0003DMT400009319	Uncharacterized protein; Conserved gene of unknown function
4113.PGSC0003DMT400009520	Leucine-rich repeat receptor protein kinase EXS
4113.PGSC0003DMT400009869	Pectate lyase
4113.PGSC0003DMT400010014	Amino acid binding protein
4113.PGSC0003DMT400010271	Uncharacterized protein; Conserved gene of unknown function
4113.PGSC0003DMT400010432	Uncharacterized protein; Conserved gene of unknown function
4113.PGSC0003DMT400010941	Uncharacterized protein; Chromomethylase
4113.PGSC0003DMT400011524	Uncharacterized protein; Inosine-uridine preferring nucleoside hydrolase
4113.PGSC0003DMT400011592	Uncharacterized protein; UDP-glucosyltransferase
4113.PGSC0003DMT400011907	Uncharacterized protein; Cyclopropyl isomerase
4113.PGSC0003DMT400011910	Hydroxyproline-rich glycoprotein (HRGP)
4113.PGSC0003DMT400012014	Peptidyl-prolyl cis-trans isomerase; Parvulin-type peptidyl prolyl cis/trans isomerase
4113.PGSC0003DMT400012073	Uncharacterized protein; Conserved gene of unknown function
4113.PGSC0003DMT400012508	Polyadenylate-binding protein
4113.PGSC0003DMT400012540	Uncharacterized protein; Transcription factor R18
4113.PGSC0003DMT400012863	Uncharacterized protein; Transferase, transferring glycosyl groups
4113.PGSC0003DMT400013037	Uncharacterized protein; Beta-glucosidase; Belongs to the glycosyl hydrolase 1 family
4113.PGSC0003DMT400013447	Uncharacterized protein; Superoxide dismutase
4113.PGSC0003DMT400013473	Uncharacterized protein; ATP synthase subunit delta', mitochondrial
4113.PGSC0003DMT400014419	ArcA2 protein
4113.PGSC0003DMT400014431	Protein DETOXIFICATION; Conserved gene of unknown function; Belongs to the multi antimicrobial extrusion (MATE) (TC 2.A.66.1) family
4113.PGSC0003DMT400014704	Uncharacterized protein; Exonuclease
4113.PGSC0003DMT400014843	Zn finger protein
4113.PGSC0003DMT400015009	Uncharacterized protein; S-adenosylmethionine-dependent methyltransferase
4113.PGSC0003DMT400015233	Uncharacterized protein; Hydrolase, hydrolyzing O-glycosyl compounds
4113.PGSC0003DMT400015281	Glycosyltransferase; Glucosyltransferase; Belongs to the UDP-glycosyltransferase family
4113.PGSC0003DMT400015439	Uncharacterized protein; Leucine-rich repeat/extensin
4113.PGSC0003DMT400015718	BRCA1 C Terminus domain containing protein
4113.PGSC0003DMT400015838	Minichromosome maintenance protein 10 isoform 1
4113.PGSC0003DMT400016288	Fimbriae-associated protein Fap1
4113.PGSC0003DMT400016488	Uncharacterized protein; Aldo/keto reductase
4113.PGSC0003DMT400016755	Rhomboid-like protein; KOM
4113.PGSC0003DMT400016842	Uncharacterized protein; Conserved gene of unknown function
4113.PGSC0003DMT400016858	Uncharacterized protein; Conserved gene of unknown function
4113.PGSC0003DMT400017112	Uncharacterized protein; Aspartate aminotransferase
4113.PGSC0003DMT400017340	F-box and wd40 domain protein
4113.PGSC0003DMT400017691	Uncharacterized protein; Polygalacturonase
4113.PGSC0003DMT400017783	Uncharacterized protein; Glycosyltransferase UGT90A7
4113.PGSC0003DMT400018217	Uncharacterized protein; Peptide N-glycanase
4113.PGSC0003DMT400018574	Uncharacterized protein; BZIP transcription factor
4113.PGSC0003DMT400018710	Uncharacterized protein; Exonuclease 1
4113.PGSC0003DMT400018746	Uncharacterized protein; Cyclopropane fatty acid synthase
4113.PGSC0003DMT400019129	Fatty acyl-CoA reductase; Catalyzes the reduction of fatty acyl-CoA to fatty alcohols
4113.PGSC0003DMT400019864	Serine-threonine protein kinase, plant-type
4113.PGSC0003DMT400020076	Protein transport Sec1a; Belongs to the STXBP/unc-18/SEC1 family
4113.PGSC0003DMT400020096	Uncharacterized protein; Cationic amino acid transporter
4113.PGSC0003DMT400020180	Uncharacterized protein; Anthocyanin acyltransferase
4113.PGSC0003DMT400020286	Uncharacterized protein; Glutathione S-transferase
4113.PGSC0003DMT400020322	Uncharacterized protein; Conserved gene of unknown function
4113.PGSC0003DMT400020408	Uncharacterized protein; Conserved gene of unknown function
4113.PGSC0003DMT400020425	Uncharacterized protein; Temperature-induced lipocalin
4113.PGSC0003DMT400020466	Uncharacterized protein; UDP-glucosyltransferase
4113.PGSC0003DMT400020662	Uncharacterized protein; WOX4
4113.PGSC0003DMT400020786	Uncharacterized protein; Electron transporter
4113.PGSC0003DMT400020945	Nucleic acid binding protein
4113.PGSC0003DMT400020968	Elongation factor 1-alpha; This protein promotes the GTP-dependent binding of aminoacyl-tRNA to the A-site of ribosomes during protein biosynthesis
4113.PGSC0003DMT400021444	Uncharacterized protein; Starch synthase IV
4113.PGSC0003DMT400021498	Uncharacterized protein; MYB21
4113.PGSC0003DMT400021703	Uncharacterized protein; Endo-1,4-beta-xylanase A
4113.PGSC0003DMT400021762	Transmembrane 9 superfamily member; Transmembrane transporter; Belongs to the nonaspanin (TM9SF) (TC 9.A.2) family
4113.PGSC0003DMT400021824	Uncharacterized protein; W-3 desaturase
4113.PGSC0003DMT400021867	Uncharacterized protein; Major latex
4113.PGSC0003DMT400021970	Uncharacterized protein; Inactive purple acid phosphatase 28
4113.PGSC0003DMT400022011	Uncharacterized protein; Carbonyl reductase
4113.PGSC0003DMT400022423	Uncharacterized protein; Troponin C, skeletal muscle
4113.PGSC0003DMT400022614	RNA-binding protein
4113.PGSC0003DMT400022920	DNA binding protein
4113.PGSC0003DMT400022940	Uncharacterized protein; Uracil phosphoribosyltransferase
4113.PGSC0003DMT400023368	Uncharacterized protein; WRKY transcription factor 4
4113.PGSC0003DMT400023418	ATP binding protein
4113.PGSC0003DMT400024193	Mads box protein
4113.PGSC0003DMT400024240	Uncharacterized protein; Chromosome-associated kinesin KIF4A; Belongs to the TRAFAC class myosin-kinesin ATPase superfamily. Kinesin family
4113.PGSC0003DMT400024438	Uncharacterized protein; Transcription factor
4113.PGSC0003DMT400024478	Aspartic proteinase nepenthesin-1; Belongs to the peptidase A1 family
4113.PGSC0003DMT400024518	Cellulose synthase; Belongs to the glycosyltransferase 2 family. Plant cellulose synthase subfamily
4113.PGSC0003DMT400024676	DNA binding protein
4113.PGSC0003DMT400025000	Uncharacterized protein; Conserved gene of unknown function
4113.PGSC0003DMT400025150	Uncharacterized protein; 1-aminocyclopropane-1-carboxylate oxidase; Belongs to the iron/ascorbate-dependent oxidoreductase family
4113.PGSC0003DMT400025571	Zinc finger protein; Belongs to the 'GDSL' lipolytic enzyme family
4113.PGSC0003DMT400025590	Phospholipase D; Hydrolyzes glycerol-phospholipids at the terminal phosphodiesteric bond
4113.PGSC0003DMT400025646	Uncharacterized protein; Conserved gene of unknown function
4113.PGSC0003DMT400025719	Uncharacterized protein; Conserved gene of unknown function
4113.PGSC0003DMT400025846	Uncharacterized protein; 1,4-alpha-glucan branching enzyme
4113.PGSC0003DMT400025919	Pyrophosphate--fructose 6-phosphate 1-phosphotransferase subunit alpha; Regulatory subunit of pyrophosphate--fructose 6- phosphate 1-phosphotransferase
4113.PGSC0003DMT400026585	Uncharacterized protein; Cytochrome P450
4113.PGSC0003DMT400026850	Cathepsin B-like cysteine proteinase; Belongs to the peptidase C1 family
4113.PGSC0003DMT400027661	Serine/threonine-protein kinase cdk9
4113.PGSC0003DMT400028074	Uncharacterized protein; Conserved gene of unknown function
4113.PGSC0003DMT400028769	Glycosyltransferase; UDP-glucuronosyltransferase; Belongs to the UDP-glycosyltransferase family
4113.PGSC0003DMT400029287	P21-rho-binding domain-containing protein
4113.PGSC0003DMT400029468	Uncharacterized protein; Conserved gene of unknown function
4113.PGSC0003DMT400029480	Nucleotide binding protein
4113.PGSC0003DMT400029743	Uncharacterized protein; TGA10 transcription factor
4113.PGSC0003DMT400030203	Uncharacterized protein; RCG54054
4113.PGSC0003DMT400030417	ATP synthase subunit O, mitochondrial; Mitochondrial membrane ATP synthase (F(1)F(0) ATP synthase or Complex V) produces ATP from ADP in the presence of a proton gradient across the membrane which is generated by electron transport complexes of the respiratory chain. F-type ATPases consist of two structural domains, F(1) - containing the extramembraneous catalytic core and F(0) - containing the m…
4113.PGSC0003DMT400030923	Uncharacterized protein; Chitinase; Belongs to the glycosyl hydrolase 18 family
4113.PGSC0003DMT400031195	Cationic peroxidase 1; Belongs to the peroxidase family. Classical plant (class III) peroxidase subfamily
4113.PGSC0003DMT400031201	Non-specific lipid-transfer protein; Plant non-specific lipid-transfer proteins transfer phospholipids as well as galactolipids across membranes. May play a role in wax or cutin deposition in the cell walls of expanding epidermal cells and certain secretory tissues
4113.PGSC0003DMT400031316	Uncharacterized protein; White-brown-complex ABC transporter family
4113.PGSC0003DMT400031525	Uncharacterized protein; Type I serine protease inhibitor
4113.PGSC0003DMT400031542	Uncharacterized protein; Major latex
4113.PGSC0003DMT400031584	Uncharacterized protein; Gene of unknown function
4113.PGSC0003DMT400031776	Uncharacterized protein; Transferase, transferring glycosyl groups
4113.PGSC0003DMT400031815	Uncharacterized protein; Kinesin heavy chain; Belongs to the TRAFAC class myosin-kinesin ATPase superfamily. Kinesin family
4113.PGSC0003DMT400031889	Uncharacterized protein; Electron transporter
4113.PGSC0003DMT400032030	Uncharacterized protein; DNA primase
4113.PGSC0003DMT400032107	Uncharacterized protein; Conserved gene of unknown function
4113.PGSC0003DMT400032266	Malate dehydrogenase
4113.PGSC0003DMT400032381	Uncharacterized protein; Transcription factor RF2a
4113.PGSC0003DMT400032926	Uncharacterized protein; Conserved gene of unknown function
4113.PGSC0003DMT400033053	Uncharacterized protein; Zeatin O-xylosyltransferase
4113.PGSC0003DMT400033151	Uncharacterized protein; Conserved gene of unknown function
4113.PGSC0003DMT400033221	LOB domain-containing protein
4113.PGSC0003DMT400033449	Uncharacterized protein; Alpha-rhamnosidase
4113.PGSC0003DMT400033482	Uncharacterized protein; Elicitor inducible beta-1,3-glucanase NtEIG-E76; Belongs to the glycosyl hydrolase 17 family
4113.PGSC0003DMT400033753	Homologous-pairing protein 2 homolog
4113.PGSC0003DMT400034489	Uncharacterized protein; ERF transcription factor 5
4113.PGSC0003DMT400034519	Serine/threonine-protein kinase HT1
4113.PGSC0003DMT400034623	Uncharacterized protein; DNA binding / nucleic acid binding
4113.PGSC0003DMT400034628	Uncharacterized protein; EMB2656 (EMBRYO DEFECTIVE 2656); binding
4113.PGSC0003DMT400034711	Uncharacterized protein; Ubiquitin thiolesterase
4113.PGSC0003DMT400034809	Uncharacterized protein; Adenylate kinase family; Belongs to the adenylate kinase family
4113.PGSC0003DMT400034983	SNF2 domain-containing protein
4113.PGSC0003DMT400035158	ADP-ribosylation factor 1; GTP-binding protein involved in protein trafficking; may modulate vesicle budding and uncoating within the Golgi apparatus
4113.PGSC0003DMT400035280	Dirigent protein; Dirigent proteins impart stereoselectivity on the phenoxy radical-coupling reaction, yielding optically active lignans from two molecules of coniferyl alcohol in the biosynthesis of lignans, flavonolignans, and alkaloids and thus plays a central role in plant secondary metabolism
4113.PGSC0003DMT400035319	Microtubule-associated protein TORTIFOLIA1
4113.PGSC0003DMT400035458	Ubiquitin-protein ligase
4113.PGSC0003DMT400035753	Uncharacterized protein; Early nodulin 20
4113.PGSC0003DMT400035869	Trehalose 6-phosphate phosphatase; Removes the phosphate from trehalose 6-phosphate to produce free trehalose
4113.PGSC0003DMT400036226	Calcium lipid binding protein
4113.PGSC0003DMT400036374	Uncharacterized protein; Anthocyanin acyltransferase
4113.PGSC0003DMT400036388	Protein disulfide isomerase
4113.PGSC0003DMT400036695	Uncharacterized protein; Hydroxycinnamoyl transferase
4113.PGSC0003DMT400036974	Serine carboxypeptidase; Belongs to the peptidase S10 family
4113.PGSC0003DMT400037438	Uncharacterized protein; LeOPT1
4113.PGSC0003DMT400037582	Uncharacterized protein; Aldehyde dehydrogenase (NAD+); Belongs to the aldehyde dehydrogenase family
4113.PGSC0003DMT400037607	Uncharacterized protein; Conserved gene of unknown function
4113.PGSC0003DMT400037877	Uncharacterized protein; ERF transcription factor 5
4113.PGSC0003DMT400038414	Uncharacterized protein; Glycerol-3-phosphate transporter
4113.PGSC0003DMT400038500	Uncharacterized protein; Subtilisin-like protease
4113.PGSC0003DMT400038532	Uncharacterized protein; Conserved gene of unknown function
4113.PGSC0003DMT400038616	Uncharacterized protein; Leucine-rich repeat receptor kinase; Belongs to the protein kinase superfamily. Ser/Thr protein kinase family
4113.PGSC0003DMT400039054	Uncharacterized protein; 9-cis-epoxy-carotenoid dioxygenase 2
4113.PGSC0003DMT400039339	Uncharacterized protein; Conserved gene of unknown function
4113.PGSC0003DMT400039396	Ubiquitin-protein ligase
4113.PGSC0003DMT400039497	40S ribosomal protein SA; Required for the assembly and/or stability of the 40S ribosomal subunit. Required for the processing of the 20S rRNA- precursor to mature 18S rRNA in a late step of the maturation of 40S ribosomal subunits
4113.PGSC0003DMT400039755	Uncharacterized protein; CT099
4113.PGSC0003DMT400040275	Uncharacterized protein; Nitrate transporter
4113.PGSC0003DMT400040488	Uncharacterized protein; Lyase
4113.PGSC0003DMT400040835	Uncharacterized protein; ATP binding / microtubule motor; Belongs to the TRAFAC class myosin-kinesin ATPase superfamily. Kinesin family
4113.PGSC0003DMT400041081	Ethylene-overproduction protein 1
4113.PGSC0003DMT400041573	Uncharacterized protein; Sinapyl alcohol dehydrogenase 2
4113.PGSC0003DMT400041585	TRNA/rRNA methyltransferase family protein
4113.PGSC0003DMT400041615	Centromere protein
4113.PGSC0003DMT400041874	Stearoyl-[acyl-carrier-protein] 9-desaturase, chloroplastic; Converts stearoyl-ACP to oleoyl-ACP by introduction of a cis double bond between carbons 9 and 10 of the acyl chain; Belongs to the fatty acid desaturase type 2 family
4113.PGSC0003DMT400041953	Protein kinase
4113.PGSC0003DMT400042507	Uncharacterized protein; Binding / calmodulin binding
4113.PGSC0003DMT400043030	Uncharacterized protein; NADH dehydrogenase
4113.PGSC0003DMT400043152	Uncharacterized protein; Short chain alcohol dehydrogenase; Belongs to the short-chain dehydrogenases/reductases (SDR) family
4113.PGSC0003DMT400043219	Glycosyltransferase; Zeatin O-glucosyltransferase; Belongs to the UDP-glycosyltransferase family
4113.PGSC0003DMT400043508	Uncharacterized protein; Inositol polyphosphate 5-phosphatase
4113.PGSC0003DMT400043567	Uncharacterized protein; Phytol kinase
4113.PGSC0003DMT400043856	Uncharacterized protein; Subtilisin-like serine protease
4113.PGSC0003DMT400044544	Integrin-linked protein kinase
4113.PGSC0003DMT400045106	Uncharacterized protein; Plant ubiquilin
4113.PGSC0003DMT400045203	Uncharacterized protein; ESC
4113.PGSC0003DMT400045317	Uncharacterized protein; Conserved gene of unknown function
4113.PGSC0003DMT400045450	Thioredoxin H; Belongs to the thioredoxin family
4113.PGSC0003DMT400045699	Uncharacterized protein; APUM7 (Arabidopsis Pumilio 7); RNA binding / binding
4113.PGSC0003DMT400045859	Uncharacterized protein; Sugar transporter
4113.PGSC0003DMT400045914	Uncharacterized protein; Conserved gene of unknown function
4113.PGSC0003DMT400045961	Uncharacterized protein; Kinesin
4113.PGSC0003DMT400046075	Uncharacterized protein; Signal recognition particle GTPase, FtsY
4113.PGSC0003DMT400046124	Uncharacterized protein; Conserved gene of unknown function
4113.PGSC0003DMT400046152	RAS protein activator like 1
4113.PGSC0003DMT400046218	Uncharacterized protein; Nodulation receptor kinase; Belongs to the protein kinase superfamily
4113.PGSC0003DMT400046429	Uncharacterized protein; Multidrug resistance pump
4113.PGSC0003DMT400046609	Uncharacterized protein; Conserved gene of unknown function
4113.PGSC0003DMT400047135	Serine/threonine-protein kinase Haspin
4113.PGSC0003DMT400047262	Uncharacterized protein; Riboflavin synthase alpha chain
4113.PGSC0003DMT400047266	Uncharacterized protein; Conserved gene of unknown function
4113.PGSC0003DMT400047460	Glycosyltransferase; UDP-glucuronosyltransferase; Belongs to the UDP-glycosyltransferase family
4113.PGSC0003DMT400047656	SET domain protein
4113.PGSC0003DMT400047686	Ubiquitin fusion protein
4113.PGSC0003DMT400047825	Uncharacterized protein; Myb
4113.PGSC0003DMT400047907	Tospovirus resistance protein B; Belongs to the disease resistance NB-LRR family
4113.PGSC0003DMT400048610	Uncharacterized protein; With no lysine kinase
4113.PGSC0003DMT400048684	Uncharacterized protein; Polyphenol oxidase
4113.PGSC0003DMT400048685	Uncharacterized protein; Polyphenol oxidase A, chloroplastic
4113.PGSC0003DMT400049315	ATP binding protein
4113.PGSC0003DMT400049420	Uncharacterized protein; GRAS family transcription factor; Belongs to the GRAS family
4113.PGSC0003DMT400049571	Pectinesterase; Acts in the modification of cell walls via demethylesterification of cell wall pectin
4113.PGSC0003DMT400049606	Uncharacterized protein; Conserved gene of unknown function
4113.PGSC0003DMT400050559	RING-type E3 ubiquitin transferase; U-box domain-containing protein 42
4113.PGSC0003DMT400050741	Uncharacterized protein; Essential meiotic endonuclease 1B
4113.PGSC0003DMT400050989	Uncharacterized protein; Conserved gene of unknown function
4113.PGSC0003DMT400051165	Uncharacterized protein; Hydrolase
4113.PGSC0003DMT400051375	Uncharacterized protein; Glutathione s-transferase
4113.PGSC0003DMT400051665	Uncharacterized protein; S-adenosylmethionine-dependent methyltransferase
4113.PGSC0003DMT400052263	Uncharacterized protein; Conserved gene of unknown function
4113.PGSC0003DMT400052390	Uncharacterized protein; Conserved gene of unknown function
4113.PGSC0003DMT400052826	DNA binding protein
4113.PGSC0003DMT400052833	F-box family protein
4113.PGSC0003DMT400053149	Elicitor-inducible protein EIG-J7
4113.PGSC0003DMT400053208	Uncharacterized protein; Conserved gene of unknown function
4113.PGSC0003DMT400053345	Uncharacterized protein; Isoamylase isoform 1
4113.PGSC0003DMT400053563	Ribosomal protein S1
4113.PGSC0003DMT400053618	Peroxidase 2; Belongs to the peroxidase family. Classical plant (class III) peroxidase subfamily
4113.PGSC0003DMT400054457	Uncharacterized protein; Cytochrome P450
4113.PGSC0003DMT400054558	Protein phosphatases pp1 regulatory subunit
4113.PGSC0003DMT400054594	LRR receptor-like serine/threonine-protein kinase
4113.PGSC0003DMT400054617	Vacuolar protein sorting-associated protein 2 homolog 2; Belongs to the SNF7 family
4113.PGSC0003DMT400055038	Serine/threonine-protein kinase PBS1; Belongs to the protein kinase superfamily. Ser/Thr protein kinase family
4113.PGSC0003DMT400055243	Adenylyl-sulfate kinase; Catalyzes the synthesis of activated sulfate
4113.PGSC0003DMT400055490	Uncharacterized protein; Adenosine kinase isoform 1T
4113.PGSC0003DMT400055567	Uncharacterized protein; 7-keto-8-amino pelargonic acid synthase
4113.PGSC0003DMT400056164	Uncharacterized protein; Conserved gene of unknown function
4113.PGSC0003DMT400056288	Uncharacterized protein; Conserved gene of unknown function
4113.PGSC0003DMT400056393	FH protein NFH2; Belongs to the formin-like family
4113.PGSC0003DMT400056852	Uncharacterized protein; Ent-kaurene synthase B, chloroplast
4113.PGSC0003DMT400056871	Phosphoglycerate kinase; Belongs to the phosphoglycerate kinase family
4113.PGSC0003DMT400056911	Uncharacterized protein; Conserved gene of unknown function
4113.PGSC0003DMT400057597	Beta-galactosidase
4113.PGSC0003DMT400058132	Uncharacterized protein; Receptor kinase; Belongs to the protein kinase superfamily. Ser/Thr protein kinase family
4113.PGSC0003DMT400058213	ATP binding / protein binding / transmembrane receptor; Belongs to the disease resistance NB-LRR family
4113.PGSC0003DMT400058674	Uncharacterized protein; Cytochrome
4113.PGSC0003DMT400058751	Uncharacterized protein; Ethylene response factor 3
4113.PGSC0003DMT400058822	Uncharacterized protein; Conserved gene of unknown function
4113.PGSC0003DMT400058989	Uncharacterized protein; Erect panical 2
4113.PGSC0003DMT400059563	Uncharacterized protein; Conserved gene of unknown function
4113.PGSC0003DMT400059571	Uncharacterized protein; Cysteine-rich polycomb
4113.PGSC0003DMT400059610	Protein phosphatase 2c
4113.PGSC0003DMT400059697	Retrotransposon protein, Ty3-gypsy subclass
4113.PGSC0003DMT400059741	Uncharacterized protein; 2-isopropylmalate synthase A; Belongs to the alpha-IPM synthase/homocitrate synthase family
4113.PGSC0003DMT400060250	Uncharacterized protein; Epoxide hydrolase
4113.PGSC0003DMT400060438	Uncharacterized protein; ATP-binding cassette transporter
4113.PGSC0003DMT400060833	Adenylyl-sulfate kinase; Catalyzes the synthesis of activated sulfate
4113.PGSC0003DMT400061155	Uncharacterized protein; Embryo-specific 3
4113.PGSC0003DMT400061265	Uncharacterized protein; Microsomal omega-6-desaturase
4113.PGSC0003DMT400061374	60S ribosomal protein L27
4113.PGSC0003DMT400061630	Uncharacterized protein; Conserved gene of unknown function
4113.PGSC0003DMT400062152	Uncharacterized protein; Conserved gene of unknown function
4113.PGSC0003DMT400062652	Uncharacterized protein; Gene of unknown function
4113.PGSC0003DMT400062862	F-box and wd40 domain protein
4113.PGSC0003DMT400063207	Uncharacterized protein; Alpha-n-acetylglucosaminidase
4113.PGSC0003DMT400063222	Protein PRD1
4113.PGSC0003DMT400063239	Zinc finger protein
4113.PGSC0003DMT400063245	Uncharacterized protein; Polygalacturonase-1 non-catalytic subunit beta
4113.PGSC0003DMT400063351	Uncharacterized protein; Flavonoid 3'-monooxygenase; Belongs to the cytochrome P450 family
4113.PGSC0003DMT400063477	Lipoxygenase; Plant lipoxygenase may be involved in a number of diverse aspects of plant physiology including growth and development, pest resistance, and senescence or responses to wounding
4113.PGSC0003DMT400063591	Uncharacterized protein; MCT-1 like PUA RNA binding-domain containing protein
4113.PGSC0003DMT400063740	Uncharacterized protein; Conserved gene of unknown function
4113.PGSC0003DMT400064005	Zinc finger family protein
4113.PGSC0003DMT400064115	Uncharacterized protein; Conserved gene of unknown function
4113.PGSC0003DMT400064477	Uncharacterized protein; Conserved gene of unknown function
4113.PGSC0003DMT400064555	Peroxidase 4
4113.PGSC0003DMT400064691	Uncharacterized protein; Pho1
4113.PGSC0003DMT400064785	Uncharacterized protein; 1-acyl-sn-glycerol-3-phosphate acyltransferase
4113.PGSC0003DMT400065176	Uncharacterized protein; Short chain alcohol dehydrogenase
4113.PGSC0003DMT400065303	POT family protein
4113.PGSC0003DMT400065470	Serine/threonine-protein kinase; Belongs to the protein kinase superfamily
4113.PGSC0003DMT400066225	Uncharacterized protein; Interleukin-1 receptor-associated kinase
4113.PGSC0003DMT400066384	Uncharacterized protein; CXE carboxylesterase
4113.PGSC0003DMT400066572	Glycosyltransferase; UDP-glucose:glucosyltransferase; Belongs to the UDP-glycosyltransferase family
4113.PGSC0003DMT400066657	ATP binding protein
4113.PGSC0003DMT400066664	Uncharacterized protein; Methylketone synthase Ib
4113.PGSC0003DMT400066768	Uncharacterized protein; Conserved gene of unknown function
4113.PGSC0003DMT400067103	Flavin monooxygenase
4113.PGSC0003DMT400067117	Uncharacterized protein; Cyclin A2; Belongs to the cyclin family
4113.PGSC0003DMT400067540	Homeobox-leucine zipper protein
4113.PGSC0003DMT400067652	3-oxoacyl-(Acyl-carrier-protein) synthase III
4113.PGSC0003DMT400067836	Uncharacterized protein; Conserved gene of unknown function
4113.PGSC0003DMT400067992	Uncharacterized protein; Conserved gene of unknown function
4113.PGSC0003DMT400068040	Uncharacterized protein; AP2/ERF domain-containing transcription factor
4113.PGSC0003DMT400068120	DNA-binding protein smubp-2
4113.PGSC0003DMT400068339	Uncharacterized protein; Myosin heavy chain
4113.PGSC0003DMT400068481	Uncharacterized protein; R2r3-myb transcription factor
4113.PGSC0003DMT400069113	Uncharacterized protein; Cytochrome P450 monooxygenase
4113.PGSC0003DMT400069231	Uncharacterized protein; UDP-glucosyltransferase; Belongs to the UDP-glycosyltransferase family
4113.PGSC0003DMT400069454	Uncharacterized protein; Hyoscyamine 6-dioxygenase
4113.PGSC0003DMT400069500	Uncharacterized protein; Polygalacturonase-1 non-catalytic subunit beta
4113.PGSC0003DMT400069580	Kinase interacting protein
4113.PGSC0003DMT400069936	Serine/threonine-protein kinase Nek8
4113.PGSC0003DMT400070107	Uncharacterized protein; Kinesin heavy chain; Belongs to the TRAFAC class myosin-kinesin ATPase superfamily. Kinesin family
4113.PGSC0003DMT400070125	Glycosyltransferase; Glucosyltransferase; Belongs to the UDP-glycosyltransferase family
4113.PGSC0003DMT400070431	Microtubule-associated protein
4113.PGSC0003DMT400070447	Uncharacterized protein; Elongation factor 1B alpha-subunit; Belongs to the EF-1-beta/EF-1-delta family
4113.PGSC0003DMT400070545	F-box/kelch-repeat protein
4113.PGSC0003DMT400070587	Ring finger protein
4113.PGSC0003DMT400071037	Heme-binding protein
4113.PGSC0003DMT400071099	Uncharacterized protein; Interactor of constitutive active ROPs 1
4113.PGSC0003DMT400071138	Uncharacterized protein; Conserved gene of unknown function
4113.PGSC0003DMT400071330	Uncharacterized protein; Triosephosphate isomerase
4113.PGSC0003DMT400071725	60S ribosomal protein L1
4113.PGSC0003DMT400072292	Calcium-dependent protein kinase
4113.PGSC0003DMT400072411	Pyruvate kinase; Belongs to the pyruvate kinase family
4113.PGSC0003DMT400072760	Ninja-family protein AFP2
4113.PGSC0003DMT400072882	Uncharacterized protein; Conserved gene of unknown function
4113.PGSC0003DMT400073060	Uncharacterized protein; Conserved gene of unknown function
4113.PGSC0003DMT400073440	Uncharacterized protein; Eukaryotic translation initiation factor 3 subunit
4113.PGSC0003DMT400073540	Uncharacterized protein; Conserved gene of unknown function
4113.PGSC0003DMT400073803	Uncharacterized protein; Pectinesterase-2
4113.PGSC0003DMT400073806	Uncharacterized protein; Pectinesterase-2
4113.PGSC0003DMT400074356	ATP binding protein
4113.PGSC0003DMT400074397	Uncharacterized protein; AP2 domain-containing transcription factor
4113.PGSC0003DMT400074652	Nucleic acid binding protein
4113.PGSC0003DMT400074667	Dual specificity protein kinase-ttk
4113.PGSC0003DMT400074715	Uncharacterized protein; Conserved gene of unknown function
4113.PGSC0003DMT400074931	Uncharacterized protein; Conserved gene of unknown function
4113.PGSC0003DMT400075209	Uncharacterized protein; Anthocyanin acyltransferase
4113.PGSC0003DMT400075236	Uncharacterized protein; Anthocyanin acyltransferase
4113.PGSC0003DMT400075635	Uncharacterized protein; Tetracycline transporter
4113.PGSC0003DMT400075780	Zinc ion binding protein
4113.PGSC0003DMT400075873	Uncharacterized protein; Purple acid phosphatase 1
4113.PGSC0003DMT400076251	Pectase lyase
4113.PGSC0003DMT400076270	Protein ABC1, mitochondrial
4113.PGSC0003DMT400076614	Coated vesicle membrane protein
4113.PGSC0003DMT400076830	Uncharacterized protein; Mechanosensitive ion channel domain-containing protein
4113.PGSC0003DMT400076933	Uncharacterized protein; Conserved gene of unknown function
4113.PGSC0003DMT400077142	Uncharacterized protein; Major ampullate spidroin 2-2
4113.PGSC0003DMT400077785	Uncharacterized protein; Cytochrome-c oxidase; Belongs to the cytochrome c oxidase subunit 6A family
4113.PGSC0003DMT400078205	Anionic peroxidase swpa7; Belongs to the peroxidase family. Classical plant (class III) peroxidase subfamily
4113.PGSC0003DMT400078286	Uncharacterized protein; GRAS4; Belongs to the GRAS family
4113.PGSC0003DMT400078371	TRANSPARENT TESTA 12 protein; Belongs to the multi antimicrobial extrusion (MATE) (TC 2.A.66.1) family
4113.PGSC0003DMT400078557	Uncharacterized protein; Receptor kinase
4113.PGSC0003DMT400078716	Uncharacterized protein; MATE transporter
4113.PGSC0003DMT400079464	DNA (cytosine-5)-methyltransferase; Cytosine-specific methyltransferase; Belongs to the class I-like SAM-binding methyltransferase superfamily. C5-methyltransferase family
4113.PGSC0003DMT400079639	Uncharacterized protein; Xyloglucan galactosyltransferase KATAMARI1
4113.PGSC0003DMT400080167	Uncharacterized protein; RAB7A
4113.PGSC0003DMT400080509	Uncharacterized protein; Pectin methylesterase 2
4113.PGSC0003DMT400081769	Histone H3.2
4113.PGSC0003DMT400081830	Uncharacterized protein; NL0E
4113.PGSC0003DMT400081837	Uncharacterized protein; Glucan endo-1,3-beta-glucosidase 4; Belongs to the glycosyl hydrolase 17 family
4113.PGSC0003DMT400082809	ATP binding / protein kinase/ protein serine/threonine kinase
4113.PGSC0003DMT400083811	Uncharacterized mitochondrial protein
4113.PGSC0003DMT400083900	ATP binding protein
4113.PGSC0003DMT400083968	40S ribosomal protein S3a; Cyc07; Belongs to the eukaryotic ribosomal protein eS1 family
4113.PGSC0003DMT400085799	Glycosyltransferase; Glucosyltransferase; Belongs to the UDP-glycosyltransferase family
4113.PGSC0003DMT400086427	Uncharacterized protein; Conserved gene of unknown function
4113.PGSC0003DMT400088876	Conserved hypothetical proline rich protein
4113.PGSC0003DMT400090495	Uncharacterized protein; Receptor kinase THESEUS 1
4113.PGSC0003DMT400090850	Ubiquitin-protein ligase
4113.PGSC0003DMT400091743	Uncharacterized protein; Gene of unknown function
4113.PGSC0003DMT400093358	Uncharacterized protein; Wax synthase
4113.PGSC0003DMT400093623	Uncharacterized protein; Conserved gene of unknown function
4113.PGSC0003DMT400094021	Uncharacterized protein; Basic 7S globulin 2 small subunit; Belongs to the peptidase A1 family
4113.PGSC0003DMT400095923	Uncharacterized protein; O-methyltransferase; Belongs to the class I-like SAM-binding methyltransferase superfamily. Cation-independent O- methyltransferase family
4113.PGSC0003DMT400097008	Histone H4; Core component of nucleosome. Nucleosomes wrap and compact DNA into chromatin, limiting DNA accessibility to the cellular machineries which require DNA as a template. Histones thereby play a central role in transcription regulation, DNA repair, DNA replication and chromosomal stability. DNA accessibility is regulated via a complex set of post-translational modifications of histones, a…
4113.PGSC0003DMT400097242	Uncharacterized protein; Cytochrome P450
4113.PGSC0003DMT400039809	Phosphoenolpyruvate carboxylase; Through the carboxylation of phosphoenolpyruvate (PEP) it forms oxaloacetate, a four-carbon dicarboxylic acid source for the tricarboxylic acid cycle
4113.PGSC0003DMT400029962	Uncharacterized protein; PEP carboxylase kinase; Belongs to the protein kinase superfamily
4113.PGSC0003DMT400010887	Uncharacterized protein; Thaumatin
4113.PGSC0003DMT400046973	Vetispiradiene synthase 1; Sesquiterpene synthase that catalyzes the formation of vetispiradiene from trans,trans-farnesyl diphosphate. The initial internal cyclization produces the monocyclic intermediate germacrene A
4113.PGSC0003DMT400012898	Uncharacterized protein; Glucan endo-1,3-beta-glucosidase; Belongs to the glycosyl hydrolase 17 family
4113.PGSC0003DMT400075291	Ribosomal protein S6; Belongs to the eukaryotic ribosomal protein eS6 family
4113.PGSC0003DMT400019451	S-adenosylmethionine decarboxylase beta chain; Belongs to the eukaryotic AdoMetDC family
4113.PGSC0003DMT400079161	Phospho-2-dehydro-3-deoxyheptonate aldolase 1, chloroplastic
4113.PGSC0003DMT400071184	Uncharacterized protein; C-8,7 sterol isomerase
4113.PGSC0003DMT400027843	Uncharacterized protein; SNI1
4113.PGSC0003DMT400071807	Probable sucrose-phosphate synthase; Plays a role in photosynthetic sucrose synthesis by catalyzing the rate-limiting step of sucrose biosynthesis from UDP-glucose and fructose- 6-phosphate. Involved in the regulation of carbon partitioning in the leaves of plants. May regulate the synthesis of sucrose and therefore play a major role as a limiting factor in the export of photoassimilates out of t…
4113.PGSC0003DMT400003356	Granule-bound starch synthase 2, chloroplastic/amyloplastic; Accounts for only 10 to 15% of the total soluble starch synthase activity in tubers; Belongs to the glycosyltransferase 1 family. Bacterial/plant glycogen synthase subfamily
4113.PGSC0003DMT400045604	Uncharacterized protein; High affinity sulfate transporter type 1
4113.PGSC0003DMT400056617	STS14 protein; May protect the outer tissues of the pistil from pathogen attack
4113.PGSC0003DMT400054145	Linoleate 9S-lipoxygenase 2; Plant lipoxygenases may be involved in a number of diverse aspects of plant physiology including growth and development, pest resistance, and senescence or responses to wounding. Catalyzes the hydroperoxidation of lipids containing a cis,cis-1,4-pentadiene structure. Linoleic acid is the preferred substrate, but is also active with linolenic and arachidonic acids
4113.PGSC0003DMT400079416	Tuber-specific and sucrose-responsive element binding factor
4113.PGSC0003DMT400034699	UTP--glucose-1-phosphate uridylyltransferase; Plays a central role as a glucosyl donor in cellular metabolic pathways; Belongs to the UDPGP type 1 family
4113.PGSC0003DMT400045665	Annexin p34
4113.PGSC0003DMT400027377	Uncharacterized protein; Allene oxide syntase; Belongs to the cytochrome P450 family
4113.PGSC0003DMT400061912	Ci21B protein
4113.PGSC0003DMT400043311	AP2/ERF-domain protein
4113.PGSC0003DMT400048741	Uncharacterized protein; Sulfate adenylyltransferase
4113.PGSC0003DMT400071048	Uncharacterized protein; 9-cis-epoxycarotenoid dioxygenase
4113.PGSC0003DMT400053511	Membrane protein
4113.PGSC0003DMT400038514	Peroxidase; Removal of H(2)O(2), oxidation of toxic reductants, biosynthesis and degradation of lignin, suberization, auxin catabolism, response to environmental stresses such as wounding, pathogen attack and oxidative stress

## Sheet: Downregulated genes
Downregulated genes from the genome-wide analysis
Identifier	Annotation
PGSC0003DMT400082728	Receptor-like protein 12; Uncharacterized protein; Conserved gene of unknown function (763 aa)
PGSC0003DMT400077762	Probable s-adenosylmethionine-dependent methyltransferase at5g38100; Uncharacterized protein; Conserved gene of unknown function (215 aa)
PGSC0003DMT400049821	Methylcrotonoyl-coa carboxylase subunit alpha, mitochondrial; Uncharacterized protein; Biotin-containing subunit of methylcrotonyl-CoA carboxylase (316 aa)
PGSC0003DMT400066793	Axial regulator yabby 1; Uncharacterized protein; YABBY1 (218 aa)
PGSC0003DMT400079148	7-deoxyloganetin glucosyltransferase-like; Glycosyltransferase; UDP-glucose:glucosyltransferase; Belongs to the UDP-glycosyltransferase family (472 aa)
PGSC0003DMT400031718	Cation/h(+) antiporter 18-like; Uncharacterized protein; Na(+)/H(+) antiporter (802 aa)
STWRKY8	Uncharacterized protein; Double WRKY type transfactor (534 aa)
PGSC0003DMT400007484	Receptor-like protein 12; Uncharacterized protein; Conserved gene of unknown function (988 aa)
PGSC0003DMT400008074	Uncharacterized protein; Chloroplast methionine sulfoxide reductase B2 (182 aa)
PGSC0003DMT400047659	Thylakoid lumenal 17.4 kDa protein, chloroplast (233 aa)
PGSC0003DMT400047023	Probable leucine-rich repeat receptor-like protein kinase at5g49770; Serine/threonine-protein kinase PBS1; Belongs to the protein kinase superfamily (947 aa)
PGSC0003DMT400012963	Disease resistance protein RGA3; Belongs to the disease resistance NB-LRR family (1139 aa)
PGSC0003DMT400032504	Uncharacterized loc102604889; Uncharacterized protein; Conserved gene of unknown function (218 aa)
PGSC0003DMT400000186	Probable serine/threonine-protein kinase at1g01540; Uncharacterized protein; BRASSINOSTEROID INSENSITIVE 1-associated receptor kinase 1 (501 aa)
PGSC0003DMT400026293	Uncharacterized protein; Conserved gene of unknown function (208 aa)
PGSC0003DMT400072405	Putative phytosulfokines 6; Uncharacterized protein; Phytosulfokine peptide (92 aa)
PGSC0003DMT400043686	Uncharacterized protein; Hydrolase, hydrolyzing O-glycosyl compounds; Belongs to the glycosyl hydrolase 5 (cellulase A) family (505 aa)
PGSC0003DMT400040199	3-ketoacyl-CoA synthase 3-like; Beta-ketoacyl-coa synthase family protein (464 aa)
PGSC0003DMT400081916	Uncharacterized protein; F-box protein family (304 aa)
PGSC0003DMT400022365	Nac transcription factor 25-like; NAC domain protein (245 aa)
PGSC0003DMT400062968	Uncharacterized loc102596863; Uncharacterized protein; Conserved gene of unknown function (295 aa)
PGSC0003DMT400049067	Probable leucine-rich repeat receptor-like protein kinase at2g33170; Uncharacterized protein; M18S-3Ap (932 aa)
PGSC0003DMT400000457	Uncharacterized loc102583787; Uncharacterized protein; Conserved gene of unknown function (642 aa)
PGSC0003DMT400009603	Transcription factor bhlh110; Uncharacterized protein; Transcription factor (406 aa)
PGSC0003DMT400031910	Metal-nicotianamine transporter ysl1; Uncharacterized protein; YS1 (674 aa)
PGSC0003DMT400007479	Receptor-like protein 12; Serine-threonine protein kinase, plant-type (383 aa)
PGSC0003DMT400027951	Monothiol glutaredoxin-s2-like; Uncharacterized protein; Monothiol glutaredoxin-S2 (102 aa)
PGSC0003DMT400078952	Uncharacterized loc102583348; Heat shock protein 70 (HSP70)-interacting protein (811 aa)
PGSC0003DMT400021622	Secoisolariciresinol dehydrogenase-like; Uncharacterized protein; Short chain alcohol dehydrogenase (279 aa)
PGSC0003DMT400007742	Uncharacterized protein; Cellular nucleic acid binding protein (487 aa)
PGSC0003DMT400015041	Uncharacterized protein; NIN 2 (959 aa)
PGSC0003DMT400028486	Uncharacterized protein; Tir-nbs-lrr resistance protein (207 aa)
GLUB1	Glucan endo-1,3-beta-glucosidase, basic isoform 1; Is thought to be an important plant defense-related product against fungal pathogens (331 aa)
PGSC0003DMT400084727	Arabidopsis histidine kinase 2/3/4 (cytokinin receptor); Uncharacterized protein; Histidine kinase 3B (538 aa)
PGSC0003DMT400017153	Premnaspirodiene oxygenase-like; Belongs to the cytochrome P450 family (180 aa)
PGSC0003DMT400071357	Uncharacterized loc102598874; Uncharacterized protein; Conserved gene of unknown function (284 aa)
PGSC0003DMT400005298	Cytochrome p450 family 77 subfamily a; Belongs to the cytochrome P450 family (508 aa)
PGSC0003DMT400002095	Abscisic acid 8'-hydroxylase 3-like; Belongs to the cytochrome P450 family (445 aa)
PGSC0003DMT400037485	4-coumarate--CoA ligase 2-like; Uncharacterized protein; 4-coumarate--CoA ligase 2 (548 aa)
PGSC0003DMT400038700	Trimethyltridecatetraene/dimethylnonatriene synthase; Belongs to the cytochrome P450 family (511 aa)
PGSC0003DMT400045248	Photosystem II 22 kDa protein, chloroplastic (276 aa)
PGSC0003DMT400080288	Zinc-finger homeodomain protein 10-like; ZF-HD homeobox protein (287 aa)
PGSC0003DMT400036777	Diphosphoinositol-polyphosphate diphosphatase; Uncharacterized protein; Nudix hydrolase 17, mitochondrial (283 aa)
PGSC0003DMT400063944	Uncharacterized protein; GRAS6; Belongs to the GRAS family (559 aa)
PGSC0003DMT400038095	Glycine-rich cell wall structural protein-like; Glycine-rich RNA-binding protein (346 aa)
PGSC0003DMT400047475	Probable cinnamyl alcohol dehydrogenase 9; Uncharacterized protein; Cinnamyl alcohol dehydrogenase (360 aa)
PGSC0003DMT400024422	Uncharacterized loc102600716; Uncharacterized protein; AR781 (363 aa)
PGSC0003DMT400058618	Uncharacterized protein; CONSTANS interacting protein 6 (531 aa)
PGSC0003DMT400028818	Alkyl transferase; Undecaprenyl pyrophosphate synthetase; Belongs to the UPP synthase family (310 aa)
PGSC0003DMT400022230	Dirigent protein 18-like; Dirigent protein; Dirigent proteins impart stereoselectivity on the phenoxy radical-coupling reaction, yielding optically active lignans from two molecules of coniferyl alcohol in the biosynthesis of lignans, flavonolignans, and alkaloids and thus plays a central role in plant secondary metabolism (247 aa)
PGSC0003DMT400029163	Uncharacterized protein; Eukaryotic translation initiation factor 3 subunit (851 aa)
PGSC0003DMT400067572	O-methyltransferase mdmc-like; O-methyltransferase family 3 protein (284 aa)
PGSC0003DMT400000423	Cytochrome p450 704c1-like; Uncharacterized protein; Cytochrome P450 monooxygenase (449 aa)
PGSC0003DMT400050070	Uncharacterized loc102588895; Calmodulin binding protein (410 aa)
PGSC0003DMT400026334	E3 ubiquitin-protein ligase RBBP6-like; Retinoblastoma-binding protein (444 aa)
NTH1	Endonuclease iii homolog 1, chloroplastic-like; Endonuclease III homolog; Bifunctional DNA N-glycosylase with associated apurinic/apyrimidinic (AP) lyase function that catalyzes the first step in base excision repair (BER), the primary repair pathway for the repair of oxidative DNA damage. The DNA N-glycosylase activity releases the damaged DNA base from DNA by cleaving the N- glycosidic bond, le…
PGSC0003DMT400075105	Burp domain-containing protein 5-like; BURP domain-containing protein (337 aa)
PGSC0003DMT400067474	Uncharacterized protein; Mutt domain protein (357 aa)
PGSC0003DMT400053122	Probable wrky transcription factor 70; DNA-binding protein 3 (277 aa)
PGSC0003DMT400006272	Alpha/beta hydrolase domain-containing protein 17b-like; Cgi67 serine protease (341 aa)
PGSC0003DMT400009420	15-cis-phytoene desaturase, chloroplastic/chromoplastic; Uncharacterized protein; Amine oxidase (478 aa)
PGSC0003DMT400049124	Transcription factor jungbrunnen 1-like; NAC domain protein (250 aa)
PGSC0003DMT400061873	Uncharacterized loc102594742; Uncharacterized protein; Conserved gene of unknown function (198 aa)
PGSC0003DMT400030278	Probable leucine-rich repeat receptor-like protein kinase at2g33170; Uncharacterized protein; BRASSINOSTEROID INSENSITIVE 1; Belongs to the protein kinase superfamily. Ser/Thr protein kinase family (1108 aa)
PGSC0003DMT400001575	Uncharacterized protein; Belongs to the peptidase S8 family (483 aa)
PGSC0003DMT400075413	Peroxidase 64-like; Peroxidase; Removal of H(2)O(2), oxidation of toxic reductants, biosynthesis and degradation of lignin, suberization, auxin catabolism, response to environmental stresses such as wounding, pathogen attack and oxidative stress (318 aa)
PGSC0003DMT400075517	Pentatricopeptide repeat-containing protein at5g66520-like; Selenium-binding protein (628 aa)
PGSC0003DMT400051228	Uncharacterized loc107058924; Uncharacterized protein; Conserved gene of unknown function (262 aa)
PGSC0003DMT400001087	Protein nuclear fusion defective 4; Nodulin family protein (573 aa)
PGSC0003DMT400032930	Transcription factor myb, plant; Uncharacterized protein; MYB transcription factor (252 aa)
PGSC0003DMT400075241	Uncharacterized protein; Polygalacturonase 5 (387 aa)
PGSC0003DMT400013987	Putative receptor-like protein kinase at3g47110; Uncharacterized protein; Receptor-kinase (1024 aa)
PGSC0003DMT400017493	Uncharacterized protein; PHD finger family protein (251 aa)
PGSC0003DMT400064585	Prolycopene isomerase 1, chloroplastic; Uncharacterized protein; All-trans-retinol 13,14-reductase (562 aa)
PGSC0003DMT400083158	Light-harvesting complex i chlorophyll a/b binding protein 4; Chlorophyll a-b binding protein, chloroplastic; The light-harvesting complex (LHC) functions as a light receptor, it captures and delivers excitation energy to photosystems with which it is closely associated (250 aa)
PGSC0003DMT400044654	Uncharacterized protein; CYP72A56; Belongs to the cytochrome P450 family (517 aa)
PGSC0003DMT400077933	Zinc finger protein zat11-like; Uncharacterized protein; ZPT2-8 (157 aa)
PGSC0003DMT400034395	Osmotin-like protein osml13; Uncharacterized protein; Osmotin (216 aa)
PGSC0003DMT400037826	Ethylene-responsive transcription factor 1b-like; Uncharacterized protein; Ethylene response factor (225 aa)
PGSC0003DMT400014354	Altered inheritance of mitochondria protein 3; Uncharacterized protein; Structural constituent of cell wall (428 aa)
ERF3	Ethylene-responsive transcription factor 5-like; Ethylene responsive element binding protein C2 (296 aa)
PGSC0003DMT400052331	Uncharacterized protein; Conserved gene of unknown function (333 aa)
PGSC0003DMT400018701	Uncharacterized protein; GDSL-lipase 1; Belongs to the 'GDSL' lipolytic enzyme family (366 aa)
PGSC0003DMT400064736	Casparian strip membrane protein 1; Regulates membrane-cell wall junctions and localized cell wall deposition. Required for establishment of the Casparian strip membrane domain (CSD) and the subsequent formation of Casparian strips, a cell wall modification of the root endodermis that determines an apoplastic barrier between the intraorganismal apoplasm and the extraorganismal apoplasm and preven…
PGSC0003DMT400063277	Protein strictosidine synthase-like 11-like; Uncharacterized protein; Conserved gene of unknown function (332 aa)
PGSC0003DMT400095618	Uncharacterized protein; RNA-directed DNA polymerase (Reverse transcriptase); Ribonuclease H (1053 aa)
PGSC0003DMT400021591	Uncharacterized loc102588850; VQ motif family protein (142 aa)
PGSC0003DMT400039007	Uncharacterized protein; Serine-threonine protein kinase, plant-type; Belongs to the protein kinase superfamily (427 aa)
PGSC0003DMT400023254	Uncharacterized loc102602499; Uncharacterized protein; PIT1 (230 aa)
PGSC0003DMT400050201	Serine/threonine-protein kinase d6pkl2-like; Serine/threonine protein kinase (461 aa)
PGSC0003DMT400032932	Disease resistance-like protein csa1; Belongs to the disease resistance NB-LRR family (815 aa)
PGSC0003DMT400021422	Light-harvesting complex ii chlorophyll a/b binding protein 1; Chlorophyll a-b binding protein, chloroplastic; The light-harvesting complex (LHC) functions as a light receptor, it captures and delivers excitation energy to photosystems with which it is closely associated (265 aa)
PGSC0003DMT400017451	Subtilisin-like protease sbt1.7; Belongs to the peptidase S8 family (782 aa)
PGSC0003DMT400005977	Photosystem ii stability/assembly factor hcf136, chloroplastic; Uncharacterized protein; Plastid high chlorophyll fluorescence 136 (393 aa)
PGSC0003DMT400011185	Uncharacterized protein; GDSL esterase/lipase; Belongs to the 'GDSL' lipolytic enzyme family (383 aa)
PGSC0003DMT400097155	F-box protein at4g18380-like; F-box family protein (350 aa)
PGSC0003DMT400015197	Putative axial regulator yabby 2; Uncharacterized protein; YABBY domain class transcription factor (191 aa)
PGSC0003DMT400059001	Myosin heavy chain kinase b-like; F-box and wd40 domain protein (459 aa)
PGSC0003DMT400002345	Chlorophyllide a oxygenase, chloroplastic-like; Uncharacterized protein; Chlorophyll synthase (535 aa)
PGSC0003DMT400031198	Ferredoxin-like; Ferredoxin; Ferredoxins are iron-sulfur proteins that transfer electrons in a wide variety of metabolic reactions (144 aa)
PGSC0003DMT400065996	Trans-resveratrol di-o-methyltransferase-like; Uncharacterized protein; Conserved gene of unknown function; Belongs to the class I-like SAM-binding methyltransferase superfamily. Cation-independent O- methyltransferase family (364 aa)
PGSC0003DMT400096975	Uncharacterized loc102592557; Tir-nbs resistance protein (969 aa)
PGSC0003DMT400022987	High-light-induced protein, chloroplastic; One helix protein (112 aa)
PGSC0003DMT400046727	Uncharacterized protein; ABC transporter A family member 2 (934 aa)
PGSC0003DMT400039492	Serine protease inhibitor 5-like; Uncharacterized protein; Kunitz-type protease inhibitor (221 aa)
PGSC0003DMT400045479	Uncharacterized loc102599305; Uncharacterized protein; Conserved gene of unknown function (378 aa)
Nac	Nac domain-containing protein 2; NAC domain protein (303 aa)
PGSC0003DMT400033246	Growth-regulating factor 9; Uncharacterized protein; Growth-regulating factor 10 (420 aa)
PGSC0003DMT400032057	Serine/threonine-protein kinase plk4-like; Serine-threonine protein kinase (971 aa)
PGSC0003DMT400025976	Uncharacterized protein; Geraniol 10-hydroxylase; Belongs to the cytochrome P450 family (413 aa)
Lhcb1-2	Light-harvesting complex ii chlorophyll a/b binding protein 1; Chlorophyll a-b binding protein, chloroplastic; The light-harvesting complex (LHC) functions as a light receptor, it captures and delivers excitation energy to photosystems with which it is closely associated (265 aa)
PGSC0003DMT400040518	8-hydroxygeraniol dehydrogenase-like; Uncharacterized protein; Cinnamyl alcohol dehydrogenase (356 aa)
PGSC0003DMT400071293	Transcription factor bhlh51-like; Uncharacterized protein; Transcription factor bHLH51 (224 aa)
PGSC0003DMT400048006	Pre-rrna-processing protein esf2-like; Uncharacterized protein; Activator of basal transcription (309 aa)
StWRKY15	Probable wrky transcription factor 3; Uncharacterized protein; WRKY transcription factor-c (451 aa)
PGSC0003DMT400023524	Uncharacterized loc102581761; Uncharacterized protein; Membrane receptor 1 (323 aa)
PGSC0003DMT400035970	Nac domain-containing protein 7; NAC domain-containing protein (169 aa)
PGSC0003DMT400048407	Ethylene-responsive transcription factor erf110-like; Uncharacterized protein; AP2/ERF domain-containing transcription factor (395 aa)
PGSC0003DMT400067280	Disease resistance rpp13-like protein 4; NBS-LRR type disease resistance protein; Belongs to the disease resistance NB-LRR family (883 aa)
BBX1	B-box zinc finger protein 1; CONSTANS (413 aa)
PGSC0003DMT400030968	Solute carrier family 40 (iron-regulated transporter), member 1; May be involved in iron transport and iron homeostasis (491 aa)
PGSC0003DMT400083083	Nac domain-containing protein 100-like; Uncharacterized protein; Nam 18 (336 aa)
PGSC0003DMT400079158	Uncharacterized protein; Phi-1 protein (311 aa)
PGSC0003DMT400000036	Uncharacterized protein; Gibberellin 20-oxidase 4; Belongs to the iron/ascorbate-dependent oxidoreductase family (365 aa)
PGSC0003DMT400076159	Uncharacterized loc102604008; Uncharacterized protein; Gene of unknown function (441 aa)
PGSC0003DMT400044217	Malate dehydrogenase-like protein; Malate dehydrogenase (332 aa)
PGSC0003DMT400079571	Carbonic anhydrase 2; Carbonic anhydrase; Reversible hydration of carbon dioxide (256 aa)
PGSC0003DMT400013741	Uncharacterized loc102601210; Uncharacterized protein; ST225 (117 aa)
PGSC0003DMT400044460	Uncharacterized protein; Cellulose synthase; Belongs to the glycosyltransferase 2 family (638 aa)
PGSC0003DMT400065428	1-aminocyclopropane-1-carboxylate oxidase homolog 1-like; Uncharacterized protein; Desacetoxyvindoline 4-hydroxylase; Belongs to the iron/ascorbate-dependent oxidoreductase family (368 aa)
PGSC0003DMT400054837	Uncharacterized loc102601991; Uncharacterized protein; Conserved gene of unknown function (159 aa)
Phylloplanin-like	Uncharacterized protein; Phylloplanin (155 aa)
PGSC0003DMT400069311	Long chain base biosynthesis protein 2a-like; Uncharacterized protein; Serine palmitoyltransferase (489 aa)
PGSC0003DMT400015560	Uncharacterized protein; Geraniol 10-hydroxylase; Belongs to the cytochrome P450 family (495 aa)
PGSC0003DMT400006734	Uncharacterized loc102580149; Avr9/Cf-9 rapidly elicited protein 146 (209 aa)
PGSC0003DMT400009745	Receptor-like cytosolic serine/threonine-protein kinase rbk2; ATP binding protein; Belongs to the protein kinase superfamily (440 aa)
PGSC0003DMT400028801	Uncharacterized protein at1g04910-like; Axi 1 protein from Nicotiana tabacum (641 aa)
PGSC0003DMT400040149	Transcription factor myb, plant; Uncharacterized protein; MYB1-2 (218 aa)
PGSC0003DMT400015698	Probable serine/threonine-protein kinase wnk11; ATP binding protein (290 aa)
PGSC0003DMT400079394	Solute carrier family 29 (equilibrative nucleoside transporter), member 1/2/3; Uncharacterized protein; Equilibrative nucleoside transporter (407 aa)
CDF1.2	Uncharacterized protein; Zinc finger protein (442 aa)
PGSC0003DMT400052592	Probable transcription repressor ofp9; Uncharacterized protein; Conserved gene of unknown function (166 aa)
BCE2	Lipoamide acyltransferase component of branched-chain alpha-keto acid dehydrogenase complex, mitochondrial; Dihydrolipoamide acetyltransferase component of pyruvate dehydrogenase complex; Branched-chain alpha-keto acid dehydrogenase E2 subunit (505 aa)
PGSC0003DMT400091491	Anther-specific protein ta-29-like; Anther-specific protein TA-29 (333 aa)
PGSC0003DMT400042642	Uncharacterized protein; Mitochondrial carnitine/acylcarnitine carrier protein; Belongs to the mitochondrial carrier (TC 2.A.29) family (315 aa)
PGSC0003DMT400010109	Flavonoid 3',5'-hydroxylase-like; Belongs to the cytochrome P450 family (517 aa)
PGSC0003DMT400042499	F-type h+-transporting atpase subunit gamma; Uncharacterized protein; ATP synthase gamma chain, chloroplastic (377 aa)
PGSC0003DMT400025858	Niemann-pick c1 protein-like; Uncharacterized protein; Hedgehog receptor (584 aa)
PGSC0003DMT400002565	Protein gamete expressed 1; Uncharacterized protein; GEX1 (463 aa)
PGSC0003DMT400029392	Plasma membrane-associated cation-binding protein 1; Uncharacterized protein; Plasma membrane polypeptide (202 aa)
PGSC0003DMT400078147	Dirigent protein 25-like; Dirigent protein; Dirigent proteins impart stereoselectivity on the phenoxy radical-coupling reaction, yielding optically active lignans from two molecules of coniferyl alcohol in the biosynthesis of lignans, flavonolignans, and alkaloids and thus plays a central role in plant secondary metabolism (330 aa)
PGSC0003DMT400015387	Uncharacterized protein; Receptor kinase (545 aa)
PGSC0003DMT400023662	Uncharacterized loc102583491; Uncharacterized protein; Triacylglycerol lipase (549 aa)
PGSC0003DMT400041753	Udp-glycosyltransferase 91a1-like; Uncharacterized protein; Anthocyanidine rhamnosyl-transferase (470 aa)
PGSC0003DMT400053212	Uncharacterized loc102585688; Uncharacterized protein; Conserved gene of unknown function (179 aa)
PGSC0003DMT400049613	Indole-3-acetic acid-amido synthetase GH3.6-like; Uncharacterized protein; Indole-3-acetic acid-amido synthetase GH3.6 (607 aa)
PGSC0003DMT400080928	Cytochrome p450 83b1-like; Belongs to the cytochrome P450 family (496 aa)
PGSC0003DMT400020589	Uncharacterized protein; ABA 8'-hydroxylase CYP707A2; Belongs to the cytochrome P450 family (475 aa)
PGSC0003DMT400041350	Probable lrr receptor-like serine/threonine-protein kinase at3g47570; Uncharacterized protein; Conserved gene of unknown function; Belongs to the protein kinase superfamily. Ser/Thr protein kinase family (1132 aa)
PGSC0003DMT400057793	Stem-specific protein tsjt1-like; Stem-specific protein TSJT1 (255 aa)
PGSC0003DMT400063237	Udp-glycosyltransferase 90a1-like; Glycosyltransferase UGT90A7; Belongs to the UDP-glycosyltransferase family (464 aa)
PGSC0003DMT400071165	Pentatricopeptide repeat-containing protein at1g55890, mitochondrial-like; Pentatricopeptide repeat-containing protein (176 aa)
PGSC0003DMT400078423	Uncharacterized loc102589189; Uncharacterized protein; Gamma-glutamyl-gamma-aminobutyrate hydrolase (567 aa)
PGSC0003DMT400074985	Uncharacterized loc102596732; Zinc finger family protein (499 aa)
PGSC0003DMT400010112	Trihelix transcription factor gt-2-like; GT2 protein (503 aa)
PGSC0003DMT400006042	Uncharacterized protein; CYP72A58; Belongs to the cytochrome P450 family (514 aa)
PGSC0003DMT400038525	S-(hydroxymethyl)glutathione dehydrogenase / alcohol dehydrogenase; Uncharacterized protein; Alcohol dehydrogenase (377 aa)
PETE	Plastocyanin, chloroplastic; Plastocyanin; Participates in electron transfer between P700 and the cytochrome b6-f complex in photosystem I (170 aa)
PGSC0003DMT400009192	Ferredoxin--NADP reductase, leaf-type isozyme, chloroplastic (362 aa)
PGSC0003DMT400050270	Probable e3 ubiquitin-protein ligase rnf217; Zinc finger protein (264 aa)
PGSC0003DMT400035365	B3 domain-containing protein REM10-like; DNA binding protein (309 aa)
Nephrocystin-3	Uncharacterized protein; Kinesin light chain (210 aa)
PGSC0003DMT400023711	AP2-like ethylene-responsive transcription factor AIL1; Uncharacterized protein; AP2 domain-containing transcription factor (275 aa)
PGSC0003DMT400003907	Uncharacterized loc102585003; Uncharacterized protein; Conserved gene of unknown function (309 aa)
PGSC0003DMT400034220	Glutamate-rich wd repeat-containing protein 1-like; WD-40 repeat protein (469 aa)
PGSC0003DMT400079267	Probable acyl-activating enzyme 1, peroxisomal; Adenosine monophosphate binding protein 1 AMPBP1 (553 aa)
PGSC0003DMT400044283	Protein proton gradient regulation 5, chloroplastic; Uncharacterized protein; Proton gradient regulation 5 (119 aa)
PGSC0003DMT400061535	Abscisic acid receptor pyr/pyl family; Uncharacterized protein; Abscisic acid receptor PYL4 (218 aa)
BBX5	Zinc finger protein constans-like 4-like; B-box zinc finger protein 5; CONSTANS (347 aa)
PGSC0003DMT400040845	Uncharacterized protein; Short-chain dehydrogenase; Belongs to the short-chain dehydrogenases/reductases (SDR) family (313 aa)
PGSC0003DMT400056172	F-box protein at5g07610-like; F-box protein (385 aa)
PGSC0003DMT400046700	Uncharacterized protein; CYP71AU1; Belongs to the cytochrome P450 family (433 aa)
ACO2	1-aminocyclopropane-1-carboxylate oxidase; Belongs to the iron/ascorbate-dependent oxidoreductase family (319 aa)
PGSC0003DMT400066507	Uncharacterized acetyltransferase at3g50280-like; Anthranilate N-benzoyltransferase protein (470 aa)
PGSC0003DMT400056173	Uncharacterized loc102586040; Uncharacterized protein; Conserved gene of unknown function (338 aa)
PGSC0003DMT400057191	Putative aconitate hydratase, cytoplasmic; Aconitate hydratase; Catalyzes the isomerization of citrate to isocitrate via cis-aconitate (945 aa)
PGSC0003DMT400073695	Protein too many mouths; Serine-threonine protein kinase, plant-type (459 aa)
PGSC0003DMT400025851	Btb/poz domain-containing protein at2g30600; BTB/POZ domain-containing protein (803 aa)
PGSC0003DMT400082714	Uncharacterized loc102603587; Uncharacterized protein; Conserved gene of unknown function (575 aa)
PGSC0003DMT400032434	Uncharacterized loc102605866; Disease resistance protein (TIR class) (1110 aa)
PGSC0003DMT400012004	Uncharacterized loc102600818; Uncharacterized protein; Fringe (339 aa)
PGSC0003DMT400079980	Probable wrky transcription factor 51; Uncharacterized protein; WRKY transcription factor (231 aa)
PGSC0003DMT400063214	Uncharacterized protein at5g50100, mitochondrial; Uncharacterized protein; PBng143 (218 aa)
PGSC0003DMT400038283	Tyramine n-feruloyltransferase 4/11-like; Uncharacterized protein; Tyramine hydroxycinnamoyl transferase (246 aa)
PGSC0003DMT400049097	Uncharacterized protein; Conserved gene of unknown function; Belongs to the disease resistance NB-LRR family (668 aa)
PGSC0003DMT400009577	Maf-like protein ddb_g0281937; Maf protein (231 aa)
PGSC0003DMT400049166	Salicylate carboxymethyltransferase-like; Uncharacterized protein; S-adenosyl-L-methionine:salicylic acid carboxyl methyltransferase 1 (354 aa)
PGSC0003DMT400055412	Probable leucine-rich repeat receptor-like protein kinase at1g35710; Receptor protein kinase (818 aa)
PGSC0003DMT400011867	Udp-glucuronate 4-epimerase 6-like; Uncharacterized protein; UDP-D-glucuronic acid 4-epimerase (454 aa)
PGSC0003DMT400004686	Beta-amylase PCT-BMYI (545 aa)
PGSC0003DMT400047496	Long-chain-alcohol oxidase fao4a-like; Long-chain-alcohol oxidase; Long-chain fatty alcohol oxidase involved in the omega- oxidation pathway of lipid degradation (773 aa)
PGSC0003DMT400067678	Sarcosine oxidase / l-pipecolate oxidase; Uncharacterized protein; Sarcosine oxidase (408 aa)
PGSC0003DMT400062906	Calmodulin-binding protein 60 a-like; Uncharacterized protein; Gene of unknown function (149 aa)
PGSC0003DMT400056635	Photosystem i reaction center subunit iv b, chloroplastic; Uncharacterized protein; Photosystem I reaction center subunit IV B isoform 2 (141 aa)
PHT2	Solute carrier family 20 (sodium-dependent phosphate transporter); Phosphate transporter; Sodium-phosphate symporter which plays a fundamental housekeeping role in phosphate transport (581 aa)
PGSC0003DMT400086002	Cis-zeatin o-glucosyltransferase; Glycosyltransferase; Glucosyltransferase; Belongs to the UDP-glycosyltransferase family (474 aa)
PGSC0003DMT400009990	Subtilisin-like protease sbt1.7; Belongs to the peptidase S8 family (747 aa)
PGSC0003DMT400037148	3-hexulose-6-phosphate isomerase; Sugar isomerase domain-containing protein (202 aa)
PGSC0003DMT400061280	Pleiotropic drug resistance protein 1; Belongs to the ABC transporter superfamily. ABCG family. PDR (TC 3.A.1.205) subfamily (1435 aa)
PGSC0003DMT400027947	Monothiol glutaredoxin-s1-like; Uncharacterized protein; Glutaredoxin (102 aa)
PGSC0003DMT400060839	Zinc finger protein gis-like; Nucleic acid binding protein (238 aa)
PGSC0003DMT400020192	Phospholipase a1-iidelta-like; Uncharacterized protein; Triacylglycerol lipase (412 aa)
Aap1	Uncharacterized protein; Amino acid transporter (481 aa)
PGSC0003DMT400009127	Fructose-bisphosphate aldolase 1, chloroplastic-like; Belongs to the class I fructose-bisphosphate aldolase family (395 aa)
PGSC0003DMT400078145	Exocyst complex component exo70a1-like; Component of the exocyst complex (624 aa)
PGSC0003DMT400006494	Uncharacterized loc102582031; Uncharacterized protein; Conserved gene of unknown function (112 aa)
PGSC0003DMT400075244	Cytosolic fe-s cluster assembly factor nbp35-like; Nucleotide-binding protein (300 aa)
PGSC0003DMT400003234	Uncharacterized loc102579101; Uncharacterized protein; Electron carrier (156 aa)
PGSC0003DMT400042668	Uncharacterized protein; Conserved gene of unknown function (102 aa)
PGSC0003DMT400023502	Probable wrky transcription factor 30; Uncharacterized protein; WRKY transcription factor (356 aa)
PGSC0003DMT400027687	Methylmalonate-semialdehyde dehydrogenase [acylating], mitochondrial-like; Uncharacterized protein; Aldehyde dehydrogenase (88 aa)
PGSC0003DMT400080936	Cold and drought-regulated protein cora-like; Glycine-rich cell wall structural protein 1.8 (320 aa)
PGSC0003DMT400072432	Uncharacterized protein; Aquaporin TIP1;3; Belongs to the MIP/aquaporin (TC 1.A.8) family (248 aa)
PGSC0003DMT400019863	Sulfate transporter 3.1-like; Uncharacterized protein; Sulfate/bicarbonate/oxalate exchanger and transporter sat-1 (657 aa)
PGSC0003DMT400057781	Polyphenol oxidase, chloroplastic-like; Uncharacterized protein; Polyphenoloxidase (539 aa)
PGSC0003DMT400058625	Zinc finger protein 3-like; Uncharacterized protein; Conserved gene of unknown function (297 aa)
PGSC0003DMT400077962	PGR5-like protein 1B, chloroplastic; Uncharacterized protein; Conserved gene of unknown function (286 aa)
Cyclin-U4-1-like	Uncharacterized protein; Belongs to the cyclin family (203 aa)
PGSC0003DMT400010618	Leucine-rich repeat receptor-like protein kinase pxl1; Belongs to the protein kinase superfamily. Ser/Thr protein kinase family (1012 aa)
PGSC0003DMT400002733	Heme-binding-like protein at3g10130, chloroplastic; Soul heme-binding family protein (384 aa)
PGSC0003DMT400057528	Cannabidiolic acid synthase-like 2; Uncharacterized protein; FAD-linked oxidoreductase 1; Belongs to the oxygen-dependent FAD-linked oxidoreductase family (538 aa)
PGSC0003DMT400039544	Proteinase inhibitor type-2 CEVI57 (200 aa)
PGSC0003DMT400056767	Cytochrome p450 cyp82d47-like; Belongs to the cytochrome P450 family (521 aa)
PGSC0003DMT400069485	Tetrapyrrole-binding protein, chloroplastic; Tetrapyrrole-binding protein, chloroplast (264 aa)
PGSC0003DMT400041064	Uncharacterized loc107058148; Uncharacterized protein; AP2/ERF domain-containing transcription factor (457 aa)
PGSC0003DMT400001238	Gaba transporter 1-like; Uncharacterized protein; Amino acid transporter (453 aa)
PGSC0003DMT400065512	Isocitrate lyase; Belongs to the isocitrate lyase/PEP mutase superfamily. Isocitrate lyase family (575 aa)
PGSC0003DMT400027948	Monothiol glutaredoxin-s1-like; Uncharacterized protein; Glutaredoxin (102 aa)
PGSC0003DMT400067535	Ethylene-responsive transcription factor 2-like; Uncharacterized protein; ATERF-2/ATERF2/ERF2 (234 aa)
PGSC0003DMT400035056	Probable inactive poly [adp-ribose] polymerase sro2; Poly [ADP-ribose] polymerase; Conserved gene of unknown function (332 aa)
PGSC0003DMT400042531	Uncharacterized loc102599951; Uncharacterized protein; Conserved gene of unknown function (173 aa)
PGSC0003DMT400048145	Putative amidase c869.01; Amidase family protein (505 aa)
PGSC0003DMT400076173	Uncharacterized loc102578368; Serine/threonine protein kinase (1234 aa)
PGSC0003DMT400024175	Mechanosensitive ion channel protein 3, chloroplastic-like; Uncharacterized protein; Conserved gene of unknown function (710 aa)
PGSC0003DMT400081860	Uncharacterized protein (803 aa)
PGSC0003DMT400041649	Dicarboxylate transporter 2.1, chloroplastic-like; Uncharacterized protein; 2-oxoglutarate/malate translocator (508 aa)
PGSC0003DMT400045804	Uncharacterized protein; MADS-box protein 15 (225 aa)
PGSC0003DMT400060777	Probable lrr receptor-like serine/threonine-protein kinase at3g47570; Serine-threonine protein kinase, plant-type; Belongs to the protein kinase superfamily. Ser/Thr protein kinase family (1105 aa)
PGSC0003DMT400074239	Uncharacterized loc102588314; Uncharacterized protein; Conserved gene of unknown function (131 aa)
PGSC0003DMT400081462	G-type lectin s-receptor-like serine/threonine-protein kinase rlk1; Belongs to the protein kinase superfamily. Ser/Thr protein kinase family (785 aa)
PGSC0003DMT400040576	Lrr receptor-like serine/threonine-protein kinase fls2; Uncharacterized protein; Conserved gene of unknown function (1387 aa)
PGSC0003DMT400038981	Magnesium transporter mrs2-i-like; Magnesium transporter that may mediate the influx of magnesium (377 aa)
PGSC0003DMT400024676	Uncharacterized protein; DNA binding protein (425 aa)
PGSC0003DMT400041179	Alpha-aminoadipic semialdehyde synthase-like; Uncharacterized protein; Aminoadipic semialdehyde synthase (523 aa)
PGSC0003DMT400063125	Flavin-containing monooxygenase fmo gs-ox-like 9; Dimethylaniline monooxygenase (455 aa)
PGSC0003DMT400067520	Uncharacterized loc102595591; Uncharacterized protein; Conserved gene of unknown function (135 aa)
PGSC0003DMT400024461	F-box protein at2g32560-like; F-box family protein (427 aa)
RSI5	Uncharacterized protein; Jasmonic acid 2 (351 aa)
PGSC0003DMT400000932	Transcription factor myb, plant; Uncharacterized protein; Myb (289 aa)
PGSC0003DMT400010175	WAT1-related protein At1g68170-like; Uncharacterized protein; Structural molecule (415 aa)
PGSC0003DMT400050430	Serine/threonine-protein phosphatase 2b regulatory subunit; Uncharacterized protein; Calcineurin B 04 (214 aa)
PGSC0003DMT400057598	Uncharacterized loc102583615; Uncharacterized protein; Structural constituent of cell wall (320 aa)
PGSC0003DMT400079037	Ring finger and chy zinc finger domain-containing protein 1; Zinc finger family protein (254 aa)
PGSC0003DMT400075158	Trans-resveratrol di-o-methyltransferase-like; Uncharacterized protein; Conserved gene of unknown function; Belongs to the class I-like SAM-binding methyltransferase superfamily. Cation-independent O- methyltransferase family (353 aa)
PGSC0003DMT400050783	Uncharacterized protein; Cytochrome P450 monooxygenase CYP736B (471 aa)
PGSC0003DMT400021019	Cis-zeatin o-glucosyltransferase; Glycosyltransferase; Glucosyltransferase; Belongs to the UDP-glycosyltransferase family (473 aa)
PGSC0003DMT400020496	E3 ubiquitin-protein ligase RMA1H1-like; E3 ubiquitin-protein ligase RMA1H1 (235 aa)
PGSC0003DMT400072653	Crooked neck-like protein 1; Crooked neck protein (666 aa)
PGSC0003DMT400039210	Uncharacterized protein; KDEL-tailed cysteine endopeptidase; Belongs to the peptidase C1 family (360 aa)
BBX20	B-box zinc finger protein 20; Fructokinase 2 (233 aa)
PGSC0003DMT400058453	Uncharacterized loc102598914; Forkhead-associated domain-containing protein (202 aa)
PGSC0003DMT400012207	14 kDa proline-rich protein DC2.15-like; P-rich protein EIG-I30 (140 aa)
PGSC0003DMT400013962	Aaa-atpase at2g46620-like; ATP binding protein (509 aa)
PGSC0003DMT400017048	Receptor-like protein 12; Uncharacterized protein; Cf-2.1 (877 aa)
PGSC0003DMT400022265	Photosynthetic ndh subunit of subcomplex b 2, chloroplastic; Uncharacterized protein; Galactose mutarotase (347 aa)
PGSC0003DMT400018494	5-O-(4-coumaroyl)-D-quinate 3'-monooxygenase; Uncharacterized protein; P-coumaroyl quinate/shikimate 3'-hydroxylase; Belongs to the cytochrome P450 family (509 aa)
PGSC0003DMT400048249	Fatty acid omega-hydroxylase; Uncharacterized protein; Cytochrome P450-dependent fatty acid hydroxylase (504 aa)
PGSC0003DMT400044590	Uncharacterized loc102605417; Uncharacterized protein; ATFP4 (131 aa)
PGSC0003DMT400058378	Casp-like protein 1e2; UPF0497 membrane protein 10; Belongs to the Casparian strip membrane proteins (CASP) family (194 aa)
PGSC0003DMT400028039	Uncharacterized protein; Conserved gene of unknown function (338 aa)
PGSC0003DMT400022056	Glucan 1,3-beta-glucosidase-like; Cellulase containing protein; Belongs to the glycosyl hydrolase 5 (cellulase A) family (511 aa)
PGSC0003DMT400044605	Uncharacterized protein; Zinc finger family protein (294 aa)
PGSC0003DMT400039851	Subtilisin-like protease sbt1.7; Belongs to the peptidase S8 family (749 aa)
PGSC0003DMT400047168	Uncharacterized loc102595357; Uncharacterized protein; Conserved gene of unknown function (75 aa)
PGSC0003DMT400052816	Type i inositol polyphosphate 5-phosphatase ip5p1/2; Uncharacterized protein; Inositol-1,4,5-triphosphate-5-phosphatase (619 aa)
PGSC0003DMT400008496	Uncharacterized loc102590196; Uncharacterized protein; ACI112 (341 aa)
PGSC0003DMT400031370	Trans-resveratrol di-o-methyltransferase-like; Uncharacterized protein; O-methyltransferase; Belongs to the class I-like SAM-binding methyltransferase superfamily. Cation-independent O- methyltransferase family (266 aa)
PGSC0003DMT400007554	Putative late blight resistance protein homolog r1a-10; Disease resistance protein BS2 (324 aa)
PGSC0003DMT400072408	Cytochrome p450 76a2-like; Belongs to the cytochrome P450 family (506 aa)
PGSC0003DMT400039770	Uncharacterized loc102584213; Uncharacterized protein; Conserved gene of unknown function (573 aa)
PGSC0003DMT400028817	Alkyl transferase; Undecaprenyl pyrophosphate synthetase; Belongs to the UPP synthase family (313 aa)
PGSC0003DMT400065418	Uncharacterized loc102592329; Uncharacterized protein; Conserved gene of unknown function (764 aa)
PGSC0003DMT400047295	Uncharacterized protein; LRR receptor-like kinase (792 aa)
PGSC0003DMT400019550	Transcription factor bhlh36-like; DNA binding protein (214 aa)
PGSC0003DMT400009063	Aaa-atpase at2g18193-like; Uncharacterized protein; AAA-type ATPase; Belongs to the AAA ATPase family (508 aa)
PGSC0003DMT400039995	Probable polyol transporter 6; Uncharacterized protein; Sugar transporter; Belongs to the major facilitator superfamily. Sugar transporter (TC 2.A.1.1) family (461 aa)
PGSC0003DMT400002883	Uncharacterized loc102591467; Zinc knuckle (CCHC-type) family protein (979 aa)
PGSC0003DMT400069570	Solute carrier family 25 (mitochondrial phosphate transporter), member 3; Mitochondrial phosphate carrier protein; Belongs to the mitochondrial carrier (TC 2.A.29) family (359 aa)
PGSC0003DMT400016260	Telomere repeat-binding protein 4-like; Telomere binding protein TBP1 (670 aa)
PGSC0003DMT400038758	Calmodulin-binding transcription activator 2-like; Uncharacterized protein; Calmodulin-binding transcription activator (Camta), plants (815 aa)
PGSC0003DMT400079767	Malate dehydrogenase [nadp], chloroplastic; Uncharacterized protein; Malate dehydrogenase (438 aa)
PGSC0003DMT400014840	Mitochondrial pyruvate carrier 1-like; Mitochondrial pyruvate carrier; Mediates the uptake of pyruvate into mitochondria (102 aa)
PGSC0003DMT400062692	Uncharacterized loc102595245; Uncharacterized protein; Conserved gene of unknown function (200 aa)
PGSC0003DMT400080854	Probable receptor-like protein kinase at1g67000; Uncharacterized protein; Conserved gene of unknown function (514 aa)
PGSC0003DMT400058277	UPF0481 protein At3g47200-like; Uncharacterized protein; Conserved gene of unknown function (457 aa)
PGSC0003DMT400015433	Uncharacterized protein; Cytochrome P450 (473 aa)
PGSC0003DMT400029758	Uncharacterized loc102578723; Uncharacterized protein; Transcription factor (402 aa)
PGSC0003DMT400031890	Probable inactive purple acid phosphatase 27; Purple acid phosphatase; Hydrolase (608 aa)
PGSC0003DMT400063400	Uncharacterized protein; Brassinosteroid LRR receptor kinase; Belongs to the protein kinase superfamily. Ser/Thr protein kinase family (1093 aa)
PGSC0003DMT400064512	Xanthoxin dehydrogenase-like; Uncharacterized protein; Short-chain dehydrogenase/reductase (280 aa)
PGSC0003DMT400065994	Trans-resveratrol di-o-methyltransferase-like; Uncharacterized protein; Conserved gene of unknown function; Belongs to the class I-like SAM-binding methyltransferase superfamily. Cation-independent O- methyltransferase family (353 aa)
PGSC0003DMT400041580	Dof zinc finger protein dof5.7; Zinc finger protein (378 aa)
PGSC0003DMT400081461	G-type lectin s-receptor-like serine/threonine-protein kinase rlk1; Belongs to the protein kinase superfamily. Ser/Thr protein kinase family (785 aa)
RBOHC	Respiratory burst oxidase homolog protein C; Calcium-dependent NADPH oxidase that generates superoxide. May be responsible for the oxidative burst in response to pathogen attack in the leaves (938 aa)
PGSC0003DMT400073396	Probable wrky transcription factor 40; Uncharacterized protein; WRKY transcription factor 1 (360 aa)
PGSC0003DMT400071003	Lignin-forming anionic peroxidase-like; Cell wall peroxidase; Belongs to the peroxidase family. Classical plant (class III) peroxidase subfamily (300 aa)
PGSC0003DMT400020229	Uncharacterized loc107061083; Stress induced protein (132 aa)
PGSC0003DMT400010550	Serine/threonine-protein kinase PBS1; Belongs to the protein kinase superfamily (361 aa)
PGSC0003DMT400041204	Uncharacterized protein; Retrotransposon protein (185 aa)
PGSC0003DMT400020171	Uncharacterized protein; Integral membrane protein (338 aa)
PGSC0003DMT400065823	Uncharacterized protein; NDR1 (220 aa)
PGSC0003DMT400049062	Uncharacterized protein; Sn-1 protein (147 aa)
PGSC0003DMT400032636	Uncharacterized loc102598848; Uncharacterized protein; Conserved gene of unknown function (215 aa)
PGSC0003DMT400016911	Serine/threonine-protein kinase stn7, chloroplastic; Serine/threonine protein kinase; Belongs to the protein kinase superfamily (495 aa)
PGSC0003DMT400070362	Glycosyltransferase family protein 64 protein c5; Uncharacterized protein; Transferase, transferring glycosyl groups (768 aa)
PGSC0003DMT400001297	Carbonic anhydrase, chloroplastic; Carbonic anhydrase; Reversible hydration of carbon dioxide (321 aa)
PGSC0003DMT400014020	Peroxisomal fatty acid beta-oxidation multifunctional protein aim1-like; Multifunctional protein (721 aa)
PGSC0003DMT400045404	Uncharacterized loc102595795; Uncharacterized protein; Isoamylase N-terminal domain containing protein (526 aa)
PGSC0003DMT400034063	Uncharacterized protein; Disease resistance protein Gpa2; Belongs to the disease resistance NB-LRR family (808 aa)
PGSC0003DMT400042714	Abc transporter f family member 5; Uncharacterized protein; ATGCN5 (695 aa)
PGSC0003DMT400008366	Auxin-responsive protein saur32-like; SAUR family protein (114 aa)
PGSC0003DMT400000553	1-aminocyclopropane-1-carboxylate synthase 1/2/6; Uncharacterized protein; 1-aminocyclopropane-1-carboxylate synthase 2 (486 aa)
PGSC0003DMT400072727	Cytosolic sulfotransferase 12-like; Flavonol 4'-sulfotransferase; Belongs to the sulfotransferase 1 family (332 aa)
PGSC0003DMT400001226	Uncharacterized protein; Magnesium transporter that may mediate the influx of magnesium (392 aa)
PGSC0003DMT400043285	LMBR1 domain-containing protein 2 homolog A-like; LMBR1 integral membrane protein (304 aa)
PGSC0003DMT400055296	Probable disease resistance protein at1g12280; Nbs-lrr resistance protein; Belongs to the disease resistance NB-LRR family (855 aa)
PGSC0003DMT400085559	Anaerobic basic leucine zipper protein (138 aa)
PGSC0003DMT400059360	Putative late blight resistance protein homolog r1b-23; Disease resistance protein; Belongs to the disease resistance NB-LRR family (1243 aa)
PGSC0003DMT400047408	3''-deamino-3''-oxonicotianamine reductase; Uncharacterized protein; Chalcone reductase (324 aa)
PGSC0003DMT400072554	Calcium-dependent protein kinase 26-like; Calcium-dependent protein kinase CDPK12 (607 aa)
PGSC0003DMT400037740	Uncharacterized loc102584245; Uncharacterized protein; Conserved gene of unknown function (645 aa)
PGSC0003DMT400015341	Uncharacterized loc102594051; Uncharacterized protein; Conserved gene of unknown function (269 aa)
PGSC0003DMT400063790	Glycolipid transfer protein 3; Uncharacterized protein; Conserved gene of unknown function (242 aa)
PGSC0003DMT400075309	Uncharacterized loc102588972; Uncharacterized protein; Conserved gene of unknown function (250 aa)
PGSC0003DMT400021584	Uncharacterized protein; Beta-1,3-glucanase, acidic; Belongs to the glycosyl hydrolase 17 family (479 aa)
PGSC0003DMT400018099	Uncharacterized protein; 1-O-acylglucose:anthocyanin-O-acyltransferase; Belongs to the peptidase S10 family (472 aa)
PGSC0003DMT400020437	Alpha-1,4-galacturonosyltransferase; Hexosyltransferase; Glycosyltransferase QUASIMODO1; Belongs to the glycosyltransferase 8 family (579 aa)
PGSC0003DMT400045222	Protein nuclear fusion defective 4-like; Uncharacterized protein; Conserved gene of unknown function (572 aa)
PGSC0003DMT400094865	Uncharacterized protein; Conserved gene of unknown function (286 aa)
PGSC0003DMT400052486	Serine/threonine-protein kinase sty17-like; Integrin-linked protein kinase (469 aa)
PGSC0003DMT400038128	Protein sulfur deficiency-induced 1-like; Uncharacterized protein; Conserved gene of unknown function (287 aa)
PGSC0003DMT400019773	Cytochrome p450 cyp736a12-like; Belongs to the cytochrome P450 family (383 aa)
PGSC0003DMT400033769	Vacuolar protein sorting-associated protein ist1; Uncharacterized protein; Conserved gene of unknown function (427 aa)
PGSC0003DMT400079599	Polygalacturonase-1 non-catalytic subunit beta-like; Uncharacterized protein; Polygalacturonase-1 non-catalytic subunit beta (619 aa)
PGSC0003DMT400007438	Probable peroxygenase 5; Calcium ion binding protein (193 aa)
PGSC0003DMT400047799	Histidine-containing phosphotransfer protein 4-like; Histidine phosphotransfer protein (137 aa)
PGSC0003DMT400056891	Zinc finger protein constans-like 2; Uncharacterized protein; Activator of sporamin LUC 2 (213 aa)
PGSC0003DMT400034171	Uncharacterized loc102592680; Uncharacterized protein; Conserved gene of unknown function (114 aa)
PGSC0003DMT400000688	Uncharacterized protein; Trehalose-6-phosphate synthase (631 aa)
PGSC0003DMT400069799	Uncharacterized protein; Dihydrolipoyl dehydrogenase; Belongs to the class-I pyridine nucleotide-disulfide oxidoreductase family (570 aa)
PGSC0003DMT400036273	Solute carrier family 32 (vesicular inhibitory amino acid transporter); Uncharacterized protein; Amino acid transporter (444 aa)
PGSC0003DMT400027557	Serine carboxypeptidase-like clade i; Uncharacterized protein; 1-O-acylglucose:anthocyanin-O-acyltransferase; Belongs to the peptidase S10 family (477 aa)
PGSC0003DMT400065211	Uncharacterized loc102582737; Uncharacterized protein; Conserved gene of unknown function (190 aa)
PGSC0003DMT400026030	Solute carrier family 66 (lysosomal lysine-arginine transporter), member 1; Uncharacterized protein; Conserved gene of unknown function (395 aa)
PGSC0003DMT400081229	Nac domain-containing protein 73; NAC domain protein (293 aa)
PGSC0003DMT400056338	Tmv resistance protein n-like; Bacterial spot disease resistance protein 4; Belongs to the disease resistance NB-LRR family (1127 aa)
PGSC0003DMT400094217	Solute carrier family 36 (proton-coupled amino acid transporter); Uncharacterized protein; Amino acid transporter (422 aa)
PSK1	Putative phytosulfokines 6; Uncharacterized protein; Phytosulfokine peptide (95 aa)
PGSC0003DMT400010526	Probable alpha,alpha-trehalose-phosphate synthase [udp-forming] 9; Uncharacterized protein; Trehalose 6-phosphate synthase (919 aa)
PGSC0003DMT400017807	Uncharacterized loc102591380; Uncharacterized protein; Conserved gene of unknown function (104 aa)
PGSC0003DMT400031221	Protein DETOXIFICATION; Multidrug resistance pump; Belongs to the multi antimicrobial extrusion (MATE) (TC 2.A.66.1) family (486 aa)
PGSC0003DMT400080542	12-oxophytodienoate reductase 1-like; Uncharacterized protein; 12-oxophytodienoate reductase 1 (113 aa)
PGSC0003DMT400063501	Protein indeterminate-domain 12-like; Uncharacterized protein; ATIDD4-DOMAIN 4 (360 aa)
Cryptochrome-1-like	Uncharacterized protein; Cryptochrome 1b (583 aa)
PGSC0003DMT400029257	Transcription factor myb, plant; Uncharacterized protein; MYB transcription factor (313 aa)
PGSC0003DMT400008267	Uncharacterized protein; Lysosomal pro-X carboxypeptidase (498 aa)
PGSC0003DMT400023145	Probable uridine nucleosidase 1; Uncharacterized protein; Inosine-uridine preferring nucleoside hydrolase (334 aa)
PGSC0003DMT400000536	Ferric reduction oxidase 2-like; Uncharacterized protein; Ferric-chelate reductase (721 aa)
PGSC0003DMT400055931	Oxygen-evolving enhancer protein 3-2, chloroplastic; Photosystem II oxygen-evolving complex protein 3 (230 aa)
PGSC0003DMT400077751	Trihelix transcription factor gt-3b-like; Uncharacterized protein; Transcription factor (298 aa)
PGSC0003DMT400030028	Disease resistance protein rph8a-like; EDNR2GH4 protein; Belongs to the disease resistance NB-LRR family (500 aa)
PGSC0003DMT400014565	Peptidyl-prolyl cis-trans isomerase cyp26-2, chloroplastic; Uncharacterized protein; Peptidyl-prolyl cis-trans isomerase B, ppib (314 aa)
PGSC0003DMT400071510	Uncharacterized protein; Aquaporin NIP1.1; Belongs to the MIP/aquaporin (TC 1.A.8) family (277 aa)
PGSC0003DMT400060698	Serine/threonine-protein kinase ht1-like; Serine/threonine-protein kinase HT1 (340 aa)
Rrp1	Uncharacterized protein; KiTH-2 (212 aa)
PGSC0003DMT400071329	Protein kinase apk1a, chloroplastic; Protein kinase APK1B, chloroplast; Belongs to the protein kinase superfamily (394 aa)
PGSC0003DMT400017948	Putative e3 ubiquitin-protein ligase ring1a; Zinc finger family protein (394 aa)
PGSC0003DMT400072862	Uncharacterized loc102586280; Uncharacterized protein; Conserved gene of unknown function (283 aa)
PGSC0003DMT400069578	Mitochondrial import inner membrane translocase subunit tim14-3-like; DNAJ protein (109 aa)
PGSC0003DMT400073684	Uncharacterized protein; DNA photolyase (539 aa)
PGSC0003DMT400018279	Protein trichome birefringence-like 41; Uncharacterized protein; Conserved gene of unknown function (363 aa)
PGSC0003DMT400074514	Uncharacterized protein; Corticosteroid 11-beta-dehydrogenase; Belongs to the short-chain dehydrogenases/reductases (SDR) family (353 aa)
PGSC0003DMT400028805	Uncharacterized loc102583453; Uncharacterized protein; Conserved gene of unknown function (256 aa)
PGSC0003DMT400038827	Microtubule-associated protein 70-5-like; Uncharacterized protein; Myosin heavy chain, clone (505 aa)
PGSC0003DMT400026549	Uncharacterized protein; GDSL esterase/lipase; Belongs to the 'GDSL' lipolytic enzyme family (400 aa)
PGSC0003DMT400073451	Methyl-cpg-binding domain-containing protein 11-like; Nucleosome-binding protein (353 aa)
PGSC0003DMT400023282	Uncharacterized protein; Gene of unknown function; Belongs to the ubiquitin-conjugating enzyme family (284 aa)
PGSC0003DMT400000467	At-hook motif nuclear-localized protein 9; DNA binding protein (339 aa)
PGSC0003DMT400025715	Light-harvesting complex ii chlorophyll a/b binding protein 7; Chlorophyll a-b binding protein, chloroplastic; The light-harvesting complex (LHC) functions as a light receptor, it captures and delivers excitation energy to photosystems with which it is closely associated (318 aa)
PGSC0003DMT400060137	Uncharacterized loc102584825; Uncharacterized protein; Conserved gene of unknown function (70 aa)
PGSC0003DMT400049795	Heat shock transcription factor, other eukaryote; DNA binding protein (360 aa)
PGSC0003DMT400068515	Uncharacterized protein; Gamma-interferon-inducible lysosomal thiol reductase (230 aa)
PGSC0003DMT400077544	Cation/h(+) antiporter 15-like; Uncharacterized protein; Na(+)/H(+) antiporter (832 aa)
PGSC0003DMT400058335	Ring finger and chy zinc finger domain-containing protein 1; Zinc finger family protein (267 aa)
PGSC0003DMT400008278	S-norcoclaurine synthase 2-like; Uncharacterized protein; Conserved gene of unknown function (157 aa)
PGSC0003DMT400042677	Uncharacterized protein; RNase H family protein (326 aa)
PGSC0003DMT400058261	Uncharacterized loc102591705; Uncharacterized protein; Conserved gene of unknown function (519 aa)
PGSC0003DMT400093936	Calcium-transporting ATPase; This magnesium-dependent enzyme catalyzes the hydrolysis of ATP coupled with the transport of calcium (1233 aa)
LOX2.1	Linoleate 13s-lipoxygenase 2-1, chloroplastic-like; Linoleate 13S-lipoxygenase 2-1, chloroplastic; Plant lipoxygenase involved in a number of diverse aspects of plant physiology including growth and development, pest resistance, and senescence. May not be involved in the bulk production of jasmonate upon wounding. Catalyzes the hydroperoxidation of lipids containing a cis,cis-1,4-pentadiene struc…
PGSC0003DMT400006472	Uncharacterized protein in leu2 3'region-like; Uncharacterized protein; Conserved gene of unknown function (183 aa)
PGSC0003DMT400057463	Gdsl esterase/lipase at5g55050-like; Zinc finger protein; Belongs to the 'GDSL' lipolytic enzyme family (357 aa)
PGSC0003DMT400062877	Gibberellin-regulated protein 10-like; Uncharacterized protein; Gonadotropin beta chain (143 aa)
PGSC0003DMT400077598	Caffeoylshikimate esterase-like; Esterase/lipase/thioesterase family protein (319 aa)
PGSC0003DMT400045482	Uncharacterized loc102599958; Zinc knuckle (CCHC-type) family protein (391 aa)
PGSC0003DMT400077712	Auxin-responsive protein saur32-like; SAUR family protein (122 aa)
PGSC0003DMT400049448	Uncharacterized protein; DELLA protein GAI; Belongs to the GRAS family (510 aa)
PGSC0003DMT400048472	Uncharacterized loc107059711; Integrase core domain containing protein (405 aa)
PGSC0003DMT400096702	Uncharacterized protein; Ubiquitin (381 aa)
PGSC0003DMT400070666	Uncharacterized protein; Serine-threonine protein kinase, plant-type (466 aa)
PGSC0003DMT400079833	Translation initiation factor if-2, chloroplastic; Uncharacterized protein; Translation initiation factor IF-2 (1007 aa)
PGSC0003DMT400062354	Protein nrt1/ ptr family 5.6-like; Uncharacterized protein; Peptide transporter (590 aa)
PGSC0003DMT400025684	Peptidyl-prolyl cis-trans isomerase fkbp18, chloroplastic; Peptidylprolyl isomerase; FK506 binding protein (219 aa)
PGSC0003DMT400030930	Rhodanese-like domain-containing protein 9, chloroplastic; Rhodanese-like family protein (231 aa)
PGSC0003DMT400063262	Uncharacterized loc102586577; Ubiquitin-protein ligase (419 aa)
PGSC0003DMT400040125	Putative leucine-rich repeat receptor-like protein kinase at2g19210; Serine-threonine protein kinase, plant-type (590 aa)
PGSC0003DMT400010574	Uncharacterized loc102584308; Uncharacterized protein; Conserved gene of unknown function (401 aa)
PGSC0003DMT400036893	Chaperone protein clpd, chloroplastic; ERD1 protein, chloroplast; Belongs to the ClpA/ClpB family (965 aa)
PGSC0003DMT400000320	Uncharacterized protein; Eukaryotic translation initiation factor 3 subunit (748 aa)
PGSC0003DMT400027281	Uncharacterized loc102606317; Uncharacterized protein; Conserved gene of unknown function (290 aa)
PGSC0003DMT400006398	Transmembrane 9 superfamily member; Endosomal P24A protein; Belongs to the nonaspanin (TM9SF) (TC 9.A.2) family (636 aa)
PGSC0003DMT400066299	Uncharacterized loc102592216; Uncharacterized protein; Conserved gene of unknown function (256 aa)
RBCS-2C	Ribulose bisphosphate carboxylase small chain 2C, chloroplastic; RuBisCO catalyzes two reactions: the carboxylation of D- ribulose 1,5-bisphosphate, the primary event in carbon dioxide fixation, as well as the oxidative fragmentation of the pentose substrate. Both reactions occur simultaneously and in competition at the same active site (By similarity) (180 aa)
PGSC0003DMT400060940	F-box/kelch-repeat protein at1g15670-like; F-box family protein (343 aa)
PGSC0003DMT400056077	Uncharacterized protein; Gene of unknown function (207 aa)
PGSC0003DMT400083292	Replication protein a 70 kda dna-binding subunit b-like; Replication factor A protein (152 aa)
PGSC0003DMT400050067	Uncharacterized protein; Annexin 11 (316 aa)
PGSC0003DMT400070323	Glucomannan 4-beta-mannosyltransferase 9-like; Uncharacterized protein; Cellulose synthase-like A1 (530 aa)
Expansin-B3-like	Uncharacterized protein; Beta-expansin 3; Belongs to the expansin family (262 aa)
PGSC0003DMT400042032	Uncharacterized protein; Class IV chitinase (285 aa)
PGSC0003DMT400013627	Auxin-responsive protein iaa16-like; Auxin-responsive protein; Aux/IAA proteins are short-lived transcriptional factors that function as repressors of early auxin response genes at low auxin concentrations (214 aa)
PGSC0003DMT400054276	Uncharacterized protein; Conserved gene of unknown function; Belongs to the cytochrome P450 family (234 aa)
PGSC0003DMT400069276	Tartrate-resistant acid phosphatase type 5 (333 aa)
PGSC0003DMT400051584	Terpene cyclase/mutase family member; Beta-amyrin synthase; Belongs to the terpene cyclase/mutase family (761 aa)
PGSC0003DMT400045472	Uncharacterized protein; Conserved gene of unknown function (503 aa)
PGSC0003DMT400030841	Mfs transporter, sp family, sugar:h+ symporter; Uncharacterized protein; Conserved gene of unknown function; Belongs to the major facilitator superfamily. Sugar transporter (TC 2.A.1.1) family (489 aa)
PGSC0003DMT400007608	Putative receptor-like protein kinase at3g47110; Disease resistance protein (852 aa)
PGSC0003DMT400042918	Endoribonuclease dicer homolog 2-like; ATP binding protein (1104 aa)
PGSC0003DMT400046647	Ferric reduction oxidase 8, mitochondrial; Uncharacterized protein; ATFRO8/FRO8 (699 aa)
PGSC0003DMT400073281	Probable lrr receptor-like serine/threonine-protein kinase at3g47570; Uncharacterized protein; Conserved gene of unknown function; Belongs to the protein kinase superfamily. Ser/Thr protein kinase family (1160 aa)
PGSC0003DMT400009920	Uncharacterized protein; Farnesylated protein (367 aa)
PGSC0003DMT400004383	Uncharacterized protein; Conserved gene of unknown function (85 aa)
PGSC0003DMT400052577	Uncharacterized loc102588703; Uncharacterized protein; Conserved gene of unknown function (219 aa)
PGSC0003DMT400019490	Photosystem II reaction center W protein, chloroplastic (132 aa)
PGSC0003DMT400040864	Uncharacterized loc102606329; Uncharacterized protein; Conserved gene of unknown function (221 aa)
PGSC0003DMT400033866	Btb/poz domain-containing protein at5g67385-like; Protein binding / signal transducer; Belongs to the NPH3 family (601 aa)
PGSC0003DMT400044831	Uncharacterized protein; Mutt domain protein (271 aa)
PGSC0003DMT400070732	Protein nrt1/ ptr family 6.2-like; Uncharacterized protein; Oligopeptide transporter (575 aa)
PGSC0003DMT400039786	Transcription factor tcp4-like; Uncharacterized protein; SlTCP3 (421 aa)
PGSC0003DMT400029080	Pectinesterase inhibitor-like; Uncharacterized protein; Pectinesterase inhibitor (168 aa)
PGSC0003DMT400078282	B3 domain-containing transcription repressor VAL1-like; Uncharacterized protein; Transcription factor (401 aa)
PGSC0003DMT400060935	Uncharacterized loc102601839; Uncharacterized protein; Conserved gene of unknown function (252 aa)
PGSC0003DMT400002549	Lob domain-containing protein 6-like; LOB domain-containing protein 6 (189 aa)
PGSC0003DMT400020122	Xyloglucan endotransglucosylase/hydrolase; Catalyzes xyloglucan endohydrolysis (XEH) and/or endotransglycosylation (XET). Cleaves and religates xyloglucan polymers, an essential constituent of the primary cell wall, and thereby participates in cell wall construction of growing tissues; Belongs to the glycosyl hydrolase 16 family (290 aa)
PGSC0003DMT400063962	2-oxoisovalerate dehydrogenase subunit alpha 1, mitochondrial-like; Uncharacterized protein; Branched chain alpha-keto acid dehydrogenase E1-alpha subunit (471 aa)
PGSC0003DMT400063491	Dnaj homolog subfamily c member 5 homolog; Pentatricopeptide repeat-containing protein (271 aa)
PGSC0003DMT400020675	Thioredoxin-like 4, chloroplastic; Uncharacterized protein; Thioredoxin (215 aa)
PGSC0003DMT400022600	Transcription factor myb108-like; Uncharacterized protein; R2R3 transcription factor MYB108 1 (297 aa)
PGSC0003DMT400000078	Uncharacterized protein; Carbonyl reductase; Belongs to the short-chain dehydrogenases/reductases (SDR) family (300 aa)
Dimethylallylcistransferase	Alkyl transferase; Neryl diphosphate synthase 1; Belongs to the UPP synthase family (291 aa)
PGSC0003DMT400041382	Monothiol glutaredoxin-s1-like; Uncharacterized protein; Glutaredoxin (102 aa)
PGSC0003DMT400041664	Putative web family protein at1g65010, chloroplastic; Uncharacterized protein; Conserved gene of unknown function (576 aa)
PGSC0003DMT400076244	Uncharacterized protein; Glycine-rich protein like (138 aa)
PGSC0003DMT400062883	Calmodulin-binding protein 60 b-like; Calmodulin binding protein (369 aa)
PGSC0003DMT400050229	Thioredoxin-like 1-2, chloroplastic; Uncharacterized protein; Thioredoxin II (248 aa)
PGSC0003DMT400036091	Clathrin coat assembly protein AP180 (726 aa)
PGSC0003DMT400020890	Cytokinin riboside 5'-monophosphate phosphoribohydrolase; Cytokinin-activating enzyme working in the direct activation pathway. Phosphoribohydrolase that converts inactive cytokinin nucleotides to the biologically active free-base forms (228 aa)
PGSC0003DMT400025952	3-ketodihydrosphingosine reductase; Uncharacterized protein; Short-chain dehydrogenase (262 aa)
PGSC0003DMT400069757	Uncharacterized loc102586406; Binding protein (447 aa)
PGSC0003DMT400038571	Random slug protein 5-like; Uncharacterized protein; Transporter (268 aa)
PGSC0003DMT400034994	Uncharacterized loc102591374; Ran GTPase binding protein (1035 aa)
PGSC0003DMT400009070	Late embryogenesis abundant protein-like; Dhn1 protein; Belongs to the plant dehydrin family (157 aa)
PGSC0003DMT400077720	Putative disease resistance rpp13-like protein 1; CC-NBS-LRR protein; Belongs to the disease resistance NB-LRR family (1118 aa)
PGSC0003DMT400066723	Uncharacterized loc102591329; Uncharacterized protein; Conserved gene of unknown function (202 aa)
PGSC0003DMT400056491	Uncharacterized loc107063505; Uncharacterized protein; Tn7 reverse transcriptase (276 aa)
PGSC0003DMT400027950	Monothiol glutaredoxin-s1-like; Uncharacterized protein; Glutaredoxin (102 aa)
PGSC0003DMT400014719	WAT1-related protein At3g18200; WAT1-related protein; Nodulin (359 aa)
PGSC0003DMT400014913	Protein lurp-one-related 4-like; GTP binding protein (208 aa)
PGSC0003DMT400051635	Ent-copalyl diphosphate synthase, chloroplastic-like; Uncharacterized protein; Copalyl diphosphate synthase; Belongs to the terpene synthase family (702 aa)
PGSC0003DMT400002145	Piriformospora indica-insensitive protein 2; Serine-threonine protein kinase, plant-type (467 aa)
PGSC0003DMT400066550	Receptor protein kinase-like protein at4g34220; Uncharacterized protein; Interleukin-1 receptor-associated kinase (303 aa)
PGSC0003DMT400004117	Uncharacterized loc102587102; Uncharacterized protein; Conserved gene of unknown function (317 aa)
PGSC0003DMT400076444	Uncharacterized loc102588456; DNA binding protein (124 aa)
PGSC0003DMT400036055	G-type lectin s-receptor-like serine/threonine-protein kinase at1g11300; Belongs to the protein kinase superfamily. Ser/Thr protein kinase family (767 aa)
PGSC0003DMT400003274	Signal recognition particle 43 kda protein, chloroplastic; Ankyrin repeat domain protein (372 aa)
PGSC0003DMT400034555	Solute carrier family 13 (sodium-dependent dicarboxylate transporter), member 2/3/5; Uncharacterized protein; Tonoplast dicarboxylate transporter (496 aa)
PGSC0003DMT400029153	Serine carboxypeptidase-like clade ii; Serine carboxypeptidase; Belongs to the peptidase S10 family (465 aa)
PGSC0003DMT400000539	Uncharacterized loc102581576; Uncharacterized protein; Conserved gene of unknown function (249 aa)
PGSC0003DMT400019772	Cytochrome p450 750a1-like; Uncharacterized protein; Cytochrome P450 monooxygenase CYP736B (132 aa)
PGSC0003DMT400040054	Bzip transcription factor 53-like; Uncharacterized protein; BZIP transcription factor BZI-2 (132 aa)
PGSC0003DMT400066312	B3 domain-containing protein At5g42700-like; Uncharacterized protein; Conserved gene of unknown function (295 aa)
PGSC0003DMT400014383	Transcription factor myb, plant; Uncharacterized protein; MYB (278 aa)
PGSC0003DMT400062184	Putative late blight resistance protein homolog r1b-16; Disease resistance protein BS2; Belongs to the disease resistance NB-LRR family (868 aa)
PGSC0003DMT400056693	Uncharacterized protein; Polyprotein (229 aa)
PGSC0003DMT400079357	Probable galactinol--sucrose galactosyltransferase 6; Uncharacterized protein; Hydrolase, hydrolyzing O-glycosyl compounds (864 aa)
PGSC0003DMT400011811	Photosystem II 5 kDa protein, chloroplastic (112 aa)
PGSC0003DMT400037957	Uncharacterized loc102582218; Uncharacterized protein; Conserved gene of unknown function (293 aa)
PGSC0003DMT400015377	Transcription factor pif5-like; Uncharacterized protein; Helix-loop-helix DNA-binding domain containing protein (203 aa)
PGSC0003DMT400076481	Nac transcription factor 25; NAC domain-containing protein (195 aa)
PGSC0003DMT400054501	Putative e3 ubiquitin-protein ligase lin; Uncharacterized protein; Transducin (1022 aa)
PGSC0003DMT400009709	F-box/kelch-repeat protein at3g23880-like; F-Box protein (378 aa)
PGSC0003DMT400070963	Uncharacterized protein; Alpha-hydroxynitrile lyase (275 aa)
PGSC0003DMT400025786	Uncharacterized protein at1g76070-like; Syringolide-induced protein 14-1-1 (249 aa)
PGSC0003DMT400076791	Solute carrier family 32 (vesicular inhibitory amino acid transporter); Uncharacterized protein; Amino acid transporter (420 aa)
PGSC0003DMT400022023	Ethylene-responsive transcription factor rap2-13; Dehydration-responsive element binding protein 3 (339 aa)
PGSC0003DMT400025180	Probable s-adenosylmethionine-dependent methyltransferase at5g38780; Uncharacterized protein; Conserved gene of unknown function (295 aa)
PGSC0003DMT400064739	Uncharacterized protein at5g39570-like; Uncharacterized protein; Pro-resilin (341 aa)
PGSC0003DMT400018554	Photosystem II core complex proteins psbY, chloroplast (195 aa)
PGSC0003DMT400015429	Probable receptor-like protein kinase at1g11050; Uncharacterized protein; Kinase (615 aa)
Beta-galactosidase	Beta-galactosidase (838 aa)
PGSC0003DMT400078463	Chaperone protein dnaj-like; Heat shock protein binding protein (188 aa)
PGSC0003DMT400010195	Citrate-binding protein-like; Citrate binding protein (218 aa)
PGSC0003DMT400081912	Probable 2-oxoglutarate-dependent dioxygenase aop1.2; Uncharacterized protein; Oxidoreductase, 2OG-Fe(II) oxygenase family protein; Belongs to the iron/ascorbate-dependent oxidoreductase family (329 aa)
PGSC0003DMT400050663	Elongation factor 1-alpha-like; Elongation factor 1-alpha; This protein promotes the GTP-dependent binding of aminoacyl-tRNA to the A-site of ribosomes during protein biosynthesis (447 aa)
PGSC0003DMT400052998	Cbl-interacting serine/threonine-protein kinase 11-like; Non-specific serine/threonine protein kinase; Avr9/Cf-9 rapidly elicited protein 216 (446 aa)
PGSC0003DMT400040107	Protein shi related sequence 1-like; Uncharacterized protein; Short internodes 2 (346 aa)
PGSC0003DMT400015675	Uncharacterized protein; F-box protein SNE (164 aa)
PGSC0003DMT400072423	Carotene epsilon-monooxygenase, chloroplastic; Belongs to the cytochrome P450 family (551 aa)
BBX4	Zinc finger protein constans-like 4-like; B-box zinc finger protein 4; CONSTANS (357 aa)
PGSC0003DMT400061303	Uncharacterized protein; Hcr2-0B (945 aa)
PGSC0003DMT400046599	Protein shoot gravitropism 5; Nucleic acid binding protein (169 aa)
PGSC0003DMT400001376	Zinc finger an1 domain-containing stress-associated protein 12; Stress-associated protein 11 (187 aa)
PGSC0003DMT400007200	B3 domain-containing transcription factor VRN1-like; Uncharacterized protein; Sulfotransferase (328 aa)
PGSC0003DMT400067987	Non-functional pseudokinase zed1-like; Serine-threonine protein kinase, plant-type (355 aa)
PGSC0003DMT400000425	Uncharacterized protein; Cytochrome P450 monooxygenase (392 aa)
SHMT	Serine hydroxymethyltransferase, mitochondrial; Catalyzes the interconversion of serine and glycine; Belongs to the SHMT family (518 aa)
PGSC0003DMT400069666	Serine/threonine protein phosphatase 2a 55 kda regulatory subunit b beta isoform-like; Protein phosphatase pp2a regulatory subunit B (494 aa)
PGSC0003DMT400059667	Secoisolariciresinol dehydrogenase-like; Uncharacterized protein; Short chain alcohol dehydrogenase (288 aa)
GA3ox2	Uncharacterized protein; Gibberellin 3-oxidase; Belongs to the iron/ascorbate-dependent oxidoreductase family (356 aa)
PGSC0003DMT400079649	2-alkenal reductase (NADP(+)-dependent)-like; Uncharacterized protein; Allyl alcohol dehydrogenase (343 aa)
PGSC0003DMT400002509	Adenylate dimethylallyltransferase (cytokinin synthase); ATP binding protein (319 aa)
PGSC0003DMT400046967	Agamous-like mads-box protein agl80; Uncharacterized protein; Type I MADS box transcription factor (64 aa)
PGSC0003DMT400028658	Abscisic acid receptor pyr/pyl family; Uncharacterized protein; Abscisic acid receptor PYL4 (213 aa)
psaD	Photosystem i reaction center subunit ii, chloroplastic; Photosystem I reaction centre PSI-D subunit (207 aa)
PGSC0003DMT400002125	AP2/ERF and B3 domain-containing transcription factor RAV1; Uncharacterized protein; RAV transcription factor (398 aa)
PGSC0003DMT400045391	Putative abc transport system permease protein; Protein ALUMINUM SENSITIVE 3 (264 aa)
DREB2	Ethylene-responsive transcription factor erf010-like; DRE binding protein 1 (145 aa)
PGSC0003DMT400039491	Cbs domain-containing protein cbscbspb5-like; CBS domain containing protein (551 aa)
PGSC0003DMT400009999	Guard cell s-type anion channel slac1; Tellurite resistance protein tehA (560 aa)
PGSC0003DMT400031288	Probable lrr receptor-like serine/threonine-protein kinase at4g08850; LRR receptor-like serine/threonine-protein kinase (1009 aa)
PGSC0003DMT400067456	Uncharacterized protein; Major pollen allergen Ory s 1; Belongs to the expansin family (253 aa)
PGSC0003DMT400059019	Putative inactive methylesterase 20; Uncharacterized protein; Methylesterase (206 aa)
PGSC0003DMT400045658	Probable lrr receptor-like serine/threonine-protein kinase at4g08850; LRR receptor-like serine/threonine-protein kinase (1037 aa)
PGSC0003DMT400028619	Uncharacterized protein; Glutathione-S-transferase; Belongs to the GST superfamily (221 aa)
PGSC0003DMT400044107	Protein nuclear fusion defective 4-like; Nodulin family protein (544 aa)
PGSC0003DMT400043468	Uncharacterized loc107061046; Uncharacterized protein; Conserved gene of unknown function (149 aa)
PGSC0003DMT400048245	Casp-like protein 2c1; UPF0497 membrane protein 13; Belongs to the Casparian strip membrane proteins (CASP) family (200 aa)
PGSC0003DMT400013514	Nifu-like protein 3, chloroplastic; Nitrogen fixation protein nifU (254 aa)
PGSC0003DMT400057543	Solute carrier family 29 (equilibrative nucleoside transporter), member 1/2/3; Uncharacterized protein; Equilibrative nucleoside transporter (351 aa)
PGSC0003DMT400074183	Probable transcription factor kan4; Uncharacterized protein; Myb-like DNA-binding domain, SHAQKYF class family protein (158 aa)
PGSC0003DMT400045362	Udp-glycosyltransferase 73c3-like; Uncharacterized protein; Flavonoid glucoyltransferase UGT73E2 (491 aa)
PGSC0003DMT400013766	Transcription factor bee 1-like; Basic helix-loop-helix protein BHLH5 (272 aa)
PGSC0003DMT400043125	Butyrate--coa ligase aae11, peroxisomal-like; Uncharacterized protein; Acyl:coa ligase acetate-coa synthetase (575 aa)
PGSC0003DMT400049037	Intermediate filament protein ifa-3; Uncharacterized protein; Conserved gene of unknown function (348 aa)
PGSC0003DMT400000899	Beta-galactosidase-like; Beta-galactosidase (670 aa)
PGSC0003DMT400030999	Non-functional pseudokinase zed1-like; Serine-threonine protein kinase, plant-type (381 aa)
PGSC0003DMT400080118	Purple acid phosphatase 23-like; Purple acid phosphatase; Nucleotide pyrophosphatase/phosphodiesterase (555 aa)
PGSC0003DMT400055237	Pentatricopeptide repeat-containing protein at5g67570, chloroplastic; GTP binding protein (864 aa)
PGSC0003DMT400000866	Uncharacterized loc102595674; Ultraviolet-B-repressible protein (120 aa)
PGSC0003DMT400007341	Nac transcription factor 29-like; NAC domain protein NAC2 (283 aa)
PGSC0003DMT400081388	Probable pectinesterase/pectinesterase inhibitor 41; In the C-terminal section; belongs to the pectinesterase family (566 aa)
PGSC0003DMT400053851	Probable receptor-like protein kinase at1g67000; Uncharacterized protein; Kinase (147 aa)
PGSC0003DMT400035266	Uncharacterized protein; BI1; Belongs to the BI1 family (242 aa)
PGSC0003DMT400067466	Uncharacterized protein; Methylglutaconyl-CoA hydratase, mitochondrial; Belongs to the enoyl-CoA hydratase/isomerase family (311 aa)
PGSC0003DMT400017668	Cycloartenol-C-24-methyltransferase 1; Methyltransferase; S-adenosyl-methionine-sterol-C-methyltransferase; Belongs to the class I-like SAM-binding methyltransferase superfamily. Erg6/SMT family (346 aa)
PGSC0003DMT400003898	Uncharacterized loc102604668; Uncharacterized protein; Conserved gene of unknown function (275 aa)
PGSC0003DMT400078351	Uncharacterized protein at1g66480-like; Uncharacterized protein; Conserved gene of unknown function (236 aa)
PGSC0003DMT400005990	Protein strictosidine synthase-like 4-like; Adipocyte plasma membrane-associated protein (289 aa)
PGSC0003DMT400060082	Uncharacterized loc102600238; Uncharacterized protein; Conserved gene of unknown function (210 aa)
PGSC0003DMT400019166	Pentatricopeptide repeat-containing protein at2g27610; Pentatricopeptide repeat-containing protein (871 aa)
PGSC0003DMT400030288	7-hydroxymethyl chlorophyll a reductase, chloroplastic; Uncharacterized protein; Coenzyme F420 hydrogenase family (146 aa)
PGSC0003DMT400047537	Uncharacterized protein; ABA 8'-hydroxylase CYP707A1; Belongs to the cytochrome P450 family (469 aa)
PGSC0003DMT400082049	Transmembrane protein 45a-like; Uncharacterized protein; Conserved gene of unknown function (317 aa)
PGSC0003DMT400041080	Abscisic acid receptor pyr/pyl family; Uncharacterized protein; Abscisic acid receptor PYL4 (207 aa)
PGSC0003DMT400029420	Bifunctional epoxide hydrolase 2-like; Uncharacterized protein; Epoxide hydrolase 1 (334 aa)
Sedoheptulose-1,7-bisphosphatase	Sedoheptulose-1,7-bisphosphatase, chloroplastic; Uncharacterized protein; Chloroplast sedoheptulose-1,7-bisphosphatase (395 aa)
PGSC0003DMT400061003	Glycosyltransferase; Zeatin O-glucosyltransferase; Belongs to the UDP-glycosyltransferase family (471 aa)
PGSC0003DMT400011705	Diacylglycerol o-acyltransferase 3, plant; Uncharacterized protein; Soluble diacylglycerol acyltransferase (413 aa)
PGSC0003DMT400044706	Uncharacterized protein; PDF (253 aa)
PGSC0003DMT400071885	Probable lrr receptor-like serine/threonine-protein kinase at4g08850; Uncharacterized protein; Conserved gene of unknown function (1283 aa)
PGSC0003DMT400080937	Glycine-rich cell wall structural protein-like; Glycine-rich protein (135 aa)
PGSC0003DMT400001995	Salicylic acid-binding protein 2-like; Salicylic acid-binding protein 2 (264 aa)
PGSC0003DMT400017259	Uncharacterized protein; Cyclic nucleotide-gated ion channel 15 (710 aa)
BBX7	Zinc finger protein constans-like 10; B-box zinc finger protein 7; Transcription factor (411 aa)
PGSC0003DMT400009991	Uncharacterized protein; Belongs to the peptidase S8 family (743 aa)
PGSC0003DMT400009428	Uncharacterized loc102578369; Uncharacterized protein; Conserved gene of unknown function (167 aa)
PGSC0003DMT400012888	Abscisic acid receptor pyr/pyl family; Pathogenesis-induced protein (177 aa)
PGSC0003DMT400021653	Uncharacterized loc102592272; Uncharacterized protein; Transcription factor (500 aa)
PGSC0003DMT400002011	Lob domain-containing protein 36-like; Uncharacterized protein; Asymmetric leaves 2 (288 aa)
PGSC0003DMT400069120	Basic proline-rich protein-like; Uncharacterized protein; GI11736 (439 aa)
PGSC0003DMT400016179	Uncharacterized loc102580796; CHP-rich zinc finger protein (397 aa)
PGSC0003DMT400064695	Cyclic dof factor 3-like; Zinc finger protein (465 aa)
PGSC0003DMT400049549	Uncharacterized protein; Cytoplasmic dynein light chain (121 aa)
PGSC0003DMT400047499	Uncharacterized protein; Resistance gene; Belongs to the disease resistance NB-LRR family (1169 aa)
PGSC0003DMT400001688	Metallothiol transferase fosb; Uncharacterized protein; Lactoylglutathione lyase (178 aa)
PGSC0003DMT400000597	Solute carrier family 25 (mitochondrial phosphate transporter), member 23/24/25/41; Uncharacterized protein; Mitochondrial carrier; Belongs to the mitochondrial carrier (TC 2.A.29) family (355 aa)
PGSC0003DMT400054391	Uncharacterized protein; Reticuline oxidase; Belongs to the oxygen-dependent FAD-linked oxidoreductase family (431 aa)
PGSC0003DMT400055165	Uncharacterized loc102596300; Uncharacterized protein; Conserved gene of unknown function (114 aa)
PGSC0003DMT400021871	Light-harvesting complex ii chlorophyll a/b binding protein 4; Chlorophyll a-b binding protein, chloroplastic; The light-harvesting complex (LHC) functions as a light receptor, it captures and delivers excitation energy to photosystems with which it is closely associated (285 aa)
PGSC0003DMT400018789	Uncharacterized loc102603204; Uncharacterized protein; Conserved gene of unknown function (286 aa)
PGSC0003DMT400026153	Myosin heavy chain kinase b-like; F-box and wd40 domain protein (460 aa)
PGSC0003DMT400053643	Cytochrome p450 71d11-like; Belongs to the cytochrome P450 family (500 aa)
PGSC0003DMT400084231	Universal stress protein family protein (179 aa)
PGSC0003DMT400034899	Light-harvesting complex ii chlorophyll a/b binding protein 1; Chlorophyll a-b binding protein, chloroplastic; The light-harvesting complex (LHC) functions as a light receptor, it captures and delivers excitation energy to photosystems with which it is closely associated (267 aa)
Acanthoscurrin-1-like	Uncharacterized protein; Glycine-rich protein (122 aa)
PGSC0003DMT400044212	Probable protein kinase at2g41970; Protein kinase 1 (361 aa)
PGSC0003DMT400028767	Uncharacterized protein; Ribulose bisphosphate carboxylase/oxygenase activase 1, chloroplastic (438 aa)
PGSC0003DMT400029694	Uncharacterized protein; Thioredoxin-like 3-1, chloroplastic (214 aa)
PGSC0003DMT400065501	AP2-like ethylene-responsive transcription factor TOE3; PHAP2A protein (505 aa)
PGSC0003DMT400015563	Uncharacterized protein; CYP72A56 (517 aa)
PGSC0003DMT400009830	Uncharacterized protein; Sugar transporter; Belongs to the major facilitator superfamily. Sugar transporter (TC 2.A.1.1) family (480 aa)
PGSC0003DMT400058473	Uncharacterized protein at2g37660, chloroplastic; Uncharacterized protein; NAD dependent epimerase/dehydratase family protein (259 aa)
PGSC0003DMT400004186	Auxin-induced protein 15a-like; SAUR family protein (96 aa)
PGSC0003DMT400055959	Pathogen-inducible salicylic acid glucosyltransferase; Glycosyltransferase; UDP-glucosyltransferase 74F2; Belongs to the UDP-glycosyltransferase family (461 aa)
PGSC0003DMT400004090	Auxin-induced protein 15a-like; SAUR family protein (105 aa)
PGSC0003DMT400053854	Beta-d-glucosyl crocetin beta-1,6-glucosyltransferase-like; Glycosyltransferase; Glucosyl/glucuronosyl transferases; Belongs to the UDP-glycosyltransferase family (456 aa)
PGSC0003DMT400048261	Transcription factor myb, plant; Uncharacterized protein; MYB transcription factor MYB64 (368 aa)
RSI2	AT-hook motif nuclear-localized protein; Transcription factor that specifically binds AT-rich DNA sequences related to the nuclear matrix attachment regions (MARs) (268 aa)
PGSC0003DMT400057860	Uncharacterized n-acetyltransferase p20-like; Uncharacterized protein; N-acetyltransferase (171 aa)
PGSC0003DMT400063744	F-box protein pp2-b15-like; Uncharacterized protein; Conserved gene of unknown function (282 aa)
PGSC0003DMT400072666	Uncharacterized protein; Glutamate-ammonia ligase; Belongs to the glutamine synthetase family (847 aa)
PGSC0003DMT400010610	Protein iq-domain 1-like; SF16 protein (460 aa)
PGSC0003DMT400079498	Beta-galactosidase 3-like; Uncharacterized protein; Beta-galactosidase (727 aa)
PGSC0003DMT400029648	Probable e3 ubiquitin-protein ligase bah1-like 1; Ubiquitin-protein ligase (333 aa)
PGSC0003DMT400045148	Uncharacterized protein; Transcriptional regulator SUPERMAN (273 aa)
PGSC0003DMT400083071	Abc transporter a family member 7-like; Uncharacterized protein; Abc transporter (935 aa)
PGSC0003DMT400018927	Atp-binding cassette, subfamily c (cftr/mrp), member 2; Multidrug resistance protein ABC transporter family (1263 aa)
PGSC0003DMT400000626	Putative ring-h2 finger protein atl21a; RING-H2 finger protein ATL3K (372 aa)
PGSC0003DMT400039355	Cytochrome p450 71a2-like; Belongs to the cytochrome P450 family (497 aa)
PGSC0003DMT400051440	Pectin acetylesterase; Hydrolyzes acetyl esters in homogalacturonan regions of pectin. In type I primary cell wall, galacturonic acid residues of pectin can be acetylated at the O-2 and O-3 positions. Decreasing the degree of acetylation of pectin gels in vitro alters their physical properties (330 aa)
PGSC0003DMT400071154	Photosystem i reaction center subunit xi, chloroplastic; Uncharacterized protein; Photosystem I subunit XI (220 aa)
YABBY1	Uncharacterized protein; Axial regulator YABBY1 (219 aa)
PGSC0003DMT400024359	RING-H2 finger protein ATL73-like; Ring finger protein (183 aa)
PGSC0003DMT400058521	PGR5-like protein 1B, chloroplastic; Uncharacterized protein; PGR5 1A, chloroplastic (320 aa)
PGSC0003DMT400071281	Lob domain-containing protein 21-like; LOB domain-containing protein (177 aa)
PGSC0003DMT400034892	Chlorophyll a-b binding protein, chloroplastic; The light-harvesting complex (LHC) functions as a light receptor, it captures and delivers excitation energy to photosystems with which it is closely associated (262 aa)
PGSC0003DMT400016263	Uncharacterized protein; Flavonoid 3-hydroxylase; Belongs to the cytochrome P450 family (499 aa)
PGSC0003DMT400044133	Uncharacterized protein; Gag-pol polyprotein (481 aa)
PGSC0003DMT400069392	Btb/poz and taz domain-containing protein 1-like; BTB/POZ domain-containing protein (349 aa)
PGSC0003DMT400029280	Uncharacterized protein; Gibberellin 2-oxidase 1; Belongs to the iron/ascorbate-dependent oxidoreductase family (337 aa)
PGSC0003DMT400012721	Inositol-tetrakisphosphate 1-kinase; Kinase that can phosphorylate various inositol polyphosphate such as Ins(3,4,5,6)P4 or Ins(1,3,4)P3; Belongs to the ITPK1 family (337 aa)
PGSC0003DMT400069733	Dehydration-responsive element-binding protein 2a-like; AP2-domain DNA-binding protein (409 aa)
PGSC0003DMT400094259	Calcium-transporting atpase 12, plasma membrane-type-like; Calcium-transporting ATPase; This magnesium-dependent enzyme catalyzes the hydrolysis of ATP coupled with the transport of calcium (901 aa)
PGSC0003DMT400045176	Atp-binding cassette, subfamily b (mdr/tap), member 1; P-glycoprotein (1257 aa)
PGSC0003DMT400024250	At-hook motif nuclear-localized protein 17; AT-hook DNA-binding protein (269 aa)
PGSC0003DMT400089434	Farnesyl-diphosphate farnesyltransferase; Uncharacterized protein; Squalene synthase (382 aa)
PGSC0003DMT400039600	Protein spa1-related 4-like; Ubiquitin ligase protein cop1 (868 aa)
PGSC0003DMT400052217	Uncharacterized protein; Ribonucleoside-diphosphate reductase small chain (329 aa)
PGSC0003DMT400033127	Uncharacterized protein; Calmodulin binding protein SUN (405 aa)
PGSC0003DMT400059004	Uncharacterized loc102599255; Uncharacterized protein; Conserved gene of unknown function (173 aa)
PGSC0003DMT400081849	Uncharacterized loc102603751; Uncharacterized protein; Conserved gene of unknown function (405 aa)
PGSC0003DMT400089324	Pentatricopeptide repeat-containing protein at5g66520; Pentatricopeptide repeat-containing protein (527 aa)
PGSC0003DMT400020030	Zinc finger protein constans-like 16-like; Uncharacterized protein; Transcription factor (563 aa)
PGSC0003DMT400044594	Uncharacterized loc107060883; Metal ion binding protein (129 aa)
Tetraspanin-19-like	Uncharacterized protein; Conserved gene of unknown function; Belongs to the tetraspanin (TM4SF) family (216 aa)
PGSC0003DMT400011381	Light-harvesting complex i chlorophyll a/b binding protein 5; Chlorophyll a-b binding protein, chloroplastic; The light-harvesting complex (LHC) functions as a light receptor, it captures and delivers excitation energy to photosystems with which it is closely associated (266 aa)
PGSC0003DMT400001053	Uncharacterized loc102592232; Uncharacterized protein; Gene of unknown function (105 aa)
PGSC0003DMT400083871	Transmembrane 9 superfamily member; Endosomal P24A protein; Belongs to the nonaspanin (TM9SF) (TC 9.A.2) family (644 aa)
PGSC0003DMT400013894	Uncharacterized protein; Sterol desaturase; Belongs to the sterol desaturase family (626 aa)
PGSC0003DMT400041084	Nad(p)h-quinone oxidoreductase subunit l, chloroplastic; Uncharacterized protein; Conserved gene of unknown function (183 aa)
PGSC0003DMT400024594	Molecular chaperone htpg; Heat shock protein 83 (704 aa)
PGSC0003DMT400041083	Probable nad(p)h dehydrogenase subunit crr3, chloroplastic; Uncharacterized protein; Conserved gene of unknown function (146 aa)
PGSC0003DMT400026353	Protein DETOXIFICATION; Anthocyanin permease; Belongs to the multi antimicrobial extrusion (MATE) (TC 2.A.66.1) family (503 aa)
MSP	Oxygen-evolving enhancer protein 1, chloroplastic (329 aa)
PGSC0003DMT400052463	Uncharacterized protein; Fructose-1,6-bisphosphatase; Belongs to the FBPase class 1 family (408 aa)
PGSC0003DMT400044531	Protein strictosidine synthase-like 10-like; Uncharacterized protein; Strictosidine synthase (373 aa)
PGSC0003DMT400034873	Ethylene-responsive transcription factor 1b-like; Uncharacterized protein; Transcription factor TSRF1 (221 aa)
PGSC0003DMT400072921	Uncharacterized loc102605415; RNA binding protein (632 aa)
PGSC0003DMT400033425	Uncharacterized protein; Pirin; Belongs to the pirin family (293 aa)
PGSC0003DMT400055482	Uncharacterized loc102591579; Uncharacterized protein; Conserved gene of unknown function (160 aa)
PGSC0003DMT400023649	Uncharacterized loc102583814; Uncharacterized protein; Endonuclease (524 aa)
PGSC0003DMT400025543	Chaperone protein dnaj 11, chloroplastic-like; Uncharacterized protein; DNAJ (156 aa)
PGSC0003DMT400004947	WAT1-related protein At4g19185-like; Auxin-induced protein 5NG4 (382 aa)
Miraculin	Uncharacterized protein; Miraculin (205 aa)
PGSC0003DMT400045466	Protein nrt1/ ptr family 2.13; Uncharacterized protein; Nitrate transporter (606 aa)
PGSC0003DMT400018612	F-box protein at5g07610-like; F-box protein (260 aa)
PGSC0003DMT400073263	Probable alpha,alpha-trehalose-phosphate synthase [udp-forming] 7; Uncharacterized protein; Trehalose-6-phosphate synthase (850 aa)
PGSC0003DMT400067139	Uncharacterized protein; Conserved gene of unknown function (204 aa)
PGSC0003DMT400002019	Patatin-like protein 1; Patatin; Lipolytic acyl hydrolase (LAH) (420 aa)
PGSC0003DMT400021086	Uncharacterized loc102594895; Uncharacterized protein; Conserved gene of unknown function (400 aa)
PGSC0003DMT400079198	7-deoxyloganetin glucosyltransferase-like; Glycosyltransferase; Belongs to the UDP-glycosyltransferase family (491 aa)
PGSC0003DMT400026968	Homeobox-leucine zipper protein hat22-like; Uncharacterized protein; Homeodomain leucine-zipper 1 (254 aa)
PGSC0003DMT400040461	Jasmonate zim domain-containing protein; Pto-responsive gene 1 protein (228 aa)
PGSC0003DMT400070131	Serine carboxypeptidase-like clade ii; Serine carboxypeptidase-like 27; Belongs to the peptidase S10 family (456 aa)
PGSC0003DMT400062848	Probable myosin-binding protein 5; Uncharacterized protein; Conserved gene of unknown function (599 aa)
PGSC0003DMT400081515	Uncharacterized loc107059401; Uncharacterized protein; Gene of unknown function (65 aa)
PGSC0003DMT400057744	Quinone oxidoreductase pig3-like; Uncharacterized protein; NADPH quinone oxidoreductase (325 aa)
PGSC0003DMT400014656	Transcription factor bee 3; DNA binding protein (276 aa)
PGSC0003DMT400001965	Uncharacterized protein; Geraniol 10-hydroxylase; Belongs to the cytochrome P450 family (497 aa)
PGSC0003DMT400048740	Calcium-transporting atpase 12, plasma membrane-type-like; Calcium-transporting ATPase; This magnesium-dependent enzyme catalyzes the hydrolysis of ATP coupled with the transport of calcium (1028 aa)
PGSC0003DMT400015478	E3 ubiquitin-protein ligase ATL10/75/76/77/78; RING-H2 finger protein ATL1L (222 aa)
PGSC0003DMT400081287	Trans-resveratrol di-o-methyltransferase-like; Uncharacterized protein; O-methyltransferase; Belongs to the class I-like SAM-binding methyltransferase superfamily. Cation-independent O- methyltransferase family (357 aa)
PGSC0003DMT400003453	Transcription factor tcp17; Uncharacterized protein; Transcription factor (283 aa)
PGSC0003DMT400014188	3-ketoacyl-CoA synthase 20-like; 3-ketoacyl-CoA synthase; Acyltransferase (493 aa)
PGSC0003DMT400067082	Calcium-dependent protein kinase 11; Calcium-dependent protein kinase (501 aa)
PGSC0003DMT400036874	Serine/threonine-protein kinase osr1/stk39; ATP binding / kinase/ protein kinase/ protein serine/threonine kinase/ protein tyrosine kinase (671 aa)
PGSC0003DMT400011851	Alanine-glyoxylate transaminase / serine-glyoxylate transaminase / serine-pyruvate transaminase; Uncharacterized protein; Serine-pyruvate aminotransferase (401 aa)
PGSC0003DMT400083215	Uncharacterized protein; Basic 7S globulin 2 small subunit; Belongs to the peptidase A1 family (416 aa)
PGSC0003DMT400021096	Protein iq-domain 14-like; Calmodulin binding protein SUN (221 aa)
PGSC0003DMT400079777	Cysteine proteinase 15a; Cysteine proteinase; Belongs to the peptidase C1 family (386 aa)
PGSC0003DMT400040634	O-palmitoleoyl-l-serine hydrolase; Pectin acetylesterase; Hydrolyzes acetyl esters in homogalacturonan regions of pectin. In type I primary cell wall, galacturonic acid residues of pectin can be acetylated at the O-2 and O-3 positions. Decreasing the degree of acetylation of pectin gels in vitro alters their physical properties (402 aa)
PGSC0003DMT400025172	Diphosphoinositol-polyphosphate diphosphatase; Uncharacterized protein; Nudix hydrolase 17, mitochondrial (160 aa)
PGSC0003DMT400093666	Putative f-box/lrr-repeat protein at5g02930; F-box family protein (377 aa)
PGSC0003DMT400028641	Acyl-coenzyme a oxidase 4, peroxisomal-like; Uncharacterized protein; Acyl-CoA dehydrogenase (439 aa)
PGSC0003DMT400044668	G-type lectin s-receptor-like serine/threonine-protein kinase sd2-5; Belongs to the protein kinase superfamily. Ser/Thr protein kinase family (842 aa)
PGSC0003DMT400039470	Nuclear transcription factor y subunit c-1-like; CONSTANS interacting protein 2a (230 aa)
Ankyrin-1-like	Uncharacterized protein; Ankyrin (664 aa)
PGSC0003DMT400026505	Uncharacterized protein; Cysteine protease; Belongs to the peptidase C1 family (508 aa)
PGSC0003DMT400028991	Probable lrr receptor-like serine/threonine-protein kinase at4g30520; Serine/threonine protein kinase; Belongs to the protein kinase superfamily. Ser/Thr protein kinase family (631 aa)
PGSC0003DMT400066669	Salicylic acid-binding protein 2-like; Uncharacterized protein; Methylketone synthase Ib (288 aa)
PGSC0003DMT400068787	Probable lrr receptor-like serine/threonine-protein kinase at3g47570; Uncharacterized protein; Conserved gene of unknown function; Belongs to the protein kinase superfamily. Ser/Thr protein kinase family (1204 aa)
PGSC0003DMT400034446	Uncharacterized protein; Potassium channel TORK1 (828 aa)
CS-A	Cytosolic cysteine synthase (325 aa)
RCA	Uncharacterized protein; Ribulose bisphosphate carboxylase/oxygenase activase, chloroplastic (437 aa)
PGSC0003DMT400092826	Vacuolar protein sorting-associated protein ist1; Uncharacterized protein; Conserved gene of unknown function (425 aa)
PGSC0003DMT400077830	Probable serine/threonine-protein kinase wnk11; ATP binding protein (294 aa)
PGSC0003DMT400080290	Uncharacterized loc102604835; 60S ribosomal protein L34 (843 aa)
PGSC0003DMT400048730	Serine/threonine-protein kinase sty46-like; Protein kinase (562 aa)
PGSC0003DMT400046711	Cytochrome p450 71a4-like; Belongs to the cytochrome P450 family (500 aa)
PGSC0003DMT400037920	Universal stress protein family protein (161 aa)
PGSC0003DMT400040448	Transcription factor bhlh51-like; Uncharacterized protein; Transcription factor bHLH51 (225 aa)
PGSC0003DMT400006512	Large subunit ribosomal protein l37e; Ribosomal protein L37; Binds to the 23S rRNA (95 aa)
PGSC0003DMT400050399	Uncharacterized loc102582558; Uncharacterized protein; Neoxanthin synthase (226 aa)
PGSC0003DMT400009296	Salicylate carboxymethyltransferase; Uncharacterized protein; Jasmonate O-methyltransferase (368 aa)
PGSC0003DMT400075608	Glyceraldehyde-3-phosphate dehydrogenase (NADP+) (phosphorylating); Glyceraldehyde-3-phosphate dehydrogenase B subunit; Belongs to the glyceraldehyde-3-phosphate dehydrogenase family (450 aa)
PGSC0003DMT400010341	Mitogen-activated protein kinase kinase kinase npk1-like; ATP binding protein; Belongs to the protein kinase superfamily (356 aa)
PGSC0003DMT400032844	Uncharacterized loc102585982; Uncharacterized protein; Conserved gene of unknown function (150 aa)
PGSC0003DMT400032453	Uncharacterized protein; Conserved gene of unknown function; Belongs to the disease resistance NB-LRR family (614 aa)
PGSC0003DMT400026261	Kunitz-type trypsin inhibitor alpha chain-like; Uncharacterized protein; Nb cell deth marker (198 aa)
PGSC0003DMT400028005	Protein stay-green, chloroplastic-like; Staygreen protein (247 aa)
PGSC0003DMT400028090	Uncharacterized loc102587808; Uncharacterized protein; Conserved gene of unknown function (476 aa)
PGSC0003DMT400004553	Xyloglucan endotransglucosylase/hydrolase; Catalyzes xyloglucan endohydrolysis (XEH) and/or endotransglycosylation (XET). Cleaves and religates xyloglucan polymers, an essential constituent of the primary cell wall, and thereby participates in cell wall construction of growing tissues; Belongs to the glycosyl hydrolase 16 family (342 aa)
PGSC0003DMT400011449	Gata transcription factor 21; Uncharacterized protein; GATA domain class transcription factor (286 aa)
PGSC0003DMT400066807	Transcription factor une10; Uncharacterized protein; Putative bHLH transcription factor (464 aa)
PGSC0003DMT400024514	Kinesin-related protein 4-like; Uncharacterized protein; Conserved gene of unknown function (343 aa)
PGSC0003DMT400008103	Fructose-bisphosphate aldolase, class i; Belongs to the class I fructose-bisphosphate aldolase family (397 aa)
PGSC0003DMT400052247	Serine/threonine-protein phosphatase 6 regulatory ankyrin repeat subunit b-like; Uncharacterized protein; Ankyrin (666 aa)
PGSC0003DMT400071045	Uncharacterized protein; Gibberellin 2-oxidase 2; Belongs to the iron/ascorbate-dependent oxidoreductase family (324 aa)
PGSC0003DMT400055219	Protein PHLOEM PROTEIN 2-LIKE A10 (417 aa)
PGSC0003DMT400017805	Lob domain-containing protein 25-like; LOB domain-containing protein (168 aa)
PGSC0003DMT400014548	Uncharacterized protein; Boron transporter (673 aa)
PGSC0003DMT400020005	Uncharacterized protein; Tir-nbs-lrr resistance protein; Belongs to the disease resistance NB-LRR family (1692 aa)
PGSC0003DMT400002668	36.4 kDa proline-rich protein-like; Uncharacterized protein; Pollen Ole e 1 allergen and extensin (334 aa)
PGSC0003DMT400066582	O-acyltransferase wsd1-like; Uncharacterized protein; Conserved gene of unknown function (462 aa)
PGSC0003DMT400064422	Uncharacterized protein; Myosin VIII-2; Belongs to the TRAFAC class myosin-kinesin ATPase superfamily. Myosin family (371 aa)
PGSC0003DMT400040877	Uncharacterized protein; Glycine-rich protein (107 aa)
PGSC0003DMT400006709	Auxin-responsive protein iaa26; Auxin-responsive protein; Aux/IAA proteins are short-lived transcriptional factors that function as repressors of early auxin response genes at low auxin concentrations (283 aa)
PGSC0003DMT400074530	Uncharacterized loc107062965; Uncharacterized protein; Conserved gene of unknown function (258 aa)
PGSC0003DMT400038413	Xyloglucan endotransglucosylase/hydrolase; Catalyzes xyloglucan endohydrolysis (XEH) and/or endotransglycosylation (XET). Cleaves and religates xyloglucan polymers, an essential constituent of the primary cell wall, and thereby participates in cell wall construction of growing tissues; Belongs to the glycosyl hydrolase 16 family (286 aa)
PGSC0003DMT400041381	Monothiol glutaredoxin-s2-like; Glutaredoxin family protein (102 aa)
PGSC0003DMT400030505	Uncharacterized protein; Belongs to the serpin family (403 aa)
PGSC0003DMT400066508	Uncharacterized loc102586586; Uncharacterized protein; Conserved gene of unknown function (106 aa)
PGSC0003DMT400044262	Beta-d-glucosyl crocetin beta-1,6-glucosyltransferase-like; Glycosyltransferase; Glucosyl/glucuronosyl transferases; Belongs to the UDP-glycosyltransferase family (453 aa)
PGSC0003DMT400009817	TRNA-5-taurinomethyluridine 2-sulfurtransferase; Uncharacterized protein; TRNA (5-methylaminomethyl-2-thiouridylate)-methyltransferase (483 aa)
PGSC0003DMT400071418	Uncharacterized loc102586134; Uncharacterized protein; Conserved gene of unknown function (215 aa)
PGSC0003DMT400078368	Uncharacterized protein; Sarcoplasmic reticulum histidine-rich calcium-binding protein (333 aa)
PGSC0003DMT400074599	Gdsl esterase/lipase 1-like; Zinc finger protein; Belongs to the 'GDSL' lipolytic enzyme family (331 aa)
PGSC0003DMT400067985	Uncharacterized loc107063335; Uncharacterized protein; Conserved gene of unknown function (228 aa)
PGSC0003DMT400075461	Udp-glycosyltransferase 74e2-like; Glycosyltransferase; Belongs to the UDP-glycosyltransferase family (451 aa)
PGSC0003DMT400090874	Uncharacterized protein; Transposon protein, CACTA, En/Spm sub-class (97 aa)
PGSC0003DMT400023053	Putative late blight resistance protein homolog r1a-3; Disease resistance protein (193 aa)
PGSC0003DMT400047437	Photosynthetic ndh subunit of lumenal location 2, chloroplastic; Oxygen evolving enhancer protein 3 (193 aa)
PGSC0003DMT400086252	Solute carrier family 36 (proton-coupled amino acid transporter); Uncharacterized protein; Amino acid transporter (425 aa)
PGSC0003DMT400081758	Uncharacterized protein; Pyruvate, phosphate dikinase, chloroplastic (843 aa)
PGSC0003DMT400041156	Phytochrome-interacting factor 4; Uncharacterized protein; Isoform 2 of Transcription factor PIF5 (517 aa)
PGSC0003DMT400000752	Uncharacterized protein; Cytokinin oxidase/dehydrogenase 2 (487 aa)
Osm	Osmotin-like protein osml15; Uncharacterized protein; Osmotin OSML15 (250 aa)
PGSC0003DMT400067951	Uncharacterized protein; Sucrose-phosphate synthase isoform B; Belongs to the glycosyltransferase 1 family (1064 aa)
PGSC0003DMT400079507	Zinc finger (B-box type) family protein (252 aa)
PGSC0003DMT400014529	Vacuolar protein sorting-associated protein ist1; Uncharacterized protein; Conserved gene of unknown function (450 aa)
ADH3	Alcohol dehydrogenase class-p; Alcohol dehydrogenase 3 (380 aa)
PGSC0003DMT400066911	Auxin-responsive protein saur36-like; Auxin-induced protein X10A (159 aa)
PGSC0003DMT400090475	Ethylene-responsive transcription factor 5-like; Uncharacterized protein; Ethylene response factor 5 (245 aa)
PGSC0003DMT400026369	Uncharacterized protein; Avr9/Cf-9 rapidly elicited protein 140 (207 aa)
PGSC0003DMT400071155	Photosystem i reaction center subunit xi, chloroplastic-like; Uncharacterized protein; Photosystem I subunit XI (220 aa)
PGSC0003DMT400058377	Pollen-specific lysine-rich protein SBgLR (211 aa)
PGSC0003DMT400052810	Uncharacterized protein; Major pollen allergen Ory s 1; Belongs to the expansin family (253 aa)
PGSC0003DMT400063292	Uncharacterized protein; Protein ASC1 (305 aa)
PGSC0003DMT400069529	Wuschel-related homeobox 11-like; Homeobox domain containing protein (245 aa)
PGSC0003DMT400030214	Isoflavone 2'-hydroxylase-like; Belongs to the cytochrome P450 family (509 aa)
PGSC0003DMT400052642	Uncharacterized loc102578540; Uncharacterized protein; DNAJ heat shock N-terminal domain-containing protein (335 aa)
PGSC0003DMT400076708	Tag lipase / steryl ester hydrolase / phospholipase a2 / lpa acyltransferase; Uncharacterized protein; Sugar-dependent1 (861 aa)
PGSC0003DMT400075775	Arabidopsis histidine kinase 2/3/4 (cytokinin receptor); Uncharacterized protein; Cytokinin receptor 1 (992 aa)
IVD	Isovaleryl-coa dehydrogenase, mitochondrial-like; Isovaleryl-CoA dehydrogenase, mitochondrial; Involved in the catabolism of amino acids. Uses isovaleryl-CoA as substrate. Minor activity detected with 2- methylpalmitoyl-CoA or 2-methylbutyryl-CoA, but no activity with short- and medium-straight chain acyl-CoA esters or with 2- methylhexanoyl-CoA (412 aa)
PGSC0003DMT400033797	Probable glycosyltransferase at5g03795; Belongs to the glycosyltransferase 47 family (519 aa)
PGSC0003DMT400048879	Lrr receptor-like serine/threonine-protein kinase gso2; Serine/threonine-protein kinase bri1 (989 aa)
PGSC0003DMT400020215	Uncharacterized loc107061081; DNA binding protein (122 aa)
PGSC0003DMT400067870	Protein plastid movement impaired 2-like; Uncharacterized protein; Myosin heavy chain (588 aa)
PGSC0003DMT400023904	Pentatricopeptide repeat-containing protein at3g22150, chloroplastic-like; Pentatricopeptide repeat-containing protein (829 aa)
PGSC0003DMT400033373	Uncharacterized protein; Calmodulin; Belongs to the Ca(2+):cation antiporter (CaCA) (TC 2.A.19) family (695 aa)
PGSC0003DMT400015739	Uncharacterized loc102593758; Uncharacterized protein; Conserved gene of unknown function (106 aa)
PGSC0003DMT400014056	ATP-dependent DNA helicase; Helicase; Belongs to the helicase family (486 aa)
PGSC0003DMT400038196	E3 ubiquitin-protein ligase PUB23-like; RING-type E3 ubiquitin transferase; Spotted leaf protein (418 aa)
PGSC0003DMT400010825	WAT1-related protein At1g09380-like; Nodulin protein (353 aa)
PGSC0003DMT400073277	Uncharacterized protein; Serine-threonine protein kinase, plant-type; Belongs to the protein kinase superfamily. Ser/Thr protein kinase family (1157 aa)
PGSC0003DMT400073837	Receptor protein kinase tmk1; Belongs to the protein kinase superfamily. Ser/Thr protein kinase family (938 aa)
PGSC0003DMT400097280	Probable strigolactone esterase dad2; Sigma factor sigb regulation protein rsbq (124 aa)
PGSC0003DMT400078001	Uncharacterized loc102604525; Uncharacterized protein; IMP dehydrogenase/GMP reductase (398 aa)
PGSC0003DMT400028622	Probable serine/threonine-protein kinase at5g41260; Receptor protein kinase (491 aa)
PGSC0003DMT400051197	Anthocyanidin reductase-like; Uncharacterized protein; Nadhp hc toxin reductase (336 aa)
PGSC0003DMT400066600	Uncharacterized protein; Methylcrotonoyl-CoA carboxylase beta chain, mitochondrial (517 aa)
PGSC0003DMT400065023	Disease resistance protein rpm1-like; NBS-LRR type disease resistance protein; Belongs to the disease resistance NB-LRR family (949 aa)
PGSC0003DMT400020318	F-box/lrr-repeat max2 homolog a-like; F-box family protein (723 aa)
PGSC0003DMT400042807	Glycosyltransferase; Glucosyltransferase; Belongs to the UDP-glycosyltransferase family (438 aa)
PGSC0003DMT400067526	Phospholipase a1-ibeta2, chloroplastic-like; Uncharacterized protein; Phospholipase A1 (494 aa)
PGSC0003DMT400006256	Uncharacterized loc102599048; Uncharacterized protein; Gene of unknown function (493 aa)
PGSC0003DMT400011823	Calcium-dependent protein kinase 17; Calcium-dependent protein kinase (535 aa)
PGSC0003DMT400054712	Uncharacterized protein; AML1 (849 aa)
PGSC0003DMT400004157	Auxin-induced protein 15a-like; Uncharacterized protein; Auxin-induced SAUR (85 aa)
PGSC0003DMT400076776	Haloacid dehalogenase-like hydrolase domain-containing protein 3; Uncharacterized protein; N-acylneuraminate-9-phosphatase (299 aa)
PGSC0003DMT400051832	Serine carboxypeptidase-like clade i; Wound-inducible carboxypeptidase; Belongs to the peptidase S10 family (498 aa)
PGSC0003DMT400028893	Putative disease resistance protein rga4; Leucine-rich repeat containing protein (273 aa)
PGSC0003DMT400030019	Disease resistance protein rpp13-like; Rpi protein; Belongs to the disease resistance NB-LRR family (844 aa)
PGSC0003DMT400022696	Putative pentatricopeptide repeat-containing protein at3g15130; Pentatricopeptide repeat-containing protein (693 aa)
PGSC0003DMT400025653	Catalase isozyme 3; Catalase; Occurs in almost all aerobically respiring organisms and serves to protect cells from the toxic effects of hydrogen peroxide (492 aa)
PGSC0003DMT400039186	Uncharacterized loc102595893; Uncharacterized protein; Copine (960 aa)
PGSC0003DMT400038374	Mitogen-activated protein kinase kinase kinase 3-like; Protein kinase (281 aa)
PGSC0003DMT400083245	Trans-resveratrol di-o-methyltransferase-like; Uncharacterized protein; Conserved gene of unknown function; Belongs to the class I-like SAM-binding methyltransferase superfamily. Cation-independent O- methyltransferase family (359 aa)
PGSC0003DMT400040021	Transcription factor hbi1; Uncharacterized protein; Transcription factor bHLH63 (303 aa)
PGSC0003DMT400069660	Protein nrt1/ ptr family 2.11-like; Uncharacterized protein; Nitrate transporter (578 aa)
PGSC0003DMT400024968	Uncharacterized protein; K+ channel inward rectifying (689 aa)
PGSC0003DMT400070176	Magnesium-chelatase subunit chlh, chloroplastic; Uncharacterized protein; Mg protoporphyrin IX chelatase (1381 aa)
PGSC0003DMT400012190	Flavonoid 3'-monooxygenase-like; Belongs to the cytochrome P450 family (521 aa)
PGSC0003DMT400003803	Uncharacterized protein; Transposase (131 aa)
PGSC0003DMT400029056	Btb/poz domain-containing protein at2g24240-like; Uncharacterized protein; Potassium channel tetramerization domain-containing protein (441 aa)
PGSC0003DMT400020923	Uncharacterized protein; KiTH-2 (160 aa)
PGSC0003DMT400057126	Uncharacterized protein; Pirin; Belongs to the pirin family (298 aa)
PGSC0003DMT400047279	Aromatic-l-amino-acid/l-tryptophan decarboxylase; Uncharacterized protein; Tryptophan decarboxylase (471 aa)
PGSC0003DMT400042614	Protein plant cadmium resistance 8; Uncharacterized Cys-rich domain (183 aa)
PGSC0003DMT400031969	Glutaredoxin domain-containing cysteine-rich protein 1; Uncharacterized protein; Electron transporter (391 aa)
PGSC0003DMT400068847	Uncharacterized protein; Conserved gene of unknown function; Belongs to the cytochrome P450 family (503 aa)
PGSC0003DMT400026262	Uncharacterized protein; Conserved gene of unknown function (245 aa)
PGSC0003DMT400011069	Nac domain-containing protein 83-like; NAC domain protein (260 aa)
PGSC0003DMT400072823	Uncharacterized loc102578430; Uncharacterized protein; Transferase, transferring glycosyl groups (471 aa)
PGSC0003DMT400033356	Serine/threonine-protein kinase ht1-like; Protein kinase (PK) (484 aa)
Hexokinase-1	Phosphotransferase; Hexokinase 5; Belongs to the hexokinase family (499 aa)
PGSC0003DMT400022873	1-aminocyclopropane-1-carboxylate oxidase homolog 1-like; Uncharacterized protein; Desacetoxyvindoline 4-hydroxylase; Belongs to the iron/ascorbate-dependent oxidoreductase family (743 aa)
PGSC0003DMT400080097	Gdsl esterase/lipase at1g33811; Zinc finger protein; Belongs to the 'GDSL' lipolytic enzyme family (366 aa)
PGSC0003DMT400015010	B3 domain-containing transcription factor NGA3-like; Uncharacterized protein; Transcription factor (300 aa)
PGSC0003DMT400012771	Glutathione s-transferase t1-like; Belongs to the GST superfamily (236 aa)
PGSC0003DMT400023077	B3 domain-containing protein At2g36080-like; Uncharacterized protein; Transcription factor (335 aa)
PGSC0003DMT400074501	Glycine-rich cell wall structural protein 1 (402 aa)
PGSC0003DMT400024517	Sulfate transporter 2, low-affinity; Uncharacterized protein; Sulfate transporter (653 aa)
PGSC0003DMT400068735	Uncharacterized loc102579030; Uncharacterized protein; ATP-dependent peptidase (295 aa)
PGSC0003DMT400067667	Uncharacterized protein; C2H2 zinc finger protein FZF (333 aa)
PGSC0003DMT400074062	Uncharacterized loc102586921; Uncharacterized protein; Conserved gene of unknown function (287 aa)
PGSC0003DMT400046962	Hydrophobic protein lti6a-like; Low temperature and salt responsive protein (56 aa)
PGSC0003DMT400067982	Putative disease resistance protein at4g11170; ATP binding protein (445 aa)
PGSC0003DMT400055138	Xyloglucan endotransglucosylase/hydrolase; Catalyzes xyloglucan endohydrolysis (XEH) and/or endotransglycosylation (XET). Cleaves and religates xyloglucan polymers, an essential constituent of the primary cell wall, and thereby participates in cell wall construction of growing tissues; Belongs to the glycosyl hydrolase 16 family (295 aa)
PGSC0003DMT400035610	Pentatricopeptide repeat-containing protein at3g42630; Pentatricopeptide repeat-containing protein (416 aa)
PGSC0003DMT400037716	Transcription factor myb, plant; Uncharacterized protein; MYB transcription factor MYB84 (273 aa)
PGSC0003DMT400000210	Pheromone receptor transcription factor; Mads box protein (143 aa)
PGSC0003DMT400053861	Probable receptor-like protein kinase at5g39020; Uncharacterized protein; Stress-induced receptor-like kinase (623 aa)
PGSC0003DMT400076107	Autophagy-related protein 18a-like; WD-repeat protein (428 aa)
PGSC0003DMT400067285	Histone-lysine n-methyltransferase atxr3-like; SET domain-containing protein (203 aa)
PGSC0003DMT400020887	Uncharacterized loc102579905; Glycosyl transferase family 2 protein (843 aa)
Actin-75	Uncharacterized protein; Actin; Belongs to the actin family (377 aa)
PGSC0003DMT400034213	Uncharacterized loc102595100; Uncharacterized protein; Conserved gene of unknown function (663 aa)
PGSC0003DMT400046653	C2 and GRAM domain-containing protein (1019 aa)
PGSC0003DMT400009964	Glycosyltransferase; UDP-glucose:glucosyltransferase; Belongs to the UDP-glycosyltransferase family (488 aa)
PGSC0003DMT400015998	Uncharacterized protein; Monoterpene synthase 2 (581 aa)
G6PD	Glucose-6-phosphate 1-dehydrogenase, chloroplastic-like; Glucose-6-phosphate 1-dehydrogenase, chloroplastic; Catalyzes the rate-limiting step of the oxidative pentose-phosphate pathway, which represents a route for the dissimilation of carbohydrates besides glycolysis. The main function of this enzyme is to provide reducing power (NADPH) and pentose phosphates for fatty acid and nucleic acid synt…
PGSC0003DMT400031363	Uncharacterized protein; Pectin methlyesterase inhibitor protein 1 (201 aa)
PGSC0003DMT400049354	Uncharacterized protein; Conserved gene of unknown function (72 aa)
PGSC0003DMT400048109	Putative disease resistance rpp13-like protein 1; Disease resistance protein I2 (466 aa)
PGSC0003DMT400068502	Uncharacterized loc102604660; Uncharacterized protein; Conserved gene of unknown function (270 aa)
PGSC0003DMT400024721	Uncharacterized loc107060084; Specific tissue protein 2 (380 aa)
PGSC0003DMT400092345	Uncharacterized loc102580982; Uncharacterized protein; Gene of unknown function (106 aa)
PGSC0003DMT400039852	Subtilisin-like protease sbt1.7; Belongs to the peptidase S8 family (721 aa)
PGSC0003DMT400043995	Dna topoisomerase 6 subunit b-like; Uncharacterized protein; Type II DNA topoisomerase VI subunit B (223 aa)
PGSC0003DMT400020353	Putative late blight resistance protein homolog r1a-10; Disease resistance protein Gpa2; Belongs to the disease resistance NB-LRR family (904 aa)
PGSC0003DMT400081828	Cytokinin riboside 5'-monophosphate phosphoribohydrolase; Cytokinin-activating enzyme working in the direct activation pathway. Phosphoribohydrolase that converts inactive cytokinin nucleotides to the biologically active free-base forms (205 aa)
Lhca3	Light-harvesting complex i chlorophyll a/b binding protein 3; Chlorophyll a-b binding protein, chloroplastic; The light-harvesting complex (LHC) functions as a light receptor, it captures and delivers excitation energy to photosystems with which it is closely associated (273 aa)
PGSC0003DMT400011671	Crib domain-containing protein ric4-like; Uncharacterized protein; Wiscott-Aldrich syndrome, C-terminal (167 aa)
PGSC0003DMT400002598	Probable lrr receptor-like serine/threonine-protein kinase at3g47570; Uncharacterized protein; Receptor-kinase; Belongs to the protein kinase superfamily. Ser/Thr protein kinase family (1002 aa)
PGSC0003DMT400024329	Transcription factor tcp4; Uncharacterized protein; Transcription factor (311 aa)
PGSC0003DMT400024565	Uncharacterized protein pam68-like; Uncharacterized protein; ABC-type Co2+ transport system, permease component (182 aa)
PGSC0003DMT400075387	Uncharacterized protein; HECT; Ubiquitin (809 aa)
PGSC0003DMT400029858	Pentatricopeptide repeat-containing protein at3g04760, chloroplastic; Pentatricopeptide repeat-containing protein (583 aa)
PGSC0003DMT400075658	Protein pam68, chloroplastic; Uncharacterized protein; ABC-type Co2+ transport system, permease component (197 aa)
StUGE51	Udp-glucose 4-epimerase; Belongs to the NAD(P)-dependent epimerase/dehydratase family (351 aa)
PGSC0003DMT400029402	Two-component response regulator-like aprr5; Uncharacterized protein; Pseudo-response regulator 9 (640 aa)
PGSC0003DMT400032020	Glycerol-3-phosphate O-acyltransferase 3/4; Uncharacterized protein; Glycerol-3-phosphate acyltransferase (371 aa)
Lsi1	Uncharacterized protein; Gene of unknown function; Belongs to the MIP/aquaporin (TC 1.A.8) family (178 aa)
PGSC0003DMT400014742	Uncharacterized protein; Calcium-binding allergen Ole e 8 (164 aa)
PGSC0003DMT400014397	Protein sar deficient 1-like; Calmodulin-binding protein (444 aa)
PGSC0003DMT400052344	Uncharacterized loc102579061; Uncharacterized protein; Conserved gene of unknown function (261 aa)
PGSC0003DMT400032725	Probable protein phosphatase 2c 62; Protein phosphatase 2c (956 aa)
InvCD141	Beta-fructofuranosidase, insoluble isoenzyme 1-like; Uncharacterized protein; Beta-fructofuranosidase; Belongs to the glycosyl hydrolase 32 family (582 aa)
PGSC0003DMT400063835	Psbp domain-containing protein 4, chloroplastic; Thylakoid lumenal 29.8 kDa protein, chloroplast (226 aa)
PGSC0003DMT400069515	Uncharacterized loc102578639; Uncharacterized protein; UP-9A (113 aa)
PGSC0003DMT400007258	Uncharacterized loc102583373; Uncharacterized protein; 2-deoxyglucose-6-phosphate phosphatase (103 aa)
PGSC0003DMT400047172	Uncharacterized loc102597343; Uncharacterized protein; Gene of unknown function (106 aa)
PGSC0003DMT400048252	Putative upf0481 protein at3g02645; Uncharacterized protein; Conserved gene of unknown function (514 aa)
PGSC0003DMT400078972	Metallocarboxypeptidase inhibitor-like; Uncharacterized protein; Metallocarboxypeptidase inhibitor (80 aa)
PGSC0003DMT400050047	Uncharacterized loc102594549; Uncharacterized protein; Conserved gene of unknown function (427 aa)
PGSC0003DMT400016056	Uncharacterized protein; NtPRp27 (226 aa)
PGSC0003DMT400057311	Probable amino acid permease 7; Uncharacterized protein; Amino acid transporter (472 aa)
PGSC0003DMT400039384	Btb/poz and taz domain-containing protein 1; BTB/POZ domain-containing protein (345 aa)
PGSC0003DMT400019296	AP2/ERF and B3 domain-containing transcription factor RAV1; Uncharacterized protein; RAV (371 aa)
PGSC0003DMT400072045	Uncharacterized loc102591596; Uncharacterized protein; Conserved gene of unknown function (213 aa)
PGSC0003DMT400027459	(-)-germacrene d synthase-like; Uncharacterized protein; Sesquiterpene synthase (499 aa)
PGSC0003DMT400057913	Sodium/hydrogen exchanger 2; Uncharacterized protein; Sodium/hydrogen exchanger (536 aa)
PGSC0003DMT400076442	Uncharacterized loc102589326; Uncharacterized protein; Conserved gene of unknown function (302 aa)
PGSC0003DMT400052636	Protein trichome birefringence-like 39; Uncharacterized protein; Conserved gene of unknown function (362 aa)
PGSC0003DMT400021634	Uncharacterized protein; Cc-nbs-lrr resistance protein; Belongs to the disease resistance NB-LRR family (1273 aa)
PGSC0003DMT400047076	Transcription factor myb35-like; Uncharacterized protein; MYB domain class transcription factor (426 aa)
PGSC0003DMT400068341	Cationic peroxidase 1-like; Class III peroxidase; Belongs to the peroxidase family. Classical plant (class III) peroxidase subfamily (316 aa)
PGSC0003DMT400009445	Putative s-adenosyl-l-methionine-dependent methyltransferase mb0746c; Methyltransferase, TIGR00027 family protein (332 aa)
PGSC0003DMT400074565	Uncharacterized loc102593397; Uncharacterized protein; Conserved gene of unknown function (87 aa)
PGSC0003DMT400025568	Gdsl esterase/lipase exl3-like; Zinc finger protein; Belongs to the 'GDSL' lipolytic enzyme family (350 aa)
PGSC0003DMT400051137	Transcription factor bhlh137-like; Uncharacterized protein; BHLH transcription factor Upa20 (338 aa)
PGSC0003DMT400051932	Photosystem i reaction center subunit iv a, chloroplastic; Uncharacterized protein; Photosystem I reaction center subunit IV A isoform 2 (99 aa)
PGSC0003DMT400002020	Diacetyl reductase [(s)-acetoin forming]-like; Uncharacterized protein; Short-chain dehydrogenase (263 aa)
PGSC0003DMT400081937	Tropinone reductase-like 1; Uncharacterized protein; Short chain alcohol dehydrogenase (272 aa)
PGSC0003DMT400008432	Beta-amyrin 28-monooxygenase; Belongs to the cytochrome P450 family (474 aa)
PGSC0003DMT400088362	Probable acetyltransferase nata1-like; Uncharacterized protein; N-hydroxycinnamoyl-CoA:tyramine N-hydroxycinnamoyl transferase THT1-3 (297 aa)
PGSC0003DMT400044514	Uncharacterized protein; CYP72A57; Belongs to the cytochrome P450 family (518 aa)
PGSC0003DMT400000440	Cytochrome p450 704c1-like; Belongs to the cytochrome P450 family (515 aa)
PGSC0003DMT400017968	Protein nuclear fusion defective 4-like; Uncharacterized protein; Nodulin (571 aa)
WIN1	Wound-induced protein win1-like; Wound-induced protein WIN1 (212 aa)
PGSC0003DMT400068508	Uncharacterized loc102604336; DNA binding protein (327 aa)
PGSC0003DMT400068499	Ethylene-overproduction protein 1 (939 aa)
PGSC0003DMT400070196	Heat shock transcription factor, other eukaryote; Uncharacterized protein; AT-HSFB3 (Arabidopsis thaliana heat shock transcription factor B3) (247 aa)
PGSC0003DMT400012126	Putative glucuronosyltransferase pgsip8; Uncharacterized protein; Glucosyltransferase (476 aa)
PGSC0003DMT400070567	Probable strigolactone esterase d14 homolog; Sigma factor sigb regulation protein rsbq (268 aa)
PGSC0003DMT400072464	Probable mediator of rna polymerase ii transcription subunit 26b; Uncharacterized protein; Conserved gene of unknown function (455 aa)
PGSC0003DMT400034435	Uncharacterized protein; Carbon-sulfur lyase (141 aa)
PGSC0003DMT400050673	Probable leucine-rich repeat receptor-like protein kinase at1g68400; Serine-threonine protein kinase, plant-type (636 aa)
PGSC0003DMT400080229	Probable lrr receptor-like serine/threonine-protein kinase at1g06840; LRR receptor-like serine/threonine-protein kinase (518 aa)
PGSC0003DMT400036329	Xyloglucan endotransglucosylase/hydrolase; Catalyzes xyloglucan endohydrolysis (XEH) and/or endotransglycosylation (XET). Cleaves and religates xyloglucan polymers, an essential constituent of the primary cell wall, and thereby participates in cell wall construction of growing tissues; Belongs to the glycosyl hydrolase 16 family (282 aa)
PGSC0003DMT400004251	Cytochrome p450 714c2-like; Belongs to the cytochrome P450 family (513 aa)
PGSC0003DMT400041065	Dehydration-responsive element-binding protein 2a-like; Uncharacterized protein; DREB (438 aa)
BBX14	Zinc finger protein constans-like 16-like; B-box zinc finger protein 14; Conserved gene of unknown function (401 aa)
PGSC0003DMT400076637	Uncharacterized loc102593771; Uncharacterized protein; Conserved gene of unknown function (123 aa)
PGSC0003DMT400011424	Uncharacterized loc107058408; Uncharacterized protein; Conserved gene of unknown function (183 aa)
PGSC0003DMT400050410	Wd repeat-containing protein 44-like; WD-repeat protein (701 aa)
PGSC0003DMT400001980	Mitogen-activated protein kinase kinase kinase yoda-like; MAP protein kinase (629 aa)
PGSC0003DMT400023033	Dof zinc finger protein dof2.4-like; F-box family protein (403 aa)
PGSC0003DMT400035748	Transcription factor myb114-like; Uncharacterized protein; MYB domain class transcription factor (231 aa)
KST1	K+ channel inward rectifying (688 aa)
PGSC0003DMT400048544	Uncharacterized loc102592161; Uncharacterized protein; Conserved gene of unknown function (351 aa)
PGSC0003DMT400080921	Uncharacterized protein; Conserved gene of unknown function; Belongs to the cytochrome P450 family (491 aa)
PGSC0003DMT400032091	Probable wrky transcription factor 29; Uncharacterized protein; WRKY transcription factor (307 aa)
PGSC0003DMT400037756	Uncharacterized loc102578738; Uncharacterized protein; Conserved gene of unknown function (163 aa)
PGSC0003DMT400024729	Organ-specific protein s2-like; Specific tissue protein 1 (207 aa)
PGSC0003DMT400065971	Putative disease resistance protein rga3; Cc-nbs-lrr resistance protein; Belongs to the disease resistance NB-LRR family (962 aa)
Kinesin-4	Uncharacterized protein; Kinesin heavy chain; Belongs to the TRAFAC class myosin-kinesin ATPase superfamily. Kinesin family (1013 aa)
PGSC0003DMT400031149	Flavonol synthase/flavanone 3-hydroxylase; Uncharacterized protein; Oxidoreductase; Belongs to the iron/ascorbate-dependent oxidoreductase family (356 aa)
PGSC0003DMT400033084	Putative upf0481 protein at3g02645; Uncharacterized protein; Conserved gene of unknown function (449 aa)
PGSC0003DMT400027295	Tmv resistance protein n-like; Uncharacterized protein; Nematode resistance (862 aa)
PGSC0003DMT400064369	Protochlorophyllide reductase-like; Phototransformation of protochlorophyllide (Pchlide) to chlorophyllide (Chlide) (398 aa)
PGSC0003DMT400029525	Monothiol glutaredoxin-s2-like; Glutaredoxin family protein (102 aa)
PGSC0003DMT400064749	UPF0301 protein CHU_1773; Uncharacterized protein; Conserved gene of unknown function (307 aa)
PGSC0003DMT400083077	Gibberellin-regulated protein 6-like; Uncharacterized protein; Gip1 (103 aa)
PGSC0003DMT400001899	Uncharacterized protein; Conserved gene of unknown function (372 aa)
PGSC0003DMT400012338	Protein early flowering 3-like; Uncharacterized protein; Conserved gene of unknown function (653 aa)
PGSC0003DMT400012975	Sphingosine kinase 2-like; Uncharacterized protein; Sphingosine kinase (486 aa)
PGSC0003DMT400060458	Probable sulfate transporter 4.2; Uncharacterized protein; Sulfate transporter (716 aa)
PGSC0003DMT400056206	Uncharacterized protein; Gene of unknown function (326 aa)
PGSC0003DMT400060553	Uncharacterized protein; GRAS1; Belongs to the GRAS family (524 aa)
PGSC0003DMT400042095	Serine/threonine-protein kinase osr1/stk39; Serine/threonine protein kinase (523 aa)
PGSC0003DMT400059754	Uncharacterized protein; Sn-2 protein (147 aa)
PGSC0003DMT400080690	Fatty acid omega-hydroxylase; Uncharacterized protein; Cytochrome P450-dependent fatty acid hydroxylase (501 aa)
PGSC0003DMT400065581	Putative late blight resistance protein homolog r1a-3; Late blight resistance protein Rpi-blb2; Belongs to the disease resistance NB-LRR family (1265 aa)
PGSC0003DMT400061974	Solute carrier family 15 (peptide/histidine transporter), member 3/4; Uncharacterized protein; Peptide transporter (597 aa)
PGSC0003DMT400071600	Uncharacterized protein; DNA-3-methyladenine glycosylase (348 aa)
NAC2	Nac transcription factor 29-like; NAC domain protein NAC2 (282 aa)
PGSC0003DMT400028676	Protein lurp-one-related 10-like; Uncharacterized protein; Conserved gene of unknown function (212 aa)
PGSC0003DMT400058560	Agamous-like mads-box protein agl19; Uncharacterized protein; MADS box transcription factor (224 aa)
PGSC0003DMT400047695	F-box protein skip31-like; F-box domain containing protein (156 aa)
PGSC0003DMT400071445	Tmv resistance protein n-like; Uncharacterized protein; TIR-NBS-LRR disease resistance (1064 aa)
PGSC0003DMT400036038	Uncharacterized protein; Negative regulator of the PHO system (826 aa)
PGSC0003DMT400001635	F-box protein at5g49610-like; Ubiquitin-protein ligase (371 aa)
PGSC0003DMT400046778	Lrr receptor-like serine/threonine-protein kinase gso1; Serine-threonine protein kinase, plant-type (974 aa)
PGSC0003DMT400023251	Uncharacterized loc102604741; Uncharacterized protein; Triacylglycerol lipase (737 aa)
PGSC0003DMT400021884	Uncharacterized protein; Belongs to the protein kinase superfamily (403 aa)
PGSC0003DMT400066559	Uncharacterized protein; C2 domain-containing protein (235 aa)
PGSC0003DMT400050352	ELF4-like protein; ELF4 (109 aa)
PGSC0003DMT400068186	Glutamate receptor, ionotropic, plant; Glutamate receptor; Glutamate-gated receptor that probably acts as non- selective cation channel (933 aa)
PGSC0003DMT400055162	Act domain-containing protein acr1; Amino acid binding protein (487 aa)
PGSC0003DMT400029520	Solute carrier family 50 (sugar transporter); Bidirectional sugar transporter SWEET; Mediates both low-affinity uptake and efflux of sugar across the membrane (287 aa)
PGSC0003DMT400020361	E3 ubiquitin-protein ligase RMA1H1-like; E3 ubiquitin-protein ligase RMA1H1 (231 aa)
PGSC0003DMT400030796	Uncharacterized loc102586234; Protein kinase APK1B, chloroplast (143 aa)
PGSC0003DMT400022085	Peptidyl-prolyl cis-trans isomerase cyp37, chloroplastic; Uncharacterized protein; Peptidyl-prolyl cis-trans isomerase (451 aa)
PGSC0003DMT400014597	Uncharacterized loc102602328; Uncharacterized protein; Carboxylic ester hydrolase (700 aa)
PGSC0003DMT400067636	Uncharacterized protein; Pectinesterase (175 aa)
PGSC0003DMT400040761	Transcription factor fama-like; Uncharacterized protein; Transcription factor FAMA (390 aa)
PGSC0003DMT400035020	Uncharacterized loc107062267; Uncharacterized protein; Conserved gene of unknown function (140 aa)
PGSC0003DMT400018834	Uncharacterized loc102596254; Heat shock protein binding protein (572 aa)
CHL1	Transcription factor hbi1-like; Basic helix-loop-helix protein BHLH7 (442 aa)
PGSC0003DMT400003629	Phosphate transporter pho1 homolog 3-like; Uncharacterized protein; SPX, N-terminal; EXS, C-terminal (766 aa)
PGSC0003DMT400015828	Uncharacterized protein; Hydroxypyruvate reductase; Belongs to the D-isomer specific 2-hydroxyacid dehydrogenase family (386 aa)
Cab1	Light-harvesting complex i chlorophyll a/b binding protein 4; Chlorophyll a-b binding protein, chloroplastic; The light-harvesting complex (LHC) functions as a light receptor, it captures and delivers excitation energy to photosystems with which it is closely associated (251 aa)
PGSC0003DMT400058116	Uncharacterized protein; 26S proteasome non-atpase regulatory subunit (426 aa)
PGSC0003DMT400011307	Putative disease resistance protein rga3; Cc-nbs-lrr resistance protein; Belongs to the disease resistance NB-LRR family (405 aa)
PGSC0003DMT400037065	Uncharacterized loc102578555; Uncharacterized protein; Conserved gene of unknown function (129 aa)
PGSC0003DMT400007531	Receptor-like protein 12; Uncharacterized protein; Cf-2.1 (758 aa)
PGSC0003DMT400025179	Probable s-adenosylmethionine-dependent methyltransferase at5g38100; Uncharacterized protein; Conserved gene of unknown function (341 aa)
PGSC0003DMT400023099	Uncharacterized protein; Desacetoxyvindoline 4-hydroxylase; Belongs to the iron/ascorbate-dependent oxidoreductase family (364 aa)
PGSC0003DMT400067619	Protein glutamine dumper 1-like; Uncharacterized protein; GDU1 (182 aa)
PGSC0003DMT400056515	Uncharacterized loc102593495; Uncharacterized protein; Gene of unknown function (139 aa)
PGSC0003DMT400004212	Uncharacterized protein; Sterol desaturase; Belongs to the sterol desaturase family (622 aa)
PGSC0003DMT400073388	Uncharacterized loc102589576; Uncharacterized protein; Conserved gene of unknown function (371 aa)
PGSC0003DMT400005151	Uncharacterized loc102582290; Uncharacterized protein; Conserved gene of unknown function (174 aa)
PGSC0003DMT400061093	Uncharacterized loc102603732; Uncharacterized protein; Conserved gene of unknown function (322 aa)
PGSC0003DMT400060348	Probable tyrosine-protein phosphatase at1g05000; Tyrosine-protein phosphatase SIW14 (195 aa)
PGSC0003DMT400043601	Gelsolin-related protein of 125 kda-like; Uncharacterized protein; RCG54054 (584 aa)
PGSC0003DMT400066791	Pectinesterase 2; In the C-terminal section; belongs to the pectinesterase family (516 aa)
PGSC0003DMT400009059	Uncharacterized loc107059094; Uncharacterized protein; Conserved gene of unknown function (249 aa)
PGSC0003DMT400069670	Uncharacterized loc102592115; Uncharacterized protein; Conserved gene of unknown function (340 aa)
PGSC0003DMT400062510	Uncharacterized protein; Leaf protein (619 aa)
PGSC0003DMT400031401	Ethylene-responsive transcription factor rap2-7; Uncharacterized protein; APETALA2 (407 aa)
PGSC0003DMT400076871	Er membrane protein complex subunit 7 homolog; Uncharacterized protein; Conserved gene of unknown function (154 aa)
PGSC0003DMT400057552	Pentatricopeptide repeat-containing protein at4g13650; Pentatricopeptide repeat-containing protein (1057 aa)
PGSC0003DMT400062486	Protein enhanced disease resistance 2-like; Uncharacterized protein; Pleckstrin homology (PH) domain-containing protein / lipid-binding START domain-containing protein (732 aa)
PGSC0003DMT400030271	Dirigent protein 16-like; Dirigent protein; Dirigent proteins impart stereoselectivity on the phenoxy radical-coupling reaction, yielding optically active lignans from two molecules of coniferyl alcohol in the biosynthesis of lignans, flavonolignans, and alkaloids and thus plays a central role in plant secondary metabolism (246 aa)
PGSC0003DMT400057066	Nuclear transcription factor y subunit b-3-like; Uncharacterized protein; Ccaat-binding transcription factor subunit A (185 aa)
PGSC0003DMT400069254	Uncharacterized protein; Steroleosin; Belongs to the short-chain dehydrogenases/reductases (SDR) family (349 aa)
PGSC0003DMT400076803	Ornithine aminotransferase, mitochondrial; Uncharacterized protein; Ornithine aminotransferase (249 aa)
PGSC0003DMT400082082	Uncharacterized loc102602108; Uncharacterized protein; Conserved gene of unknown function (302 aa)
PGSC0003DMT400045647	4-hydroxyphenylpyruvate dioxygenase-like; 4-hydroxyphenylpyruvate dioxygenase (442 aa)
PGSC0003DMT400026882	Uncharacterized protein; Galactose-binding like (115 aa)
PGSC0003DMT400021509	Glutamate dehydrogenase (nad(p)+); Glutamate dehydrogenase A; Belongs to the Glu/Leu/Phe/Val dehydrogenases family (411 aa)
PGSC0003DMT400030604	Solute carrier family 31 (copper transporter), member 1; Uncharacterized protein; Copper transporter (137 aa)
PGSC0003DMT400027522	Lim domain-containing protein wlim1-like; Uncharacterized protein; Transcription factor LIM (193 aa)
PGSC0003DMT400053693	Lrr receptor-like serine/threonine-protein kinase fls2; Uncharacterized protein; Conserved gene of unknown function; Belongs to the protein kinase superfamily. Ser/Thr protein kinase family (2007 aa)
PGSC0003DMT400025989	Uncharacterized loc102601421; Uncharacterized protein; Conserved gene of unknown function (1140 aa)
PGSC0003DMT400044066	Class i heat shock protein-like; Hsp20.1 protein; Belongs to the small heat shock protein (HSP20) family (140 aa)
PGSC0003DMT400097765	RING-H2 finger protein ATL60-like; Uncharacterized protein; ACRE 132 (261 aa)
PGSC0003DMT400015557	Uncharacterized protein; Geraniol 10-hydroxylase; Belongs to the cytochrome P450 family (466 aa)
PGSC0003DMT400052148	Transcription-repair-coupling factor; Uncharacterized protein; Dead box ATP-dependent RNA helicase (103 aa)
PSBP	Oxygen-evolving enhancer protein 2, chloroplastic; May be involved in the regulation of photosystem II (280 aa)
PGSC0003DMT400015740	Light-harvesting complex ii chlorophyll a/b binding protein 2; Chlorophyll a-b binding protein, chloroplastic; The light-harvesting complex (LHC) functions as a light receptor, it captures and delivers excitation energy to photosystems with which it is closely associated (265 aa)
PGSC0003DMT400020349	Putative late blight resistance protein homolog r1a-3; NBS-LRR protein; Belongs to the disease resistance NB-LRR family (950 aa)
PGSC0003DMT400039283	Malate synthase, glyoxysomal-like; Malate synthase, glyoxysomal; Belongs to the malate synthase family (571 aa)
PGSC0003DMT400046645	Transcription factor myb, plant; Uncharacterized protein; R2r3-myb transcription factor (325 aa)
PGSC0003DMT400082063	Serine/threonine-protein kinase sty8; Protein kinase atmrk1 (395 aa)
PGSC0003DMT400000054	Uncharacterized protein; Beta-hydroxyisobutyryl-CoA hydrolase 1; Belongs to the enoyl-CoA hydratase/isomerase family (384 aa)
PGSC0003DMT400055916	Btb/poz domain-containing protein at3g22104-like; Root phototropism protein; Belongs to the NPH3 family (334 aa)
PGSC0003DMT400044579	Uncharacterized loc102603394; Uncharacterized protein; Conserved gene of unknown function (172 aa)
PGSC0003DMT400021318	Uncharacterized protein; CYP72A54; Belongs to the cytochrome P450 family (516 aa)
PGSC0003DMT400037884	Uncharacterized protein; GRAS family transcription factor; Belongs to the GRAS family (419 aa)
PGSC0003DMT400064047	Uncharacterized loc102592013; Uncharacterized protein; Conserved gene of unknown function (228 aa)
PGSC0003DMT400071157	Nad(p)h-quinone oxidoreductase subunit u, chloroplastic; Uncharacterized protein; DNAJ heat shock N-terminal domain-containing protein (210 aa)
PGSC0003DMT400065492	Mitogen-activated protein kinase kinase kinase 1-like; ATP binding protein; Belongs to the protein kinase superfamily (356 aa)
PGSC0003DMT400044017	Uncharacterized loc107058754; Uncharacterized protein; Conserved gene of unknown function (137 aa)
PGSC0003DMT400033381	Uncharacterized loc102600765; Uncharacterized protein; Conserved gene of unknown function (306 aa)
PGSC0003DMT400047339	Uncharacterized loc102585518; Uncharacterized protein; Conserved gene of unknown function (87 aa)
PGSC0003DMT400036326	Uncharacterized loc102592064; Uncharacterized protein; Gene of unknown function (124 aa)
PGSC0003DMT400023917	Nac domain-containing protein 2-like; Uncharacterized protein; Nam 10 (291 aa)
PGSC0003DMT400067194	Psbp domain-containing protein 6, chloroplastic; Thylakoid lumenal 29.8 kDa protein, chloroplast (250 aa)
PGSC0003DMT400075804	Probable peroxygenase 5; Calcium ion binding protein (193 aa)
PGSC0003DMT400063076	Uncharacterized protein; Conserved gene of unknown function (1092 aa)
PGSC0003DMT400074503	Uncharacterized protein; Glycine-rich cell wall structural protein 1 (386 aa)
PGSC0003DMT400048728	Uncharacterized protein; Mechanosensitive ion channel domain-containing protein (974 aa)
PGSC0003DMT400037190	25.3 kDa vesicle transport protein; Uncharacterized protein; R-SNARE, SEC22-family; Belongs to the synaptobrevin family (219 aa)
PGSC0003DMT400076507	WAT1-related protein At1g68170-like; Auxin-induced protein 5NG4 (390 aa)
PGSC0003DMT400036859	Uncharacterized loc102590599; Uncharacterized protein; Conserved gene of unknown function (517 aa)
PGSC0003DMT400018218	Epidermis-specific secreted glycoprotein ep1-like; Epidermis-specific secreted glycoprotein EP1 (297 aa)
Amy23	Alpha-amylase-like; Alpha-amylase; Belongs to the glycosyl hydrolase 13 family (423 aa)
PGSC0003DMT400056078	Uncharacterized loc102598939; Uncharacterized protein; Kinesin heavy chain (128 aa)
PGSC0003DMT400022771	Transcription factor myb, plant; Uncharacterized protein; Phantastica (361 aa)
ERF5	Ethylene-responsive transcription factor erf106-like; Uncharacterized protein; Ethylene response factor 4 (206 aa)
PGSC0003DMT400017780	Neurofilament medium polypeptide; Uncharacterized protein; Gene of unknown function (115 aa)
PGSC0003DMT400045167	RING-H2 finger protein ATL52-like; Ring finger protein (344 aa)
PGSC0003DMT400045666	Inactive tpr repeat-containing thioredoxin ttl3-like; Heat shock protein binding protein (545 aa)
PGSC0003DMT400057917	Carboxylesterase 1-like; Uncharacterized protein; Gibberellin receptor GID1 (328 aa)
PGSC0003DMT400060128	Transcription repressor ofp13-like; Uncharacterized protein; Conserved gene of unknown function (233 aa)
PGSC0003DMT400037285	Light-harvesting complex i chlorophyll a/b binding protein 2; Chlorophyll a-b binding protein, chloroplastic; The light-harvesting complex (LHC) functions as a light receptor, it captures and delivers excitation energy to photosystems with which it is closely associated (156 aa)
PGSC0003DMT400001570	Naringenin,2-oxoglutarate 3-dioxygenase-like; Uncharacterized protein; 1-aminocyclopropane-1-carboxylate oxidase; Belongs to the iron/ascorbate-dependent oxidoreductase family (337 aa)
PGSC0003DMT400020634	Uncharacterized loc102582097; Uncharacterized protein; Pheromone receptor (319 aa)
PGSC0003DMT400002112	Protein chup1, chloroplastic; Uncharacterized protein; CHUP1 (CHLOROPLAST UNUSUAL POSITIONING 1) (991 aa)
PGSC0003DMT400003025	Uncharacterized protein; Basic 7S globulin 2 small subunit; Belongs to the peptidase A1 family (430 aa)
PGSC0003DMT400073345	Uncharacterized protein; Conserved gene of unknown function; Belongs to the iron/ascorbate-dependent oxidoreductase family (355 aa)
PGSC0003DMT400050509	Putative late blight resistance protein homolog r1b-17; Disease resistance protein Gpa2; Belongs to the disease resistance NB-LRR family (876 aa)
PGSC0003DMT400082426	Uncharacterized loc102598426; Uncharacterized protein; Conserved gene of unknown function (243 aa)
PGSC0003DMT400012364	Fatty acid omega-hydroxy dehydrogenase; Uncharacterized protein; Glucose-methanol-choline (Gmc) oxidoreductase; Belongs to the GMC oxidoreductase family (599 aa)
PGSC0003DMT400016361	Putative pentatricopeptide repeat-containing protein at5g52630; Pentatricopeptide repeat-containing protein (755 aa)
PGSC0003DMT400018560	Alpha-l-arabinofuranosidase 1-like; Uncharacterized protein; Arabinosidase ARA-1 (622 aa)
PGSC0003DMT400052884	Aluminum-activated malate transporter 12-like; Uncharacterized protein; Conserved gene of unknown function (538 aa)
PGSC0003DMT400012303	Inositol 2-dehydrogenase/d-chiro-inositol 3-dehydrogenase; Uncharacterized protein; Oxidoreductase (375 aa)
PGSC0003DMT400084308	Carboxyl-terminal-processing peptidase 3, chloroplastic; Peptidase S41 family protein (496 aa)
POPA	Suberization-associated anionic peroxidase; Removal of H(2)O(2), oxidation of toxic reductants, biosynthesis and degradation of lignin, suberization, auxin catabolism, response to environmental stresses such as wounding, pathogen attack and oxidative stress. These functions might be dependent on each isozyme/isoform in each plant tissue (363 aa)
PGSC0003DMT400058545	Probable (s)-n-methylcoclaurine 3'-hydroxylase isozyme 2; Belongs to the cytochrome P450 family (495 aa)
PGSC0003DMT400066576	Scopoletin glucosyltransferase-like; Glycosyltransferase; Phenylpropanoid:glucosyltransferase 1; Belongs to the UDP-glycosyltransferase family (454 aa)
PGSC0003DMT400008870	Tmv resistance protein n-like; Disease resistance protein (1141 aa)
PGSC0003DMT400077934	Zinc finger protein zat11-like; Uncharacterized protein; ZPT2-12 (164 aa)
PGSC0003DMT400006132	Protein stay-green like, chloroplastic; Uncharacterized protein; Conserved gene of unknown function (250 aa)
PGSC0003DMT400008336	Leucine-rich repeat receptor-like protein kinase pepr1; Leucine Rich Repeat family protein; Belongs to the protein kinase superfamily. Ser/Thr protein kinase family (1115 aa)
PGSC0003DMT400007731	Putative axial regulator yabby 2; FAS protein (178 aa)
PGSC0003DMT400030168	Zinc finger protein zat10-like; Zinc finger DNA-binding protein (209 aa)
PGSC0003DMT400077956	Uncharacterized protein; GTP1/OBG family member (711 aa)
PGSC0003DMT400035019	Uncharacterized loc107062266; Uncharacterized protein; Conserved gene of unknown function (140 aa)
PGSC0003DMT400079832	Casp-like protein 2a1; UPF0497 membrane protein 11; Belongs to the Casparian strip membrane proteins (CASP) family (195 aa)
PGSC0003DMT400006657	Uncharacterized protein; RNA binding protein (254 aa)
PGSC0003DMT400037788	Uncharacterized loc102605716; Uncharacterized protein; Conserved gene of unknown function (121 aa)
PGSC0003DMT400055751	Mitogen-activated protein kinase homolog mmk2-like; Belongs to the protein kinase superfamily. Ser/Thr protein kinase family. MAP kinase subfamily (376 aa)
PGSC0003DMT400059046	Uncharacterized protein; Auxin-induced beta-glucosidase (773 aa)
PGSC0003DMT400061767	Methionine aminotransferase-like; Uncharacterized protein; Aminotransferase ybdL (404 aa)
PGSC0003DMT400034893	Light-harvesting complex ii chlorophyll a/b binding protein 1; Chlorophyll a-b binding protein, chloroplastic; The light-harvesting complex (LHC) functions as a light receptor, it captures and delivers excitation energy to photosystems with which it is closely associated (262 aa)
PGSC0003DMT400093456	UPF0496 protein At1g20180-like; Isoform 2 of UPF0496 protein (370 aa)
PGSC0003DMT400044444	Beta-d-glucosyl crocetin beta-1,6-glucosyltransferase-like; Uncharacterized protein; Glucosyl/glucuronosyl transferases; Belongs to the UDP-glycosyltransferase family (351 aa)
PGSC0003DMT400023104	1-aminocyclopropane-1-carboxylate oxidase homolog 1-like; Uncharacterized protein; Desacetoxyvindoline 4-hydroxylase; Belongs to the iron/ascorbate-dependent oxidoreductase family (360 aa)
PGSC0003DMT400013037	Uncharacterized protein; Beta-glucosidase; Belongs to the glycosyl hydrolase 1 family (416 aa)
PGSC0003DMT400028188	Hippocampus abundant transcript-like protein 1; Uncharacterized protein; Tetracycline transporter (444 aa)
PGSC0003DMT400015477	E3 ubiquitin-protein ligase ATL10/75/76/77/78; RING-H2 finger protein ATL1L (215 aa)
PGSC0003DMT400033010	Probable carboxylesterase 17; Uncharacterized protein; Lipase (331 aa)
PGSC0003DMT400077668	Probable chlorophyll(ide) b reductase nyc1, chloroplastic; Uncharacterized protein; Chlorophyll b reductase (486 aa)
PGSC0003DMT400009693	Uncharacterized protein; Conserved gene of unknown function (195 aa)
PGSC0003DMT400003302	Inositol hexakisphosphate and diphosphoinositol-pentakisphosphate kinase 2; Uncharacterized protein; Histidine acid phosphatase; Belongs to the histidine acid phosphatase family (1085 aa)
PGSC0003DMT400009609	BEL1-like homeodomain protein 11; Bell-like homeodomain protein 1 (423 aa)
PGSC0003DMT400020516	Uncharacterized loc102586071; Uncharacterized protein; Conserved gene of unknown function (354 aa)
PGSC0003DMT400072865	Serine/threonine-protein kinase sty8; Integrin-linked protein kinase; Belongs to the protein kinase superfamily (435 aa)
PGSC0003DMT400063901	Uncharacterized protein; DNAJ heat shock N-terminal domain-containing protein (345 aa)
AGPS3	Glucose-1-phosphate adenylyltransferase large subunit 3, chloroplastic/amyloplastic; This protein plays a role in synthesis of starch. It catalyzes the synthesis of the activated glycosyl donor, ADP- glucose from Glc-1-P and ATP (515 aa)
PGSC0003DMT400043270	Abc transporter g family member 11-like; Uncharacterized protein; ATP-binding cassette transporter (652 aa)
PGSC0003DMT400057709	Mfs transporter, sp family, sugar:h+ symporter; Uncharacterized protein; Hexose transporter 1; Belongs to the major facilitator superfamily. Sugar transporter (TC 2.A.1.1) family (523 aa)
PGSC0003DMT400040295	N-hydroxythioamide s-beta-glucosyltransferase; Uncharacterized protein; UDP-glucose:glucosyltransferase (469 aa)
PGSC0003DMT400081453	Probable membrane-associated kinase regulator 1; Uncharacterized protein; Conserved gene of unknown function (341 aa)
PGSC0003DMT400053473	Uncharacterized protein; Late blight resistance protein Rpi-blb2; Belongs to the disease resistance NB-LRR family (831 aa)
PGSC0003DMT400012997	Transcription factor bhlh112-like; Uncharacterized protein; Transcription factor (335 aa)
PGSC0003DMT400023432	Rna polymerase sigma factor sige, chloroplastic/mitochondrial; Uncharacterized protein; RNA polymerase sigma factor rpoD (516 aa)
PGSC0003DMT400076418	Heat shock transcription factor, other eukaryote; DNA binding protein (201 aa)
PGSC0003DMT400080925	Cytochrome p450 83b1-like; Belongs to the cytochrome P450 family (497 aa)
PGSC0003DMT400060374	Probable pectate lyase 13; Pectate lyase (571 aa)
PGSC0003DMT400022072	Light-harvesting complex ii chlorophyll a/b binding protein 3; Chlorophyll a-b binding protein, chloroplastic; The light-harvesting complex (LHC) functions as a light receptor, it captures and delivers excitation energy to photosystems with which it is closely associated (265 aa)
PGSC0003DMT400048484	Uncharacterized loc102594065; Uncharacterized protein; Conserved gene of unknown function (115 aa)
PGSC0003DMT400072153	Probable zinc metalloprotease egy2, chloroplastic; Uncharacterized protein; Metalloendopeptidase (485 aa)
PGSC0003DMT400017363	Putative germin-like protein 2-1; Uncharacterized protein; Germin 12 (225 aa)
PGSC0003DMT400039734	Protochlorophyllide reductase-like; Phototransformation of protochlorophyllide (Pchlide) to chlorophyllide (Chlide) (397 aa)
PGSC0003DMT400049257	Uncharacterized loc102596768; Uncharacterized protein; Conserved gene of unknown function (128 aa)
PGSC0003DMT400033701	Cytochrome p450 cyp736a12-like; Belongs to the cytochrome P450 family (493 aa)
PGSC0003DMT400000291	Protein trichome birefringence-like 25; Uncharacterized protein; Conserved gene of unknown function (440 aa)
PGSC0003DMT400024317	Uncharacterized protein; Glutaredoxin-C9 (150 aa)
PGSC0003DMT400047760	Alcohol dehydrogenase-like; Uncharacterized protein; Alcohol dehydrogenase (374 aa)
PGSC0003DMT400055085	Uncharacterized loc102594000; Uncharacterized protein; Conserved gene of unknown function (159 aa)
PGSC0003DMT400030683	Uncharacterized protein; Gamma aminobutyrate transaminase isoform1; Belongs to the class-III pyridoxal-phosphate-dependent aminotransferase family (515 aa)
PGSC0003DMT400062058	Non-functional pseudokinase zed1-like; Serine-threonine protein kinase, plant-type (170 aa)
PGSC0003DMT400043500	Probable 1-acyl-sn-glycerol-3-phosphate acyltransferase 4; Uncharacterized protein; 1-acyl-sn-glycerol-3-phosphate acyltransferase 4 (271 aa)
PGSC0003DMT400036885	Probable e3 ubiquitin-protein ligase rnf217; Zinc finger protein (163 aa)
PGSC0003DMT400019000	Uncharacterized protein; Sugar transporter; Belongs to the major facilitator superfamily. Sugar transporter (TC 2.A.1.1) family (426 aa)
PGSC0003DMT400033215	Protein little zipper 2-like; Uncharacterized protein; Conserved gene of unknown function (114 aa)
PGSC0003DMT400076223	Uncharacterized protein; Transcription factor FAMA (285 aa)
Peroxygenase-like	Uncharacterized protein; Caleosin (243 aa)
PGSC0003DMT400025169	Probable peroxygenase 5; Calcium ion binding protein (191 aa)
PGSC0003DMT400070684	Xylose isomerase (481 aa)
PGSC0003DMT400075091	Uncharacterized protein; WRKY transcription factor 6 (293 aa)
PGSC0003DMT400027885	Uncharacterized loc102595495; Uncharacterized protein; Prenyl-dependent CAAX protease (324 aa)
PGSC0003DMT400040204	Dirigent protein 25-like; Dirigent protein; Dirigent proteins impart stereoselectivity on the phenoxy radical-coupling reaction, yielding optically active lignans from two molecules of coniferyl alcohol in the biosynthesis of lignans, flavonolignans, and alkaloids and thus plays a central role in plant secondary metabolism (336 aa)
PGSC0003DMT400053322	Uncharacterized loc102602333; Uncharacterized protein; Gene of unknown function (399 aa)
PGSC0003DMT400058744	Uncharacterized protein; GDSL esterase/lipase; Belongs to the 'GDSL' lipolytic enzyme family (364 aa)
PGSC0003DMT400076046	Uncharacterized protein at4g15970-like; Pentatricopeptide repeat-containing protein (395 aa)
PGSC0003DMT400049498	Uncharacterized protein; Beta-glucosidase 41; Belongs to the glycosyl hydrolase 1 family (529 aa)
PGSC0003DMT400023222	Uncharacterized loc102594885; Uncharacterized protein; Conserved gene of unknown function (129 aa)
PGSC0003DMT400091896	Zinc finger protein zat10-like; Zinc-finger protein (190 aa)
PGSC0003DMT400033751	Plastid-specific 30S ribosomal protein 3, chloroplast (167 aa)
PGSC0003DMT400035714	Disease resistance protein at4g27190-like; BED finger-nbs-lrr resistance protein; Belongs to the disease resistance NB-LRR family (898 aa)
PGSC0003DMT400036081	Uncharacterized protein; 1-aminocyclopropane-1-carboxylate oxidase 2; Belongs to the iron/ascorbate-dependent oxidoreductase family (316 aa)
Fimbrin-2-like	Uncharacterized protein; Fimbrin (663 aa)
PGSC0003DMT400078172	Probable serine/threonine-protein kinase clka; Uncharacterized protein; Conserved gene of unknown function (268 aa)
PGSC0003DMT400017897	RING-H2 finger protein ATL3-like; Zinc finger protein (236 aa)
PGSC0003DMT400078809	Uncharacterized protein; EPIDERMAL PATTERNING FACTOR 2 (128 aa)
PGSC0003DMT400075340	Abscisic acid receptor pyr/pyl family; Bet v I allergen family protein (190 aa)
PGSC0003DMT400020922	Uncharacterized protein; KiTH-2 (212 aa)
PGSC0003DMT400048344	12-oxophytodienoate reductase 1-like; LEDI-5c protein (374 aa)
PGSC0003DMT400000864	Uncharacterized loc102596339; Ultraviolet-B-repressible protein (119 aa)
PGSC0003DMT400016306	Ethylene-responsive transcription factor abr1-like; Uncharacterized protein; AP2/ERF domain-containing transcription factor (441 aa)
PGSC0003DMT400011206	Uncharacterized protein; Conserved gene of unknown function (191 aa)
PGSC0003DMT400069753	Transcription factor divaricata-like; DIV2B protein (248 aa)
PGSC0003DMT400007963	Uncharacterized protein; Leucoanthocyanidin dioxygenase; Belongs to the iron/ascorbate-dependent oxidoreductase family (366 aa)
PGSC0003DMT400057281	Photosystem i reaction center subunit v, chloroplastic; Uncharacterized protein; Chloroplast photosystem I reaction center V (146 aa)
PGSC0003DMT400008581	Uncharacterized protein; Conserved gene of unknown function (335 aa)
PGSC0003DMT400077419	Uncharacterized protein; Leucine-rich repeat receptor kinase (583 aa)
PGSC0003DMT400052282	Uncharacterized loc102598030; Uncharacterized protein; Conserved gene of unknown function (193 aa)
PGSC0003DMT400041332	Glycine-rich cell wall structural protein 2-like; ATP binding protein (127 aa)
PGSC0003DMT400057320	Probable galactinol--sucrose galactosyltransferase 1; Uncharacterized protein; Alkaline alpha-galactosidase seed imbibition protein (756 aa)
PGSC0003DMT400079415	Udp-sugar transporter sqv-7-like; Uncharacterized protein; UDP-sugar transporter (335 aa)
PGSC0003DMT400056344	Probable 6-phosphogluconolactonase 2; Belongs to the glucosamine/galactosamine-6-phosphate isomerase family. 6-phosphogluconolactonase subfamily (266 aa)
PGSC0003DMT400008721	Late blight resistance protein homolog R1A-4; Belongs to the disease resistance NB-LRR family (898 aa)
PGSC0003DMT400002892	Phosphatidate cytidylyltransferase 1-like; Uncharacterized protein; Phosphatidate cytidylyltransferase (110 aa)
PGSC0003DMT400082124	Uncharacterized loc102603793; Uncharacterized protein; Conserved gene of unknown function (188 aa)
PGSC0003DMT400047982	Serine/threonine-protein kinase sty46; Protein kinase (564 aa)
PGSC0003DMT400087625	Uncharacterized protein; Kinesin heavy chain (403 aa)
PGSC0003DMT400052335	Glycerol-3-phosphate 2-O-acyltransferase 6; Uncharacterized protein; Glycerol-3-phosphate acyltransferase 6 (506 aa)
PGSC0003DMT400078803	Uncharacterized protein at5g65660; Hydroxyproline-rich glycoprotein (154 aa)
PGSC0003DMT400056527	Ethylene-responsive transcription factor lep-like; DNA binding protein (160 aa)
PGSC0003DMT400069734	Abscisic acid receptor pyr/pyl family; Uncharacterized protein; Abscisic acid receptor PYL4 (208 aa)
PGSC0003DMT400072539	Uncharacterized protein; Ubiquitin carboxyl-terminal hydrolase; Belongs to the peptidase C19 family (1122 aa)
PGSC0003DMT400007537	Receptor-like protein 12; Uncharacterized protein; Cf-2.1 (889 aa)
PGSC0003DMT400004660	Uncharacterized protein; Major pollen allergen Ory s 1; Belongs to the expansin family (255 aa)
PGSC0003DMT400025724	Uncharacterized loc102591626; Uncharacterized protein; MRNA, 952 bp sequence (196 aa)
PGSC0003DMT400053117	Uncharacterized protein; MLO1 (366 aa)
PGSC0003DMT400026813	Lrr receptor-like serine/threonine-protein kinase fls2; Serine-threonine protein kinase, plant-type (998 aa)
PGSC0003DMT400046956	Fibrous sheath cabyr-binding protein; GRIP and coiled-coil domain-containing protein (781 aa)
PGSC0003DMT400033777	Uncharacterized loc107058868; VQ motif-containing protein (203 aa)
PGSC0003DMT400071094	Uncharacterized protein; Gibberellin 2-oxidase; Belongs to the iron/ascorbate-dependent oxidoreductase family (368 aa)
PGSC0003DMT400013991	Probable lrr receptor-like serine/threonine-protein kinase at3g47570; Uncharacterized protein; Receptor-kinase (750 aa)
PGSC0003DMT400043300	Tmv resistance protein n-like; Belongs to the disease resistance NB-LRR family (1065 aa)
PGSC0003DMT400011772	Uncharacterized protein; Fip1 motif-containing protein (1130 aa)
PGSC0003DMT400015693	Zinc finger ccch domain-containing protein 18; RNA binding protein (559 aa)
PGSC0003DMT400004981	Probable carotenoid cleavage dioxygenase 4, chloroplastic; Uncharacterized protein; Carotenoid cleavage dioxygenase 4 (591 aa)
PGSC0003DMT400078690	Uncharacterized protein; Chromosome-associated kinesin KIF4A; Belongs to the TRAFAC class myosin-kinesin ATPase superfamily. Kinesin family (498 aa)
PGSC0003DMT400053226	Serine/threonine-protein kinase prpf4b-like; Protein kinase domain containing protein (836 aa)
PGSC0003DMT400000801	Uncharacterized loc102604206; Senescence-associated protein (366 aa)
PGSC0003DMT400076662	Mterf domain-containing protein, mitochondrial; Uncharacterized protein; Mitochondrial transcription termination factor family protein / mTERF family protein (292 aa)
PGSC0003DMT400018621	Subtilisin-like protease sbt5.3; Belongs to the peptidase S8 family (775 aa)
Myosin-2-like	Uncharacterized protein; Myosin VIII-B; Belongs to the TRAFAC class myosin-kinesin ATPase superfamily. Myosin family (592 aa)
PGSC0003DMT400031362	Uncharacterized protein; DC1.2 homologue (203 aa)
PGSC0003DMT400055829	E3 ubiquitin-protein ligase RMA1H1-like; E3 ubiquitin-protein ligase RMA1H1 (223 aa)
PGSC0003DMT400040161	3,4-dihydroxy 2-butanone 4-phosphate synthase / GTP cyclohydrolase II; Uncharacterized protein; GTP cyclohydrolase II (520 aa)
PGSC0003DMT400054970	Glutaredoxin domain-containing cysteine-rich protein 1; Uncharacterized protein; Electron transporter (244 aa)
PGSC0003DMT400081921	Protein plant cadmium resistance 2-like; Uncharacterized protein; Conserved gene of unknown function (164 aa)
PGSC0003DMT400007125	Alkaline/neutral invertase a, mitochondrial-like; Uncharacterized protein; Beta-fructofuranosidase (619 aa)
PGSC0003DMT400015397	Tmv resistance protein n-like; Uncharacterized protein; Nematode resistance (1239 aa)
PGSC0003DMT400028799	Uncharacterized loc102585649; NtEIG-E80 protein (186 aa)
PGSC0003DMT400049377	Auxin influx carrier (aux1 lax family); Auxin influx transport protein (485 aa)
PGSC0003DMT400021089	Heat shock transcription factor, other eukaryote; Uncharacterized protein; AT-HSFB3 (Arabidopsis thaliana heat shock transcription factor B3) (244 aa)
PGSC0003DMT400049803	Heat stress transcription factor a-7a-like; DNA binding protein (106 aa)
PGSC0003DMT400047335	Uncharacterized loc102579566; Uncharacterized protein; Conserved gene of unknown function (68 aa)
PGSC0003DMT400081430	Putative hydrolase of the had superfamily; Protein SSM1 (256 aa)
PGSC0003DMT400046038	Putative receptor-like protein kinase at3g47110; Serine-threonine protein kinase, plant-type; Belongs to the protein kinase superfamily. Ser/Thr protein kinase family (1095 aa)
PGSC0003DMT400097584	Uncharacterized loc102597550; ATP binding protein (368 aa)
PGSC0003DMT400073008	Uncharacterized protein; Phosphate transporter PHO1 homolog 10 (780 aa)
PGSC0003DMT400026862	Replication protein a 70 kda dna-binding subunit b-like; Replication factor A protein (186 aa)
PGSC0003DMT400033541	Probable transmembrane gtpase fzo-like, chloroplastic; Uncharacterized protein; FZL (192 aa)
PGSC0003DMT400033879	Uncharacterized protein; Sigma factor sigb regulation protein rsbq (270 aa)
PGSC0003DMT400006305	Uncharacterized protein; Beta-glucosidase 18; Belongs to the glycosyl hydrolase 1 family (538 aa)
PGSC0003DMT400002570	Very-long-chain enoyl-coa reductase-like; Uncharacterized protein; 3-oxo-5-alpha-steroid 4-dehydrogenase family protein (266 aa)
STACS5	1-aminocyclopropane-1-carboxylate synthase 1/2/6; Uncharacterized protein; ACC synthase (486 aa)
PGSC0003DMT400071334	Casp-like protein pimp1; UPF0497 membrane protein PIMP1; Belongs to the Casparian strip membrane proteins (CASP) family (168 aa)
PGSC0003DMT400037472	Protein c2-domain aba-related 4-like; Pollen-specific C2 domain containing protein (181 aa)
PGSC0003DMT400018769	Uncharacterized protein; Heat shock protein DnaJ, N-terminal (105 aa)
PGSC0003DMT400030976	Alanine-glyoxylate transaminase / (r)-3-amino-2-methylpropionate-pyruvate transaminase; Uncharacterized protein; Alanine-glyoxylate aminotransferase; Belongs to the class-III pyridoxal-phosphate-dependent aminotransferase family (478 aa)
PGSC0003DMT400021739	Uncharacterized loc107058651; Metal ion binding protein (363 aa)
PGSC0003DMT400019129	Fatty acyl-CoA reductase; Catalyzes the reduction of fatty acyl-CoA to fatty alcohols (401 aa)
PGSC0003DMT400021080	Tag lipase / steryl ester hydrolase / phospholipase a2 / lpa acyltransferase; Uncharacterized protein; Triacylglycerol lipase SDP1 (816 aa)
PGSC0003DMT400077008	Abscisic acid receptor pyr/pyl family; Bet v I allergen family protein (188 aa)
PGSC0003DMT400003985	Phosphatidylinositol 4-phosphatase; Uncharacterized protein; SAC (595 aa)
PGSC0003DMT400036918	Glutamyl-trna(gln) amidotransferase subunit a; Uncharacterized protein; Amidase (624 aa)
PGSC0003DMT400007904	Ethylene-responsive proteinase inhibitor 1 (118 aa)
PGSC0003DMT400078644	7-deoxyloganetic acid glucosyltransferase-like; Glycosyltransferase; Conserved gene of unknown function; Belongs to the UDP-glycosyltransferase family (489 aa)
PGSC0003DMT400068381	Uncharacterized loc102601330; Uncharacterized protein; Conserved gene of unknown function (147 aa)
PGSC0003DMT400061517	Protein reticulata-related 5, chloroplastic; Uncharacterized protein; Conserved gene of unknown function (747 aa)
PGSC0003DMT400045772	Uncharacterized protein; Purine transporter (318 aa)
PGSC0003DMT400001532	Uncharacterized loc102602042; Uncharacterized protein; Electron transporter (278 aa)
PGSC0003DMT400018826	Transcription factor upbeat1; Uncharacterized protein; Transcription factor (117 aa)
PGSC0003DMT400053742	Probable lrr receptor-like serine/threonine-protein kinase at3g47570; Serine-threonine protein kinase, plant-type; Belongs to the protein kinase superfamily. Ser/Thr protein kinase family (1082 aa)
Pain-1	Beta-fructofuranosidase; Vacuolar invertase; Belongs to the glycosyl hydrolase 32 family (639 aa)
PGSC0003DMT400037761	Uncharacterized loc102603928; Uncharacterized protein; Conserved gene of unknown function (671 aa)
PGSC0003DMT400081225	Pentatricopeptide repeat-containing protein at5g46100; Uncharacterized protein; Pentatricopeptide repeat (479 aa)
PGSC0003DMT400076858	Premnaspirodiene oxygenase-like; Belongs to the cytochrome P450 family (503 aa)
EXLA1	Uncharacterized protein; Expansin; Belongs to the expansin family (260 aa)
PGSC0003DMT400078477	Transcription factor myb, plant; Uncharacterized protein; Myb-like transcription factor 6 (178 aa)
PGSC0003DMT400082122	Uncharacterized n-acetyltransferase p20-like; Uncharacterized protein; N-acetyltransferase (186 aa)
PGSC0003DMT400075880	Xyloglucan endotransglucosylase/hydrolase; Catalyzes xyloglucan endohydrolysis (XEH) and/or endotransglycosylation (XET). Cleaves and religates xyloglucan polymers, an essential constituent of the primary cell wall, and thereby participates in cell wall construction of growing tissues; Belongs to the glycosyl hydrolase 16 family (330 aa)
PGSC0003DMT400043166	Lipoxygenase homology domain-containing protein 1-like; TMV-induced protein I (183 aa)
PGSC0003DMT400016381	Uncharacterized loc102605844; Uncharacterized protein; Conserved gene of unknown function (187 aa)
Prosaposin-like	Uncharacterized protein; Conserved gene of unknown function (242 aa)
PGSC0003DMT400055203	Uncharacterized protein; 1-aminocyclopropane-1-carboxylate synthase 3 (469 aa)
PGSC0003DMT400054830	Uncharacterized loc102598893; Uncharacterized protein; Conserved gene of unknown function (287 aa)
PGSC0003DMT400027228	Uncharacterized protein; Gene of unknown function (112 aa)
PGSC0003DMT400016296	Cytochrome p450 71a1-like; Belongs to the cytochrome P450 family (506 aa)
PGSC0003DMT400075266	Protein tic 55, chloroplastic; Uncharacterized protein; Chlorophyll a oxygenase (549 aa)
PGSC0003DMT400062895	Uncharacterized loc102585796; Uncharacterized protein; Conserved gene of unknown function (576 aa)
PGSC0003DMT400027293	Uncharacterized protein; DNA binding protein (235 aa)
PGSC0003DMT400022055	Uncharacterized loc102586001; Uncharacterized protein; Conserved gene of unknown function (138 aa)
PGSC0003DMT400021519	Uncharacterized protein at1g28695-like; Pentatricopeptide repeat-containing protein (340 aa)
PGSC0003DMT400054480	Photosystem i reaction center subunit iii, chloroplastic-like; Uncharacterized protein; Photosystem I subunit III (228 aa)
PGSC0003DMT400022108	Abc transporter c family member 5; Multidrug resistance protein ABC transporter family (1531 aa)
PGSC0003DMT400032791	Light-harvesting complex ii chlorophyll a/b binding protein 6; Chlorophyll a-b binding protein, chloroplastic; The light-harvesting complex (LHC) functions as a light receptor, it captures and delivers excitation energy to photosystems with which it is closely associated (256 aa)
PGSC0003DMT400015016	Beta-carotene isomerase d27, chloroplastic; Uncharacterized protein; Conserved gene of unknown function (270 aa)
PGSC0003DMT400034897	Light-harvesting complex ii chlorophyll a/b binding protein 1; Chlorophyll a-b binding protein, chloroplastic; The light-harvesting complex (LHC) functions as a light receptor, it captures and delivers excitation energy to photosystems with which it is closely associated (262 aa)
PGSC0003DMT400065889	Carboxymethylenebutenolidase homolog; Uncharacterized protein; Hydrolase (303 aa)
CKX4	Uncharacterized protein; Cytokinin oxidase/dehydrogenase (526 aa)
PGSC0003DMT400050511	Transcription repressor ofp6; Uncharacterized protein; ATOFP6/OFP6 (139 aa)
PGSC0003DMT400071608	J domain-containing protein required for chloroplast accumulation response 1; Heat shock protein binding protein (698 aa)
PGSC0003DMT400083213	Uncharacterized loc102598094; RING zinc finger protein (151 aa)
PGSC0003DMT400023981	Transcription factor tcp23-like; Uncharacterized protein; Transcription factor (389 aa)
PGSC0003DMT400032715	Uncharacterized loc102583974; Uncharacterized protein; Conserved gene of unknown function (668 aa)
PGSC0003DMT400018222	Cytochrome p450 cyp72a219-like; Uncharacterized protein; CYP72A58 (519 aa)
PGSC0003DMT400043228	Geraniol 8-hydroxylase-like; Belongs to the cytochrome P450 family (501 aa)
PGSC0003DMT400040569	Hmg-y-related protein a-like; High mobility group protein (160 aa)
PGSC0003DMT400017416	Uncharacterized protein; MADS-box protein 9 (287 aa)
PGSC0003DMT400037456	Non-structural maintenance of chromosomes element 4 homolog a-like; Uncharacterized protein; Non-structural maintenance of chromosome element (377 aa)
PGSC0003DMT400016212	Uncharacterized loc107060464; Uncharacterized protein; N-acetyltransferase (170 aa)
PGSC0003DMT400053084	Uncharacterized protein; Caryophyllene/alpha-humulene synthase (475 aa)
PGSC0003DMT400054943	Digalactosyldiacylglycerol synthase 1, chloroplastic-like; Uncharacterized protein; Digalactosyldiacylglycerol synthase 1 (774 aa)
PGSC0003DMT400049531	Uncharacterized loc102593298; Belongs to the protein kinase superfamily. Ser/Thr protein kinase family (810 aa)
PGSC0003DMT400077768	Probable s-adenosylmethionine-dependent methyltransferase at5g38100; Uncharacterized protein; Conserved gene of unknown function (346 aa)
PGSC0003DMT400019932	Uncharacterized loc102599795; Uncharacterized protein; Conserved gene of unknown function (295 aa)
PGSC0003DMT400016670	Uncharacterized protein; RNase H family protein (360 aa)
PGSC0003DMT400075002	Uncharacterized loc102586402; Uncharacterized protein; Conserved gene of unknown function (351 aa)
PGSC0003DMT400075598	PsbP domain-containing protein 3, chloroplastic (260 aa)
PGSC0003DMT400054816	Probable aminotransferase tat2; Aminotransferase family protein (421 aa)
Endo-1,3;1,4-beta-D-glucanase-like	Endo-1,3;1,4-beta-D-glucanase-like; Uncharacterized protein; Endo-1,3-1,4-beta-d-glucanase (239 aa)
PGSC0003DMT400066161	Btb/poz domain-containing protein npy2; Uncharacterized protein; Signal transducer; Belongs to the NPH3 family (626 aa)
PGSC0003DMT400033014	Rhomboid-like protein 9, chloroplastic; Rhomboid family protein (419 aa)
PGSC0003DMT400038285	Tyramine n-feruloyltransferase 4/11-like; Uncharacterized protein; Tyramine hydroxycinnamoyl transferase (243 aa)
PGSC0003DMT400079988	Uncharacterized loc102605236; Uncharacterized protein; Conserved gene of unknown function (262 aa)
PGSC0003DMT400057099	Abc transporter c family member 3; Multidrug resistance protein ABC transporter family (1320 aa)
PGSC0003DMT400080487	Mterf domain-containing protein, mitochondrial; Uncharacterized protein; MTERF (310 aa)
PGSC0003DMT400081450	2-hydroxyisoflavanone dehydratase-like; Uncharacterized protein; 2-Hydroxyisoflavanone dehydratase (328 aa)
PGSC0003DMT400051561	Organ-specific protein s2-like; Specific tissue protein 2 (160 aa)
PGSC0003DMT400042837	Geraniol 8-hydroxylase-like; Belongs to the cytochrome P450 family (492 aa)
PGSC0003DMT400036896	Uncharacterized loc102599223; Uncharacterized protein; Conserved gene of unknown function (369 aa)
PGSC0003DMT400009949	Ring finger and chy zinc finger domain-containing protein 1; Uncharacterized protein; PGPD14 (288 aa)
PGSC0003DMT400031704	Uncharacterized loc102598350; Uncharacterized protein; Conserved gene of unknown function (107 aa)
petC	Cytochrome b6-f complex iron-sulfur subunit, chloroplastic; Component of the cytochrome b6-f complex, which mediates electron transfer between photosystem II (PSII) and photosystem I (PSI), cyclic electron flow around PSI, and state transitions (230 aa)
PGSC0003DMT400076811	Gdsl esterase/lipase exl3-like; Uncharacterized protein; Conserved gene of unknown function (212 aa)
PGSC0003DMT400078616	Uncharacterized loc102602533; Uncharacterized protein; Conserved gene of unknown function (181 aa)
PGSC0003DMT400076556	Serine carboxypeptidase-like clade ii; Serine carboxypeptidase; Belongs to the peptidase S10 family (478 aa)
PGSC0003DMT400049901	Uncharacterized loc107059761; Uncharacterized protein; Endonuclease-reverse transcriptase HmRTE-e01 (866 aa)
PGSC0003DMT400031722	GDT1-like protein 1, chloroplastic; UPF0016 protein 1, chloroplastic (361 aa)
PGSC0003DMT400062389	Uncharacterized loc102590516; Uncharacterized protein; Conserved gene of unknown function (149 aa)
PGSC0003DMT400039817	Probable lrr receptor-like serine/threonine-protein kinase at1g53430; Leucine-rich repeat family protein / protein kinase family protein (627 aa)
PGSC0003DMT400013151	Uncharacterized protein at1g01500-like; Uncharacterized protein; 2-hydroxyacid dehydrogenase (306 aa)
PGSC0003DMT400049793	Heat shock transcription factor, other eukaryote; DNA binding protein (364 aa)
PGSC0003DMT400028260	Uncharacterized loc102583946; Uncharacterized protein; Transcription factor (760 aa)
PGSC0003DMT400048068	Probable l-type lectin-domain containing receptor kinase s.5; Uncharacterized protein; Lectin kinase (676 aa)
PGSC0003DMT400077488	Mlo-like protein 6; MLO-like protein; May be involved in modulation of pathogen defense and leaf cell death (589 aa)
PGSC0003DMT400095159	Stearoyl-[acyl-carrier-protein] 9-desaturase 6, chloroplastic-like; Acyl-[acyl-carrier-protein] desaturase (384 aa)
PGSC0003DMT400052233	Putative calcium-binding protein cml19; Uncharacterized protein; Polcalcin Jun o (141 aa)
PGSC0003DMT400076213	F-box protein pp2-b1-like; F-box family protein (233 aa)
PGSC0003DMT400077644	F-box/kelch-repeat protein at3g06240-like; Ubiquitin-protein ligase (378 aa)
PGSC0003DMT400049395	Fructose-1,6-bisphosphatase, chloroplastic-like; Uncharacterized protein; Fructose-1,6-bisphosphatase; Belongs to the FBPase class 1 family (408 aa)
PGSC0003DMT400048565	F-box/lrr-repeat protein at3g26922-like; F-box family protein (286 aa)
PGSC0003DMT400032865	Uncharacterized loc102590240; Uncharacterized protein; Conserved gene of unknown function (192 aa)
PGSC0003DMT400021923	Auxin influx carrier (aux1 lax family); Auxin influx transport protein (481 aa)
PGSC0003DMT400081787	Uncharacterized loc102590017; Binding protein (325 aa)
PGSC0003DMT400033905	2-oxoisovalerate dehydrogenase subunit alpha 1, mitochondrial-like; Uncharacterized protein; Branched chain alpha-keto acid dehydrogenase E1-alpha subunit (456 aa)
PGSC0003DMT400060669	Uncharacterized loc102584063; Uncharacterized protein; Conserved gene of unknown function (328 aa)
PGSC0003DMT400002556	Uncharacterized loc102596661; Binding protein (429 aa)
PGSC0003DMT400078753	Uncharacterized loc107062687; Uncharacterized protein; Conserved gene of unknown function (145 aa)
PGSC0003DMT400055763	Transcription factor myb, plant; Uncharacterized protein; R2r3-myb transcription factor (319 aa)
PGSC0003DMT400040062	Peroxidase 72-like; Pericarp peroxidase 3; Belongs to the peroxidase family. Classical plant (class III) peroxidase subfamily (331 aa)
STBRC1B	Tcp transcription factor brc1b; TCP protein (279 aa)
PGSC0003DMT400005492	Protein plastid transcriptionally active 16, chloroplastic; Uncharacterized protein; PTAC16 (495 aa)
PGSC0003DMT400065720	Uncharacterized protein at4g14100-like; Uncharacterized protein; Transferase, transferring glycosyl groups (213 aa)
PGSC0003DMT400047001	Tmv resistance protein n-like; TMV resistance protein N (1238 aa)
PGSC0003DMT400048020	Flavin-containing monooxygenase; Dimethylaniline monooxygenase (524 aa)
PGSC0003DMT400084751	Uncharacterized loc102577828; Zinc finger protein (262 aa)
PGSC0003DMT400041766	Uncharacterized loc102603530; Uncharacterized protein; Conserved gene of unknown function (172 aa)
PGSC0003DMT400072373	Uncharacterized loc102602766; Uncharacterized protein; Transcription factor (399 aa)
PGSC0003DMT400015550	Uncharacterized loc107057828; Uncharacterized protein; Singapore isolate B (sub-type 7) whole genome shotgun sequence assembly, scaffold_0 (714 aa)
PGSC0003DMT400010402	Solute carrier family 25 (mitochondrial adenine nucleotide translocator), member 4/5/6/31; ADP,ATP carrier protein; Belongs to the mitochondrial carrier (TC 2.A.29) family (313 aa)
BBX10	Zinc finger protein constans-like 16-like; B-box zinc finger protein 10; Transcription factor (447 aa)
PGSC0003DMT400013955	Rhodanese-like domain-containing protein 14, chloroplastic; Rhodanese-like domain containing protein (234 aa)
PGSC0003DMT400058566	Uncharacterized protein; Glucose-methanol-choline (Gmc) oxidoreductase (576 aa)
PGSC0003DMT400065724	Random slug protein 5-like; Polyphosphoinositide binding protein Ssh2p (309 aa)
PGSC0003DMT400010863	Uncharacterized protein; Staygreen protein (248 aa)
PGSC0003DMT400069841	Transcription factor myb, plant; Uncharacterized protein; R2R3 transcription factor MYB108 1 (324 aa)
PGSC0003DMT400017879	Uncharacterized protein; Abscission polygalacturonase (393 aa)
PGSC0003DMT400072269	Uncharacterized loc102597783; Alpha/beta fold family protein hydrolase (428 aa)
PGSC0003DMT400005437	Multidrug resistance protein, mate family; Ripening regulated protein DDTFR18; Belongs to the multi antimicrobial extrusion (MATE) (TC 2.A.66.1) family (499 aa)
PGSC0003DMT400058061	Peroxidase 72-like; Peroxidase 72; Belongs to the peroxidase family. Classical plant (class III) peroxidase subfamily (333 aa)
PGSC0003DMT400059103	Uncharacterized loc102587704; Uncharacterized protein; Conserved gene of unknown function (943 aa)
PGSC0003DMT400002788	Putative late blight resistance protein homolog r1b-16; NBS-LRR protein; Belongs to the disease resistance NB-LRR family (851 aa)
PGSC0003DMT400095779	Protein phloem protein 2-like a1-like; Uncharacterized protein; Galactose-binding like (170 aa)
PGSC0003DMT400021855	Wall-associated receptor kinase 2-like; ATP binding protein (781 aa)
PGSC0003DMT400015067	UPF0497 membrane protein 1; Belongs to the Casparian strip membrane proteins (CASP) family (211 aa)
PGSC0003DMT400022657	Secoisolariciresinol dehydrogenase-like; Uncharacterized protein; Short chain alcohol dehydrogenase (263 aa)
PGSC0003DMT400006837	Purple acid phosphatase 22-like; Purple acid phosphatase 22 (443 aa)
PGSC0003DMT400002923	Cytochrome p450 71a1-like; Belongs to the cytochrome P450 family (504 aa)
PGSC0003DMT400030473	Uncharacterized loc102600268; Transposon protein, CACTA, En/Spm sub-class (654 aa)
PGSC0003DMT400002569	Steroid 5-alpha-reductase det2-like; Uncharacterized protein; Conserved gene of unknown function (240 aa)
PGSC0003DMT400063855	Solute carrier family 50 (sugar transporter); Bidirectional sugar transporter SWEET; Mediates both low-affinity uptake and efflux of sugar across the membrane (253 aa)
PGSC0003DMT400032790	Light-harvesting complex ii chlorophyll a/b binding protein 6; Chlorophyll a-b binding protein, chloroplastic; The light-harvesting complex (LHC) functions as a light receptor, it captures and delivers excitation energy to photosystems with which it is closely associated (256 aa)
PGSC0003DMT400051415	Putative late blight resistance protein homolog r1a-10; Uncharacterized protein; RGC1; Belongs to the disease resistance NB-LRR family (484 aa)
PGSC0003DMT400045302	Chlorophyllide a oxygenase, chloroplastic; Uncharacterized protein; Chlorophyll synthase (535 aa)
PGSC0003DMT400019061	Probable wrky transcription factor 40; Uncharacterized protein; MRNA, 1346 bp sequence (253 aa)
PGSC0003DMT400060523	Zinc finger protein zat11-like; Uncharacterized protein; ZPT2-14 (138 aa)
PGSC0003DMT400002013	Lob domain-containing protein 36-like; Protein ASYMMETRIC LEAVES2 (287 aa)
PGSC0003DMT400025631	Serine/threonine-protein kinase bri1-like 2; Uncharacterized protein; Ethylene-inducing xylanase (536 aa)
PGSC0003DMT400004121	Probable magnesium transporter nipa6; Probable magnesium transporter; Acts as a Mg(2+) transporter. Can also transport other divalent cations such as Fe(2+), Sr(2+), Ba(2+), Mn(2+) and Co(2+) but to a much less extent than Mg(2+) (331 aa)
PGSC0003DMT400082121	Uncharacterized n-acetyltransferase p20-like; Uncharacterized protein; N-acetyltransferase (205 aa)
PGSC0003DMT400088293	Uncharacterized protein; Raffionse synthase 2 (114 aa)
PGSC0003DMT400040247	N-hydroxythioamide s-beta-glucosyltransferase; Uncharacterized protein; UDP-glucose:glucosyltransferase (458 aa)
PGSC0003DMT400079205	Uncharacterized protein; Phi-1 (309 aa)
PGSC0003DMT400025787	Thioredoxin-like protein cdsp32, chloroplastic; CDSP32 protein (Chloroplast Drought-induced Stress Protein of 32kDa) (296 aa)
PGSC0003DMT400070613	Probable alpha,alpha-trehalose-phosphate synthase [udp-forming] 11; Uncharacterized protein; Trehalose-6-phosphate synthase (874 aa)
PGSC0003DMT400050909	Germacrene c synthase-like; Uncharacterized protein; Sesquiterpene synthase 2 (550 aa)
PGSC0003DMT400026837	Protein phloem protein 2-like a9-like; Phloem protein 2 (164 aa)
PGSC0003DMT400015075	Photosystem i subunit psao; 16kDa membrane protein (145 aa)
PGSC0003DMT400041184	Uncharacterized protein; Aminoadipic semialdehyde synthase (444 aa)
PGSC0003DMT400030741	Germacrene c synthase-like; Uncharacterized protein; Cembratrienol synthase 2a (545 aa)
PGSC0003DMT400071043	Uncharacterized protein; Gibberellin 2-oxidase; Belongs to the iron/ascorbate-dependent oxidoreductase family (330 aa)
PGSC0003DMT400004597	Uncharacterized protein; Ent-kaurenoic acid oxidase; Belongs to the cytochrome P450 family (497 aa)
PGSC0003DMT400067142	Uncharacterized loc102581551; Heat shock protein 70 (HSP70)-interacting protein (685 aa)
PGSC0003DMT400036202	Uncharacterized protein; Adenylate kinase; Belongs to the adenylate kinase family (297 aa)
Aquaporin-4-like	Uncharacterized protein; Aquaporin, MIP family, PIP subfamily; Belongs to the MIP/aquaporin (TC 1.A.8) family (328 aa)
PGSC0003DMT400067771	Uncharacterized protein; Glucan endo-1,3-beta-glucosidase; Belongs to the glycosyl hydrolase 17 family (383 aa)
PGSC0003DMT400037081	Early endosome antigen 1; ATP binding protein (976 aa)
PGSC0003DMT400092541	Uncharacterized protein; Transposon protein, CACTA, En/Spm sub-class (433 aa)
PGSC0003DMT400009679	Uncharacterized loc102593744; Uncharacterized protein; Conserved gene of unknown function (210 aa)
PGSC0003DMT400080302	Uncharacterized protein; Phytochrome kinase substrate 1 (465 aa)
PGSC0003DMT400002232	Hypersensitive-induced response protein 1-like; Hypersensitive-induced response protein (272 aa)
PGSC0003DMT400030584	Uncharacterized loc102586802; Uncharacterized protein; Conserved gene of unknown function (612 aa)
PGSC0003DMT400012292	Uncharacterized loc102588817; Uncharacterized protein; Electron transporter (601 aa)
PGSC0003DMT400055148	Transcription factor myb, plant; Uncharacterized protein; Transcription factor (330 aa)
PGSC0003DMT400007485	Receptor-like protein 12; Serine/threonine-protein kinase bri1 (776 aa)
PGSC0003DMT400079219	Thylakoid lumenal 29 kDa protein, chloroplastic; Belongs to the peroxidase family (345 aa)
PGSC0003DMT400046621	Uncharacterized loc102596181; Calmodulin-binding protein (332 aa)
PGSC0003DMT400071966	Putative disease resistance protein rga4; Cc-nbs-lrr resistance protein; Belongs to the disease resistance NB-LRR family (1241 aa)
PGSC0003DMT400072173	Uncharacterized loc107060617; TNP2-like transposon protein (445 aa)
PGSC0003DMT400001350	Alpha-dioxygenase 1-like; Uncharacterized protein; Alpha-DOX1 (639 aa)
PGSC0003DMT400036354	5'-AMP-activated protein kinase, catalytic alpha subunit; Belongs to the protein kinase superfamily (470 aa)
PGSC0003DMT400026291	Uncharacterized protein; Miraculin (232 aa)
PGSC0003DMT400070154	Translation factor GUF1 homolog, chloroplastic; Promotes chloroplast protein synthesis. May act as a fidelity factor of the translation reaction, by catalyzing a one- codon backward translocation of tRNAs on improperly translocated ribosomes (682 aa)
PGSC0003DMT400045475	Uncharacterized protein; PAS/LOV protein A (398 aa)
PGSC0003DMT400004623	Receptor-like protein 12; Uncharacterized protein; Conserved gene of unknown function (595 aa)
PGSC0003DMT400028537	Premnaspirodiene oxygenase-like; Uncharacterized protein; Cytochrome P450 hydroxylase (891 aa)
PGSC0003DMT400029984	Uncharacterized loc102587531; Uncharacterized protein; Conserved gene of unknown function (518 aa)
PGSC0003DMT400059626	Copper methylamine oxidase-like; Methylputrescine oxidase (786 aa)
PGSC0003DMT400011147	Putative receptor-like protein kinase at1g72540; Uncharacterized protein; Auxin-regulated dual specificity cytosolic kinase (424 aa)
PGSC0003DMT400018642	Bidirectional sugar transporter sweet2a-like; Bidirectional sugar transporter SWEET; Mediates both low-affinity uptake and efflux of sugar across the membrane (232 aa)
PGSC0003DMT400047599	Uncharacterized protein; F-box family protein (433 aa)
PGSC0003DMT400001663	Cucumber peeling cupredoxin-like; Uncharacterized protein; Stellacyanin CASLP1 (201 aa)
PGSC0003DMT400080844	DNA repair protein XRCC2 homolog (139 aa)
PGSC0003DMT400008728	Transcription factor tcp15-like; Uncharacterized protein; TCP transcription factor (371 aa)
PGSC0003DMT400086995	Ethylene-responsive transcription factor 5-like; Uncharacterized protein; Ethylene response factor 5 (245 aa)
PGSC0003DMT400067730	Probable calcium-binding protein cml48; Ef-hand calcium binding protein (290 aa)
PGSC0003DMT400021508	Uncharacterized loc102599638; Light harvesting protein 3 (253 aa)
PGSC0003DMT400052738	Uncharacterized protein; ATP synthase subunit b', chloroplastic; Belongs to the ATPase B chain family (223 aa)
PGSC0003DMT400001086	Probable glucuronoxylan glucuronosyltransferase irx7; Belongs to the glycosyltransferase 47 family (433 aa)
PGSC0003DMT400078675	Transcription factor bhlh93; DNA binding protein (335 aa)
SN2	Snakin-2-like; Snakin-2; Has an antimicrobial activity. Causes a rapid aggregation of both Gram-positive and Gram-negative bacteria, but the antimicrobial activity is not correlated with the capacity to aggregate bacteria (104 aa)
PGSC0003DMT400058287	Uncharacterized loc102586983; Uncharacterized protein; Conserved gene of unknown function (108 aa)
PGSC0003DMT400037483	Methylecgonone reductase-like; Uncharacterized protein; NADPH-dependent codeinone reductase (124 aa)
PGSC0003DMT400001925	Uncharacterized loc102589528; Uncharacterized protein; Response to dessication RD2 (179 aa)
PGSC0003DMT400052364	L-type lectin-domain containing receptor kinase iv.1-like; Uncharacterized protein; Kinase (693 aa)
PGSC0003DMT400086425	Pentatricopeptide repeat-containing protein at1g31920; Pentatricopeptide repeat-containing protein (605 aa)
PGSC0003DMT400061553	Arogenate dehydrogenase 1, chloroplastic-like; Uncharacterized protein; Prephenate dehydrogenase (274 aa)
PGSC0003DMT400049641	Uncharacterized loc102584127; Uncharacterized protein; Conserved gene of unknown function (275 aa)
PGSC0003DMT400027373	Uncharacterized protein; CYP72A54; Belongs to the cytochrome P450 family (517 aa)
PGSC0003DMT400080885	Uncharacterized protein; Loganic acid methyltransferase (341 aa)
PGSC0003DMT400020187	2-alkenal reductase (NADP(+)-dependent)-like; Uncharacterized protein; Allyl alcohol dehydrogenase (341 aa)
PGSC0003DMT400001405	Tetratricopeptide repeat protein 28-like; Uncharacterized protein; Kinesin light chain (716 aa)
PGSC0003DMT400009035	RING-type E3 ubiquitin transferase; U-box domain-containing protein 5 (736 aa)
GWD3	Phosphoglucan, water dikinase; Uncharacterized protein; Glucan/water dikinase (1202 aa)
PGSC0003DMT400032525	PGR5-like protein 1B, chloroplastic; Uncharacterized protein; PGR5 1A, chloroplastic (319 aa)
PGSC0003DMT400032944	Vacuolar protein sorting-associated protein ist1; Uncharacterized protein; Conserved gene of unknown function (208 aa)
PGSC0003DMT400010101	Uncharacterized loc102580155; Uncharacterized protein; Conserved gene of unknown function (219 aa)
PGSC0003DMT400007905	Osmotin-like protein osml15; Uncharacterized protein; Osmotin (250 aa)
PGSC0003DMT400046718	Cytochrome p450 71a4-like; Belongs to the cytochrome P450 family (502 aa)
PGSC0003DMT400077530	Uncharacterized protein; Serine-threonine protein kinase, plant-type (341 aa)
PGSC0003DMT400092927	Light-harvesting complex ii chlorophyll a/b binding protein 1; Chlorophyll a-b binding protein, chloroplastic; The light-harvesting complex (LHC) functions as a light receptor, it captures and delivers excitation energy to photosystems with which it is closely associated (265 aa)
PGSC0003DMT400027946	Monothiol glutaredoxin-s1-like; Uncharacterized protein; Glutaredoxin (102 aa)
PGSC0003DMT400035330	Auxin-responsive protein saur72-like; Indole-3-acetic acid-induced protein ARG7 (172 aa)
PGSC0003DMT400072744	Protein big grain 1-like e; Uncharacterized protein; Conserved gene of unknown function (310 aa)
PGSC0003DMT400078269	Probable serine/threonine-protein kinase wnk4; NN mitogen-activated protein kinase (635 aa)
PGSC0003DMT400068302	Protein trichome birefringence-like 19; Uncharacterized protein; Conserved gene of unknown function (436 aa)
PGSC0003DMT400038937	Alkane hydroxylase mah1-like; Belongs to the cytochrome P450 family (513 aa)
PGSC0003DMT400096219	Uncharacterized protein; Transcription cofactor (132 aa)
PGSC0003DMT400050262	Nac domain-containing protein 100; NAC domain-containing protein 21/22 (332 aa)
PGSC0003DMT400002053	Uncharacterized protein; Extensin (439 aa)
PGSC0003DMT400020191	Uncharacterized loc107061093; Uncharacterized protein; Conserved gene of unknown function (225 aa)
PGSC0003DMT400072599	UPF0497 membrane protein; Belongs to the Casparian strip membrane proteins (CASP) family (212 aa)
PGSC0003DMT400012072	Uncharacterized loc102585177; Uncharacterized protein; Conserved gene of unknown function (246 aa)
PGSC0003DMT400048376	Uncharacterized loc102606038; One-helix protein (156 aa)
PGSC0003DMT400036879	Uncharacterized protein; Ribulose bisphosphate carboxylase/oxygenase activase, chloroplast (294 aa)
PGSC0003DMT400001104	Zinc finger protein zat5; DNA-binding protein (291 aa)
PGSC0003DMT400058225	Uncharacterized loc102603767; Uncharacterized protein; Conserved gene of unknown function (596 aa)
PGSC0003DMT400003347	Uncharacterized protein; R2R3 Myb30 transcription factor (318 aa)
PGSC0003DMT400045987	Tetraketide alpha-pyrone reductase 1-like; Uncharacterized protein; Cinnamoyl-CoA reductase (526 aa)
PGSC0003DMT400079735	Protein shoot gravitropism 5-like; Nucleic acid binding protein (437 aa)
PGSC0003DMT400017284	Uncharacterized loc102586830; Uncharacterized protein; DNAJ heat shock N-terminal domain-containing protein (457 aa)
PGSC0003DMT400024602	Aspartic protease inhibitor 11-like; Uncharacterized protein; Kunitz-type protease inhibitor (222 aa)
PGSC0003DMT400068851	Protein twin lov 1-like; PAS/LOV protein A (386 aa)
PGSC0003DMT400028706	Ethylene-responsive transcription factor rap2-7-like; PHAP2B protein (445 aa)
PGSC0003DMT400067461	Classical arabinogalactan protein 9; Uncharacterized protein; Methionine rich arabinogalactan (143 aa)
PGSC0003DMT400036852	Chaperone protein dnaj 8, chloroplastic; DnaJ protein (162 aa)
MT400075426	Gibberellin-regulated protein 1-like; Uncharacterized protein; GAST (113 aa)
PGSC0003DMT400030050	Glyceraldehyde-3-phosphate dehydrogenase (NADP+) (phosphorylating); Glyceraldehyde-3-phosphate dehydrogenase A, chloroplastic; Belongs to the glyceraldehyde-3-phosphate dehydrogenase family (399 aa)
PGSC0003DMT400004447	Peroxidase 21; Peroxidase; Removal of H(2)O(2), oxidation of toxic reductants, biosynthesis and degradation of lignin, suberization, auxin catabolism, response to environmental stresses such as wounding, pathogen attack and oxidative stress (324 aa)
PGSC0003DMT400026564	F-box protein pp2-a13-like; F-box family protein (295 aa)
PGSC0003DMT400033379	Stem-specific protein tsjt1-like; Stem-specific protein TSJT1 (253 aa)
PGSC0003DMT400068322	Uncharacterized protein; Zinc finger protein (262 aa)
PGSC0003DMT400065943	Wall-associated receptor kinase 2-like; ATP binding protein (806 aa)
PGSC0003DMT400041222	Uncharacterized protein; Conserved gene of unknown function (412 aa)
PGSC0003DMT400019209	Pumilio rna-binding family; Uncharacterized protein; Pumilio (918 aa)
PGSC0003DMT400054818	Homeobox-leucine zipper protein athb-52-like; Homeobox-leucine zipper protein ATHB-52 (212 aa)
PGSC0003DMT400068444	Uncharacterized protein; Wound-induced protein (150 aa)
PGSC0003DMT400005404	Proteinase inhibitor psi-1.2-like; Proteinase inhibitor type-2 CEVI57 (84 aa)
PGSC0003DMT400037324	Photosynthetic ndh subunit of lumenal location 3, chloroplastic; Oxygen-evolving enhancer protein 3-1, chloroplast (219 aa)
PGSC0003DMT400044229	Uncharacterized protein; Germin subfamily 1 member 19 (226 aa)
PGSC0003DMT400073854	Gdsl esterase/lipase at5g33370-like; Zinc finger protein; Belongs to the 'GDSL' lipolytic enzyme family (366 aa)
PGSC0003DMT400067586	Uncharacterized protein; Leucoanthocyanidin dioxygenase; Belongs to the iron/ascorbate-dependent oxidoreductase family (353 aa)
PGSC0003DMT400014953	Ethylene-responsive transcription factor erf061-like; Uncharacterized protein; AP2/ERF domain-containing transcription factor (312 aa)
PGSC0003DMT400028546	Premnaspirodiene oxygenase-like; Belongs to the cytochrome P450 family (509 aa)
PGSC0003DMT400044650	Uncharacterized protein; CYP72A56; Belongs to the cytochrome P450 family (514 aa)
PGSC0003DMT400068576	Photosynthetic ndh subunit of lumenal location 1, chloroplastic; Uncharacterized protein; Isoform 2 of PsbP 2, chloroplastic (226 aa)
PGSC0003DMT400014861	Photosystem i reaction center subunit n, chloroplastic; Uncharacterized protein; Photosystem I reaction center subunit (169 aa)
PGSC0003DMT400063117	Transcription factor une10; DNA binding protein (437 aa)
PGSC0003DMT400000553	1-aminocyclopropane-1-carboxylate synthase 1/2/6; Uncharacterized protein; 1-aminocyclopropane-1-carboxylate synthase 2 (486 aa)
PGSC0003DMT400000780	Inositol oxygenase 4-like; Uncharacterized protein; Myo-inositol oxygenase (317 aa)
PGSC0003DMT400073096	F-box/kelch-repeat protein at3g23880-like; Ubiquitin-protein ligase (378 aa)
PGSC0003DMT400016307	Protein like cov 3-like; Uncharacterized protein; Conserved gene of unknown function (269 aa)
PGSC0003DMT400012931	Mfs transporter, sp family, sugar:h+ symporter; Uncharacterized protein; Monosaccharid transporter; Belongs to the major facilitator superfamily. Sugar transporter (TC 2.A.1.1) family (524 aa)
PGSC0003DMT400028833	Transcription factor tga6-like; Uncharacterized protein; Transcription factor HBP-1b (248 aa)
PGSC0003DMT400026493	Uncharacterized protein; Phytophthora-inhibited protease 1; Belongs to the peptidase C1 family (344 aa)
PGSC0003DMT400025881	Glyceraldehyde-3-phosphate dehydrogenase (NADP+) (phosphorylating); Glyceraldehyde-3-phosphate dehydrogenase B subunit; Belongs to the glyceraldehyde-3-phosphate dehydrogenase family (450 aa)
PGSC0003DMT400068521	Uncharacterized protein; Major latex (146 aa)
PGSC0003DMT400014983	Transcription factor myb90-like; Uncharacterized protein; MYB transcription factor MYB92 (323 aa)
PGSC0003DMT400000761	Putative gata transcription factor 22; Uncharacterized protein; GATA transcription factor 21 (287 aa)
PGSC0003DMT400022974	Tropinone reductase homolog; Uncharacterized protein; Tropinone reductase 1 (270 aa)
PGSC0003DMT400043166	Lipoxygenase homology domain-containing protein 1-like; TMV-induced protein I (183 aa)
PGSC0003DMT400031607	Transcription repressor myb6-like; Uncharacterized protein; MYB transcription factor MYB185 (273 aa)
PGSC0003DMT400092207	Uncharacterized protein; 'chromo' domain containing protein (147 aa)
RBCS-C	Ribulose bisphosphate carboxylase small chain C, chloroplastic; RuBisCO catalyzes two reactions: the carboxylation of D- ribulose 1,5-bisphosphate, the primary event in carbon dioxide fixation, as well as the oxidative fragmentation of the pentose substrate. Both reactions occur simultaneously and in competition at the same active site (By similarity) (181 aa)
PGSC0003DMT400082398	Pentatricopeptide repeat-containing protein at2g42920, chloroplastic-like; Pentatricopeptide repeat-containing protein (522 aa)
PGSC0003DMT400028828	Uncharacterized protein; Oxidoreductase; Belongs to the iron/ascorbate-dependent oxidoreductase family (360 aa)
PGSC0003DMT400026532	Heavy metal-associated isoprenylated plant protein 26; Copper ion binding protein (108 aa)
PGSC0003DMT400073694	Uncharacterized loc102579625; Uncharacterized protein; Chloroplast post-illumination chlorophyll fluorescence increase protein (277 aa)
PGSC0003DMT400004790	Trimethyltridecatetraene/dimethylnonatriene synthase; Belongs to the cytochrome P450 family (518 aa)
PGSC0003DMT400034478	Auxin-responsive protein saur68-like; Uncharacterized protein; Auxin-induced SAUR (148 aa)
PGSC0003DMT400014464	Wuschel-related homeobox 1; MAEWEST protein (391 aa)
PGSC0003DMT400052829	Photosystem i reaction center subunit psak, chloroplastic; Uncharacterized protein; Photosystem I reaction center subunit X psaK (130 aa)
PGSC0003DMT400078228	60S acidic ribosomal protein P0; Ribosomal protein P0 is the functional equivalent of E.coli protein L10 (318 aa)
PGSC0003DMT400041444	Uncharacterized loc102579346; Uncharacterized protein; Conserved gene of unknown function (123 aa)
PGSC0003DMT400049601	Mfs transporter, oct family, solute carrier family 22 (organic cation transporter), member 4/5; Uncharacterized protein; Organic cation transporter (496 aa)
PGSC0003DMT400009432	Thiosulfate sulfurtransferase 16, chloroplastic; Senescence-associated protein (186 aa)
PGSC0003DMT400037294	Uncharacterized loc102591140; Uncharacterized protein; Conserved gene of unknown function (886 aa)
PGSC0003DMT400011063	Protein nrt1/ ptr family 4.5-like; Uncharacterized protein; Nitrate transporter (583 aa)
PGSC0003DMT400061716	Uncharacterized protein; Peroxidase 29; Belongs to the peroxidase family (235 aa)
SnRK2.5	Serine/threonine-protein kinase sapk2-like; Serine/threonine-protein kinase SAPK2; Belongs to the protein kinase superfamily (344 aa)
PGSC0003DMT400031777	Phosphoglycerate mutase-like protein at74; Uncharacterized protein; Phosphoglycerate mutase (340 aa)
PGSC0003DMT400018498	5-O-(4-coumaroyl)-D-quinate 3'-monooxygenase; Uncharacterized protein; P-coumaroyl quinate/shikimate 3'-hydroxylase (310 aa)
PGSC0003DMT400043704	E3 ubiquitin-protein ligase TRAF7; F-box and wd40 domain protein (436 aa)
PGSC0003DMT400072972	Sarcoplasmic reticulum histidine-rich calcium-binding protein-like; Uncharacterized protein; Conserved gene of unknown function (551 aa)
PGSC0003DMT400015060	Putative uncharacterized protein ddb_g0277255; Uncharacterized protein; Conserved gene of unknown function (285 aa)
PGSC0003DMT400061924	UPF0496 protein At3g49070-like; Uncharacterized protein; Conserved gene of unknown function (160 aa)
PGSC0003DMT400030052	Protein high chlorophyll fluorescent 107; Uncharacterized protein; Pre-mRNA splicing factor (681 aa)
PGSC0003DMT400046720	Cytochrome p450 71a4-like; Uncharacterized protein; Cytochrome P450 71A4 (460 aa)
PGSC0003DMT400018331	12-hydroxyjasmonoyl-L-amino acid 12-hydroxylase / fatty acid hydroxylase; Uncharacterized protein; Cytochrome P450 (489 aa)
PGSC0003DMT400003235	Putative germin-like protein 9-2; Uncharacterized protein; Nectarin-1 (208 aa)
PGSC0003DMT400002567	Very-long-chain enoyl-coa reductase-like; Uncharacterized protein; 3-oxo-5-alpha-steroid 4-dehydrogenase family protein (273 aa)
InvCD111	Beta-fructofuranosidase, insoluble isoenzyme 1-like; Uncharacterized protein; Beta-fructofuranosidase; Belongs to the glycosyl hydrolase 32 family (536 aa)
PGSC0003DMT400044441	Uncharacterized protein; 1-aminocyclopropane-1-carboxylate oxidase homolog; Belongs to the iron/ascorbate-dependent oxidoreductase family (354 aa)
PGSC0003DMT400035788	Two-component response regulator orr26-like; Uncharacterized protein; Two-component system sensor histidine kinase/response regulator (217 aa)
PGSC0003DMT400019583	Photosystem i reaction center subunit vi-2, chloroplastic-like; Uncharacterized protein; PSI-H (143 aa)
PGSC0003DMT400080553	Pentatricopeptide repeat-containing protein, chloroplastic (628 aa)
PGSC0003DMT400037790	UPF0483 protein GA18864-like; Uncharacterized protein; Conserved gene of unknown function (250 aa)
PGSC0003DMT400051196	Dihydroflavonol-4-reductase-like; Uncharacterized protein; Nadhp hc toxin reductase (305 aa)
PGSC0003DMT400078178	Cytochrome p450 family 71 subfamily a; Belongs to the cytochrome P450 family (503 aa)
PGSC0003DMT400064763	Protein chlororespiratory reduction 7, chloroplastic; Uncharacterized protein; Conserved gene of unknown function (154 aa)
PGSC0003DMT400049394	Fructose-1,6-bisphosphatase, chloroplastic-like; Uncharacterized protein; Chloroplast fructose-1,6-bisphosphatase I; Belongs to the FBPase class 1 family (409 aa)
PGSC0003DMT400025446	Cytochrome p450 cyp736a12-like; Belongs to the cytochrome P450 family (504 aa)
PGSC0003DMT400029182	WAT1-related protein; Auxin-induced protein 5NG4 (341 aa)
PGSC0003DMT400004893	Isoleucine n-monooxygenase 1-like; Belongs to the cytochrome P450 family (346 aa)
PGSC0003DMT400043054	Light-harvesting complex ii chlorophyll a/b binding protein 1; Chlorophyll a-b binding protein, chloroplastic; The light-harvesting complex (LHC) functions as a light receptor, it captures and delivers excitation energy to photosystems with which it is closely associated (267 aa)
PGSC0003DMT400022924	Alcohol-forming fatty acyl-coa reductase; Fatty acyl-CoA reductase; Catalyzes the reduction of fatty acyl-CoA to fatty alcohols (465 aa)
Phosphomannomutase-like	Phosphomannomutase-like; Phosphomannomutase; Involved in the synthesis of the GDP-mannose and dolichol-phosphate-mannose required for a number of critical mannosyl transfer reactions (254 aa)
PGSC0003DMT400026051	Proline dehydrogenase 2, mitochondrial-like; Proline dehydrogenase; Converts proline to delta-1-pyrroline-5-carboxylate (500 aa)
PGSC0003DMT400036934	Uncharacterized protein; Ethylene-responsive transcription factor ERF114 (276 aa)
RBCS-1	Ribulose bisphosphate carboxylase small chain 1, chloroplastic; RuBisCO catalyzes two reactions: the carboxylation of D- ribulose 1,5-bisphosphate, the primary event in carbon dioxide fixation, as well as the oxidative fragmentation of the pentose substrate. Both reactions occur simultaneously and in competition at the same active site (By similarity) (181 aa)
PGSC0003DMT400069306	Protein shoot gravitropism 5-like; Uncharacterized protein; C3HL domain class transcription factor (411 aa)
PGSC0003DMT400068341	Cationic peroxidase 1-like; Class III peroxidase; Belongs to the peroxidase family. Classical plant (class III) peroxidase subfamily (316 aa)
PGSC0003DMT400065256	Uncharacterized protein; Conserved gene of unknown function (285 aa)
PGSC0003DMT400032353	Uncharacterized protein; Abscisic acid ABA receptor (408 aa)
PGSC0003DMT400000865	Uncharacterized loc102596015; Ultraviolet-B-repressible protein (119 aa)
PGSC0003DMT400011902	Xyloglucan endotransglucosylase/hydrolase; Catalyzes xyloglucan endohydrolysis (XEH) and/or endotransglycosylation (XET). Cleaves and religates xyloglucan polymers, an essential constituent of the primary cell wall, and thereby participates in cell wall construction of growing tissues; Belongs to the glycosyl hydrolase 16 family (279 aa)
PGSC0003DMT400033351	1,4-dihydroxy-2-naphthoyl-CoA thioesterase 1-like; Uncharacterized protein; Acyl-CoA thioesterase (159 aa)
PGSC0003DMT400007670	Uncharacterized loc102587762; Uncharacterized protein; P20Sh148J07 (316 aa)
PGSC0003DMT400070826	Protein EPIDERMAL PATTERNING FACTOR 2 (117 aa)
PGSC0003DMT400080457	Uncharacterized loc102585078; Uncharacterized protein; Conserved gene of unknown function (443 aa)
LOX1.5	Probable linoleate 9S-lipoxygenase 5; Plant lipoxygenases may be involved in a number of diverse aspects of plant physiology including growth and development, pest resistance, and senescence or responses to wounding. May contribute to cell death during the hypersensitive response (HR) by the massive production of free fatty acid hydroperoxides. Catalyzes the hydroperoxidation of lipids containing…
PGSC0003DMT400034896	Light-harvesting complex ii chlorophyll a/b binding protein 1; Chlorophyll a-b binding protein, chloroplastic; The light-harvesting complex (LHC) functions as a light receptor, it captures and delivers excitation energy to photosystems with which it is closely associated (267 aa)
PGSC0003DMT400059880	Beta-galactosidase 15-like; Beta-galactosidase (770 aa)
PGSC0003DMT400027602	Protochlorophyllide-dependent translocon component 52, chloroplastic; Uncharacterized protein; Pheophorbide A oxygenase (543 aa)
PGSC0003DMT400066337	Abscisic acid 8'-hydroxylase 4-like; Belongs to the cytochrome P450 family (478 aa)
PGSC0003DMT400034913	Gdsl esterase/lipase at5g45670-like; GDSL-lipase protein; Belongs to the 'GDSL' lipolytic enzyme family (352 aa)
PGSC0003DMT400052839	Beta-amylase 3, chloroplastic-like; Beta-amylase PCT-BMYI (541 aa)
PGSC0003DMT400068129	Light-harvesting complex ii chlorophyll a/b binding protein 5; Chlorophyll a-b binding protein, chloroplastic; The light-harvesting complex (LHC) functions as a light receptor, it captures and delivers excitation energy to photosystems with which it is closely associated (285 aa)
PGSC0003DMT400065148	Nad(p)h-quinone oxidoreductase subunit m, chloroplastic; Uncharacterized protein; NADH dehydrogenase (210 aa)
PGSC0003DMT400071877	Probable leucine-rich repeat receptor-like protein kinase at1g35710; LRR receptor-like serine/threonine-protein kinase (973 aa)
PGSC0003DMT400010985	Light-harvesting complex ii chlorophyll a/b binding protein 2; Chlorophyll a-b binding protein, chloroplastic; The light-harvesting complex (LHC) functions as a light receptor, it captures and delivers excitation energy to photosystems with which it is closely associated (265 aa)
PGSC0003DMT400022740	Transcriptional regulator tac1-like; Uncharacterized protein; Transcriptional regulator SUPERMAN (177 aa)
PGSC0003DMT400062001	Feruloyl coa ortho-hydroxylase 2-like; Uncharacterized protein; Leucoanthocyanidin dioxygenase; Belongs to the iron/ascorbate-dependent oxidoreductase family (363 aa)
PGSC0003DMT400009982	Peroxisomal fatty acid beta-oxidation multifunctional protein aim1-like; Multifunctional protein (712 aa)
PGSC0003DMT400076572	Multiprotein-bridging factor 1c; Uncharacterized protein; Ethylene-responsive transcriptional coactivator (146 aa)
PGSC0003DMT400007108	WAT1-related protein; Auxin-induced protein 5NG4 (336 aa)
PGSC0003DMT400051575	UPF0481 protein At3g47200-like; Uncharacterized protein; Conserved gene of unknown function (480 aa)
PGSC0003DMT400039929	Probable carboxylesterase 2; Uncharacterized protein; Gibberellin receptor GID1 (321 aa)
PGSC0003DMT400042546	Photosystem i reaction center subunit vi-2, chloroplastic; Uncharacterized protein; PSI-H (145 aa)
CKX3	Uncharacterized protein; Cytokinin oxidase/dehydrogenase (533 aa)
PGSC0003DMT400075017	Calcium uniporter protein 2, mitochondrial-like; Uncharacterized protein; Conserved gene of unknown function (322 aa)
PGSC0003DMT400086700	Cytosolic sulfotransferase 12-like; Flavonol 4'-sulfotransferase; Belongs to the sulfotransferase 1 family (329 aa)
PGSC0003DMT400024006	Protein embryo sac development arrest 3, chloroplastic; Uncharacterized protein; Conserved gene of unknown function (110 aa)
PGSC0003DMT400063858	Mitogen-activated protein kinase kinase kinase yoda-like; Uncharacterized protein; MAP3Ka (415 aa)
PGSC0003DMT400059995	Light-harvesting complex i chlorophyll a/b binding protein 1; Chlorophyll a-b binding protein, chloroplastic; The light-harvesting complex (LHC) functions as a light receptor, it captures and delivers excitation energy to photosystems with which it is closely associated (246 aa)
PGSC0003DMT400060313	Light-harvesting complex i chlorophyll a/b binding protein 1; Chlorophyll a-b binding protein, chloroplastic; The light-harvesting complex (LHC) functions as a light receptor, it captures and delivers excitation energy to photosystems with which it is closely associated (246 aa)
PGSC0003DMT400017363	Putative germin-like protein 2-1; Uncharacterized protein; Germin 12 (225 aa)
PGSC0003DMT400077074	Uncharacterized loc102605612; Uncharacterized protein; Conserved gene of unknown function (218 aa)
PGSC0003DMT400022657	Secoisolariciresinol dehydrogenase-like; Uncharacterized protein; Short chain alcohol dehydrogenase (263 aa)
PGSC0003DMT400067920	Light-regulated protein; Uncharacterized protein; UPA22 (135 aa)
PGSC0003DMT400006594	Coatomer subunit beta'-1-like; Uncharacterized protein; Coatomer subunit beta'-2 (190 aa)
PGSC0003DMT400040198	3-ketoacyl-CoA synthase 3-like; Beta-ketoacyl-coa synthase family protein (466 aa)
PGSC0003DMT400068047	Uncharacterized protein; Aquaporin TIP2;3; Belongs to the MIP/aquaporin (TC 1.A.8) family (248 aa)
PGSC0003DMT400012709	Branched-chain-amino-acid aminotransferase 2, chloroplastic-like; Branched-chain-amino-acid aminotransferase; Belongs to the class-IV pyridoxal-phosphate-dependent aminotransferase family (378 aa)
PGSC0003DMT400027459	(-)-germacrene d synthase-like; Uncharacterized protein; Sesquiterpene synthase (499 aa)
PGSC0003DMT400031245	Root phototropism protein 2; Uncharacterized protein; BZIP domain class transcription factor; Belongs to the NPH3 family (576 aa)
PGSC0003DMT400002259	Homeobox-leucine zipper protein athb-13; DNA-binding protein (235 aa)
Phosphoribulokinase	Phosphoribulokinase, chloroplastic; Phosphoribulokinase (405 aa)
PGSC0003DMT400018283	Ubiquitin domain-containing protein 2-like; Ubiquitin domain-containing protein (115 aa)
PGSC0003DMT400028793	Protein nrt1/ ptr family 5.6-like; Uncharacterized protein; Peptide transporter (597 aa)
PGSC0003DMT400012606	G-type lectin s-receptor-like serine/threonine-protein kinase at4g27290; Belongs to the protein kinase superfamily. Ser/Thr protein kinase family (818 aa)
PGSC0003DMT400066469	Uncharacterized loc102594981; Uncharacterized protein; Conserved gene of unknown function (290 aa)
PGSC0003DMT400056316	Xyloglucan endotransglucosylase/hydrolase; Catalyzes xyloglucan endohydrolysis (XEH) and/or endotransglycosylation (XET). Cleaves and religates xyloglucan polymers, an essential constituent of the primary cell wall, and thereby participates in cell wall construction of growing tissues; Belongs to the glycosyl hydrolase 16 family (276 aa)
PGSC0003DMT400028102	Serine decarboxylase-like; Uncharacterized protein; Aromatic amino acid decarboxylase 1B (407 aa)
PGSC0003DMT400074120	1-aminocyclopropane-1-carboxylate oxidase homolog; Uncharacterized protein; 2-oxoglutarate-dependent dioxygenase; Belongs to the iron/ascorbate-dependent oxidoreductase family (364 aa)
PGSC0003DMT400018023	Lecithin-cholesterol acyltransferase-like 1; Uncharacterized protein; 1-O-acylceramide synthase (416 aa)
PGSC0003DMT400048000	L-ascorbate oxidase homolog; Uncharacterized protein; Multicopper oxidase (522 aa)
PGSC0003DMT400008240	S-norcoclaurine synthase 1-like; Uncharacterized protein; Conserved gene of unknown function (149 aa)

## Sheet: Upregulated TF
Upregulated transcription factors from the genome-wide analysis
Identifier	Annotation
PGSC0003DMT400036707	AP2-like ethylene-responsive transcription factor At1g16060
PGSC0003DMT400036707	AP2-like ethylene-responsive transcription factor At1g16060
BBX16	B-box zinc finger protein 20-like
BBX17	B-box zinc finger protein 22-like
BBX24	B-box zinc finger protein 32
PGSC0003DMT400017965	B2 protein-like
PGSC0003DMT400066323	B3 domain-containing protein At3g19184
PGSC0003DMT400020700	B3 domain-containing protein At5g42700-like
PGSC0003DMT400027673	B3 domain-containing protein At5g60140-like
PGSC0003DMT400004523	B3 domain-containing protein Os06g0112300-like
PGSC0003DMT400024676	B3 domain-containing protein REM10-like
PGSC0003DMT400067664	B3 domain-containing protein REM17-like
PGSC0003DMT400007199	B3 domain-containing transcription factor VRN1-like
PGSC0003DMT400032381	basic leucine zipper 34-like
PGSC0003DMT400003516	basic leucine zipper 43-like
BEL13	BEL1-like homeodomain protein 2
PGSC0003DMT400061403	bZIP transcription factor 27-like
PGSC0003DMT400079474	bZIP transcription factor 53-like
PGSC0003DMT400079474	bZIP transcription factor 53-like
PGSC0003DMT400079474	bZIP transcription factor 53-like
PGSC0003DMT400037877	ethylene-responsive transcription factor 1-like
PGSC0003DMT400036837	ethylene-responsive transcription factor 1B-like
PGSC0003DMT400036837	ethylene-responsive transcription factor 1B-like
PGSC0003DMT400036837	ethylene-responsive transcription factor 1B-like
PGSC0003DMT400036837	ethylene-responsive transcription factor 1B-like
PGSC0003DMT400036837	ethylene-responsive transcription factor 1B-like
PGSC0003DMT400005836	ethylene-responsive transcription factor 2-like
PGSC0003DMT400068959	ethylene-responsive transcription factor 4-like
PGSC0003DMT400068959	ethylene-responsive transcription factor 4-like
PGSC0003DMT400033391	ethylene-responsive transcription factor 8-like
PGSC0003DMT400006041	ethylene-responsive transcription factor CRF4-like
PGSC0003DMT400067218	ethylene-responsive transcription factor ERF003-like
PGSC0003DMT400084506	ethylene-responsive transcription factor ERF011-like
PGSC0003DMT400018137	ethylene-responsive transcription factor ERF023
PGSC0003DMT400066977	ethylene-responsive transcription factor ERF034-like
PGSC0003DMT400080372	ethylene-responsive transcription factor ERF062
PGSC0003DMT400034984	ethylene-responsive transcription factor ERF098-like
PGSC0003DMT400043311	ethylene-responsive transcription factor RAP2-3
PGSC0003DMT400042612	ethylene-responsive transcription factor TINY-like
PGSC0003DMT400070735	ethylene-responsive transcription factor WRI1-like
PGSC0003DMT400061058	F-box protein At1g10780
PGSC0003DMT400004427	F-box protein At2g26160-like
PGSC0003DMT400021568	F-box protein At2g26850
PGSC0003DMT400036641	F-box protein At5g07610-like
PGSC0003DMT400038429	F-box protein At5g51370-like
PGSC0003DMT400046369	F-box protein CPR30-like
PGSC0003DMT400072413	F-box protein PP2-A15-like
PGSC0003DMT400072413	F-box protein PP2-A15-like
PGSC0003DMT400063740	F-box protein PP2-B15-like
PGSC0003DMT400052833	F-box protein SKIP19-like
PGSC0003DMT400048479	F-box protein SNE-like
PGSC0003DMT400024635	F-box/FBD/LRR-repeat protein At4g26340-like
PGSC0003DMT400070545	F-box/kelch-repeat protein At5g26960
PGSC0003DMT400004486	F-box/kelch-repeat protein SKIP25-like
PGSC0003DMT400016131	F-box/LRR-repeat protein 14-like
PGSC0003DMT400049672	F-box/LRR-repeat protein 17
PGSC0003DMT400000761	GATA transcription factor 17
PGSC0003DMT400040074	GATA transcription factor 19
PGSC0003DMT400011449	GATA transcription factor 19-like
PGSC0003DMT400089018	GATA transcription factor 5-like
PGSC0003DMT400059989	GATA transcription factor 8-like
PGSC0003DMT400058709	GATA zinc finger domain-containing protein 15-like
PGSC0003DMT400031584	homeobox-leucine zipper protein ATHB-7-like
PGSC0003DMT400067540	homeobox-leucine zipper protein HAT4
PGSC0003DMT400003586	homeobox-leucine zipper protein HAT7-like
PGSC0003DMT400030361	homeobox-leucine zipper protein ROC3-like
PGSC0003DMT400072322	nuclear transcription factor Y subunit A-10-like
PGSC0003DMT400017698	nuclear transcription factor Y subunit A-7-like
PGSC0003DMT400017698	nuclear transcription factor Y subunit A-7-like
PGSC0003DMT400037958	nuclear transcription factor Y subunit B-5-like
PGSC0003DMT400032090	probable WRKY transcription factor 56
PGSC0003DMT400017859	probable WRKY transcription factor 72
PGSC0003DMT400056685	putative transcription factor bHLH041
PGSC0003DMT400018274	transcription factor bHLH120-like
PGSC0003DMT400015017	transcription factor bHLH14-like
PGSC0003DMT400078696	transcription factor bHLH18-like
PGSC0003DMT400078696	transcription factor bHLH18-like
PGSC0003DMT400026449	transcription factor bHLH30-like
PGSC0003DMT400010463	transcription factor bHLH35
PGSC0003DMT400068342	transcription factor bHLH61-like
PGSC0003DMT400011651	transcription factor bHLH62-like
PGSC0003DMT400020244	transcription factor bHLH66
PGSC0003DMT400062844	transcription factor bHLH79-like
PGSC0003DMT400016360	transcription factor bHLH93-like
PGSC0003DMT400016360	transcription factor bHLH93-like
PGSC0003DMT400073574	transcription factor bHLH94-like
PGSC0003DMT400005446	transcription factor bHLH96-like
PGSC0003DMT400026037	transcription factor DICHOTOMA-like
PGSC0003DMT400042347	transcription factor E2FA
PGSC0003DMT400005490	transcription factor LUX
PGSC0003DMT400072687	transcription factor MYB113-like
PGSC0003DMT400023322	transcription factor MYB12
PGSC0003DMT400057690	transcription factor MYB34
PGSC0003DMT400016394	transcription factor MYB39
PGSC0003DMT400012702	transcription factor MYB39-like
PGSC0003DMT400012702	transcription factor MYB39-like
PGSC0003DMT400012702	transcription factor MYB39-like
PGSC0003DMT400008569	transcription factor MYB44-like
TSF	transcription factor MYB82-like
PGSC0003DMT400069644	transcription factor MYB86-like
PGSC0003DMT400047220	transcription factor MYC2-like
PGSC0003DMT400047220	transcription factor MYC2-like
PGSC0003DMT400044708	transcription factor PAR1
PGSC0003DMT400044708	transcription factor PAR1
PGSC0003DMT400008752	transcription factor PRE1-like
PGSC0003DMT400008752	transcription factor PRE1-like
PGSC0003DMT400009926	transcription factor RAX1-like
PGSC0003DMT400005085	transcription factor RAX2-like
PGSC0003DMT400012702	transcription factor RAX2-like
PGSC0003DMT400071914	transcription factor SCREAM2-like
PGSC0003DMT400010253	transcription factor SPATULA
PGSC0003DMT400002153	transcription factor TCP12-like
PGSC0003DMT400029743	transcription factor TGA2-like
PGSC0003DMT400063862	transcription factor WER-like
PGSC0003DMT400050131	zinc finger A20 and AN1 domain-containing stress-associated protein 4-like
PGSC0003DMT400000933	zinc finger CCCH domain-containing protein 20
PGSC0003DMT400013647	zinc finger CCCH domain-containing protein 32
PGSC0003DMT400053242	zinc finger CCCH domain-containing protein 32-like
PGSC0003DMT400027205	zinc finger CCCH domain-containing protein 53
PGSC0003DMT400012540	zinc finger CCCH domain-containing protein 62-like
PGSC0003DMT400036628	zinc finger protein 1
PGSC0003DMT400073330	zinc finger protein 1-like
PGSC0003DMT400037771	zinc finger protein 6-like
PGSC0003DMT400037771	zinc finger protein 6-like
PGSC0003DMT400001105	zinc finger protein STOP1 homolog
PGSC0003DMT400012154	zinc finger protein ZAT1
PGSC0003DMT400063111	zinc finger protein ZAT1-like
PGSC0003DMT400079773	zinc finger protein ZAT5-like
PGSC0003DMT400034293	zinc finger Ran-binding domain-containing protein 2-like
PGSC0003DMT400045724	zinc transporter 5-like
PGSC0003DMT400038659	zinc transporter 8-like
PGSC0003DMT400009581	zinc-finger homeodomain protein 2
PGSC0003DMT400060623	zinc-finger homeodomain protein 2-like
PGSC0003DMT400083993	zinc-finger homeodomain protein 9-like
PGSC0003DMT400023368	WRKY transcription factor 4
PGSC0003DMT400020662	WUSCHEL-related homeobox 4
PGSC0003DMT400003980	WUSCHEL-related homeobox 8
PGSC0003DMT400027850	WUSCHEL-related homeobox 9-like
PGSC0003DMT400047825	Myb-related protein 3r-1-like

## Sheet: Downregulated TF
Downregulated transcription factors from the genome-wide analysis
Identifier	Annotation
PGSC0003DMT400058560	agamous-like MADS-box protein AGL15
PGSC0003DMT400046967	agamous-like MADS-box protein AGL80
PGSC0003DMT400026576	MADS-box protein SOC1-like
PGSC0003DMT400000210	MADS-box transcription factor 47-like
PGSC0003DMT400023711	AP2-like ethylene-responsive transcription factor AIL1
PGSC0003DMT400065501	AP2-like ethylene-responsive transcription factor TOE3
PGSC0003DMT400002125	AP2/ERF and B3 domain-containing transcription factor RAV1
PGSC0003DMT400019296	AP2/ERF and B3 domain-containing transcription factor RAV1
BBX20	B-box zinc finger protein 20
BBX17	B-box zinc finger protein 24-like
PGSC0003DMT400023077	B3 domain-containing protein At2g36080-like
PGSC0003DMT400066312	B3 domain-containing protein At5g42700-like
PGSC0003DMT400035365	B3 domain-containing protein REM10-like
PGSC0003DMT400015011	B3 domain-containing transcription factor NGA3-like
PGSC0003DMT400007200	B3 domain-containing transcription factor VRN1-like
PGSC0003DMT400078282	B3 domain-containing transcription repressor VAL2
PGSC0003DMT400009609	BEL1-like homeodomain protein 11
PGSC0003DMT400039384	BTB/POZ and TAZ domain-containing protein 1
PGSC0003DMT400069392	BTB/POZ and TAZ domain-containing protein 1-like
PGSC0003DMT400029056	BTB/POZ domain-containing protein At2g24240-like
PGSC0003DMT400025851	BTB/POZ domain-containing protein At2g30600
PGSC0003DMT400055916	BTB/POZ domain-containing protein At3g22104-like
PGSC0003DMT400033866	BTB/POZ domain-containing protein At5g67385-like
PGSC0003DMT400066161	BTB/POZ domain-containing protein NPY2
PGSC0003DMT400075105	BURP domain-containing protein 5-like
PGSC0003DMT400051337	BURP domain-containing protein 5-like
PGSC0003DMT400040054	bZIP transcription factor 53-like
PGSC0003DMT400007165	bZIP transcription factor 53-like
BBX1	CONSTANS
BBX12	CONSTANS
PGSC0003DMT400007904	ethylene-responsive proteinase inhibitor 1
PGSC0003DMT400045325	ethylene-responsive proteinase inhibitor 1-like
PGSC0003DMT400037826	ethylene-responsive transcription factor 1B-like
PGSC0003DMT400034873	ethylene-responsive transcription factor 1B-like
PGSC0003DMT400067535	ethylene-responsive transcription factor 2-like
PGSC0003DMT400086995	ethylene-responsive transcription factor 5-like
PGSC0003DMT400090475	ethylene-responsive transcription factor 5-like
ERF3	ethylene-responsive transcription factor 5-like
PGSC0003DMT400027937	ethylene-responsive transcription factor 5-like
PGSC0003DMT400016306	ethylene-responsive transcription factor ABR1-like
DREB2	ethylene-responsive transcription factor ERF010-like
PGSC0003DMT400014953	ethylene-responsive transcription factor ERF061-like
ERF5	ethylene-responsive transcription factor ERF106-like
PGSC0003DMT400048407	ethylene-responsive transcription factor ERF110-like
PGSC0003DMT400036934	ethylene-responsive transcription factor ERF114-like
PGSC0003DMT400056527	ethylene-responsive transcription factor LEP-like
PGSC0003DMT400022023	ethylene-responsive transcription factor RAP2-13
PGSC0003DMT400028706	ethylene-responsive transcription factor RAP2-7
PGSC0003DMT400010228	ethylene-responsive transcription factor RAP2-7-like
PGSC0003DMT400013995	eukaryotic translation initiation factor 2 subunit gamma-like
PGSC0003DMT400024461	F-box protein At2g32560-like
PGSC0003DMT400097155	F-box protein At4g18380-like
PGSC0003DMT400056172	F-box protein At5g07610-like
PGSC0003DMT400018612	F-box protein At5g07610-like
PGSC0003DMT400001635	F-box protein At5g49610-like
PGSC0003DMT400026564	F-box protein PP2-A13-like
PGSC0003DMT400076213	F-box protein PP2-B1-like
PGSC0003DMT400063744	F-box protein PP2-B15-like
PGSC0003DMT400081916	F-box protein SKIP28
PGSC0003DMT400047695	F-box protein SKIP31-like
PGSC0003DMT400015675	F-box protein SNE-like
PGSC0003DMT400060940	F-box/kelch-repeat protein At1g15670-like
PGSC0003DMT400077644	F-box/kelch-repeat protein At3g06240-like
PGSC0003DMT400009709	F-box/kelch-repeat protein At3g23880-like
PGSC0003DMT400073096	F-box/kelch-repeat protein At3g23880-like
PGSC0003DMT400020318	F-box/LRR-repeat MAX2 homolog A-like
PGSC0003DMT400011449	GATA transcription factor 21
PGSC0003DMT400002259	homeobox-leucine zipper protein ATHB-13
PGSC0003DMT400054818	homeobox-leucine zipper protein ATHB-52-like
PGSC0003DMT400026968	homeobox-leucine zipper protein HAT22-like
PGSC0003DMT400014383	myb-related protein 305-like
PGSC0003DMT400003347	myb-related protein 306-like
PGSC0003DMT400032930	myb-related protein 315-like
PGSC0003DMT400074183	probable transcription factor KAN4
PGSC0003DMT400052592	probable transcription repressor OFP9
PGSC0003DMT400032091	probable WRKY transcription factor 29
PGSC0003DMT400053122	probable WRKY transcription factor 3
PGSC0003DMT400023502	probable WRKY transcription factor 30
PGSC0003DMT400019061	probable WRKY transcription factor 40
PGSC0003DMT400073396	probable WRKY transcription factor 40
PGSC0003DMT400079980	probable WRKY transcription factor 51
PGSC0003DMT400070939	probable WRKY transcription factor 70
PGSC0003DMT400075091	WRKY transcription factor 6
PGSC0003DMT400014464	WUSCHEL-related homeobox 1
StWRKY11	WUSCHEL-related homeobox 11-like
PGSC0003DMT400093666	putative F-box/LRR-repeat protein At5g02930
PGSC0003DMT400006688	putative F-box/LRR-repeat protein At5g02930
PGSC0003DMT400000761	putative GATA transcription factor 22
PGSC0003DMT400044605	RING finger protein 44
PGSC0003DMT400017897	RING-H2 finger protein ATL3-like
PGSC0003DMT400045167	RING-H2 finger protein ATL52-like
PGSC0003DMT400097765	RING-H2 finger protein ATL60-like
PGSC0003DMT400024359	RING-H2 finger protein ATL73-like
PGSC0003DMT400015477	RING-H2 finger protein ATL78-like
PGSC0003DMT400015478	RING-H2 finger protein ATL78-like
STBRC1B	TCP transcription factor BRC1b
PGSC0003DMT400022771	transcription factor AS1
PGSC0003DMT400042791	transcription factor BEE 1-like
PGSC0003DMT400013766	transcription factor BEE 1-like
PGSC0003DMT400014656	transcription factor BEE 3
PGSC0003DMT400009603	transcription factor bHLH110
PGSC0003DMT400012997	transcription factor bHLH112-like
PGSC0003DMT400027293	transcription factor bHLH118-like
PGSC0003DMT400049504	transcription factor bHLH125-like
PGSC0003DMT400051137	transcription factor bHLH137-like
PGSC0003DMT400040448	transcription factor bHLH51-like
PGSC0003DMT400071293	transcription factor bHLH51-like
PGSC0003DMT400078675	transcription factor bHLH93
PGSC0003DMT400069753	transcription factor DIVARICATA-like
PGSC0003DMT400076223	transcription factor FAMA
PGSC0003DMT400040761	transcription factor FAMA-like
PGSC0003DMT400040021	transcription factor HBI1
CHL1	transcription factor HBI1-like
PGSC0003DMT400049124	transcription factor JUNGBRUNNEN 1-like
PGSC0003DMT400069841	transcription factor MYB108
PGSC0003DMT400022600	transcription factor MYB108
PGSC0003DMT400011745	transcription factor MYB108-like
PGSC0003DMT400067321	transcription factor MYB113-like
PGSC0003DMT400035748	transcription factor MYB114-like
PGSC0003DMT400029257	transcription factor MYB3
PGSC0003DMT400078477	transcription factor MYB3-like
PGSC0003DMT400047076	transcription factor MYB35-like
PGSC0003DMT400040149	transcription factor MYB48
PGSC0003DMT400014983	transcription factor MYB90-like
PGSC0003DMT400041156	transcription factor PIF4
PGSC0003DMT400015377	transcription factor PIF5-like
PGSC0003DMT400048261	transcription factor RAX1
PGSC0003DMT400055148	transcription factor RAX3
PGSC0003DMT400008728	transcription factor TCP15-like
PGSC0003DMT400003453	transcription factor TCP17
PGSC0003DMT400023981	transcription factor TCP23-like
PGSC0003DMT400024329	transcription factor TCP4
PGSC0003DMT400039786	transcription factor TCP4-like
PGSC0003DMT400028833	transcription factor TGA6-like
PGSC0003DMT400066807	transcription factor UNE10
PGSC0003DMT400063117	transcription factor UNE10
PGSC0003DMT400083164	transcription factor UNE10-like
PGSC0003DMT400018826	transcription factor UPBEAT1
PGSC0003DMT400000932	transcription factor WER-like
PGSC0003DMT400029758	uncharacterized LOC102578723
PGSC0003DMT400001376	zinc finger AN1 domain-containing stress-associated protein 12
PGSC0003DMT400015693	zinc finger CCCH domain-containing protein 18
PGSC0003DMT400058625	zinc finger protein 3-like
PGSC0003DMT400067667	zinc finger protein 622
BBX7	zinc finger protein CONSTANS-LIKE 10
BBX14	zinc finger protein CONSTANS-LIKE 16-like
PGSC0003DMT400020030	zinc finger protein CONSTANS-LIKE 16-like
BBX10	zinc finger protein CONSTANS-LIKE 16-like
BBX2	zinc finger protein CONSTANS-LIKE 2
BBX5	zinc finger protein CONSTANS-LIKE 4-like
BBX4	zinc finger protein CONSTANS-LIKE 4-like
PGSC0003DMT400060839	zinc finger protein GIS-like
#N/A	zinc finger protein JAGGED
PGSC0003DMT400091896	zinc finger protein ZAT10-like
PGSC0003DMT400030168	zinc finger protein ZAT10-like
PGSC0003DMT400077934	zinc finger protein ZAT11-like
PGSC0003DMT400077933	zinc finger protein ZAT11-like
PGSC0003DMT400040143	zinc finger protein ZAT12-like
PGSC0003DMT400001104	zinc finger protein ZAT5
PGSC0003DMT400080288	zinc-finger homeodomain protein 10-like

## Sheet: Genes of the 0.860 PPI network
Table S2 Gene ID and list of up and downregulated genes and transcription factors of potato transcriptome analysis.
Upregulated genes of the 0.860 confidence PPI network
Identifier	Annotation
Cyp	Peptidyl-prolyl cis-trans isomerase-like; Peptidyl-prolyl cis-trans isomerase; PPIases accelerate the folding of proteins. It catalyzes the cis-trans isomerization of proline imidic peptide bonds in oligopeptides (171 aa)
PGSC0003DMT400078142	125 kDa kinesin-related protein-like; Uncharacterized protein; Bipolar kinesin KRP-130; Belongs to the TRAFAC class myosin-kinesin ATPase superfamily. Kinesin family (1044 aa)
PGSC0003DMT400003868	G2/mitotic-specific cyclin-B, other; Uncharacterized protein; Cyclin B2; Belongs to the cyclin family (433 aa)
PGSC0003DMT400072411	Pyruvate kinase 2, cytosolic; Pyruvate kinase; Belongs to the pyruvate kinase family (499 aa)
PGSC0003DMT400000605	Rhodanese-like domain-containing protein 4, chloroplastic; Uncharacterized protein; Chitinase (444 aa)
PGSC0003DMT400036981	Acyl carrier protein-like; Acyl carrier protein; Carrier of the growing fatty acid chain in fatty acid biosynthesis (136 aa)
PGSC0003DMT400016038	Uncharacterized protein; Pyruvate decarboxylase; Belongs to the TPP enzyme family (603 aa)
PGSC0003DMT400059741	Uncharacterized protein; 2-isopropylmalate synthase A; Belongs to the alpha-IPM synthase/homocitrate synthase family (389 aa)
PGSC0003DMT400030898	Dna replication licensing factor mcm5; DNA helicase; Minichromosome maintenance 5 protein; Belongs to the MCM family (737 aa)
PGSC0003DMT400062986	Enolase 1, chloroplastic; Uncharacterized protein; Enolase (488 aa)
PGSC0003DMT400028690	Uncharacterized protein; Enolase (444 aa)
PGSC0003DMT400024240	Uncharacterized protein; Chromosome-associated kinesin KIF4A; Belongs to the TRAFAC class myosin-kinesin ATPase superfamily. Kinesin family (1212 aa)
PGSC0003DMT400018853	3beta-hydroxysteroid-dehydrogenase/decarboxylase isoform 1-like; Uncharacterized protein; 3beta-hydroxysteroid-dehydrogenase/decarboxylase isoform 2 (420 aa)
PGSC0003DMT400035869	Probable trehalose-phosphate phosphatase f; Trehalose 6-phosphate phosphatase; Removes the phosphate from trehalose 6-phosphate to produce free trehalose (345 aa)
PGSC0003DMT400001769	Protein disulfide isomerase-like 2-3; Protein disulfide isomerase family; Belongs to the protein disulfide isomerase family (432 aa)
PGSC0003DMT400042238	Acetyl-coa carboxylase, biotin carboxylase subunit; Uncharacterized protein; Acetyl co-enzyme A carboxylase biotin carboxylase subunit (536 aa)
PGSC0003DMT400042257	Uncharacterized protein; Obtusifoliol 14alpha-demethylase; Belongs to the cytochrome P450 family (487 aa)
PGSC0003DMT400018710	Uncharacterized protein; Exonuclease 1 (778 aa)
PGSC0003DMT400007294	Uncharacterized protein; DNA helicase hus2 (455 aa)
PGSC0003DMT400034809	Uncharacterized protein; Adenylate kinase family; Belongs to the adenylate kinase family (283 aa)
PGSC0003DMT400064385	Large subunit ribosomal protein l8e; 60S ribosomal protein L8 (260 aa)
PGSC0003DMT400021444	Uncharacterized protein; Starch synthase IV (1001 aa)
PGSC0003DMT400029398	Protein curvature thylakoid 1b, chloroplastic; Thylakoid membrane phosphoprotein 14 kDa, chloroplastic (180 aa)
PGSC0003DMT400050235	Malate dehydrogenase, chloroplastic; Uncharacterized protein; NAD-malate dehydrogenase (412 aa)
PGSC0003DMT400045027	Uncharacterized protein; Ketoacyl-ACP Reductase (KAR); Belongs to the short-chain dehydrogenases/reductases (SDR) family (328 aa)
PGSC0003DMT400023333	DNA replication licensing factor MCM7; Belongs to the MCM family (718 aa)
PGSC0003DMT400040760	60S ribosomal protein L13a; Belongs to the universal ribosomal protein uL13 family (206 aa)
PGSC0003DMT400051690	Uncharacterized loc102585732; Uncharacterized protein; Conserved gene of unknown function (152 aa)
CYCD3.2	Uncharacterized protein; D-type cyclin family 3 subgroup 2; Belongs to the cyclin family (358 aa)
UDPGP	UTP--glucose-1-phosphate uridylyltransferase; Plays a central role as a glucosyl donor in cellular metabolic pathways; Belongs to the UDPGP type 1 family (477 aa)
PGSC0003DMT400080556	Timeless-interacting protein; Plays an important role in the control of DNA replication and the maintenance of replication fork stability (290 aa)
PGSC0003DMT400040154	Very-long-chain (3R)-3-hydroxyacyl-CoA dehydratase; Catalyzes the third of the four reactions of the long- chain fatty acids elongation cycle. This endoplasmic reticulum- bound enzymatic process, allows the addition of two carbons to the chain of long- and very long-chain fatty acids/VLCFAs per cycle. This enzyme catalyzes the dehydration of the 3-hydroxyacyl-CoA intermediate into trans-2,3-enoyl…
PGSC0003DMT400045299	Protein disulfide-isomerase-like; Protein disulfide-isomerase (497 aa)
PGSC0003DMT400054692	Uncharacterized loc102584641; Uncharacterized protein; Conserved gene of unknown function (70 aa)
PGSC0003DMT400081378	Blue-light photoreceptor phr2; Uncharacterized protein; DNA photolyase (453 aa)
PGSC0003DMT400058533	Bifunctional dtdp-4-dehydrorhamnose 3,5-epimerase/dtdp-4-dehydrorhamnose reductase; Uncharacterized protein; UDP-L-rhamnose synthase (301 aa)
PGSC0003DMT400072766	Argininosuccinate synthase, chloroplastic; Uncharacterized protein; Argininosuccinate synthase (494 aa)
PGSC0003DMT400048796	Terpene cyclase/mutase family member; Beta-amyrin synthase; Belongs to the terpene cyclase/mutase family (761 aa)
PGSC0003DMT400072569	2-Cys peroxiredoxin BAS1, chloroplastic; Uncharacterized protein; Thioredoxin peroxidase (267 aa)
PGSC0003DMT400042507	Abnormal spindle-like microcephaly-associated protein homolog; Uncharacterized protein; Binding / calmodulin binding (448 aa)
PGSC0003DMT400065156	Uncharacterized protein; 40S ribosomal protein S15a-1; Belongs to the universal ribosomal protein uS8 family (130 aa)
PGSC0003DMT400078610	F-type h+-transporting atpase subunit beta; ATP synthase subunit beta; Produces ATP from ADP in the presence of a proton gradient across the membrane (551 aa)
PGSC0003DMT400018307	Phosphatidylethanolamine-binding protein; Protein SELF-PRUNING (148 aa)
PGSC0003DMT400078206	Tubulin beta-2 chain-like; Tubulin beta chain; Tubulin is the major constituent of microtubules. It binds two moles of GTP, one at an exchangeable site on the beta chain and one at a non-exchangeable site on the alpha chain (446 aa)
PGSC0003DMT400030417	F-type h+-transporting atpase subunit delta; ATP synthase subunit O, mitochondrial; Mitochondrial membrane ATP synthase (F(1)F(0) ATP synthase or Complex V) produces ATP from ADP in the presence of a proton gradient across the membrane which is generated by electron transport complexes of the respiratory chain. F-type ATPases consist of two structural domains, F(1) - containing the extramembraneo…
PGSC0003DMT400061403	Bzip transcription factor 27-like; Self-pruning G-box protein (227 aa)
PGSC0003DMT400035064	Atp-citrate synthase alpha chain protein 2-like; Uncharacterized protein; ATP-citrate synthase (423 aa)
PGSC0003DMT400034706	E3 ubiquitin-protein ligase COP1-like; Ubiquitin ligase protein cop1 (689 aa)
PGSC0003DMT400025922	Checkpoint serine/threonine-protein kinase; Uncharacterized protein; Bubr1 (387 aa)
PGSC0003DMT400083968	40S ribosomal protein S3a; Cyc07; Belongs to the eukaryotic ribosomal protein eS1 family (261 aa)
PGSC0003DMT400064670	6-phosphogluconate dehydrogenase, decarboxylating; Catalyzes the oxidative decarboxylation of 6- phosphogluconate to ribulose 5-phosphate and CO(2), with concomitant reduction of NADP to NADPH; Belongs to the 6-phosphogluconate dehydrogenase family (485 aa)
PGSC0003DMT400028289	Acetyl-coa acetyltransferase, cytosolic 1; Uncharacterized protein; Cytosolic acetoacetyl-coenzyme A thiolase; Belongs to the thiolase family (404 aa)
PGSC0003DMT400042347	Transcription factor e2f3; Uncharacterized protein; E2F4,5 (478 aa)
PGSC0003DMT400071725	Large subunit ribosomal protein l4e; 60S ribosomal protein L1 (406 aa)
SAMDC	S-adenosylmethionine decarboxylase proenzyme; S-adenosylmethionine decarboxylase beta chain; Belongs to the eukaryotic AdoMetDC family (360 aa)
PGSC0003DMT400077257	Small subunit ribosomal protein s16e; Ribosomal protein S9; Belongs to the universal ribosomal protein uS9 family (147 aa)
PGSC0003DMT400061710	Atp-citrate synthase beta chain protein 2-like; Uncharacterized protein; ATP:citrate lyase (608 aa)
PGSC0003DMT400021049	Leucine-rich repeat receptor-like tyrosine-protein kinase pxc3; Uncharacterized protein; Leucine-rich repeat receptor kinase (888 aa)
PGSC0003DMT400065013	Uroporphyrin-iii c-methyltransferase; Uncharacterized protein; S-adenosyl-L-methionine-dependent uroporphyrinogen III methyltransferase; Belongs to the precorrin methyltransferase family (375 aa)
FDH1	Formate dehydrogenase, mitochondrial; Catalyzes the NAD(+)-dependent oxidation of formate to carbon dioxide. Involved in the cell stress response. Involved in formate-dependent oxygen uptake coupled to ATP synthesis; Belongs to the D-isomer specific 2-hydroxyacid dehydrogenase family. FDH subfamily (381 aa)
PGSC0003DMT400082806	Solute carrier family 25 (mitochondrial adenine nucleotide translocator), member 4/5/6/31; ADP,ATP carrier protein; Belongs to the mitochondrial carrier (TC 2.A.29) family (384 aa)
PGSC0003DMT400027015	Glycine cleavage system H protein; The H protein shuttles the methylamine group of glycine from the P protein to the T protein; Belongs to the GcvH family (154 aa)
PGSC0003DMT400001177	Uncharacterized loc102593576; Uncharacterized protein; Conserved gene of unknown function (80 aa)
PGSC0003DMT400055831	Uncharacterized protein; Thioredoxin (183 aa)
PGSC0003DMT400038134	Transcription factor pif1-like; Uncharacterized protein; Phytochrome-interacting factor (515 aa)
PGSC0003DMT400059832	Elongation factor 1-alpha; This protein promotes the GTP-dependent binding of aminoacyl-tRNA to the A-site of ribosomes during protein biosynthesis (448 aa)
PGSC0003DMT400061915	Thioredoxin-like protein slr0233; Uncharacterized protein; Thioredoxin Y1, chloroplastic (170 aa)
PGSC0003DMT400033236	Plant 4,4-dimethylsterol c-4alpha-methyl-monooxygenase; Uncharacterized protein; C-4 sterol methyl oxidase; Belongs to the sterol desaturase family (300 aa)
PGSC0003DMT400023568	Serine/threonine-protein phosphatase 2b regulatory subunit; Uncharacterized protein; Calcium sensor calcineurin B (214 aa)
PGSC0003DMT400005594	DNA helicase; Minichromosome maintenance factor; Belongs to the MCM family (955 aa)
PGSC0003DMT400055567	8-amino-7-oxononanoate synthase; Uncharacterized protein; 7-keto-8-amino pelargonic acid synthase (437 aa)
PGSC0003DMT400079606	2-methylene-furan-3-one reductase; Uncharacterized protein; Alcohol dehydrogenase (388 aa)
PGSC0003DMT400045511	Probable lrr receptor-like serine/threonine-protein kinase at5g48740; Uncharacterized protein; Kinase (904 aa)
PGSC0003DMT400069570	Solute carrier family 25 (mitochondrial phosphate transporter), member 3; Mitochondrial phosphate carrier protein; Belongs to the mitochondrial carrier (TC 2.A.29) family (359 aa)
Cyclin-D3-3-like	CycD3;3 protein; Belongs to the cyclin family (322 aa)
PFP-ALPHA	Pyrophosphate--fructose 6-phosphate 1-phosphotransferase subunit alpha; Regulatory subunit of pyrophosphate--fructose 6- phosphate 1-phosphotransferase (616 aa)
PGSC0003DMT400079464	DNA (cytosine-5)-methyltransferase; Cytosine-specific methyltransferase; Belongs to the class I-like SAM-binding methyltransferase superfamily. C5-methyltransferase family (1460 aa)
PGSC0003DMT400035271	Thioredoxin-dependent peroxiredoxin; Bacterioferritin comigratory protein (213 aa)
PGSC0003DMT400079706	Glutamate decarboxylase isoform1; Belongs to the group II decarboxylase family (502 aa)
PGSC0003DMT400050860	4-hydroxy-tetrahydrodipicolinate synthase, chloroplastic-like; Uncharacterized protein; Dihydrodipicolinate synthase, chloroplastic (357 aa)
PGSC0003DMT400067513	Cell division control protein 7; Uncharacterized protein; Kinase (1024 aa)
PGSC0003DMT400019618	Eukaryotic translation initiation factor 5b; Uncharacterized protein; Conserved gene of unknown function (812 aa)
PGSC0003DMT400078378	Origin of replication complex subunit 4; Component of the origin recognition complex (ORC) that binds origins of replication (419 aa)
PGSC0003DMT400047585	Cell division cycle 20.2, cofactor of apc complex-like; Uncharacterized protein; Cell division control 20 (448 aa)
PGSC0003DMT400062857	E2F transcription factor-like E2FE; Uncharacterized protein; E2F (443 aa)
PGSC0003DMT400047969	Methyltransferase; S-adenosyl-methionine-sterol-C-methyltransferase; Belongs to the class I-like SAM-binding methyltransferase superfamily. Erg6/SMT family (358 aa)
PGSC0003DMT400083778	Peptidyl-prolyl cis-trans isomerase fkbp12; Peptidylprolyl isomerase; CONSTANS interacting protein 3 (112 aa)
PGSC0003DMT400029561	Uncharacterized protein; Glutathione S-transferase APIC; Belongs to the GST superfamily (214 aa)
PGSC0003DMT400064236	Microtubule-associated protein rp/eb family member 1c; Uncharacterized protein; AtEB1c (333 aa)
PGSC0003DMT400067601	Probable phospholipid hydroperoxide glutathione peroxidase; Glutathione peroxidase; Belongs to the glutathione peroxidase family (238 aa)
PGSC0003DMT400012763	Probable phosphopantothenoylcysteine decarboxylase; Uncharacterized protein; Phosphopentothenoylcysteine decarboxylase (206 aa)
PGSC0003DMT400085766	Large subunit ribosomal protein l26e; L24 ribosomal protein (146 aa)
PGSC0003DMT400034628	Condensin complex subunit 3; Uncharacterized protein; EMB2656 (EMBRYO DEFECTIVE 2656); binding (666 aa)
GAMMA-TMT	Uncharacterized protein; Gamma-tocopherol methyltransferase; Belongs to the class I-like SAM-binding methyltransferase superfamily. gTMT family (310 aa)
PGSC0003DMT400028257	Chromatin licensing and dna replication factor 1; Uncharacterized protein; Conserved gene of unknown function (583 aa)
PGSC0003DMT400071831	Cell division control protein 45 homolog; Uncharacterized protein; CDC45 (Cell division cycle 45) (595 aa)
PGSC0003DMT400063662	Uncharacterized protein; Belongs to the cullin family (290 aa)
PGSC0003DMT400041725	Protein flowering locus t-like; Uncharacterized protein; Flowering locus T (177 aa)
PGSC0003DMT400037270	Serine acetyltransferase 1, chloroplastic-like; Uncharacterized protein; Serine acetyltransferase 1 (365 aa)
HXK1	Hexokinase-1; Fructose and glucose phosphorylating enzyme. May be involved in the phosphorylation of glucose during the export from plastids to cytosol. Seems neither to be involved in cell sugar sensing nor in carbohydrate metabolism in tuber (497 aa)
PGSC0003DMT400053750	Tubulin beta-2 chain-like; Tubulin beta chain; Tubulin is the major constituent of microtubules. It binds two moles of GTP, one at an exchangeable site on the beta chain and one at a non-exchangeable site on the alpha chain (445 aa)
PGSC0003DMT400060612	Very-long-chain (3R)-3-hydroxyacyl-CoA dehydratase; Catalyzes the third of the four reactions of the long- chain fatty acids elongation cycle. This endoplasmic reticulum- bound enzymatic process, allows the addition of two carbons to the chain of long- and very long-chain fatty acids/VLCFAs per cycle. This enzyme catalyzes the dehydration of the 3-hydroxyacyl-CoA intermediate into trans-2,3-enoyl…
PGSC0003DMT400054791	Uncharacterized protein; Phosphoenolpyruvate carboxylase (964 aa)
PGSC0003DMT400069847	Large subunit ribosomal protein l29e; 60S ribosomal protein L29; Belongs to the eukaryotic ribosomal protein eL29 family (60 aa)
PGSC0003DMT400083101	Biotin carboxyl carrier protein of acetyl-CoA carboxylase; This protein is a component of the acetyl coenzyme A carboxylase complex; first, biotin carboxylase catalyzes the carboxylation of the carrier protein and then the transcarboxylase transfers the carboxyl group to form malonyl-CoA (258 aa)
PGSC0003DMT400006164	40S ribosomal protein S30; Belongs to the eukaryotic ribosomal protein eS30 family (62 aa)
PGSC0003DMT400013447	Superoxide dismutase [fe], chloroplastic; Uncharacterized protein; Superoxide dismutase (303 aa)
Calreticulin	Uncharacterized protein; Calreticulin (412 aa)
PGSC0003DMT400035344	3-oxoacyl-[acyl-carrier-protein] synthase II, chloroplastic-like; Uncharacterized protein; Beta-ketoacyl-ACP synthase II; Belongs to the beta-ketoacyl-ACP synthases family (540 aa)
PGSC0003DMT400035809	Replication protein a 32 kda subunit a; Uncharacterized protein; Replication factor A (272 aa)
PGSC0003DMT400071330	Triosephosphate isomerase, cytosolic; Uncharacterized protein; Triosephosphate isomerase (254 aa)
PGSC0003DMT400078207	Proliferating cell nuclear antigen; This protein is an auxiliary protein of DNA polymerase delta and is involved in the control of eukaryotic DNA replication by increasing the polymerase's processibility during elongation of the leading strand (264 aa)
PGSC0003DMT400040416	Putative uncharacterized protein ddb_g0287975; Uncharacterized protein; Conserved gene of unknown function (134 aa)
PGSC0003DMT400084297	E3 ubiquitin-protein ligase ORTHRUS 2-like; Zinc finger protein (686 aa)
Cyclin-A2-2-like	Uncharacterized protein; Cyclin A2; Belongs to the cyclin family (497 aa)
PGSC0003DMT400037582	Uncharacterized protein; Aldehyde dehydrogenase (NAD+); Belongs to the aldehyde dehydrogenase family (594 aa)
PGSC0003DMT400069374	3-oxoacyl-[acyl-carrier-protein] reductase 4-like; Belongs to the short-chain dehydrogenases/reductases (SDR) family (321 aa)
PGSC0003DMT400025910	Uncharacterized protein; B2-type cyclin dependent kinase; Belongs to the protein kinase superfamily (315 aa)
PGSC0003DMT400052657	Proteasome subunit alpha type; The proteasome is a multicatalytic proteinase complex which is characterized by its ability to cleave peptides with Arg, Phe, Tyr, Leu, and Glu adjacent to the leaving group at neutral or slightly basic pH; Belongs to the peptidase T1A family (235 aa)
PGSC0003DMT400029242	Glyceraldehyde-3-phosphate dehydrogenase GAPCP1, chloroplastic-like; Glyceraldehyde-3-phosphate dehydrogenase; Belongs to the glyceraldehyde-3-phosphate dehydrogenase family (419 aa)
PGSC0003DMT400043567	Probable phytol kinase 1, chloroplastic; Uncharacterized protein; Phytol kinase (308 aa)
PGSC0003DMT400023253	Brct domain-containing protein at4g02110; BRCA1 C Terminus domain containing protein (1214 aa)
PGSC0003DMT400014704	Uncharacterized protein; Exonuclease (542 aa)
PGSC0003DMT400007571	Pyruvate dehydrogenase e1 component subunit alpha-3, chloroplastic-like; Pyruvate dehydrogenase E1 component subunit alpha; The pyruvate dehydrogenase complex catalyzes the overall conversion of pyruvate to acetyl-CoA and CO(2) (440 aa)
PGSC0003DMT400063677	Histone h2a.1; Belongs to the histone H2A family (146 aa)
PGSC0003DMT400018192	Trifunctional udp-glucose 4,6-dehydratase/udp-4-keto-6-deoxy-d-glucose 3,5-epimerase/udp-4-keto-l-rhamnose-reductase rhm1; Uncharacterized protein; RHM1/ROL1 (674 aa)
ASN1	Uncharacterized protein; Asparagine synthetase [glutamine-hydrolyzing] (590 aa)
PGSC0003DMT400038561	Atp-dependent dna helicase ddm1-like; Uncharacterized protein; ISWI chromatin remodeling complex ATPase ISW1 (760 aa)
PGSC0003DMT400020968	Elongation factor 1-alpha-like protein; Elongation factor 1-alpha; This protein promotes the GTP-dependent binding of aminoacyl-tRNA to the A-site of ribosomes during protein biosynthesis (447 aa)
PGSC0003DMT400006894	Fructose-bisphosphate aldolase-like protein; Belongs to the class I fructose-bisphosphate aldolase family (358 aa)
PGSC0003DMT400019322	Phosphoenolpyruvate carboxylase 4; Uncharacterized protein; Phosphoenolpyruvate carboxylase (1050 aa)
PGSC0003DMT400038616	Uncharacterized protein; Leucine-rich repeat receptor kinase; Belongs to the protein kinase superfamily. Ser/Thr protein kinase family (682 aa)
PGSC0003DMT400018071	Spindle and kinetochore-associated protein 1 homolog (265 aa)
PGSC0003DMT400026641	Dna excision repair protein ercc-6; DNA repair and recombination protein RAD26 (1213 aa)
PGSC0003DMT400056814	Ubiquitin-conjugating enzyme e2 t; Ubiquitin carrier protein; Belongs to the ubiquitin-conjugating enzyme family (581 aa)
PGSC0003DMT400063904	Small subunit ribosomal protein s2e; 40S ribosomal protein S2; Belongs to the universal ribosomal protein uS5 family (280 aa)
Delta(7)-sterol-C5(6)-desaturase	Uncharacterized protein; Delta(7)-sterol-C5(6)-desaturase; Belongs to the sterol desaturase family (271 aa)
PGSC0003DMT400030176	Uncharacterized protein; Cyclin A; Belongs to the cyclin family (356 aa)
PGSC0003DMT400014828	Nucleoside diphosphate kinase 3-like; Nucleoside diphosphate kinase (232 aa)
PGSC0003DMT400006733	Uncharacterized loc102585896; Uncharacterized protein; ESTs AU078251(R0889) (130 aa)
Apsr1	5'-adenylylsulfate reductase 1, chloroplastic; Uncharacterized protein; Adenylyl-sulfate reductase (460 aa)
CS-A	Cytosolic cysteine synthase (325 aa)
PGSC0003DMT400056871	Phosphoglycerate kinase, cytosolic-like; Phosphoglycerate kinase; Belongs to the phosphoglycerate kinase family (401 aa)
PGSC0003DMT400079711	DNA polymerase epsilon subunit; Participates in DNA repair and in chromosomal DNA replication (529 aa)
PGSC0003DMT400060503	DNA replication complex GINS protein PSF2; Belongs to the GINS2/PSF2 family (210 aa)
PGSC0003DMT400017668	Cycloartenol-C-24-methyltransferase 1; Methyltransferase; S-adenosyl-methionine-sterol-C-methyltransferase; Belongs to the class I-like SAM-binding methyltransferase superfamily. Erg6/SMT family (346 aa)
PGSC0003DMT400040011	Atp-dependent dna helicase ddm1-like; Uncharacterized protein; ISWI chromatin remodeling complex ATPase ISW1 (754 aa)
[truncated: 196 more rows]
